# Supplementary material for: Large-Sample Genome-Wide Association Study of Resistance to Retained Placenta in U.S. Holstein Cows
Source: MDPI journal article supplement (doi:10.3390/ijms25105551), 2024-05-20
Supplement: s1 [file s1]

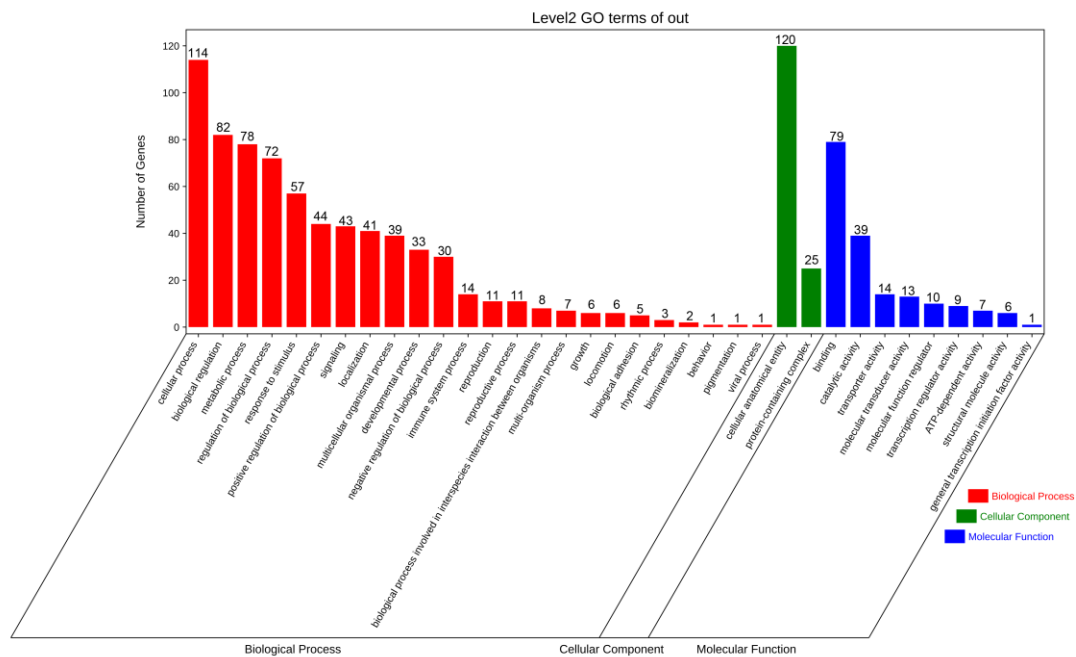

**Figure S1:** Biological process, cellular component and molecular function of candidate genes for 200 significant additive effects.
