# Supplementary material for: Large-Sample Genome-Wide Association Study of Resistance to Retained Placenta in U.S. Holstein Cows
Source: Int J Mol Sci. 2024 May 20;25(10):5551. doi: 10.3390/ijms25105551 (PMC11122073; doi:10.3390/ijms25105551)
Supplement: Supplementary file 1 [file ijms-25-05551-s001.zip › Table_S1.xlsx]

## Sheet: S1
Table S1. Significant additive effects of RETP.
SNP	Chr	position	Candidate gene	rank	Trait	Test	Effect	Tvalue	log10(1/p)	rank	al+	ae+	ae+2	f_al+	al-	ae-	ae-2	f_al-
rs110506590	5	17780338	LOC112446836;C5H12orf50	42	retp	a	0.175348	7.2002	11.8353	42	1	0.117	0.114256	0.332	2	-0.0582	-0.0610926	0.668
rs136124246	5	17909902	ENSBTAG00000051348	39	retp	a	0.175627	7.22255	11.9079	39	1	0.117	0.114156	0.332	2	-0.0582	-0.0614714	0.668
rs41591871	5	18009488	TMTC3;KITLG	106	retp	a	-0.150993	6.42982	9.4689	106	2	0.0941	0.0922022	0.377	1	-0.0569	-0.0587905	0.623
rs109015246	5	18259786	KITLG	129	retp	a	0.152608	6.31737	9.1452	129	1	0.0987	0.0946823	0.353	2	-0.0539	-0.057926	0.647
rs41587994	5	18367350	KITLG;LOC104972350	25	retp	a	0.197756	7.6151	13.2173	25	1	0.147	0.147362	0.258	2	-0.051	-0.050394	0.742
rs41566068	5	18410599	KITLG;LOC104972350	84	retp	a	0.160689	6.63319	10.0684	84	1	0.108	0.106946	0.328	2	-0.0526	-0.053743	0.672
rs29012239	5	18679362	LOC104972350;LOC104972370	31	retp	a	0.185167	7.4063	12.5124	31	1	0.131	0.129897	0.292	2	-0.054	-0.05527	0.708
rs137455368	5	18799786	LOC104972350;LOC104972370	64	retp	a	0.161262	6.85607	10.7461	64	1	0.101	0.100358	0.373	2	-0.0602	-0.0609037	0.627
rs137849055	5	18861017	LOC104972350;LOC104972370	70	retp	a	0.159512	6.75835	10.4463	70	1	0.0992	0.0969716	0.378	2	-0.0603	-0.0625407	0.622
rs41603721	5	19295836	POC1B	28	retp	a	-0.186851	7.56912	13.0605	28	2	0.129	0.128307	0.307	1	-0.0574	-0.0585432	0.693
rs110476952	5	19431606	LOC112446834	92	retp	a	-0.152272	6.54032	9.7924	92	2	0.0927	0.0917522	0.391	1	-0.0596	-0.0605196	0.609
rs109747382	5	19468540	LOC112446635;ATP2B1	67	retp	a	-0.159451	6.80189	10.5794	67	2	0.0994	0.0981244	0.376	1	-0.06	-0.0613271	0.624
rs110263429	5	19853714	LOC112446651;TRNAC-ACA_25	69	retp	a	-0.161575	6.76611	10.4699	69	2	0.101	0.0970369	0.375	1	-0.0606	-0.0645386	0.625
rs41630099	5	19918600	LOC112446651;TRNAC-ACA_25	100	retp	a	0.156371	6.4696	9.5847	100	1	0.105	0.103406	0.33	2	-0.0517	-0.0529647	0.67
rs134551295	5	20097603	LOC112446651;TRNAC-ACA_25	124	retp	a	-0.149386	6.35023	9.2392	124	2	0.0876	0.0845375	0.414	1	-0.0618	-0.0648487	0.586
rs109198726	5	20384603	TRNAC-ACA_25;LOC112446835	185	retp	a	-0.137147	5.99983	8.2612	185	2	0.0694	0.0666922	0.494	1	-0.0678	-0.0704552	0.506
rs110440388	5	20544206	LOC100848024;LOC112446652	193	retp	a	-0.135967	5.95021	8.127	193	2	0.0725	0.0711709	0.467	1	-0.0635	-0.0647965	0.533
rs29024423	5	21322764	DCN;LOC112446653	137	retp	a	-0.143758	6.26922	9.0083	137	2	0.0822	0.080792	0.428	1	-0.0616	-0.0629655	0.572
rs109666462	5	21351449	DCN;LOC112446653	109	retp	a	-0.149341	6.42687	9.4603	109	2	0.0854	0.083535	0.428	1	-0.0639	-0.065806	0.572
rs110018224	5	21379182	DCN;LOC112446653	111	retp	a	0.149776	6.40088	9.3851	111	1	0.0743	0.0798514	0.504	2	-0.0755	-0.0699248	0.496
rs41662318	5	21694867	LOC112446653(u)	177	retp	a	-0.138016	6.06166	8.4298	177	2	0.072	0.070762	0.478	1	-0.066	-0.0672538	0.522
rs109077611	5	21795271	LOC112446653(u)	150	retp	a	0.146888	6.20165	8.8179	150	1	0.0568	0.0608912	0.613	2	-0.0901	-0.0859965	0.387
rs109530663	5	21873312	LOC104972363	164	retp	a	-0.141926	6.14822	8.6688	164	2	0.0617	0.0603877	0.565	1	-0.0802	-0.0815382	0.435
rs110876576	5	21906567	LOC104972363	139	retp	a	-0.147521	6.25323	8.9631	139	2	0.0633	0.0602986	0.571	1	-0.0842	-0.0872223	0.429
rs109860940	5	25623553	GTSF1	82	retp	a	-0.151878	6.63881	10.0852	82	2	0.0838	0.0823161	0.448	1	-0.0681	-0.0695621	0.552
rs135127542	5	26178969	LOC112446847;CALCOCO1	36	retp	a	-0.177505	7.24656	11.986	36	2	0.122	0.120398	0.313	1	-0.0556	-0.0571071	0.687
rs133757075	5	26984066	EIF4B;KRT18	97	retp	a	0.160318	6.47891	9.6119	97	1	0.111	0.106188	0.309	2	-0.0495	-0.0541302	0.691
rs110165899	5	27005657	KRT18;LOC104976949	17	retp	a	0.184346	7.70106	13.5131	17	1	0.118	0.114045	0.358	2	-0.066	-0.070301	0.642
rs132958677	5	27139413	KRT3	103	retp	a	0.147614	6.45198	9.5333	103	1	0.0679	0.0656043	0.54	2	-0.0797	-0.0820099	0.46
rs137107793	5	28970729	HIGD1C	56	retp	a	0.161629	6.99891	11.1919	56	1	0.0704	0.0712253	0.564	2	-0.0912	-0.0904034	0.436
rs135524890	5	28982336	HIGD1C	176	retp	a	-0.14994	6.06459	8.4379	176	2	0.103	0.102088	0.312	1	-0.0468	-0.0478517	0.688
rs135845669	5	30224377	PRPF40B	71	retp	a	0.163929	6.75624	10.4399	71	1	0.11	0.109857	0.327	2	-0.0536	-0.0540712	0.673
rs110013291	5	36026278	TMEM117	169	retp	a	0.142654	6.09561	8.5232	169	1	0.0871	0.0839102	0.389	2	-0.0555	-0.058744	0.611
rs110559672	5	68861989	C5H12orf75	166	retp	a	0.191998	6.14514	8.6602	166	1	0.161	0.158241	0.16	2	-0.0307	-0.0337577	0.84
rs133872850	5	93061021	TRNAG-UCC_10;TRNAC-ACA_29	184	retp	a	-0.194581	6.02381	8.3264	184	2	0.0283	0.0260681	0.855	1	-0.166	-0.168513	0.145
rs137664040	6	86795926	SLC4A4	175	retp	a	-0.142834	6.06827	8.448	175	2	0.0567	0.0511345	0.603	1	-0.0861	-0.0916998	0.397
rs110434046	6	87184768	GC;NPFFR2	108	retp	a	-0.151793	6.42955	9.4681	108	2	0.0564	0.0546349	0.628	1	-0.0954	-0.0971585	0.372
rs109034709	6	87316810	NPFFR2	104	retp	a	-0.152422	6.45172	9.5326	104	2	0.0566	0.0539577	0.628	1	-0.0958	-0.0984639	0.372
rs3423224824	7	8274451	OR7A5;LOC510712	78	retp	a	-0.173887	6.67195	10.1847	78	2	0.128	0.128163	0.264	1	-0.046	-0.0457241	0.736
rs42611495	9	87422793	IYD	196	retp	a	0.139027	5.93866	8.096	196	1	0.0714	0.0766741	0.487	2	-0.0676	-0.0623532	0.513
rs42026926	9	87610236	LOC100848331;PLEKHG1	12	retp	a	0.183213	7.76741	13.7435	12	1	0.0799	0.0860332	0.564	2	-0.103	-0.0971803	0.436
rs42026914	9	87634273	LOC100848331;PLEKHG1	63	retp	a	0.158238	6.85745	10.7504	63	1	0.075	0.0770765	0.526	2	-0.0833	-0.0811616	0.474
rs42025006	9	87831540	PLEKHG1	81	retp	a	0.153059	6.63943	10.087	81	1	0.0809	0.0840464	0.471	2	-0.0721	-0.0690126	0.529
rs43615609	9	88220932	MTHFD1L;LOC101904510	43	retp	a	0.174692	7.18776	11.7951	43	1	0.0623	0.0627502	0.644	2	-0.112	-0.111941	0.356
rs43615544	9	88254314	LOC104969623;AKAP12	2	retp	a	-0.209871	8.38011	15.9624	2	2	0.0616	0.0603318	0.706	1	-0.148	-0.149539	0.294
rs43612983	9	88482928	RMND1	5	retp	a	0.196835	8.14841	15.1041	5	1	0.0702	0.0723956	0.643	2	-0.127	-0.124439	0.357
rs43611719	9	88519048	LOC112448080	1	retp	a	-0.245957	9.66868	21.1617	1	2	0.0714	0.0715117	0.71	1	-0.175	-0.174445	0.29
rs43611710	9	88529494	CCDC170	3	retp	a	-0.198523	8.3262	15.7606	3	2	0.0702	0.0685563	0.646	1	-0.128	-0.129967	0.354
rs43611701	9	88540232	CCDC170	10	retp	a	-0.182473	7.93473	14.3332	10	2	0.081	0.0800285	0.556	1	-0.102	-0.102444	0.444
rs43610624	9	88559478	CCDC170	172	retp	a	-0.139998	6.08936	8.506	172	2	0.0757	0.0727333	0.459	1	-0.0643	-0.0672645	0.541
rs110401672	9	88561108	CCDC170	128	retp	a	-0.153515	6.3317	9.1862	128	2	0.0507	0.048049	0.67	1	-0.103	-0.105467	0.33
rs43610539	9	88598336	CCDC170	27	retp	a	-0.188685	7.58854	13.1266	27	2	0.0568	0.0537511	0.699	1	-0.132	-0.134933	0.301
rs43608567	9	88684552	ESR1	29	retp	a	-0.177006	7.46173	12.6977	29	2	0.0634	0.0622675	0.642	1	-0.114	-0.114739	0.358
rs3423297865	9	88722921	ESR1	21	retp	a	0.188016	7.68683	13.4639	21	1	0.0676	0.0705085	0.641	2	-0.12	-0.117508	0.359
rs43767108	9	88739977	ESR1	20	retp	a	0.188123	7.691	13.4783	20	1	0.0676	0.0705964	0.641	2	-0.121	-0.117526	0.359
rs29025303	9	89373227	SYNE1	86	retp	a	0.152804	6.61311	10.0083	86	1	0.089	0.0869376	0.417	2	-0.0638	-0.0658663	0.583
rs110287508	9	91367339	LOC112448142;LOC112448083	161	retp	a	0.17426	6.15515	8.6881	161	1	0.0355	0.0345407	0.796	2	-0.139	-0.139719	0.204
rs110157040	9	92146096	NOX3(d)	80	retp	a	-0.151807	6.66154	10.1534	80	2	0.0712	0.0699441	0.531	1	-0.0806	-0.0818632	0.469
rs137048757	9	93178251	LOC514725;LOC112448085	163	retp	a	0.144309	6.15039	8.6748	163	1	0.0881	0.0876421	0.39	2	-0.0563	-0.0566673	0.61
rs110089293	9	94347644	ZDHHC14;SNX9	122	retp	a	-0.163439	6.35494	9.2527	122	2	0.12	0.118549	0.264	1	-0.0431	-0.0448906	0.736
rs3423289809	9	95337452	RSPH3	105	retp	a	-0.153072	6.43999	9.4985	105	2	0.0573	0.0578409	0.626	1	-0.0958	-0.0952315	0.374
rs134447834	9	96763612	MAP3K4	155	retp	a	0.152808	6.19452	8.798	155	1	0.103	0.104644	0.325	2	-0.0497	-0.0481644	0.675
rs109718130	10	34176744	RASGRP1	180	retp	a	-0.150463	6.05542	8.4128	180	2	0.0469	0.0469415	0.689	1	-0.104	-0.103522	0.311
rs43626966	10	51788612	LIPC	187	retp	a	0.166078	5.98963	8.2335	187	1	0.0357	0.0342849	0.785	2	-0.13	-0.131793	0.215
rs134803777	15	26003268	CADM1	149	retp	a	0.169531	6.2039	8.8242	149	1	0.0384	0.0369656	0.774	2	-0.131	-0.132566	0.226
rs110051699	15	27790499	SIK3;PAFAH1B2	127	retp	a	-0.196219	6.34246	9.217	127	2	0.035	0.0334889	0.822	1	-0.161	-0.162731	0.178
rs110222319	15	28670668	IL10RA	89	retp	a	0.200135	6.56943	9.8785	89	1	0.0347	0.0366569	0.827	2	-0.165	-0.163478	0.173
rs42758378	15	31214921	GRIK4	116	retp	a	0.190837	6.3794	9.3231	116	1	0.0337	0.0320783	0.823	2	-0.157	-0.158759	0.177
rs110541271	15	38250548	COPB1	151	retp	a	0.215334	6.19867	8.8096	151	1	0.0272	0.0250351	0.874	2	-0.188	-0.190299	0.126
rs133481154	15	38458720	SPON1	90	retp	a	0.198041	6.55206	9.827	90	1	0.0351	0.0345223	0.823	2	-0.163	-0.163519	0.177
rs109757516	15	39681436	RASSF10	183	retp	a	0.215299	6.02642	8.3335	183	1	0.0249	0.0235214	0.884	2	-0.19	-0.191778	0.116
rs110752919	15	48508946	LOC100294814;LOC781483	200	retp	a	0.162532	5.91911	8.0435	200	1	0.0359	0.0342117	0.779	2	-0.127	-0.12832	0.221
rs3423093415	15	49683333	OR52S6	144	retp	a	0.143459	6.23757	8.9189	144	1	0.062	0.0606733	0.568	2	-0.0815	-0.0827861	0.432
rs133387220	15	51373491	ENSBTAG00000048692zuoxiangART1	188	retp	a	-0.175176	5.9879	8.2288	188	2	0.0327	0.0316915	0.813	1	-0.142	-0.143484	0.187
rs109205072	15	58211961	LGR4;LIN7C	171	retp	a	-0.139219	6.09024	8.5084	171	2	0.0717	0.0699638	0.485	1	-0.0675	-0.0692551	0.515
rs41614113	15	61522393	LOC112441584;DCDC1	95	retp	a	-0.152265	6.50254	9.6812	95	2	0.0927	0.0922368	0.391	1	-0.0596	-0.0600284	0.609
rs133296429	15	65887087	SLC1A2	48	retp	a	0.163149	7.08261	11.4573	48	1	0.0717	0.0695748	0.56	2	-0.0914	-0.0935738	0.44
rs134556064	15	66440252	LDLRAD3	145	retp	a	0.146919	6.23268	8.9051	145	1	0.0575	0.0581575	0.609	2	-0.0894	-0.0887616	0.391
rs41777298	15	66764773	PRR5L	165	retp	a	-0.140253	6.14565	8.6616	165	2	0.0746	0.0741038	0.468	1	-0.0657	-0.0661497	0.532
rs43023167	17	9079059	LOC101905833;LOC112441991	132	retp	a	-0.151114	6.3118	9.1293	132	2	0.0989	0.0965144	0.345	1	-0.0522	-0.0545994	0.655
rs41834619	17	10262205	ARHGAP10	115	retp	a	0.147663	6.38018	9.3253	115	1	0.0689	0.0664733	0.533	2	-0.0787	-0.0811898	0.467
rs42564252	17	10814317	EDNRA;LOC101906544	190	retp	a	0.155178	5.96061	8.1551	190	1	0.115	0.113748	0.259	2	-0.0401	-0.0414306	0.741
rs42777044	17	11123276	EDNRA;LOC101906544	61	retp	a	-0.173139	6.88111	10.8236	61	2	0.123	0.121969	0.292	1	-0.0505	-0.0511697	0.708
BovineHD1700003257	17	11182410	LOC101906544	162	retp	a	0.16994	6.15264	8.6811	162	1	0.13	0.129636	0.233	2	-0.0396	-0.0403035	0.767
rs137644488	17	11500017	TTC29	156	retp	a	-0.162488	6.18872	8.7817	156	2	0.119	0.116654	0.265	1	-0.0431	-0.0458343	0.735
rs109689804	17	11902545	SLC10A7	99	retp	a	-0.150059	6.47377	9.5969	99	2	0.0713	0.0717978	0.525	1	-0.0788	-0.0782613	0.475
rs41838712	17	12116917	REELD1	50	retp	a	0.168031	7.03865	11.3176	50	1	0.102	0.0986747	0.394	2	-0.0663	-0.0693565	0.606
rs135568506	17	12152677	REELD1;LSM6	133	retp	a	-0.153125	6.28957	9.0661	133	2	0.0936	0.0950544	0.388	1	-0.0595	-0.0580705	0.612
rs42869402	17	12172928	LSM6	160	retp	a	-0.149201	6.15591	8.6902	160	2	0.092	0.0889853	0.383	1	-0.0572	-0.0602153	0.617
rs41838146	17	12391969	ZNF827	113	retp	a	0.170948	6.38512	9.3396	113	1	0.127	0.12486	0.259	2	-0.0443	-0.0460875	0.741
rs41838759	17	12423631	ZNF827	83	retp	a	0.173205	6.63551	10.0753	83	1	0.125	0.123924	0.281	2	-0.0486	-0.049281	0.719
rs41635288	17	12449485	ZNF827	120	retp	a	-0.147799	6.35966	9.2663	120	2	0.0885	0.0874793	0.402	1	-0.0593	-0.0603198	0.598
rs41838810	17	12527230	ZNF827	152	retp	a	0.14192	6.19826	8.8084	152	1	0.0788	0.0775303	0.444	2	-0.0631	-0.0643893	0.556
rs29021975	17	12653716	MMAA	198	retp	a	-0.139561	5.92821	8.0679	198	2	0.0867	0.0851956	0.379	1	-0.0528	-0.0543656	0.621
rs41840262	17	12682664	MMAA;SMAD1	76	retp	a	0.153279	6.72457	10.3436	76	1	0.0795	0.0780253	0.481	2	-0.0738	-0.0752534	0.519
rs41636555	17	12707522	MMAA;SMAD1	199	retp	a	-0.144294	5.92778	8.0668	199	2	0.091	0.0897234	0.369	1	-0.0533	-0.0545706	0.631
rs137085051	17	12842225	LOC112441992	94	retp	a	-0.147975	6.50378	9.6848	94	2	0.0724	0.0715806	0.511	1	-0.0756	-0.0763939	0.489
rs41599601	17	12866447	LOC112441992	52	retp	a	0.160478	7.02557	11.2761	52	1	0.0753	0.073964	0.531	2	-0.0852	-0.0865138	0.469
rs135912416	17	12902838	LOC112441992;LOC112442089	14	retp	a	-0.180173	7.75473	13.6994	14	2	0.0924	0.0928437	0.487	1	-0.0878	-0.0873288	0.513
rs137219013	17	13350634	ANAPC10;HHIP	24	retp	a	0.175888	7.64312	13.3134	24	1	0.0776	0.0780125	0.559	2	-0.0983	-0.0978759	0.441
rs109014997	17	13415818	ANAPC10;HHIP	141	retp	a	0.141982	6.24144	8.9298	141	1	0.0737	0.0730261	0.481	2	-0.0682	-0.0689554	0.519
rs109759628	17	13457151	HHIP	181	retp	a	0.163229	6.0534	8.4072	181	1	0.125	0.124245	0.233	2	-0.0381	-0.0389842	0.767
rs42426177	17	13730761	HHIP;TRNAC-GCA_189	146	retp	a	0.142526	6.23147	8.9017	146	1	0.0709	0.0704537	0.503	2	-0.0717	-0.0720726	0.497
rs134125689	17	13731790	HHIP;TRNAC-GCA_189	154	retp	a	0.143437	6.19592	8.8019	154	1	0.0718	0.0722696	0.499	2	-0.0716	-0.0711673	0.501
rs137504512	17	13801294	TRNAC-GCA_189;TRNAG-UCC_41	49	retp	a	-0.163258	7.04565	11.3397	49	2	0.0811	0.0812482	0.503	1	-0.0822	-0.0820102	0.497
rs135338842	17	13955510	TRNAG-UCC_41;GYPA	191	retp	a	-0.142033	5.95458	8.1388	191	2	0.0912	0.090544	0.358	1	-0.0508	-0.0514892	0.642
rs110506044	17	14240828	FREM3	126	retp	a	-0.154666	6.34646	9.2284	126	2	0.102	0.100672	0.343	1	-0.0531	-0.0539942	0.657
rs110832982	17	14265993	FREM3	101	retp	a	-0.15442	6.46475	9.5706	101	2	0.101	0.10018	0.347	1	-0.0536	-0.0542397	0.653
rs109337343	17	14355308	SMARCA5	74	retp	a	-0.163791	6.73423	10.3729	74	2	0.111	0.10945	0.324	1	-0.053	-0.0543414	0.676
rs41578879	17	14620970	LOC112442090;USP38	192	retp	a	-0.137907	5.9516	8.1308	192	2	0.0689	0.0686954	0.5	1	-0.069	-0.0692114	0.5
rs110739449	17	15056547	LOC112442091	6	retp	a	-0.186848	8.10285	14.9381	6	2	0.0794	0.0765239	0.575	1	-0.107	-0.110324	0.425
rs110692428	17	15328825	LOC112442091	98	retp	a	0.154964	6.47407	9.5978	98	1	0.101	0.0997123	0.348	2	-0.054	-0.0552517	0.652
rs135942163	17	15575256	INPP4B	197	retp	a	-0.151802	5.93085	8.075	197	2	0.108	0.106024	0.29	1	-0.044	-0.0457782	0.71
rs41610899	17	16144638	IL15;ZNF330	66	retp	a	0.160703	6.83139	10.67	66	1	0.0999	0.0978057	0.378	2	-0.0608	-0.0628975	0.622
rs109468604	17	16189298	IL15;ZNF330	142	retp	a	-0.14506	6.23853	8.9216	142	2	0.0685	0.0677339	0.528	1	-0.0766	-0.0773256	0.472
rs134030652	17	16323674	IL15;ZNF330	130	retp	a	-0.150948	6.31719	9.1447	130	2	0.0908	0.0895707	0.399	1	-0.0602	-0.0613775	0.601
rs135397482	17	16325626	IL15;ZNF330	53	retp	a	0.160616	7.01268	11.2354	53	1	0.0887	0.085998	0.447	2	-0.0719	-0.0746177	0.553
rs133522203	17	16326223	IL15;ZNF330	136	retp	a	0.147706	6.27926	9.0368	136	1	0.0887	0.0871816	0.4	2	-0.059	-0.0605245	0.6
rs109572161	17	16399921	IL15;ZNF330	26	retp	a	-0.174029	7.60504	13.183	26	2	0.0791	0.078275	0.546	1	-0.095	-0.0957536	0.454
rs108973145	17	16489833	IL15;ZNF330	46	retp	a	-0.163936	7.14069	11.6433	46	2	0.072	0.0708811	0.561	1	-0.0919	-0.0930546	0.439
rs137138595	17	16533072	IL15;ZNF330	121	retp	a	-0.149872	6.35556	9.2545	121	2	0.0913	0.0887094	0.391	1	-0.0586	-0.0611622	0.609
rs109015127	17	16956817	RNF150;TBC1D9	72	retp	a	-0.154331	6.75468	10.4351	72	2	0.0701	0.0688983	0.546	1	-0.0842	-0.0854323	0.454
rs137293650	17	17011389	RNF150;TBC1D9	148	retp	a	-0.14221	6.21329	8.8506	148	2	0.0751	0.0749773	0.472	1	-0.0671	-0.0672329	0.528
rs109486788	17	17090817	TBC1D9	40	retp	a	0.168676	7.21533	11.8844	40	1	0.0771	0.07411	0.543	2	-0.0916	-0.0945663	0.457
rs110376965	17	17165807	UCP1	57	retp	a	-0.159251	6.99647	11.1843	57	2	0.0808	0.0793294	0.493	1	-0.0784	-0.0799215	0.507
rs109422938	17	17543689	LOC107133280;MAML3	58	retp	a	0.161554	6.95639	11.0583	58	1	0.0917	0.0895425	0.432	2	-0.0698	-0.0720116	0.568
BovineHD1700003149	17	18196079	SETD7	87	retp	a	-0.175811	6.58319	9.9193	87	2	0.131	0.129614	0.253	1	-0.0444	-0.0461967	0.747
rs42853849	17	46078006	ADGRD1	194	retp	a	-0.139538	5.94352	8.109	194	2	0.0833	0.0855443	0.403	1	-0.0562	-0.0539938	0.597
rs42906672	17	46739443	PIWIL1	134	retp	a	-0.144799	6.28453	9.0517	134	2	0.0617	0.060231	0.574	1	-0.0831	-0.0845679	0.426
rs41667334	17	46785750	PIWIL1;TRNAG-CCC_112	93	retp	a	-0.151956	6.50714	9.6947	93	2	0.0586	0.0571932	0.615	1	-0.0934	-0.0947627	0.385
rs110235930	19	61387218	ABCA10	96	retp	a	-0.152797	6.48178	9.6203	96	2	0.0573	0.056046	0.625	1	-0.0955	-0.0967514	0.375
rs41932313	19	61518347	ABCA9	125	retp	a	-0.178579	6.3502	9.2391	125	2	0.0379	0.0380061	0.788	1	-0.141	-0.140573	0.212
rs109279669	23	11178492	TBC1D22B	138	retp	a	-0.157502	6.26406	8.9937	138	2	0.0469	0.050456	0.703	1	-0.111	-0.107046	0.297
rs29022431	23	21294986	PTCHD4;LOC781325	186	retp	a	0.152059	5.99689	8.2532	186	1	0.109	0.108296	0.283	2	-0.043	-0.0437636	0.717
rs109526784	23	22148869	LOC785693;MUT	102	retp	a	0.151017	6.45728	9.5488	102	1	0.0602	0.0607518	0.601	2	-0.0908	-0.0902648	0.399
rs137200225	23	22461608	CRISP3	85	retp	a	-0.152926	6.62717	10.0504	85	2	0.0646	0.0644223	0.578	1	-0.0883	-0.0885042	0.422
rs137002626	23	23436672	TFAP2B;TRNAY-AUA_9	110	retp	a	-0.151482	6.41356	9.4217	110	2	0.0934	0.0939268	0.383	1	-0.0581	-0.0575549	0.617
rs110556135	23	23704336	TRNAY-AUA_9;PKHD1	23	retp	a	0.224024	7.64703	13.3268	23	1	0.0419	0.0417664	0.813	2	-0.182	-0.182258	0.187
rs136138952	23	23715432	TRNAY-AUA_9;PKHD1	107	retp	a	0.158598	6.42957	9.4682	107	1	0.0527	0.0554214	0.667	2	-0.106	-0.103176	0.333
rs43561755	23	23750046	TRNAY-AUA_9;PKHD1	45	retp	a	-0.216379	7.1732	11.748	45	2	0.0393	0.0387832	0.819	1	-0.177	-0.177596	0.181
BTA-81662-no-rs	23	23890370	TRNAY-AUA_9;PKHD1	51	retp	a	-0.165778	7.03368	11.3018	51	2	0.0616	0.0608406	0.629	1	-0.104	-0.104938	0.371
rs134531762	23	24042732	PKHD1(u)	131	retp	a	0.14733	6.31243	9.1311	131	1	0.0806	0.0818034	0.453	2	-0.0668	-0.0655264	0.547
rs41670209	23	24060064	PKHD1(u)	41	retp	a	-0.182682	7.2144	11.8814	41	2	0.0515	0.0501152	0.718	1	-0.131	-0.132567	0.282
rs109748938	23	24144690	PKHD1	147	retp	a	-0.169223	6.21771	8.863	147	2	0.0399	0.040471	0.764	1	-0.129	-0.128752	0.236
rs109496914	23	24211654	PKHD1	60	retp	a	0.184808	6.90741	10.9053	60	1	0.0445	0.0420175	0.759	2	-0.14	-0.14279	0.241
rs136181786	23	24252119	PKHD1	38	retp	a	-0.180357	7.23171	11.9376	38	2	0.0577	0.056908	0.68	1	-0.123	-0.123449	0.32
rs42031700	23	24409973	PKHD1	59	retp	a	-0.175665	6.92407	10.9572	59	2	0.0502	0.048273	0.714	1	-0.125	-0.127392	0.286
rs41641297	23	24439671	PKHD1	55	retp	a	0.173889	7.0064	11.2156	55	1	0.053	0.052117	0.695	2	-0.121	-0.121772	0.305
rs110175462	23	24468262	PKHD1	79	retp	a	0.205219	6.66285	10.1573	79	1	0.0338	0.0333839	0.835	2	-0.171	-0.171835	0.165
rs110493343	23	24475407	PKHD1	68	retp	a	-0.168962	6.79518	10.5588	68	2	0.0526	0.0532302	0.689	1	-0.116	-0.115732	0.311
rs109550233	23	24571616	ENSBTAG00000050626	118	retp	a	0.197964	6.37629	9.3141	118	1	0.0326	0.0318006	0.835	2	-0.165	-0.166164	0.165
rs110641968	23	24895534	TRAM2	88	retp	a	-0.195569	6.57667	9.8999	88	2	0.0352	0.0338954	0.82	1	-0.16	-0.161674	0.18
rs137762108	23	25024407	LOC112443711;LOC112443751	30	retp	a	-0.19881	7.44749	12.65	30	2	0.0505	0.0527459	0.746	1	-0.148	-0.146064	0.254
rs135832378	23	25119540	LOC100138641;GSTA1	11	retp	a	0.185721	7.82619	13.9493	11	1	0.0725	0.0722692	0.609	2	-0.113	-0.113452	0.391
rs110144575	23	25142236	GSTA5	47	retp	a	0.217708	7.10743	11.5366	47	1	0.039	0.0475873	0.821	2	-0.179	-0.170121	0.179
rs110043199	23	25175265	LOC112443730	35	retp	a	0.219236	7.29311	12.1383	35	1	0.0394	0.0407045	0.82	2	-0.18	-0.178532	0.18
rs110020451	23	25207610	GSTA3	143	retp	a	-0.168573	6.23844	8.9213	143	2	0.13	0.128414	0.232	1	-0.0391	-0.0401591	0.768
rs134642076	23	25213223	GSTA4	182	retp	a	-0.163781	6.05302	8.4062	182	2	0.0398	0.0412569	0.757	1	-0.124	-0.122524	0.243
rs110473048	23	25354656	GCM1;ELOVL5	168	retp	a	0.156004	6.11008	8.5631	168	1	0.0434	0.0420351	0.722	2	-0.113	-0.113969	0.278
rs135727720	23	25381511	GCM1;ELOVL5	157	retp	a	0.168482	6.16853	8.7253	157	1	0.0389	0.0391937	0.769	2	-0.13	-0.129289	0.231
rs135146076	23	25491332	ELOVL5;BOLA-DQA2	9	retp	a	-0.190105	7.97651	14.4824	9	2	0.0674	0.0656746	0.645	1	-0.123	-0.12443	0.355
rs109782022	23	25560755	ELOVL5;BOLA-DQA2	189	retp	a	-0.161786	5.96459	8.1658	189	2	0.123	0.121818	0.239	1	-0.0387	-0.0399679	0.761
rs133177329	23	27122907	ENSBTAG00000048304	34	retp	a	0.171853	7.29529	12.1454	34	1	0.105	0.10512	0.388	2	-0.0667	-0.0667327	0.612
rs110358203	23	27231641	PPT2	8	retp	a	-0.192217	7.98442	14.5107	8	2	0.124	0.125344	0.353	1	-0.0679	-0.0668729	0.647
rs110222199	23	27432018	C2	77	retp	a	-0.155588	6.69437	10.2522	77	2	0.0661	0.0673048	0.575	1	-0.0895	-0.0882828	0.425
rs110930105	23	27765742	MCCD1;MGC126945	178	retp	a	-0.139157	6.06128	8.4288	178	2	0.0776	0.0771274	0.442	1	-0.0615	-0.0620299	0.558
rs110417103	23	28016941	ENSBTAG00000007075	65	retp	a	0.16147	6.8471	10.7184	65	1	0.0601	0.0588205	0.628	2	-0.101	-0.102649	0.372
rs110277462	23	28345983	DHX16	13	retp	a	0.18558	7.76021	13.7184	13	1	0.121	0.118362	0.351	2	-0.0651	-0.067218	0.649
rs3423504515	23	28367574	MRPS18B	7	retp	a	0.193107	8.05988	14.7823	7	1	0.126	0.124578	0.35	2	-0.0676	-0.0685288	0.65
rs41587547	23	28504980	ENSBTAG00000038619	91	retp	a	-0.176484	6.5501	9.8212	91	2	0.135	0.13389	0.234	1	-0.0412	-0.0425939	0.766
rs3423514031	23	28777609	LOC785873	19	retp	a	0.183299	7.6978	13.5018	19	1	0.115	0.115731	0.373	2	-0.0683	-0.0675678	0.627
rs3423494105	23	28783122	TRIM26	32	retp	a	0.193132	7.39762	12.4835	32	1	0.0508	0.0520195	0.737	2	-0.142	-0.141113	0.263
rs3423498878	23	31063056	TRNAF-GAA_18;TRNAI-UAU_6	44	retp	a	-0.164517	7.17445	11.752	44	2	0.0846	0.0852159	0.486	1	-0.0799	-0.0793012	0.514
rs134340934	23	31099542	TRNAK-UUU_38;TRNAL-CAA_9	54	retp	a	-0.160909	7.00883	11.2232	54	2	0.0833	0.0823703	0.482	1	-0.0776	-0.0785387	0.518
rs29014609	23	31647026	ENSBTAG00000054314	158	retp	a	0.14181	6.16793	8.7237	158	1	0.0802	0.0796526	0.435	2	-0.0616	-0.0621574	0.565
rs109821904	23	32057953	SLC17A1	4	retp	a	-0.195638	8.256	15.4997	4	2	0.125	0.1238	0.363	1	-0.0711	-0.0718384	0.637
rs134417252	23	32082163	SLC17A4	173	retp	a	0.139911	6.07686	8.4716	173	1	0.0744	0.0759271	0.468	2	-0.0655	-0.0639837	0.532
rs134698463	23	32498379	CARMIL1	22	retp	a	-0.177698	7.68679	13.4637	22	2	0.0863	0.0826997	0.514	1	-0.0914	-0.0949986	0.486
rs3423509404	23	33077628	ACOT13	16	retp	a	-0.176775	7.74002	13.6482	16	2	0.0854	0.0842748	0.517	1	-0.0914	-0.0924998	0.483
rs109516714	23	33248907	GPLD1	114	retp	a	-0.152524	6.38453	9.3379	114	2	0.0545	0.0503473	0.642	1	-0.098	-0.102176	0.358
rs134652434	23	33289210	MRS2	140	retp	a	-0.143179	6.24844	8.9496	140	2	0.079	0.0764329	0.448	1	-0.0642	-0.0667463	0.552
rs110667267	23	33502681	NRSN1	62	retp	a	0.181163	6.85931	10.7561	62	1	0.0449	0.0424571	0.752	2	-0.136	-0.138706	0.248
rs110718805	23	34501259	LOC780995	123	retp	a	-0.146347	6.35094	9.2413	123	2	0.0763	0.0712592	0.478	1	-0.07	-0.0750874	0.522
rs109996125	23	35474287	PRL;HDGFL1	112	retp	a	0.145801	6.38797	9.3478	112	1	0.0729	0.0715593	0.5	2	-0.073	-0.0742421	0.5
rs109375396	24	30381754	KCTD1	159	retp	a	-0.142372	6.1591	8.6991	159	2	0.0587	0.0574311	0.588	1	-0.0837	-0.0849413	0.412
rs110190049	24	30486009	KCTD1;TAF4B	37	retp	a	-0.166932	7.23543	11.9497	37	2	0.0703	0.0695436	0.579	1	-0.0966	-0.0973887	0.421
rs136103342	24	30564828	TAF4B	18	retp	a	-0.179163	7.69912	13.5064	18	2	0.0755	0.0732701	0.579	1	-0.104	-0.105893	0.421
rs207730478	24	30578431	TAF4B	33	retp	a	-0.170434	7.39434	12.4726	33	2	0.0718	0.0699121	0.579	1	-0.0987	-0.100521	0.421
rs43772736	24	30783746	SS18;TRNAC-GCA_235	15	retp	a	0.1777	7.75008	13.6831	15	1	0.0784	0.0769041	0.559	2	-0.0993	-0.100796	0.441
rs136562908	24	31014203	TRNAC-GCA_235;ZNF521	153	retp	a	-0.143068	6.19731	8.8058	153	2	0.0639	0.062947	0.554	1	-0.0792	-0.0801214	0.446
rs133478547	24	42802706	TUBB6	179	retp	a	-0.140841	6.05718	8.4176	179	2	0.059	0.0599396	0.581	1	-0.0818	-0.0809013	0.419
rs109283951	24	45240872	SLC14A2	119	retp	a	-0.147542	6.37179	9.3012	119	2	0.0625	0.0618797	0.576	1	-0.085	-0.0856623	0.424
rs136286766	24	45877982	HAUS1;LOC104975782	167	retp	a	0.143002	6.1381	8.6407	167	1	0.0651	0.0687346	0.545	2	-0.0779	-0.0742675	0.455
rs136005248	24	45884729	HAUS1;LOC104975782	170	retp	a	-0.14123	6.09225	8.5139	170	2	0.0642	0.0649861	0.545	1	-0.077	-0.0762441	0.455
rs133866392	24	47339132	SKOR2;LOC112444197	195	retp	a	-0.137492	5.94213	8.1053	195	2	0.0662	0.0705422	0.519	1	-0.0713	-0.0669499	0.481
rs109549267	25	20505246	HS3ST2	135	retp	a	0.146276	6.28032	9.0398	135	1	0.0725	0.0688444	0.505	2	-0.0738	-0.0774315	0.495
rs3423539448	29	50315786	MUC5AC;MUC2	174	retp	a	-0.213899	6.07168	8.4573	174	2	0.0273	0.0242108	0.873	1	-0.187	-0.189688	0.127
rs136268223	31	89068436	NUDT11;LOC112445076	75	retp	a	-0.18425	6.73081	10.3625	75	2	0.042	0.0414348	0.772	1	-0.142	-0.142815	0.228
rs133376988	31	89494444	MAGED1;MAGED4B	73	retp	a	0.29891	6.74594	10.4085	73	1	0.0217	0.0207355	0.927	2	-0.277	-0.278174	0.0726
rs137683400	31	89839370	LOC100297099	117	retp	a	-0.226259	6.37714	9.3166	117	2	0.0265	0.0251811	0.883	1	-0.2	-0.201078	0.117
‘effect’ is the additive effect of the SNP as the difference between allelic effects of ‘allele 1’ and ‘allele 2’ (Equation 7).
‘ae+’ is the allelic effect of the positive allele using Equation 6, and 'ae+2' the allelic effect of the positive allele using Equation 8
‘ae-’ is the allelic effect of the negative allele using Equation 6, and 'ae-2' is the allelic effect of the negative allele using Equation 8.
‘f_al+’ is the frequency of the positive allele. ‘f_al-’ is the requency of the negative allele.
