# Supplementary material for: Large-Sample Genome-Wide Association Study of Resistance to Retained Placenta in U.S. Holstein Cows
Source: Int J Mol Sci. 2024 May 20;25(10):5551. doi: 10.3390/ijms25105551 (PMC11122073; doi:10.3390/ijms25105551)
Supplement: Supplementary file 1 [file ijms-25-05551-s001.zip › Table_S2.xlsx]

## Sheet: Sheet6
Table S2: Gene names of candidate genes described in the main text.
Chr	Gene symbol	Gene name
5	ATP2B1	ATPase plasma membrane Ca2+ transporting 1
5	C5H12orf50	chromosome 5 C12orf50 homolog
5	CALCOCO1	calcium binding and coiled-coil domain 1
5	CEP290	centrosomal protein 290
5	HIGD1C	HIG1 hypoxia inducible domain family member 1C
5	KITLG	KIT ligand
5	KRT18	keratin 18
5	KRT8	keratin 8
5	POC1B	POC1 centriolar protein B
6	GC	GC vitamin D binding protein
6	NPFFR2	neuropeptide FF receptor 2
6	SLC4A4	solute carrier family 4 member 4
7	OR7A5	olfactory receptor family 7 subfamily A member 5
9	AKAP12	A-kinase anchoring protein 12
9	CCDC170	coiled-coil domain containing 170
9	ESR1	estrogen receptor 1
9	MAP3K4	mitogen-activated protein kinase kinase kinase 4
9	MTHFD1L	methylenetetrahydrofolate dehydrogenase (NADP+ dependent) 1 like
9	PLEKHG1	pleckstrin homology and RhoGEF domain containing G1
9	RMND1	required for meiotic nuclear division 1 homolog
10	LIPC	lipase C, hepatic type
10	RASGRP1	RAS guanyl releasing protein 1
15	IL10RA	interleukin 10 receptor subunit alpha
15	SLC1A2	solute carrier family 1 member 2
15	SPON1	spondin 1
17	ANAPC10	anaphase promoting complex subunit 10
17	EDNRA	endothelin receptor type A
17	HHIP	Hedgehog-interacting protein
17	IL15	interleukin 15
17	TBC1D9	TBC1 domain family, member 9
17	ZNF330	zinc finger protein 330
19	ABCA10	ATP binding cassette subfamily A member 10
19	ABCA9	ATP binding cassette subfamily A member 9
23	ACOT13	acyl-CoA thioesterase 13
23	BOLA-DQA2	major histocompatibility complex, class II, DQ alpha 2
23	CARMIL1	capping protein regulator and myosin 1 linker 1
23	DHX16	DEAH-box helicase 16
23	ELOVL5	ELOVL fatty acid elongase 5
23	GCM1	glial cells missing transcription factor 1
23	GSTA1	glutathione S-transferase alpha 1
23	GSTA5	glutathione S-transferase alpha 5
23	MRPS18B	mitochondrial ribosomal protein S18B
23	PKHD1	polycystic kidney and hepatic disease 1
23	PPT2	palmitoyl-protein thioesterase 2
23	SLC17A1	solute carrier family 17 member 1
23	TRIM26	tripartite motif containing 26
24	KCTD1	potassium channel tetramerization domain containing 1
24	SS18	SS18 subunit of BAF chromatin remodeling complex
24	TAF4B	TATA-box binding protein associated factor 4b
31	MAGED1	MAGE family member D1
31	MAGED4B	MAGE family member D4B
31	NUDT11	nudix hydrolase 11
