# Supplementary material for: Large-Sample Genome-Wide Association Study of Resistance to Retained Placenta in U.S. Holstein Cows
Source: Int J Mol Sci. 2024 May 20;25(10):5551. doi: 10.3390/ijms25105551 (PMC11122073; doi:10.3390/ijms25105551)
Supplement: Supplementary file 1 [file ijms-25-05551-s001.zip › Table_S3.xlsx]

## Sheet: out.P
Table S3: Results of gene ontology (GO) analysis of candidate genes for 200 significant additive effects.
GO ID	Description of GO ID	out (125)	All (17023)	pvalue	p.adjust	Genes	Gene_Symbol
GO:0007189	adenylate cyclase-activating G protein-coupled receptor signaling pathway	1	110	0.55662	0.711788	ENSBTAG00000013848	ADGRD1
GO:0010739	positive regulation of protein kinase A signaling	1	7	0.0502912	0.361821	ENSBTAG00000014788	AKAP12
GO:0010738	regulation of protein kinase A signaling	1	12	0.0846693	0.400616	ENSBTAG00000014788	AKAP12
GO:0090036	regulation of protein kinase C signaling	1	12	0.0846693	0.400616	ENSBTAG00000014788	AKAP12
GO:0070528	protein kinase C signaling	1	26	0.174498	0.4775	ENSBTAG00000014788	AKAP12
GO:0050804	modulation of chemical synaptic transmission	1	275	0.870403	0.9096	ENSBTAG00000014788	AKAP12
GO:0099177	regulation of trans-synaptic signaling	1	276	0.871371	0.910209	ENSBTAG00000014788	AKAP12
GO:0031145	anaphase-promoting complex-dependent catabolic process	1	16	0.111281	0.422795	ENSBTAG00000013326	ANAPC10
GO:0043161	proteasome-mediated ubiquitin-dependent protein catabolic process	1	338	0.919232	0.940237	ENSBTAG00000013326	ANAPC10
GO:0065009	regulation of molecular function	17	2175	0.430744	0.647758	ENSBTAG00000002531;ENSBTAG00000007047;ENSBTAG00000007159;ENSBTAG00000009070;ENSBTAG00000009150;ENSBTAG00000009679;ENSBTAG00000011237;ENSBTAG00000013674;ENSBTAG00000014253;ENSBTAG00000014272;ENSBTAG00000017549;ENSBTAG00000018951;ENSBTAG00000020079;ENSBTAG00000021343;ENSBTAG00000021872;ENSBTAG00000035744;ENSBTAG00000039916	ARHGAP10;FZD10;ESR1;NPFFR2;SPON1;PLEKHG1;PKHD1;EDNRA;TBC1D22B;MMUT;KITLG;TBC1D9;MAP3K4;ARHGEF12;RASGRP1;TRIM26;SMAD2
GO:0050790	regulation of catalytic activity	11	1644	0.672034	0.777084	ENSBTAG00000002531;ENSBTAG00000007047;ENSBTAG00000009070;ENSBTAG00000009679;ENSBTAG00000014253;ENSBTAG00000014272;ENSBTAG00000017549;ENSBTAG00000018951;ENSBTAG00000020079;ENSBTAG00000021343;ENSBTAG00000021872	ARHGAP10;FZD10;NPFFR2;PLEKHG1;TBC1D22B;MMUT;KITLG;TBC1D9;MAP3K4;ARHGEF12;RASGRP1
GO:0007266	Rho protein signal transduction	1	99	0.518937	0.688522	ENSBTAG00000021343	ARHGEF12
GO:0006357	regulation of transcription by RNA polymerase II	14	1940	0.569706	0.717284	ENSBTAG00000002728;ENSBTAG00000002835;ENSBTAG00000003399;ENSBTAG00000003505;ENSBTAG00000004257;ENSBTAG00000004647;ENSBTAG00000007159;ENSBTAG00000008148;ENSBTAG00000011373;ENSBTAG00000011531;ENSBTAG00000015016;ENSBTAG00000020426;ENSBTAG00000031917;ENSBTAG00000039916	ARID1B;SMAD1;SMARCA5;DCN;TAF4B;UCP1;ESR1;GCM1;MAML3;SS18;CALCOCO1;TFAP2B;SCAF8;SMAD2
GO:0006366	transcription by RNA polymerase II	14	2021	0.6335	0.759603	ENSBTAG00000002728;ENSBTAG00000002835;ENSBTAG00000003399;ENSBTAG00000003505;ENSBTAG00000004257;ENSBTAG00000004647;ENSBTAG00000007159;ENSBTAG00000008148;ENSBTAG00000011373;ENSBTAG00000011531;ENSBTAG00000015016;ENSBTAG00000020426;ENSBTAG00000031917;ENSBTAG00000039916	ARID1B;SMAD1;SMARCA5;DCN;TAF4B;UCP1;ESR1;GCM1;MAML3;SS18;CALCOCO1;TFAP2B;SCAF8;SMAD2
GO:0006325	chromatin organization	5	438	0.219896	0.513438	ENSBTAG00000002728;ENSBTAG00000003399;ENSBTAG00000003581;ENSBTAG00000006468;ENSBTAG00000012738	ARID1B;SMARCA5;SETD7;PIWIL1;ZNF827
GO:0051276	chromosome organization	6	795	0.531708	0.697785	ENSBTAG00000002728;ENSBTAG00000003399;ENSBTAG00000003581;ENSBTAG00000006468;ENSBTAG00000012738;ENSBTAG00000020079	ARID1B;SMARCA5;SETD7;PIWIL1;ZNF827;MAP3K4
GO:0006338	chromatin remodeling	3	295	0.36874	0.613128	ENSBTAG00000002728;ENSBTAG00000003399;ENSBTAG00000012738	ARID1B;SMARCA5;ZNF827
GO:2001020	regulation of response to DNA damage stimulus	2	215	0.470058	0.660244	ENSBTAG00000004098;ENSBTAG00000014490	ARMT1;DDX39B
GO:0080135	regulation of cellular response to stress	4	523	0.538021	0.700492	ENSBTAG00000004098;ENSBTAG00000014490;ENSBTAG00000020079;ENSBTAG00000021872	ARMT1;DDX39B;MAP3K4;RASGRP1
GO:0018120	peptidyl-arginine ADP-ribosylation	2	12	0.00336441	0.320696	ENSBTAG00000006345;ENSBTAG00000048692	ART1;ENSBTAG00000048692
GO:0018195	peptidyl-arginine modification	2	30	0.020347	0.334809	ENSBTAG00000006345;ENSBTAG00000048692	ART1;ENSBTAG00000048692
GO:0006471	protein ADP-ribosylation	2	38	0.0316586	0.345405	ENSBTAG00000006345;ENSBTAG00000048692	ART1;ENSBTAG00000048692
GO:0051481	negative regulation of cytosolic calcium ion concentration	1	6	0.0432634	0.3507	ENSBTAG00000009552	ATP2B1
GO:0099509	regulation of presynaptic cytosolic calcium ion concentration	1	6	0.0432634	0.3507	ENSBTAG00000009552	ATP2B1
GO:1990034	calcium ion export across plasma membrane	1	7	0.0502912	0.361821	ENSBTAG00000009552	ATP2B1
GO:0003056	regulation of vascular associated smooth muscle contraction	1	8	0.0572677	0.364984	ENSBTAG00000009552	ATP2B1
GO:1901660	calcium ion export	1	10	0.0710688	0.376331	ENSBTAG00000009552	ATP2B1
GO:0070050	neuron cellular homeostasis	1	24	0.162222	0.470564	ENSBTAG00000009552	ATP2B1
GO:0030501	positive regulation of bone mineralization	1	32	0.210266	0.509416	ENSBTAG00000009552	ATP2B1
GO:0006940	regulation of smooth muscle contraction	1	33	0.216076	0.513438	ENSBTAG00000009552	ATP2B1
GO:0019229	regulation of vasoconstriction	1	34	0.221843	0.513438	ENSBTAG00000009552	ATP2B1
GO:0045778	positive regulation of ossification	1	40	0.255575	0.536776	ENSBTAG00000009552	ATP2B1
GO:0070169	positive regulation of biomineral tissue development	1	40	0.255575	0.536776	ENSBTAG00000009552	ATP2B1
GO:0110151	positive regulation of biomineralization	1	41	0.261054	0.537786	ENSBTAG00000009552	ATP2B1
GO:0030500	regulation of bone mineralization	1	60	0.357878	0.602059	ENSBTAG00000009552	ATP2B1
GO:0051928	positive regulation of calcium ion transport	1	61	0.36261	0.606342	ENSBTAG00000009552	ATP2B1
GO:0070167	regulation of biomineral tissue development	1	72	0.412431	0.638472	ENSBTAG00000009552	ATP2B1
GO:0110149	regulation of biomineralization	1	74	0.421065	0.643837	ENSBTAG00000009552	ATP2B1
GO:0030278	regulation of ossification	1	91	0.489551	0.673066	ENSBTAG00000009552	ATP2B1
GO:0006937	regulation of muscle contraction	1	92	0.49332	0.674964	ENSBTAG00000009552	ATP2B1
GO:0090257	regulation of muscle system process	1	125	0.603328	0.736883	ENSBTAG00000009552	ATP2B1
GO:0060401	cytosolic calcium ion transport	1	131	0.620614	0.75102	ENSBTAG00000009552	ATP2B1
GO:0051924	regulation of calcium ion transport	1	137	0.637153	0.760919	ENSBTAG00000009552	ATP2B1
GO:0051480	regulation of cytosolic calcium ion concentration	1	193	0.760821	0.834505	ENSBTAG00000009552	ATP2B1
GO:0010959	regulation of metal ion transport	1	230	0.818531	0.872338	ENSBTAG00000009552	ATP2B1
GO:0014829	vascular associated smooth muscle contraction	2	18	0.00757813	0.320696	ENSBTAG00000009552;ENSBTAG00000013674	ATP2B1;EDNRA
GO:0042310	vasoconstriction	2	50	0.0521323	0.364984	ENSBTAG00000009552;ENSBTAG00000013674	ATP2B1;EDNRA
GO:0006939	smooth muscle contraction	2	64	0.0803579	0.397092	ENSBTAG00000009552;ENSBTAG00000013674	ATP2B1;EDNRA
GO:0035296	regulation of tube diameter	2	82	0.121791	0.437164	ENSBTAG00000009552;ENSBTAG00000013674	ATP2B1;EDNRA
GO:0097746	blood vessel diameter maintenance	2	82	0.121791	0.437164	ENSBTAG00000009552;ENSBTAG00000013674	ATP2B1;EDNRA
GO:0035150	regulation of tube size	2	83	0.124225	0.437164	ENSBTAG00000009552;ENSBTAG00000013674	ATP2B1;EDNRA
GO:0008217	regulation of blood pressure	2	106	0.182898	0.48588	ENSBTAG00000009552;ENSBTAG00000013674	ATP2B1;EDNRA
GO:0043270	positive regulation of ion transport	2	139	0.271892	0.544016	ENSBTAG00000009552;ENSBTAG00000013674	ATP2B1;EDNRA
GO:1903522	regulation of blood circulation	2	144	0.285496	0.557566	ENSBTAG00000009552;ENSBTAG00000013674	ATP2B1;EDNRA
GO:0006936	muscle contraction	2	197	0.42557	0.645307	ENSBTAG00000009552;ENSBTAG00000013674	ATP2B1;EDNRA
GO:0070588	calcium ion transmembrane transport	2	226	0.496227	0.677341	ENSBTAG00000009552;ENSBTAG00000013674	ATP2B1;EDNRA
GO:0003012	muscle system process	2	241	0.530577	0.697709	ENSBTAG00000009552;ENSBTAG00000013674	ATP2B1;EDNRA
GO:0006816	calcium ion transport	2	290	0.631408	0.758266	ENSBTAG00000009552;ENSBTAG00000013674	ATP2B1;EDNRA
GO:0008015	blood circulation	2	298	0.646188	0.766528	ENSBTAG00000009552;ENSBTAG00000013674	ATP2B1;EDNRA
GO:0044057	regulation of system process	2	313	0.672643	0.777084	ENSBTAG00000009552;ENSBTAG00000013674	ATP2B1;EDNRA
GO:0043269	regulation of ion transport	2	402	0.798232	0.859196	ENSBTAG00000009552;ENSBTAG00000013674	ATP2B1;EDNRA
GO:0090066	regulation of anatomical structure size	3	380	0.531059	0.697785	ENSBTAG00000009552;ENSBTAG00000013674;ENSBTAG00000016549	ATP2B1;EDNRA;CARMIL1
GO:0006874	cellular calcium ion homeostasis	4	273	0.141574	0.456453	ENSBTAG00000009552;ENSBTAG00000011237;ENSBTAG00000013674;ENSBTAG00000034522	ATP2B1;PKHD1;EDNRA;SLC10A7
GO:0072503	cellular divalent inorganic cation homeostasis	4	297	0.174875	0.477977	ENSBTAG00000009552;ENSBTAG00000011237;ENSBTAG00000013674;ENSBTAG00000034522	ATP2B1;PKHD1;EDNRA;SLC10A7
GO:0006875	cellular metal ion homeostasis	5	383	0.151423	0.461283	ENSBTAG00000009552;ENSBTAG00000011237;ENSBTAG00000013674;ENSBTAG00000034522;ENSBTAG00000038430	ATP2B1;PKHD1;EDNRA;SLC10A7;ENSBTAG00000038430
GO:0055074	calcium ion homeostasis	5	291	0.0634895	0.369698	ENSBTAG00000009552;ENSBTAG00000011237;ENSBTAG00000013674;ENSBTAG00000020426;ENSBTAG00000034522	ATP2B1;PKHD1;EDNRA;TFAP2B;SLC10A7
GO:0072507	divalent inorganic cation homeostasis	5	323	0.0896964	0.400616	ENSBTAG00000009552;ENSBTAG00000011237;ENSBTAG00000013674;ENSBTAG00000020426;ENSBTAG00000034522	ATP2B1;PKHD1;EDNRA;TFAP2B;SLC10A7
GO:0055065	metal ion homeostasis	6	443	0.108053	0.421353	ENSBTAG00000009552;ENSBTAG00000011237;ENSBTAG00000013674;ENSBTAG00000020426;ENSBTAG00000034522;ENSBTAG00000038430	ATP2B1;PKHD1;EDNRA;TFAP2B;SLC10A7;ENSBTAG00000038430
GO:0003018	vascular process in circulatory system	3	119	0.0573215	0.364984	ENSBTAG00000009552;ENSBTAG00000012628;ENSBTAG00000013674	ATP2B1;SLC1A2;EDNRA
GO:0003013	circulatory system process	3	319	0.416346	0.640987	ENSBTAG00000009552;ENSBTAG00000012628;ENSBTAG00000013674	ATP2B1;SLC1A2;EDNRA
GO:0003008	system process	8	2092	0.989743	0.991838	ENSBTAG00000009552;ENSBTAG00000012628;ENSBTAG00000013674;ENSBTAG00000020426;ENSBTAG00000046378;ENSBTAG00000051946;ENSBTAG00000052183;ENSBTAG00000052809	ATP2B1;SLC1A2;EDNRA;TFAP2B;OR52A5EP;ENSBTAG00000051946;OR52S6;OR52A1E
GO:0045930	negative regulation of mitotic cell cycle	1	167	0.709708	0.799182	ENSBTAG00000020330	BTG1
GO:0007346	regulation of mitotic cell cycle	1	352	0.927306	0.944665	ENSBTAG00000020330	BTG1
GO:2000427	positive regulation of apoptotic cell clearance	1	3	0.0218689	0.334809	ENSBTAG00000007450	C2
GO:2000425	regulation of apoptotic cell clearance	1	4	0.0290526	0.334809	ENSBTAG00000007450	C2
GO:0043277	apoptotic cell clearance	1	34	0.221843	0.513438	ENSBTAG00000007450	C2
GO:0006958	complement activation, classical pathway	1	45	0.282574	0.554083	ENSBTAG00000007450	C2
GO:0002455	humoral immune response mediated by circulating immunoglobulin	1	57	0.343473	0.594528	ENSBTAG00000007450	C2
GO:0006956	complement activation	1	70	0.403669	0.631934	ENSBTAG00000007450	C2
GO:0016064	immunoglobulin mediated immune response	1	114	0.569584	0.717284	ENSBTAG00000007450	C2
GO:0019724	B cell mediated immunity	1	114	0.569584	0.717284	ENSBTAG00000007450	C2
GO:0006959	humoral immune response	1	184	0.744228	0.822019	ENSBTAG00000007450	C2
GO:0002460	adaptive immune response based on somatic recombination of immune receptors built from immunoglobulin superfamily domains	1	224	0.810213	0.867307	ENSBTAG00000007450	C2
GO:0002250	adaptive immune response	1	301	0.893356	0.924201	ENSBTAG00000007450	C2
GO:0050766	positive regulation of phagocytosis	2	47	0.0466574	0.361821	ENSBTAG00000007450;ENSBTAG00000018200	C2;IL15
GO:0050764	regulation of phagocytosis	2	66	0.0847078	0.400616	ENSBTAG00000007450;ENSBTAG00000018200	C2;IL15
GO:0006909	phagocytosis	2	170	0.35552	0.602059	ENSBTAG00000007450;ENSBTAG00000018200	C2;IL15
GO:0060627	regulation of vesicle-mediated transport	2	357	0.741129	0.820511	ENSBTAG00000007450;ENSBTAG00000018200	C2;IL15
GO:0016973	poly(A)+ mRNA export from nucleus	1	14	0.0980723	0.405515	ENSBTAG00000018180	C5H12orf50
GO:0042271	susceptibility to natural killer cell mediated cytotoxicity	1	2	0.0146325	0.320696	ENSBTAG00000000977	CADM1
GO:0008037	cell recognition	1	113	0.566378	0.715378	ENSBTAG00000000977	CADM1
GO:0080134	regulation of response to stress	8	962	0.411061	0.638472	ENSBTAG00000000977;ENSBTAG00000004098;ENSBTAG00000007159;ENSBTAG00000014490;ENSBTAG00000018200;ENSBTAG00000020079;ENSBTAG00000021872;ENSBTAG00000037389	CADM1;ARMT1;ESR1;DDX39B;IL15;MAP3K4;RASGRP1;TRIM44
GO:0098542	defense response to other organism	6	753	0.478448	0.665317	ENSBTAG00000000977;ENSBTAG00000007450;ENSBTAG00000018200;ENSBTAG00000021872;ENSBTAG00000035744;ENSBTAG00000037389	CADM1;C2;IL15;RASGRP1;TRIM26;TRIM44
GO:0002449	lymphocyte mediated immunity	3	221	0.221527	0.513438	ENSBTAG00000000977;ENSBTAG00000007450;ENSBTAG00000021872	CADM1;C2;RASGRP1
GO:0002443	leukocyte mediated immunity	3	275	0.328593	0.582093	ENSBTAG00000000977;ENSBTAG00000007450;ENSBTAG00000021872	CADM1;C2;RASGRP1
GO:0002252	immune effector process	3	464	0.666367	0.775559	ENSBTAG00000000977;ENSBTAG00000007450;ENSBTAG00000021872	CADM1;C2;RASGRP1
GO:0045087	innate immune response	4	497	0.497767	0.677915	ENSBTAG00000000977;ENSBTAG00000007450;ENSBTAG00000021872;ENSBTAG00000035744	CADM1;C2;RASGRP1;TRIM26
GO:0031347	regulation of defense response	5	410	0.183838	0.486805	ENSBTAG00000000977;ENSBTAG00000007159;ENSBTAG00000018200;ENSBTAG00000021872;ENSBTAG00000037389	CADM1;ESR1;IL15;RASGRP1;TRIM44
GO:0032101	regulation of response to external stimulus	5	660	0.535727	0.699208	ENSBTAG00000000977;ENSBTAG00000007159;ENSBTAG00000018200;ENSBTAG00000021872;ENSBTAG00000037389	CADM1;ESR1;IL15;RASGRP1;TRIM44
GO:0050778	positive regulation of immune response	6	400	0.0746144	0.388915	ENSBTAG00000000977;ENSBTAG00000004982;ENSBTAG00000007450;ENSBTAG00000018200;ENSBTAG00000021872;ENSBTAG00000048304	CADM1;GPLD1;C2;IL15;RASGRP1;ENSBTAG00000048304
GO:0002684	positive regulation of immune system process	7	669	0.22135	0.513438	ENSBTAG00000000977;ENSBTAG00000004982;ENSBTAG00000007450;ENSBTAG00000017549;ENSBTAG00000018200;ENSBTAG00000021872;ENSBTAG00000048304	CADM1;GPLD1;C2;KITLG;IL15;RASGRP1;ENSBTAG00000048304
GO:0001819	positive regulation of cytokine production	3	326	0.430034	0.647513	ENSBTAG00000000977;ENSBTAG00000018200;ENSBTAG00000021872	CADM1;IL15;RASGRP1
GO:0002831	regulation of response to biotic stimulus	4	237	0.0972201	0.405515	ENSBTAG00000000977;ENSBTAG00000018200;ENSBTAG00000021872;ENSBTAG00000037389	CADM1;IL15;RASGRP1;TRIM44
GO:0060255	regulation of macromolecule metabolic process	39	4953	0.332886	0.585506	ENSBTAG00000000977;ENSBTAG00000002606;ENSBTAG00000002728;ENSBTAG00000002835;ENSBTAG00000003399;ENSBTAG00000003505;ENSBTAG00000003581;ENSBTAG00000004257;ENSBTAG00000004647;ENSBTAG00000004982;ENSBTAG00000006468;ENSBTAG00000007047;ENSBTAG00000007159;ENSBTAG00000008148;ENSBTAG00000008733;ENSBTAG00000009023;ENSBTAG00000009070;ENSBTAG00000009150;ENSBTAG00000009552;ENSBTAG00000011237;ENSBTAG00000011373;…	CADM1;LGR4;ARID1B;SMAD1;SMARCA5;DCN;SETD7;TAF4B;UCP1;GPLD1;PIWIL1;FZD10;ESR1;GCM1;MAGED1;TMTC3;NPFFR2;SPON1;ATP2B1;PKHD1;MAML3;SS18;ZNF827;RMND1;DDX39B;CALCOCO1;KITLG;IL15;MAP3K4;TFAP2B;PRR5L;RASGRP1;SCAF8;TRIM26;TRIM44;SMAD2;LDLRAD3;ENSBTAG00000048304;KCTD1
GO:0010468	regulation of gene expression	34	3834	0.126303	0.441595	ENSBTAG00000000977;ENSBTAG00000002606;ENSBTAG00000002728;ENSBTAG00000002835;ENSBTAG00000003399;ENSBTAG00000003505;ENSBTAG00000003581;ENSBTAG00000004257;ENSBTAG00000004647;ENSBTAG00000006468;ENSBTAG00000007159;ENSBTAG00000008148;ENSBTAG00000008733;ENSBTAG00000009150;ENSBTAG00000009552;ENSBTAG00000011237;ENSBTAG00000011373;ENSBTAG00000011531;ENSBTAG00000012738;ENSBTAG00000013224;ENSBTAG00000014490;…	CADM1;LGR4;ARID1B;SMAD1;SMARCA5;DCN;SETD7;TAF4B;UCP1;PIWIL1;ESR1;GCM1;MAGED1;SPON1;ATP2B1;PKHD1;MAML3;SS18;ZNF827;RMND1;DDX39B;CALCOCO1;IL15;MAP3K4;TFAP2B;PRR5L;RASGRP1;SCAF8;TRIM26;TRIM44;SMAD2;LDLRAD3;ENSBTAG00000048304;KCTD1
GO:0010467	gene expression	40	5003	0.289911	0.560393	ENSBTAG00000000977;ENSBTAG00000002606;ENSBTAG00000002728;ENSBTAG00000002835;ENSBTAG00000003399;ENSBTAG00000003505;ENSBTAG00000003581;ENSBTAG00000004257;ENSBTAG00000004647;ENSBTAG00000006468;ENSBTAG00000006936;ENSBTAG00000006960;ENSBTAG00000007159;ENSBTAG00000008148;ENSBTAG00000008733;ENSBTAG00000009150;ENSBTAG00000009552;ENSBTAG00000011237;ENSBTAG00000011373;ENSBTAG00000011531;ENSBTAG00000012738;…	CADM1;LGR4;ARID1B;SMAD1;SMARCA5;DCN;SETD7;TAF4B;UCP1;PIWIL1;MRPS18B;DHX16;ESR1;GCM1;MAGED1;SPON1;ATP2B1;PKHD1;MAML3;SS18;ZNF827;RMND1;EDNRA;LSM6;DDX39B;CALCOCO1;PRPF40B;C5H12orf50;IL15;MAP3K4;TFAP2B;PRR5L;RASGRP1;SCAF8;TRIM26;TRIM44;SMAD2;LDLRAD3;ENSBTAG00000048304;KCTD1
GO:0010604	positive regulation of macromolecule metabolic process	27	2691	0.0528155	0.364984	ENSBTAG00000000977;ENSBTAG00000002606;ENSBTAG00000002728;ENSBTAG00000002835;ENSBTAG00000003399;ENSBTAG00000003505;ENSBTAG00000004257;ENSBTAG00000004982;ENSBTAG00000007047;ENSBTAG00000007159;ENSBTAG00000008148;ENSBTAG00000009023;ENSBTAG00000009150;ENSBTAG00000011373;ENSBTAG00000011531;ENSBTAG00000013224;ENSBTAG00000014490;ENSBTAG00000015016;ENSBTAG00000017549;ENSBTAG00000018200;ENSBTAG00000020079;…	CADM1;LGR4;ARID1B;SMAD1;SMARCA5;DCN;TAF4B;GPLD1;FZD10;ESR1;GCM1;TMTC3;SPON1;MAML3;SS18;RMND1;DDX39B;CALCOCO1;KITLG;IL15;MAP3K4;TFAP2B;PRR5L;RASGRP1;SCAF8;TRIM44;SMAD2
GO:0001817	regulation of cytokine production	6	509	0.171822	0.4775	ENSBTAG00000000977;ENSBTAG00000002606;ENSBTAG00000009552;ENSBTAG00000018200;ENSBTAG00000021872;ENSBTAG00000048304	CADM1;LGR4;ATP2B1;IL15;RASGRP1;ENSBTAG00000048304
GO:0001816	cytokine production	6	516	0.179369	0.480233	ENSBTAG00000000977;ENSBTAG00000002606;ENSBTAG00000009552;ENSBTAG00000018200;ENSBTAG00000021872;ENSBTAG00000048304	CADM1;LGR4;ATP2B1;IL15;RASGRP1;ENSBTAG00000048304
GO:0048583	regulation of response to stimulus	26	2938	0.174451	0.4775	ENSBTAG00000000977;ENSBTAG00000002606;ENSBTAG00000003505;ENSBTAG00000004098;ENSBTAG00000004982;ENSBTAG00000005206;ENSBTAG00000005215;ENSBTAG00000007047;ENSBTAG00000007159;ENSBTAG00000007450;ENSBTAG00000009070;ENSBTAG00000009552;ENSBTAG00000011237;ENSBTAG00000013541;ENSBTAG00000014490;ENSBTAG00000014788;ENSBTAG00000016071;ENSBTAG00000017549;ENSBTAG00000018200;ENSBTAG00000020079;ENSBTAG00000020426;…	CADM1;LGR4;DCN;ARMT1;GPLD1;TMEM14A;IL10RA;FZD10;ESR1;C2;NPFFR2;ATP2B1;PKHD1;LMO3;DDX39B;AKAP12;HHIP;KITLG;IL15;MAP3K4;TFAP2B;PRR5L;RASGRP1;TRIM44;SMAD2;ENSBTAG00000048304
GO:0048584	positive regulation of response to stimulus	17	1584	0.0716897	0.378143	ENSBTAG00000000977;ENSBTAG00000002606;ENSBTAG00000003505;ENSBTAG00000004982;ENSBTAG00000005215;ENSBTAG00000007047;ENSBTAG00000007450;ENSBTAG00000013541;ENSBTAG00000014788;ENSBTAG00000017549;ENSBTAG00000018200;ENSBTAG00000020079;ENSBTAG00000021029;ENSBTAG00000021872;ENSBTAG00000037389;ENSBTAG00000039916;ENSBTAG00000048304	CADM1;LGR4;DCN;GPLD1;IL10RA;FZD10;C2;LMO3;AKAP12;KITLG;IL15;MAP3K4;PRR5L;RASGRP1;TRIM44;SMAD2;ENSBTAG00000048304
GO:0002376	immune system process	14	2109	0.697313	0.792386	ENSBTAG00000000977;ENSBTAG00000002606;ENSBTAG00000004982;ENSBTAG00000007075;ENSBTAG00000007159;ENSBTAG00000007450;ENSBTAG00000009656;ENSBTAG00000017549;ENSBTAG00000018200;ENSBTAG00000021872;ENSBTAG00000035744;ENSBTAG00000037389;ENSBTAG00000038619;ENSBTAG00000048304	CADM1;LGR4;GPLD1;ENSBTAG00000007075;ESR1;C2;ENSBTAG00000009656;KITLG;IL15;RASGRP1;TRIM26;TRIM44;ENSBTAG00000038619;ENSBTAG00000048304
GO:0006955	immune response	11	1372	0.426617	0.646067	ENSBTAG00000000977;ENSBTAG00000002606;ENSBTAG00000004982;ENSBTAG00000007159;ENSBTAG00000007450;ENSBTAG00000009656;ENSBTAG00000018200;ENSBTAG00000021872;ENSBTAG00000035744;ENSBTAG00000037389;ENSBTAG00000048304	CADM1;LGR4;GPLD1;ESR1;C2;ENSBTAG00000009656;IL15;RASGRP1;TRIM26;TRIM44;ENSBTAG00000048304
GO:0050776	regulation of immune response	9	652	0.0508951	0.364346	ENSBTAG00000000977;ENSBTAG00000002606;ENSBTAG00000004982;ENSBTAG00000007159;ENSBTAG00000007450;ENSBTAG00000018200;ENSBTAG00000021872;ENSBTAG00000037389;ENSBTAG00000048304	CADM1;LGR4;GPLD1;ESR1;C2;IL15;RASGRP1;TRIM44;ENSBTAG00000048304
GO:0002682	regulation of immune system process	10	1100	0.288572	0.558504	ENSBTAG00000000977;ENSBTAG00000002606;ENSBTAG00000004982;ENSBTAG00000007159;ENSBTAG00000007450;ENSBTAG00000017549;ENSBTAG00000018200;ENSBTAG00000021872;ENSBTAG00000037389;ENSBTAG00000048304	CADM1;LGR4;GPLD1;ESR1;C2;KITLG;IL15;RASGRP1;TRIM44;ENSBTAG00000048304
GO:0051239	regulation of multicellular organismal process	15	1924	0.443839	0.650369	ENSBTAG00000000977;ENSBTAG00000002606;ENSBTAG00000002835;ENSBTAG00000003505;ENSBTAG00000004647;ENSBTAG00000004982;ENSBTAG00000007159;ENSBTAG00000009552;ENSBTAG00000011914;ENSBTAG00000013674;ENSBTAG00000017549;ENSBTAG00000018200;ENSBTAG00000021872;ENSBTAG00000039916;ENSBTAG00000048304	CADM1;LGR4;SMAD1;DCN;UCP1;GPLD1;ESR1;ATP2B1;RASSF10;EDNRA;KITLG;IL15;RASGRP1;SMAD2;ENSBTAG00000048304
GO:0051240	positive regulation of multicellular organismal process	10	1006	0.204526	0.506393	ENSBTAG00000000977;ENSBTAG00000002606;ENSBTAG00000002835;ENSBTAG00000004647;ENSBTAG00000009552;ENSBTAG00000011914;ENSBTAG00000017549;ENSBTAG00000018200;ENSBTAG00000021872;ENSBTAG00000039916	CADM1;LGR4;SMAD1;UCP1;ATP2B1;RASSF10;KITLG;IL15;RASGRP1;SMAD2
GO:0051606	detection of stimulus	6	1076	0.809485	0.866991	ENSBTAG00000000977;ENSBTAG00000013551;ENSBTAG00000046378;ENSBTAG00000051946;ENSBTAG00000052183;ENSBTAG00000052809	CADM1;NOX3;OR52A5EP;ENSBTAG00000051946;OR52S6;OR52A1E
GO:0002717	positive regulation of natural killer cell mediated immunity	2	27	0.0166539	0.334809	ENSBTAG00000000977;ENSBTAG00000021872	CADM1;RASGRP1
GO:0045954	positive regulation of natural killer cell mediated cytotoxicity	2	27	0.0166539	0.334809	ENSBTAG00000000977;ENSBTAG00000021872	CADM1;RASGRP1
GO:0042269	regulation of natural killer cell mediated cytotoxicity	2	32	0.0229809	0.334809	ENSBTAG00000000977;ENSBTAG00000021872	CADM1;RASGRP1
GO:0002715	regulation of natural killer cell mediated immunity	2	33	0.0243477	0.334809	ENSBTAG00000000977;ENSBTAG00000021872	CADM1;RASGRP1
GO:0042267	natural killer cell mediated cytotoxicity	2	45	0.043134	0.3507	ENSBTAG00000000977;ENSBTAG00000021872	CADM1;RASGRP1
GO:0002228	natural killer cell mediated immunity	2	46	0.0448827	0.361352	ENSBTAG00000000977;ENSBTAG00000021872	CADM1;RASGRP1
GO:0001912	positive regulation of leukocyte mediated cytotoxicity	2	51	0.0540059	0.364984	ENSBTAG00000000977;ENSBTAG00000021872	CADM1;RASGRP1
GO:0031343	positive regulation of cell killing	2	57	0.0657289	0.374892	ENSBTAG00000000977;ENSBTAG00000021872	CADM1;RASGRP1
GO:0001910	regulation of leukocyte mediated cytotoxicity	2	63	0.0782101	0.388915	ENSBTAG00000000977;ENSBTAG00000021872	CADM1;RASGRP1
GO:0031341	regulation of cell killing	2	72	0.0981664	0.405515	ENSBTAG00000000977;ENSBTAG00000021872	CADM1;RASGRP1
GO:0001909	leukocyte mediated cytotoxicity	2	89	0.139068	0.454661	ENSBTAG00000000977;ENSBTAG00000021872	CADM1;RASGRP1
GO:0045089	positive regulation of innate immune response	2	91	0.144099	0.456453	ENSBTAG00000000977;ENSBTAG00000021872	CADM1;RASGRP1
GO:0002708	positive regulation of lymphocyte mediated immunity	2	99	0.164582	0.473923	ENSBTAG00000000977;ENSBTAG00000021872	CADM1;RASGRP1
GO:0002705	positive regulation of leukocyte mediated immunity	2	111	0.196158	0.498719	ENSBTAG00000000977;ENSBTAG00000021872	CADM1;RASGRP1
GO:0001906	cell killing	2	114	0.204172	0.506393	ENSBTAG00000000977;ENSBTAG00000021872	CADM1;RASGRP1
GO:0002833	positive regulation of response to biotic stimulus	2	121	0.223004	0.513438	ENSBTAG00000000977;ENSBTAG00000021872	CADM1;RASGRP1
GO:0002706	regulation of lymphocyte mediated immunity	2	141	0.277336	0.547958	ENSBTAG00000000977;ENSBTAG00000021872	CADM1;RASGRP1
GO:0045088	regulation of innate immune response	2	149	0.299077	0.560947	ENSBTAG00000000977;ENSBTAG00000021872	CADM1;RASGRP1
GO:0002703	regulation of leukocyte mediated immunity	2	176	0.371379	0.613128	ENSBTAG00000000977;ENSBTAG00000021872	CADM1;RASGRP1
GO:0031349	positive regulation of defense response	2	180	0.381868	0.618249	ENSBTAG00000000977;ENSBTAG00000021872	CADM1;RASGRP1
GO:0002699	positive regulation of immune effector process	2	187	0.400043	0.62917	ENSBTAG00000000977;ENSBTAG00000021872	CADM1;RASGRP1
GO:0002697	regulation of immune effector process	2	273	0.598434	0.735076	ENSBTAG00000000977;ENSBTAG00000021872	CADM1;RASGRP1
GO:0032103	positive regulation of response to external stimulus	2	295	0.640701	0.762846	ENSBTAG00000000977;ENSBTAG00000021872	CADM1;RASGRP1
GO:0019222	regulation of metabolic process	45	5344	0.154545	0.463933	ENSBTAG00000000977;ENSBTAG00000002348;ENSBTAG00000002606;ENSBTAG00000002728;ENSBTAG00000002835;ENSBTAG00000003359;ENSBTAG00000003399;ENSBTAG00000003505;ENSBTAG00000003581;ENSBTAG00000004257;ENSBTAG00000004647;ENSBTAG00000004982;ENSBTAG00000005215;ENSBTAG00000005627;ENSBTAG00000006468;ENSBTAG00000007047;ENSBTAG00000007159;ENSBTAG00000008148;ENSBTAG00000008733;ENSBTAG00000009023;ENSBTAG00000009070;…	CADM1;SLC4A4;LGR4;ARID1B;SMAD1;ELOVL5;SMARCA5;DCN;SETD7;TAF4B;UCP1;GPLD1;IL10RA;PAFAH1B2;PIWIL1;FZD10;ESR1;GCM1;MAGED1;TMTC3;NPFFR2;SPON1;ATP2B1;PKHD1;MAML3;SS18;ZNF827;RMND1;DDX39B;CALCOCO1;KITLG;IL15;MAP3K4;TFAP2B;PRR5L;RASGRP1;PRP4;PPP1R14C;SCAF8;TRIM26;TRIM44;SMAD2;LDLRAD3;ENSBTAG00000048304;KCTD1
GO:0048522	positive regulation of cellular process	40	4385	0.06928	0.376331	ENSBTAG00000000977;ENSBTAG00000002348;ENSBTAG00000002606;ENSBTAG00000002728;ENSBTAG00000002835;ENSBTAG00000003359;ENSBTAG00000003399;ENSBTAG00000003505;ENSBTAG00000004257;ENSBTAG00000004982;ENSBTAG00000005215;ENSBTAG00000005627;ENSBTAG00000006398;ENSBTAG00000007047;ENSBTAG00000007159;ENSBTAG00000007450;ENSBTAG00000008148;ENSBTAG00000009023;ENSBTAG00000009150;ENSBTAG00000011237;ENSBTAG00000011373;…	CADM1;SLC4A4;LGR4;ARID1B;SMAD1;ELOVL5;SMARCA5;DCN;TAF4B;GPLD1;IL10RA;PAFAH1B2;ENSBTAG00000006398;FZD10;ESR1;C2;GCM1;TMTC3;SPON1;PKHD1;MAML3;SS18;RASSF10;SLC1A2;RMND1;LMO3;EDNRA;DDX39B;AKAP12;CALCOCO1;CARMIL1;KITLG;IL15;MAP3K4;TFAP2B;PRR5L;RASGRP1;SCAF8;TRIM44;SMAD2
GO:0048518	positive regulation of biological process	44	4828	0.0566308	0.364984	ENSBTAG00000000977;ENSBTAG00000002348;ENSBTAG00000002606;ENSBTAG00000002728;ENSBTAG00000002835;ENSBTAG00000003359;ENSBTAG00000003399;ENSBTAG00000003505;ENSBTAG00000004257;ENSBTAG00000004647;ENSBTAG00000004982;ENSBTAG00000005215;ENSBTAG00000005627;ENSBTAG00000006398;ENSBTAG00000007047;ENSBTAG00000007159;ENSBTAG00000007450;ENSBTAG00000008148;ENSBTAG00000009023;ENSBTAG00000009150;ENSBTAG00000009552;…	CADM1;SLC4A4;LGR4;ARID1B;SMAD1;ELOVL5;SMARCA5;DCN;TAF4B;UCP1;GPLD1;IL10RA;PAFAH1B2;ENSBTAG00000006398;FZD10;ESR1;C2;GCM1;TMTC3;SPON1;ATP2B1;PKHD1;MAML3;SS18;RASSF10;SLC1A2;RMND1;LMO3;EDNRA;DDX39B;AKAP12;CALCOCO1;CARMIL1;KITLG;IL15;MAP3K4;TFAP2B;PRR5L;RASGRP1;PRP4;SCAF8;TRIM44;SMAD2;ENSBTAG00000048304
GO:0009893	positive regulation of metabolic process	32	2924	0.011035	0.320696	ENSBTAG00000000977;ENSBTAG00000002348;ENSBTAG00000002606;ENSBTAG00000002728;ENSBTAG00000002835;ENSBTAG00000003359;ENSBTAG00000003399;ENSBTAG00000003505;ENSBTAG00000004257;ENSBTAG00000004647;ENSBTAG00000004982;ENSBTAG00000005627;ENSBTAG00000007047;ENSBTAG00000007159;ENSBTAG00000008148;ENSBTAG00000009023;ENSBTAG00000009150;ENSBTAG00000011373;ENSBTAG00000011531;ENSBTAG00000013224;ENSBTAG00000014490;…	CADM1;SLC4A4;LGR4;ARID1B;SMAD1;ELOVL5;SMARCA5;DCN;TAF4B;UCP1;GPLD1;PAFAH1B2;FZD10;ESR1;GCM1;TMTC3;SPON1;MAML3;SS18;RMND1;DDX39B;CALCOCO1;KITLG;IL15;MAP3K4;TFAP2B;PRR5L;RASGRP1;PRP4;SCAF8;TRIM44;SMAD2
GO:0006952	defense response	9	1136	0.456785	0.655193	ENSBTAG00000000977;ENSBTAG00000002835;ENSBTAG00000007159;ENSBTAG00000007450;ENSBTAG00000013551;ENSBTAG00000018200;ENSBTAG00000021872;ENSBTAG00000035744;ENSBTAG00000037389	CADM1;SMAD1;ESR1;C2;NOX3;IL15;RASGRP1;TRIM26;TRIM44
GO:0010628	positive regulation of gene expression	9	834	0.159945	0.470564	ENSBTAG00000000977;ENSBTAG00000002835;ENSBTAG00000007159;ENSBTAG00000009150;ENSBTAG00000013224;ENSBTAG00000015016;ENSBTAG00000018200;ENSBTAG00000021872;ENSBTAG00000039916	CADM1;SMAD1;ESR1;SPON1;RMND1;CALCOCO1;IL15;RASGRP1;SMAD2
GO:0006950	response to stress	20	2718	0.533837	0.698503	ENSBTAG00000000977;ENSBTAG00000002835;ENSBTAG00000003399;ENSBTAG00000003581;ENSBTAG00000004098;ENSBTAG00000004647;ENSBTAG00000007159;ENSBTAG00000007450;ENSBTAG00000009023;ENSBTAG00000012628;ENSBTAG00000013551;ENSBTAG00000013674;ENSBTAG00000014490;ENSBTAG00000018200;ENSBTAG00000020079;ENSBTAG00000021029;ENSBTAG00000021872;ENSBTAG00000032148;ENSBTAG00000035744;ENSBTAG00000037389	CADM1;SMAD1;SMARCA5;SETD7;ARMT1;UCP1;ESR1;C2;TMTC3;SLC1A2;NOX3;EDNRA;DDX39B;IL15;MAP3K4;PRR5L;RASGRP1;TMEM117;TRIM26;TRIM44
GO:0043170	macromolecule metabolic process	57	8172	0.735394	0.815743	ENSBTAG00000000977;ENSBTAG00000001356;ENSBTAG00000002606;ENSBTAG00000002728;ENSBTAG00000002835;ENSBTAG00000003399;ENSBTAG00000003505;ENSBTAG00000003581;ENSBTAG00000004098;ENSBTAG00000004257;ENSBTAG00000004436;ENSBTAG00000004647;ENSBTAG00000004982;ENSBTAG00000006345;ENSBTAG00000006468;ENSBTAG00000006936;ENSBTAG00000006960;ENSBTAG00000007047;ENSBTAG00000007159;ENSBTAG00000007450;ENSBTAG00000008148;…	CADM1;USP38;LGR4;ARID1B;SMAD1;SMARCA5;DCN;SETD7;ARMT1;TAF4B;PPT2;UCP1;GPLD1;ART1;PIWIL1;MRPS18B;DHX16;FZD10;ESR1;C2;GCM1;MAGED1;TMTC3;NPFFR2;SPON1;ATP2B1;PKHD1;MAML3;SS18;ZNF827;RMND1;ANAPC10;EDNRA;LSM6;DDX39B;CALCOCO1;SIK3;PRPF40B;HS3ST2;KITLG;C5H12orf50;IL15;MAP3K4;TFAP2B;PRR5L;RASGRP1;ENSBTAG00000031913;SCAF8;SLC10A7;TRIM26;TRIM44;SMAD2;LDLRAD3;ENSBTAG00000048304;ENSBTAG00000048692;RNF150;KCTD1
GO:0008152	metabolic process	78	10030	0.242122	0.52892	ENSBTAG00000000977;ENSBTAG00000001356;ENSBTAG00000002348;ENSBTAG00000002606;ENSBTAG00000002728;ENSBTAG00000002835;ENSBTAG00000003359;ENSBTAG00000003399;ENSBTAG00000003505;ENSBTAG00000003581;ENSBTAG00000004098;ENSBTAG00000004257;ENSBTAG00000004288;ENSBTAG00000004436;ENSBTAG00000004647;ENSBTAG00000004982;ENSBTAG00000005215;ENSBTAG00000005479;ENSBTAG00000005627;ENSBTAG00000006345;ENSBTAG00000006468;…	CADM1;USP38;SLC4A4;LGR4;ARID1B;SMAD1;ELOVL5;SMARCA5;DCN;SETD7;ARMT1;TAF4B;GSTA4;PPT2;UCP1;GPLD1;IL10RA;LIPC;PAFAH1B2;ART1;PIWIL1;MRPS18B;DHX16;FZD10;ESR1;C2;GCM1;MAGED1;TMTC3;NPFFR2;TRAM2;SPON1;ATP2B1;MTHFD1L;PKHD1;MAML3;SS18;SLC1A2;ZNF827;MMAA;RMND1;ANAPC10;NOX3;EDNRA;GC;LSM6;INPP4B;MMUT;DDX39B;CALCOCO1;SIK3;IYD;CARMIL1;PRPF40B;HS3ST2;KITLG;C5H12orf50;IL15;MAP3K4;TFAP2B;PRR5L;RASGRP1;PRP4;ENSBTA…
GO:0071704	organic substance metabolic process	72	9546	0.401158	0.630505	ENSBTAG00000000977;ENSBTAG00000001356;ENSBTAG00000002348;ENSBTAG00000002606;ENSBTAG00000002728;ENSBTAG00000002835;ENSBTAG00000003359;ENSBTAG00000003399;ENSBTAG00000003505;ENSBTAG00000003581;ENSBTAG00000004098;ENSBTAG00000004257;ENSBTAG00000004288;ENSBTAG00000004436;ENSBTAG00000004647;ENSBTAG00000004982;ENSBTAG00000005479;ENSBTAG00000006345;ENSBTAG00000006468;ENSBTAG00000006936;ENSBTAG00000006960;…	CADM1;USP38;SLC4A4;LGR4;ARID1B;SMAD1;ELOVL5;SMARCA5;DCN;SETD7;ARMT1;TAF4B;GSTA4;PPT2;UCP1;GPLD1;LIPC;ART1;PIWIL1;MRPS18B;DHX16;FZD10;ESR1;C2;GCM1;MAGED1;TMTC3;NPFFR2;SPON1;ATP2B1;MTHFD1L;PKHD1;MAML3;SS18;SLC1A2;ZNF827;MMAA;RMND1;ANAPC10;EDNRA;GC;LSM6;INPP4B;MMUT;DDX39B;CALCOCO1;SIK3;IYD;CARMIL1;PRPF40B;HS3ST2;KITLG;C5H12orf50;IL15;MAP3K4;TFAP2B;PRR5L;RASGRP1;ENSBTAG00000025485;ENSBTAG00000031913;…
GO:0051638	barbed-end actin filament uncapping	1	1	0.00734301	0.320696	ENSBTAG00000016549	CARMIL1
GO:0051695	actin filament uncapping	1	2	0.0146325	0.320696	ENSBTAG00000016549	CARMIL1
GO:2000813	negative regulation of barbed-end actin filament capping	1	2	0.0146325	0.320696	ENSBTAG00000016549	CARMIL1
GO:2000812	regulation of barbed-end actin filament capping	1	4	0.0290526	0.334809	ENSBTAG00000016549	CARMIL1
GO:0051639	actin filament network formation	1	7	0.0502912	0.361821	ENSBTAG00000016549	CARMIL1
GO:0044351	macropinocytosis	1	8	0.0572677	0.364984	ENSBTAG00000016549	CARMIL1
GO:0030836	positive regulation of actin filament depolymerization	1	10	0.0710688	0.376331	ENSBTAG00000016549	CARMIL1
GO:1901881	positive regulation of protein depolymerization	1	14	0.0980723	0.405515	ENSBTAG00000016549	CARMIL1
GO:0006907	pinocytosis	1	18	0.124297	0.437164	ENSBTAG00000016549	CARMIL1
GO:0034315	regulation of Arp2/3 complex-mediated actin nucleation	1	20	0.137124	0.450796	ENSBTAG00000016549	CARMIL1
GO:0051016	barbed-end actin filament capping	1	20	0.137124	0.450796	ENSBTAG00000016549	CARMIL1
GO:1902745	positive regulation of lamellipodium organization	1	25	0.168383	0.474479	ENSBTAG00000016549	CARMIL1
GO:0043243	positive regulation of protein-containing complex disassembly	1	26	0.174498	0.4775	ENSBTAG00000016549	CARMIL1
GO:0051125	regulation of actin nucleation	1	29	0.192579	0.490671	ENSBTAG00000016549	CARMIL1
GO:1900026	positive regulation of substrate adhesion-dependent cell spreading	1	32	0.210266	0.509416	ENSBTAG00000016549	CARMIL1
GO:0051693	actin filament capping	1	33	0.216076	0.513438	ENSBTAG00000016549	CARMIL1
GO:2000249	regulation of actin cytoskeleton reorganization	1	34	0.221843	0.513438	ENSBTAG00000016549	CARMIL1
GO:0030835	negative regulation of actin filament depolymerization	1	37	0.238895	0.523577	ENSBTAG00000016549	CARMIL1
GO:1902743	regulation of lamellipodium organization	1	38	0.244496	0.52892	ENSBTAG00000016549	CARMIL1
GO:0034314	Arp2/3 complex-mediated actin nucleation	1	39	0.250056	0.532406	ENSBTAG00000016549	CARMIL1
GO:0051496	positive regulation of stress fiber assembly	1	41	0.261054	0.537786	ENSBTAG00000016549	CARMIL1
GO:0031529	ruffle organization	1	43	0.271893	0.544016	ENSBTAG00000016549	CARMIL1
GO:1900024	regulation of substrate adhesion-dependent cell spreading	1	43	0.271893	0.544016	ENSBTAG00000016549	CARMIL1
GO:0030834	regulation of actin filament depolymerization	1	45	0.282574	0.554083	ENSBTAG00000016549	CARMIL1
GO:0010770	positive regulation of cell morphogenesis involved in differentiation	1	47	0.293099	0.560393	ENSBTAG00000016549	CARMIL1
GO:0030042	actin filament depolymerization	1	49	0.303472	0.56605	ENSBTAG00000016549	CARMIL1
GO:0032233	positive regulation of actin filament bundle assembly	1	50	0.308601	0.568893	ENSBTAG00000016549	CARMIL1
GO:0030032	lamellipodium assembly	1	51	0.313693	0.572484	ENSBTAG00000016549	CARMIL1
GO:0030837	negative regulation of actin filament polymerization	1	53	0.323765	0.580131	ENSBTAG00000016549	CARMIL1
GO:0045010	actin nucleation	1	53	0.323765	0.580131	ENSBTAG00000016549	CARMIL1
GO:0010769	regulation of cell morphogenesis involved in differentiation	1	59	0.353111	0.601738	ENSBTAG00000016549	CARMIL1
GO:1901880	negative regulation of protein depolymerization	1	59	0.353111	0.601738	ENSBTAG00000016549	CARMIL1
GO:0032272	negative regulation of protein polymerization	1	63	0.37197	0.613128	ENSBTAG00000016549	CARMIL1
GO:0097581	lamellipodium organization	1	65	0.381193	0.618249	ENSBTAG00000016549	CARMIL1
GO:0051492	regulation of stress fiber assembly	1	68	0.394778	0.628325	ENSBTAG00000016549	CARMIL1
GO:1901879	regulation of protein depolymerization	1	71	0.408066	0.635455	ENSBTAG00000016549	CARMIL1
GO:0110020	regulation of actomyosin structure organization	1	75	0.425334	0.645307	ENSBTAG00000016549	CARMIL1
GO:0030038	contractile actin filament bundle assembly	1	80	0.446219	0.650369	ENSBTAG00000016549	CARMIL1
GO:0043149	stress fiber assembly	1	80	0.446219	0.650369	ENSBTAG00000016549	CARMIL1
GO:0032231	regulation of actin filament bundle assembly	1	81	0.450304	0.65289	ENSBTAG00000016549	CARMIL1
GO:0034446	substrate adhesion-dependent cell spreading	1	82	0.45436	0.653781	ENSBTAG00000016549	CARMIL1
GO:0030838	positive regulation of actin filament polymerization	1	86	0.470288	0.660244	ENSBTAG00000016549	CARMIL1
GO:0010811	positive regulation of cell-substrate adhesion	1	89	0.481931	0.665317	ENSBTAG00000016549	CARMIL1
GO:0031532	actin cytoskeleton reorganization	1	92	0.49332	0.674964	ENSBTAG00000016549	CARMIL1
GO:0051261	protein depolymerization	1	96	0.508119	0.682974	ENSBTAG00000016549	CARMIL1
GO:0043624	cellular protein complex disassembly	1	112	0.563149	0.715115	ENSBTAG00000016549	CARMIL1
GO:0032273	positive regulation of protein polymerization	1	113	0.566378	0.715378	ENSBTAG00000016549	CARMIL1
GO:0051017	actin filament bundle assembly	1	118	0.582172	0.725268	ENSBTAG00000016549	CARMIL1
GO:0061572	actin filament bundle organization	1	120	0.588328	0.728333	ENSBTAG00000016549	CARMIL1
GO:0051494	negative regulation of cytoskeleton organization	1	128	0.612067	0.745248	ENSBTAG00000016549	CARMIL1
GO:1902904	negative regulation of supramolecular fiber organization	1	130	0.617786	0.749129	ENSBTAG00000016549	CARMIL1
GO:0030833	regulation of actin filament polymerization	1	148	0.665637	0.775559	ENSBTAG00000016549	CARMIL1
GO:0031032	actomyosin structure organization	1	149	0.668114	0.776236	ENSBTAG00000016549	CARMIL1
GO:0010810	regulation of cell-substrate adhesion	1	150	0.670573	0.776919	ENSBTAG00000016549	CARMIL1
GO:0030041	actin filament polymerization	1	161	0.696453	0.791789	ENSBTAG00000016549	CARMIL1
GO:0008064	regulation of actin polymerization or depolymerization	1	162	0.698703	0.792824	ENSBTAG00000016549	CARMIL1
GO:0030832	regulation of actin filament length	1	163	0.700937	0.793574	ENSBTAG00000016549	CARMIL1
GO:1902905	positive regulation of supramolecular fiber organization	1	167	0.709708	0.799182	ENSBTAG00000016549	CARMIL1
GO:0008154	actin polymerization or depolymerization	1	185	0.746126	0.823348	ENSBTAG00000016549	CARMIL1
GO:0051495	positive regulation of cytoskeleton organization	1	187	0.749882	0.826336	ENSBTAG00000016549	CARMIL1
GO:0032271	regulation of protein polymerization	1	192	0.759031	0.833508	ENSBTAG00000016549	CARMIL1
GO:0031346	positive regulation of cell projection organization	1	201	0.774671	0.84422	ENSBTAG00000016549	CARMIL1
GO:0022604	regulation of cell morphogenesis	1	203	0.778007	0.845909	ENSBTAG00000016549	CARMIL1
GO:0110053	regulation of actin filament organization	1	230	0.818531	0.872338	ENSBTAG00000016549	CARMIL1
GO:0051258	protein polymerization	1	244	0.83656	0.885176	ENSBTAG00000016549	CARMIL1
GO:0031589	cell-substrate adhesion	1	262	0.857153	0.899326	ENSBTAG00000016549	CARMIL1
GO:0032535	regulation of cellular component size	1	297	0.890107	0.922453	ENSBTAG00000016549	CARMIL1
GO:1902903	regulation of supramolecular fiber organization	1	310	0.900321	0.928566	ENSBTAG00000016549	CARMIL1
GO:0007015	actin filament organization	1	364	0.933586	0.949226	ENSBTAG00000016549	CARMIL1
GO:0120035	regulation of plasma membrane bounded cell projection organization	1	401	0.949754	0.960671	ENSBTAG00000016549	CARMIL1
GO:0031344	regulation of cell projection organization	1	408	0.95234	0.962095	ENSBTAG00000016549	CARMIL1
GO:0045785	positive regulation of cell adhesion	4	326	0.218264	0.513438	ENSBTAG00000016549;ENSBTAG00000017549;ENSBTAG00000018200;ENSBTAG00000021872	CARMIL1;KITLG;IL15;RASGRP1
GO:0030155	regulation of cell adhesion	4	550	0.578079	0.723592	ENSBTAG00000016549;ENSBTAG00000017549;ENSBTAG00000018200;ENSBTAG00000021872	CARMIL1;KITLG;IL15;RASGRP1
GO:0043242	negative regulation of protein-containing complex disassembly	2	68	0.0891279	0.400616	ENSBTAG00000016549;ENSBTAG00000031917	CARMIL1;SCAF8
GO:0043244	regulation of protein-containing complex disassembly	2	102	0.172392	0.4775	ENSBTAG00000016549;ENSBTAG00000031917	CARMIL1;SCAF8
GO:0032984	protein-containing complex disassembly	2	190	0.407757	0.635455	ENSBTAG00000016549;ENSBTAG00000031917	CARMIL1;SCAF8
GO:0022411	cellular component disassembly	2	334	0.706985	0.797878	ENSBTAG00000016549;ENSBTAG00000031917	CARMIL1;SCAF8
GO:0046415	urate metabolic process	2	12	0.00336441	0.320696	ENSBTAG00000016549;ENSBTAG00000037917	CARMIL1;SLC17A1
GO:1902412	regulation of mitotic cytokinesis	1	5	0.036184	0.348894	ENSBTAG00000006060	DCDC1
GO:0000281	mitotic cytokinesis	1	54	0.328747	0.582093	ENSBTAG00000006060	DCDC1
GO:0061640	cytoskeleton-dependent cytokinesis	1	67	0.390283	0.627155	ENSBTAG00000006060	DCDC1
GO:0032465	regulation of cytokinesis	1	72	0.412431	0.638472	ENSBTAG00000006060	DCDC1
GO:0000910	cytokinesis	1	124	0.600372	0.735242	ENSBTAG00000006060	DCDC1
GO:0051302	regulation of cell division	1	130	0.617786	0.749129	ENSBTAG00000006060	DCDC1
GO:0019800	peptide cross-linking via chondroitin 4-sulfate glycosaminoglycan	1	5	0.036184	0.348894	ENSBTAG00000003505	DCN
GO:0051901	positive regulation of mitochondrial depolarization	1	6	0.0432634	0.3507	ENSBTAG00000003505	DCN
GO:1904181	positive regulation of membrane depolarization	1	6	0.0432634	0.3507	ENSBTAG00000003505	DCN
GO:1900747	negative regulation of vascular endothelial growth factor signaling pathway	1	10	0.0710688	0.376331	ENSBTAG00000003505	DCN
GO:1902548	negative regulation of cellular response to vascular endothelial growth factor stimulus	1	12	0.0846693	0.400616	ENSBTAG00000003505	DCN
GO:0051900	regulation of mitochondrial depolarization	1	14	0.0980723	0.405515	ENSBTAG00000003505	DCN
GO:0051882	mitochondrial depolarization	1	15	0.104701	0.413044	ENSBTAG00000003505	DCN
GO:0090141	positive regulation of mitochondrial fission	1	18	0.124297	0.437164	ENSBTAG00000003505	DCN
GO:1900746	regulation of vascular endothelial growth factor signaling pathway	1	20	0.137124	0.450796	ENSBTAG00000003505	DCN
GO:1902547	regulation of cellular response to vascular endothelial growth factor stimulus	1	22	0.149765	0.457321	ENSBTAG00000003505	DCN
GO:0030204	chondroitin sulfate metabolic process	1	23	0.156016	0.463933	ENSBTAG00000003505	DCN
GO:0090140	regulation of mitochondrial fission	1	25	0.168383	0.474479	ENSBTAG00000003505	DCN
GO:0018149	peptide cross-linking	1	26	0.174498	0.4775	ENSBTAG00000003505	DCN
GO:0050654	chondroitin sulfate proteoglycan metabolic process	1	28	0.186596	0.488576	ENSBTAG00000003505	DCN
GO:0003254	regulation of membrane depolarization	1	30	0.198518	0.500402	ENSBTAG00000003505	DCN
GO:0000266	mitochondrial fission	1	33	0.216076	0.513438	ENSBTAG00000003505	DCN
GO:0038084	vascular endothelial growth factor signaling pathway	1	34	0.221843	0.513438	ENSBTAG00000003505	DCN
GO:0010596	negative regulation of endothelial cell migration	1	43	0.271893	0.544016	ENSBTAG00000003505	DCN
GO:0035924	cellular response to vascular endothelial growth factor stimulus	1	50	0.308601	0.568893	ENSBTAG00000003505	DCN
GO:0051881	regulation of mitochondrial membrane potential	1	51	0.313693	0.572484	ENSBTAG00000003505	DCN
GO:0051899	membrane depolarization	1	51	0.313693	0.572484	ENSBTAG00000003505	DCN
GO:0010633	negative regulation of epithelial cell migration	1	53	0.323765	0.580131	ENSBTAG00000003505	DCN
GO:0010822	positive regulation of mitochondrion organization	1	54	0.328747	0.582093	ENSBTAG00000003505	DCN
GO:0016525	negative regulation of angiogenesis	1	75	0.425334	0.645307	ENSBTAG00000003505	DCN
GO:2000181	negative regulation of blood vessel morphogenesis	1	75	0.425334	0.645307	ENSBTAG00000003505	DCN
GO:1901343	negative regulation of vasculature development	1	76	0.429573	0.647513	ENSBTAG00000003505	DCN
GO:0090288	negative regulation of cellular response to growth factor stimulus	1	79	0.442103	0.650369	ENSBTAG00000003505	DCN
GO:0030336	negative regulation of cell migration	1	200	0.772984	0.843293	ENSBTAG00000003505	DCN
GO:0051271	negative regulation of cellular component movement	1	210	0.789303	0.854157	ENSBTAG00000003505	DCN
GO:2000146	negative regulation of cell motility	1	210	0.789303	0.854157	ENSBTAG00000003505	DCN
GO:0040013	negative regulation of locomotion	1	231	0.819882	0.872992	ENSBTAG00000003505	DCN
GO:0018209	peptidyl-serine modification	1	265	0.860325	0.901456	ENSBTAG00000003505	DCN
GO:0010638	positive regulation of organelle organization	3	438	0.627685	0.756097	ENSBTAG00000003505;ENSBTAG00000016549;ENSBTAG00000020079	DCN;CARMIL1;MAP3K4
GO:0030203	glycosaminoglycan metabolic process	4	85	0.00354756	0.320696	ENSBTAG00000003505;ENSBTAG00000013674;ENSBTAG00000017391;ENSBTAG00000034522	DCN;EDNRA;HS3ST2;SLC10A7
GO:0006022	aminoglycan metabolic process	4	96	0.00547238	0.320696	ENSBTAG00000003505;ENSBTAG00000013674;ENSBTAG00000017391;ENSBTAG00000034522	DCN;EDNRA;HS3ST2;SLC10A7
GO:1903510	mucopolysaccharide metabolic process	3	69	0.0142432	0.320696	ENSBTAG00000003505;ENSBTAG00000013674;ENSBTAG00000034522	DCN;EDNRA;SLC10A7
GO:0051130	positive regulation of cellular component organization	5	787	0.691256	0.790055	ENSBTAG00000003505;ENSBTAG00000007159;ENSBTAG00000008148;ENSBTAG00000016549;ENSBTAG00000020079	DCN;ESR1;GCM1;CARMIL1;MAP3K4
GO:1902533	positive regulation of intracellular signal transduction	8	692	0.136899	0.450796	ENSBTAG00000003505;ENSBTAG00000007047;ENSBTAG00000014788;ENSBTAG00000017549;ENSBTAG00000020079;ENSBTAG00000021029;ENSBTAG00000021872;ENSBTAG00000037389	DCN;FZD10;AKAP12;KITLG;MAP3K4;PRR5L;RASGRP1;TRIM44
GO:1902531	regulation of intracellular signal transduction	13	1207	0.105636	0.414662	ENSBTAG00000003505;ENSBTAG00000007047;ENSBTAG00000007159;ENSBTAG00000009070;ENSBTAG00000011237;ENSBTAG00000013541;ENSBTAG00000014490;ENSBTAG00000014788;ENSBTAG00000017549;ENSBTAG00000020079;ENSBTAG00000021029;ENSBTAG00000021872;ENSBTAG00000037389	DCN;FZD10;ESR1;NPFFR2;PKHD1;LMO3;DDX39B;AKAP12;KITLG;MAP3K4;PRR5L;RASGRP1;TRIM44
GO:0010594	regulation of endothelial cell migration	2	129	0.244684	0.52892	ENSBTAG00000003505;ENSBTAG00000004982	DCN;GPLD1
GO:0010632	regulation of epithelial cell migration	2	172	0.360822	0.606342	ENSBTAG00000003505;ENSBTAG00000004982	DCN;GPLD1
GO:0043542	endothelial cell migration	2	173	0.363468	0.607148	ENSBTAG00000003505;ENSBTAG00000004982	DCN;GPLD1
GO:0030334	regulation of cell migration	5	684	0.567782	0.716768	ENSBTAG00000003505;ENSBTAG00000004982;ENSBTAG00000016549;ENSBTAG00000017549;ENSBTAG00000021029	DCN;GPLD1;CARMIL1;KITLG;PRR5L
GO:2000145	regulation of cell motility	5	725	0.619853	0.75102	ENSBTAG00000003505;ENSBTAG00000004982;ENSBTAG00000016549;ENSBTAG00000017549;ENSBTAG00000021029	DCN;GPLD1;CARMIL1;KITLG;PRR5L
GO:0040012	regulation of locomotion	5	756	0.656714	0.771146	ENSBTAG00000003505;ENSBTAG00000004982;ENSBTAG00000016549;ENSBTAG00000017549;ENSBTAG00000021029	DCN;GPLD1;CARMIL1;KITLG;PRR5L
GO:0051270	regulation of cellular component movement	5	764	0.665855	0.775559	ENSBTAG00000003505;ENSBTAG00000004982;ENSBTAG00000016549;ENSBTAG00000017549;ENSBTAG00000021029	DCN;GPLD1;CARMIL1;KITLG;PRR5L
GO:0016477	cell migration	6	1140	0.850567	0.895619	ENSBTAG00000003505;ENSBTAG00000004982;ENSBTAG00000013674;ENSBTAG00000016549;ENSBTAG00000017549;ENSBTAG00000021029	DCN;GPLD1;EDNRA;CARMIL1;KITLG;PRR5L
GO:0048870	cell motility	6	1280	0.915746	0.938342	ENSBTAG00000003505;ENSBTAG00000004982;ENSBTAG00000013674;ENSBTAG00000016549;ENSBTAG00000017549;ENSBTAG00000021029	DCN;GPLD1;EDNRA;CARMIL1;KITLG;PRR5L
GO:0051674	localization of cell	6	1280	0.915746	0.938342	ENSBTAG00000003505;ENSBTAG00000004982;ENSBTAG00000013674;ENSBTAG00000016549;ENSBTAG00000017549;ENSBTAG00000021029	DCN;GPLD1;EDNRA;CARMIL1;KITLG;PRR5L
GO:0040011	locomotion	6	1414	0.953606	0.962706	ENSBTAG00000003505;ENSBTAG00000004982;ENSBTAG00000013674;ENSBTAG00000016549;ENSBTAG00000017549;ENSBTAG00000021029	DCN;GPLD1;EDNRA;CARMIL1;KITLG;PRR5L
GO:0001667	ameboidal-type cell migration	5	340	0.105593	0.414662	ENSBTAG00000003505;ENSBTAG00000004982;ENSBTAG00000013674;ENSBTAG00000017549;ENSBTAG00000021029	DCN;GPLD1;EDNRA;KITLG;PRR5L
GO:0010631	epithelial cell migration	3	239	0.25663	0.537786	ENSBTAG00000003505;ENSBTAG00000004982;ENSBTAG00000017549	DCN;GPLD1;KITLG
GO:0090132	epithelium migration	3	241	0.260582	0.537786	ENSBTAG00000003505;ENSBTAG00000004982;ENSBTAG00000017549	DCN;GPLD1;KITLG
GO:0090130	tissue migration	3	243	0.264541	0.538677	ENSBTAG00000003505;ENSBTAG00000004982;ENSBTAG00000017549	DCN;GPLD1;KITLG
GO:0007169	transmembrane receptor protein tyrosine kinase signaling pathway	4	471	0.456141	0.654751	ENSBTAG00000003505;ENSBTAG00000004982;ENSBTAG00000011531;ENSBTAG00000016071	DCN;GPLD1;SS18;HHIP
GO:0032879	regulation of localization	14	1973	0.596202	0.733859	ENSBTAG00000003505;ENSBTAG00000004982;ENSBTAG00000005206;ENSBTAG00000006398;ENSBTAG00000007450;ENSBTAG00000009552;ENSBTAG00000012628;ENSBTAG00000013674;ENSBTAG00000015119;ENSBTAG00000016549;ENSBTAG00000017549;ENSBTAG00000018200;ENSBTAG00000020426;ENSBTAG00000021029	DCN;GPLD1;TMEM14A;ENSBTAG00000006398;C2;ATP2B1;SLC1A2;EDNRA;SIK3;CARMIL1;KITLG;IL15;TFAP2B;PRR5L
GO:0006790	sulfur compound metabolic process	8	239	0.000385325	0.228016	ENSBTAG00000003505;ENSBTAG00000004288;ENSBTAG00000012628;ENSBTAG00000013674;ENSBTAG00000014272;ENSBTAG00000025485;ENSBTAG00000034522;ENSBTAG00000037949	DCN;GSTA4;SLC1A2;EDNRA;MMUT;ENSBTAG00000025485;SLC10A7;GSTA5
GO:0090287	regulation of cellular response to growth factor stimulus	4	229	0.0884062	0.400616	ENSBTAG00000003505;ENSBTAG00000016071;ENSBTAG00000020426;ENSBTAG00000039916	DCN;HHIP;TFAP2B;SMAD2
GO:0006029	proteoglycan metabolic process	2	73	0.100465	0.410002	ENSBTAG00000003505;ENSBTAG00000017391	DCN;HS3ST2
GO:0010506	regulation of autophagy	3	222	0.223451	0.513438	ENSBTAG00000003505;ENSBTAG00000005215;ENSBTAG00000005627	DCN;IL10RA;PAFAH1B2
GO:0006914	autophagy	3	366	0.505765	0.682135	ENSBTAG00000003505;ENSBTAG00000005215;ENSBTAG00000005627	DCN;IL10RA;PAFAH1B2
GO:0061919	process utilizing autophagic mechanism	3	366	0.505765	0.682135	ENSBTAG00000003505;ENSBTAG00000005215;ENSBTAG00000005627	DCN;IL10RA;PAFAH1B2
GO:0016239	positive regulation of macroautophagy	2	57	0.0657289	0.374892	ENSBTAG00000003505;ENSBTAG00000005627	DCN;PAFAH1B2
GO:0016241	regulation of macroautophagy	2	98	0.161993	0.470564	ENSBTAG00000003505;ENSBTAG00000005627	DCN;PAFAH1B2
GO:0010508	positive regulation of autophagy	2	113	0.201497	0.504168	ENSBTAG00000003505;ENSBTAG00000005627	DCN;PAFAH1B2
GO:0016236	macroautophagy	2	211	0.460345	0.655758	ENSBTAG00000003505;ENSBTAG00000005627	DCN;PAFAH1B2
GO:0014068	positive regulation of phosphatidylinositol 3-kinase signaling	2	55	0.0617325	0.369698	ENSBTAG00000003505;ENSBTAG00000021029	DCN;PRR5L
GO:0014066	regulation of phosphatidylinositol 3-kinase signaling	3	70	0.0148027	0.32145	ENSBTAG00000003505;ENSBTAG00000021029;ENSBTAG00000021872	DCN;PRR5L;RASGRP1
GO:0014065	phosphatidylinositol 3-kinase signaling	3	98	0.0355118	0.348894	ENSBTAG00000003505;ENSBTAG00000021029;ENSBTAG00000021872	DCN;PRR5L;RASGRP1
GO:0048015	phosphatidylinositol-mediated signaling	3	124	0.0632645	0.369698	ENSBTAG00000003505;ENSBTAG00000021029;ENSBTAG00000021872	DCN;PRR5L;RASGRP1
GO:0048017	inositol lipid-mediated signaling	3	127	0.0669624	0.376331	ENSBTAG00000003505;ENSBTAG00000021029;ENSBTAG00000021872	DCN;PRR5L;RASGRP1
GO:0018193	peptidyl-amino acid modification	6	1018	0.765235	0.837407	ENSBTAG00000003505;ENSBTAG00000003581;ENSBTAG00000006345;ENSBTAG00000017549;ENSBTAG00000018200;ENSBTAG00000048692	DCN;SETD7;ART1;KITLG;IL15;ENSBTAG00000048692
GO:0010821	regulation of mitochondrion organization	2	101	0.169781	0.477284	ENSBTAG00000003505;ENSBTAG00000005206	DCN;TMEM14A
GO:0007005	mitochondrion organization	5	411	0.185086	0.488576	ENSBTAG00000003505;ENSBTAG00000005206;ENSBTAG00000006398;ENSBTAG00000013674;ENSBTAG00000047358	DCN;TMEM14A;ENSBTAG00000006398;EDNRA;HIGD1C
GO:0009100	glycoprotein metabolic process	4	309	0.192457	0.490671	ENSBTAG00000003505;ENSBTAG00000009023;ENSBTAG00000017391;ENSBTAG00000018200	DCN;TMTC3;HS3ST2;IL15
GO:0006928	movement of cell or subcellular component	8	1624	0.918713	0.940237	ENSBTAG00000003505;ENSBTAG00000004167;ENSBTAG00000004982;ENSBTAG00000013674;ENSBTAG00000016549;ENSBTAG00000017549;ENSBTAG00000021029;ENSBTAG00000021872	DCN;TTC29;GPLD1;EDNRA;CARMIL1;KITLG;PRR5L;RASGRP1
GO:2000002	negative regulation of DNA damage checkpoint	1	4	0.0290526	0.334809	ENSBTAG00000014490	DDX39B
GO:0044417	translocation of molecules into host	1	6	0.0432634	0.3507	ENSBTAG00000014490	DDX39B
GO:0046784	viral mRNA export from host cell nucleus	1	6	0.0432634	0.3507	ENSBTAG00000014490	DDX39B
GO:1901977	negative regulation of cell cycle checkpoint	1	6	0.0432634	0.3507	ENSBTAG00000014490	DDX39B
GO:0010501	RNA secondary structure unwinding	1	9	0.0641935	0.369698	ENSBTAG00000014490	DDX39B
GO:2000001	regulation of DNA damage checkpoint	1	13	0.0913953	0.400616	ENSBTAG00000014490	DDX39B
GO:1901976	regulation of cell cycle checkpoint	1	24	0.162222	0.470564	ENSBTAG00000014490	DDX39B
GO:0000245	spliceosomal complex assembly	1	34	0.221843	0.513438	ENSBTAG00000014490	DDX39B
GO:2001021	negative regulation of response to DNA damage stimulus	1	64	0.376599	0.61482	ENSBTAG00000014490	DDX39B
GO:1901989	positive regulation of cell cycle phase transition	1	84	0.462383	0.655758	ENSBTAG00000014490	DDX39B
GO:0000077	DNA damage checkpoint signaling	1	92	0.49332	0.674964	ENSBTAG00000014490	DDX39B
GO:0031570	DNA integrity checkpoint signaling	1	97	0.511751	0.684442	ENSBTAG00000014490	DDX39B
GO:0000075	cell cycle checkpoint signaling	1	138	0.639839	0.762204	ENSBTAG00000014490	DDX39B
GO:0042770	signal transduction in response to DNA damage	1	144	0.655546	0.770828	ENSBTAG00000014490	DDX39B
GO:0022618	ribonucleoprotein complex assembly	1	166	0.70754	0.797878	ENSBTAG00000014490	DDX39B
GO:0071826	ribonucleoprotein complex subunit organization	1	172	0.720315	0.805759	ENSBTAG00000014490	DDX39B
GO:0090068	positive regulation of cell cycle process	1	184	0.744228	0.822019	ENSBTAG00000014490	DDX39B
GO:1901988	negative regulation of cell cycle phase transition	1	184	0.744228	0.822019	ENSBTAG00000014490	DDX39B
GO:0045787	positive regulation of cell cycle	1	242	0.834098	0.884151	ENSBTAG00000014490	DDX39B
GO:1901987	regulation of cell cycle phase transition	1	299	0.891743	0.922937	ENSBTAG00000014490	DDX39B
GO:0022613	ribonucleoprotein complex biogenesis	1	369	0.93604	0.950497	ENSBTAG00000014490	DDX39B
GO:0044770	cell cycle phase transition	1	382	0.94201	0.955329	ENSBTAG00000014490	DDX39B
GO:0006406	mRNA export from nucleus	2	52	0.0559033	0.364984	ENSBTAG00000014490;ENSBTAG00000018180	DDX39B;C5H12orf50
GO:0071427	mRNA-containing ribonucleoprotein complex export from nucleus	2	52	0.0559033	0.364984	ENSBTAG00000014490;ENSBTAG00000018180	DDX39B;C5H12orf50
GO:0051028	mRNA transport	2	67	0.0869093	0.400616	ENSBTAG00000014490;ENSBTAG00000018180	DDX39B;C5H12orf50
GO:0006405	RNA export from nucleus	2	69	0.0913632	0.400616	ENSBTAG00000014490;ENSBTAG00000018180	DDX39B;C5H12orf50
GO:0071426	ribonucleoprotein complex export from nucleus	2	71	0.0958829	0.405515	ENSBTAG00000014490;ENSBTAG00000018180	DDX39B;C5H12orf50
GO:0071166	ribonucleoprotein complex localization	2	72	0.0981664	0.405515	ENSBTAG00000014490;ENSBTAG00000018180	DDX39B;C5H12orf50
GO:0050657	nucleic acid transport	2	99	0.164582	0.473923	ENSBTAG00000014490;ENSBTAG00000018180	DDX39B;C5H12orf50
GO:0050658	RNA transport	2	99	0.164582	0.473923	ENSBTAG00000014490;ENSBTAG00000018180	DDX39B;C5H12orf50
GO:0051236	establishment of RNA localization	2	102	0.172392	0.4775	ENSBTAG00000014490;ENSBTAG00000018180	DDX39B;C5H12orf50
GO:0006403	RNA localization	2	121	0.223004	0.513438	ENSBTAG00000014490;ENSBTAG00000018180	DDX39B;C5H12orf50
GO:0051168	nuclear export	2	131	0.250121	0.532406	ENSBTAG00000014490;ENSBTAG00000018180	DDX39B;C5H12orf50
GO:0015931	nucleobase-containing compound transport	2	148	0.296363	0.560947	ENSBTAG00000014490;ENSBTAG00000018180	DDX39B;C5H12orf50
GO:0031503	protein-containing complex localization	2	193	0.415424	0.640987	ENSBTAG00000014490;ENSBTAG00000018180	DDX39B;C5H12orf50
GO:0006913	nucleocytoplasmic transport	2	254	0.559049	0.712897	ENSBTAG00000014490;ENSBTAG00000018180	DDX39B;C5H12orf50
GO:0051169	nuclear transport	2	254	0.559049	0.712897	ENSBTAG00000014490;ENSBTAG00000018180	DDX39B;C5H12orf50
GO:0006354	DNA-templated transcription, elongation	3	139	0.0827052	0.400616	ENSBTAG00000014490;ENSBTAG00000015016;ENSBTAG00000031917	DDX39B;CALCOCO1;SCAF8
GO:0032786	positive regulation of DNA-templated transcription, elongation	2	26	0.0154939	0.333401	ENSBTAG00000014490;ENSBTAG00000031917	DDX39B;SCAF8
GO:0032784	regulation of DNA-templated transcription, elongation	2	50	0.0521323	0.364984	ENSBTAG00000014490;ENSBTAG00000031917	DDX39B;SCAF8
GO:0051701	biological process involved in interaction with host	2	127	0.239253	0.523878	ENSBTAG00000014490;ENSBTAG00000035744	DDX39B;TRIM26
GO:0044403	biological process involved in symbiotic interaction	2	204	0.443105	0.650369	ENSBTAG00000014490;ENSBTAG00000035744	DDX39B;TRIM26
GO:0006396	RNA processing	6	755	0.481026	0.665317	ENSBTAG00000006960;ENSBTAG00000007159;ENSBTAG00000014060;ENSBTAG00000014490;ENSBTAG00000016589;ENSBTAG00000031917	DHX16;ESR1;LSM6;DDX39B;PRPF40B;SCAF8
GO:0000375	RNA splicing, via transesterification reactions	4	261	0.125984	0.441129	ENSBTAG00000006960;ENSBTAG00000014060;ENSBTAG00000014490;ENSBTAG00000016589	DHX16;LSM6;DDX39B;PRPF40B
GO:0000377	RNA splicing, via transesterification reactions with bulged adenosine as nucleophile	4	261	0.125984	0.441129	ENSBTAG00000006960;ENSBTAG00000014060;ENSBTAG00000014490;ENSBTAG00000016589	DHX16;LSM6;DDX39B;PRPF40B
GO:0000398	mRNA splicing, via spliceosome	4	261	0.125984	0.441129	ENSBTAG00000006960;ENSBTAG00000014060;ENSBTAG00000014490;ENSBTAG00000016589	DHX16;LSM6;DDX39B;PRPF40B
GO:0008380	RNA splicing	4	329	0.222915	0.513438	ENSBTAG00000006960;ENSBTAG00000014060;ENSBTAG00000014490;ENSBTAG00000016589	DHX16;LSM6;DDX39B;PRPF40B
GO:0006397	mRNA processing	5	355	0.1207	0.437164	ENSBTAG00000006960;ENSBTAG00000014060;ENSBTAG00000014490;ENSBTAG00000016589;ENSBTAG00000031917	DHX16;LSM6;DDX39B;PRPF40B;SCAF8
GO:0007382	specification of segmental identity, maxillary segment	1	2	0.0146325	0.320696	ENSBTAG00000013674	EDNRA
GO:0044751	cellular response to human chorionic gonadotropin stimulus	1	2	0.0146325	0.320696	ENSBTAG00000013674	EDNRA
GO:0044752	response to human chorionic gonadotropin	1	2	0.0146325	0.320696	ENSBTAG00000013674	EDNRA
GO:1905871	regulation of protein localization to cell leading edge	1	2	0.0146325	0.320696	ENSBTAG00000013674	EDNRA
GO:0003220	left ventricular cardiac muscle tissue morphogenesis	1	3	0.0218689	0.334809	ENSBTAG00000013674	EDNRA
GO:0042305	specification of segmental identity, mandibular segment	1	3	0.0218689	0.334809	ENSBTAG00000013674	EDNRA
GO:0071373	cellular response to luteinizing hormone stimulus	1	3	0.0218689	0.334809	ENSBTAG00000013674	EDNRA
GO:0072011	glomerular endothelium development	1	3	0.0218689	0.334809	ENSBTAG00000013674	EDNRA
GO:0086101	endothelin receptor signaling pathway involved in heart process	1	3	0.0218689	0.334809	ENSBTAG00000013674	EDNRA
GO:0097492	sympathetic neuron axon guidance	1	3	0.0218689	0.334809	ENSBTAG00000013674	EDNRA
GO:1903210	glomerular visceral epithelial cell apoptotic process	1	3	0.0218689	0.334809	ENSBTAG00000013674	EDNRA
GO:0007380	specification of segmental identity, head	1	4	0.0290526	0.334809	ENSBTAG00000013674	EDNRA
GO:0014034	neural crest cell fate commitment	1	4	0.0290526	0.334809	ENSBTAG00000013674	EDNRA
GO:0034699	response to luteinizing hormone	1	4	0.0290526	0.334809	ENSBTAG00000013674	EDNRA
GO:0035287	head segmentation	1	4	0.0290526	0.334809	ENSBTAG00000013674	EDNRA
GO:0035289	posterior head segmentation	1	4	0.0290526	0.334809	ENSBTAG00000013674	EDNRA
GO:0097018	renal albumin absorption	1	4	0.0290526	0.334809	ENSBTAG00000013674	EDNRA
GO:1902463	protein localization to cell leading edge	1	4	0.0290526	0.334809	ENSBTAG00000013674	EDNRA
GO:0060385	axonogenesis involved in innervation	1	5	0.036184	0.348894	ENSBTAG00000013674	EDNRA
GO:0071372	cellular response to follicle-stimulating hormone stimulus	1	5	0.036184	0.348894	ENSBTAG00000013674	EDNRA
GO:0032354	response to follicle-stimulating hormone	1	6	0.0432634	0.3507	ENSBTAG00000013674	EDNRA
GO:0097017	renal protein absorption	1	6	0.0432634	0.3507	ENSBTAG00000013674	EDNRA
GO:1903537	meiotic cell cycle process involved in oocyte maturation	1	6	0.0432634	0.3507	ENSBTAG00000013674	EDNRA
GO:0003357	noradrenergic neuron differentiation	1	7	0.0502912	0.361821	ENSBTAG00000013674	EDNRA
GO:0014824	artery smooth muscle contraction	1	7	0.0502912	0.361821	ENSBTAG00000013674	EDNRA
GO:0003228	atrial cardiac muscle tissue development	1	8	0.0572677	0.364984	ENSBTAG00000013674	EDNRA
GO:0003253	cardiac neural crest cell migration involved in outflow tract morphogenesis	1	8	0.0572677	0.364984	ENSBTAG00000013674	EDNRA
GO:0048865	stem cell fate commitment	1	8	0.0572677	0.364984	ENSBTAG00000013674	EDNRA
GO:0061626	pharyngeal arch artery morphogenesis	1	8	0.0572677	0.364984	ENSBTAG00000013674	EDNRA
GO:0014820	tonic smooth muscle contraction	1	9	0.0641935	0.369698	ENSBTAG00000013674	EDNRA
GO:0016322	neuron remodeling	1	9	0.0641935	0.369698	ENSBTAG00000013674	EDNRA
GO:0070294	renal sodium ion absorption	1	9	0.0641935	0.369698	ENSBTAG00000013674	EDNRA
GO:0086103	G protein-coupled receptor signaling pathway involved in heart process	1	9	0.0641935	0.369698	ENSBTAG00000013674	EDNRA
GO:0097084	vascular associated smooth muscle cell development	1	9	0.0641935	0.369698	ENSBTAG00000013674	EDNRA
GO:0003207	cardiac chamber formation	1	10	0.0710688	0.376331	ENSBTAG00000013674	EDNRA
GO:0061309	cardiac neural crest cell development involved in outflow tract morphogenesis	1	10	0.0710688	0.376331	ENSBTAG00000013674	EDNRA
GO:0071371	cellular response to gonadotropin stimulus	1	10	0.0710688	0.376331	ENSBTAG00000013674	EDNRA
GO:0086100	endothelin receptor signaling pathway	1	10	0.0710688	0.376331	ENSBTAG00000013674	EDNRA
GO:0014029	neural crest formation	1	11	0.0778939	0.388915	ENSBTAG00000013674	EDNRA
GO:0034698	response to gonadotropin	1	11	0.0778939	0.388915	ENSBTAG00000013674	EDNRA
GO:0042415	norepinephrine metabolic process	1	11	0.0778939	0.388915	ENSBTAG00000013674	EDNRA
GO:0097152	mesenchymal cell apoptotic process	1	11	0.0778939	0.388915	ENSBTAG00000013674	EDNRA
GO:0003096	renal sodium ion transport	1	12	0.0846693	0.400616	ENSBTAG00000013674	EDNRA
GO:0048484	enteric nervous system development	1	12	0.0846693	0.400616	ENSBTAG00000013674	EDNRA
GO:1902287	semaphorin-plexin signaling pathway involved in axon guidance	1	12	0.0846693	0.400616	ENSBTAG00000013674	EDNRA
GO:0001975	response to amphetamine	1	13	0.0913953	0.400616	ENSBTAG00000013674	EDNRA
GO:0014075	response to amine	1	13	0.0913953	0.400616	ENSBTAG00000013674	EDNRA
GO:0061307	cardiac neural crest cell differentiation involved in heart development	1	13	0.0913953	0.400616	ENSBTAG00000013674	EDNRA
GO:0061308	cardiac neural crest cell development involved in heart development	1	13	0.0913953	0.400616	ENSBTAG00000013674	EDNRA
GO:1902285	semaphorin-plexin signaling pathway involved in neuron projection guidance	1	13	0.0913953	0.400616	ENSBTAG00000013674	EDNRA
GO:0003214	cardiac left ventricle morphogenesis	1	14	0.0980723	0.405515	ENSBTAG00000013674	EDNRA
GO:0060973	cell migration involved in heart development	1	15	0.104701	0.413044	ENSBTAG00000013674	EDNRA
GO:1905144	response to acetylcholine	1	15	0.104701	0.413044	ENSBTAG00000013674	EDNRA
GO:0061318	renal filtration cell differentiation	1	16	0.111281	0.422795	ENSBTAG00000013674	EDNRA
GO:0072012	glomerulus vasculature development	1	16	0.111281	0.422795	ENSBTAG00000013674	EDNRA
GO:0072112	glomerular visceral epithelial cell differentiation	1	16	0.111281	0.422795	ENSBTAG00000013674	EDNRA
GO:0003094	glomerular filtration	1	17	0.117813	0.433016	ENSBTAG00000013674	EDNRA
GO:0061437	renal system vasculature development	1	17	0.117813	0.433016	ENSBTAG00000013674	EDNRA
GO:0061440	kidney vasculature development	1	17	0.117813	0.433016	ENSBTAG00000013674	EDNRA
GO:0072311	glomerular epithelial cell differentiation	1	17	0.117813	0.433016	ENSBTAG00000013674	EDNRA
GO:0042474	middle ear morphogenesis	1	18	0.124297	0.437164	ENSBTAG00000013674	EDNRA
GO:0072010	glomerular epithelium development	1	18	0.124297	0.437164	ENSBTAG00000013674	EDNRA
GO:0007379	segment specification	1	19	0.130734	0.44589	ENSBTAG00000013674	EDNRA
GO:0097205	renal filtration	1	19	0.130734	0.44589	ENSBTAG00000013674	EDNRA
GO:0060384	innervation	1	20	0.137124	0.450796	ENSBTAG00000013674	EDNRA
GO:0070293	renal absorption	1	20	0.137124	0.450796	ENSBTAG00000013674	EDNRA
GO:0007350	blastoderm segmentation	1	21	0.143468	0.456453	ENSBTAG00000013674	EDNRA
GO:0035886	vascular associated smooth muscle cell differentiation	1	21	0.143468	0.456453	ENSBTAG00000013674	EDNRA
GO:0060037	pharyngeal system development	1	22	0.149765	0.457321	ENSBTAG00000013674	EDNRA
GO:0001556	oocyte maturation	1	23	0.156016	0.463933	ENSBTAG00000013674	EDNRA
GO:0030878	thyroid gland development	1	25	0.168383	0.474479	ENSBTAG00000013674	EDNRA
GO:0001974	blood vessel remodeling	1	27	0.180569	0.480233	ENSBTAG00000013674	EDNRA
GO:0001569	branching involved in blood vessel morphogenesis	1	29	0.192579	0.490671	ENSBTAG00000013674	EDNRA
GO:0006584	catecholamine metabolic process	1	29	0.192579	0.490671	ENSBTAG00000013674	EDNRA
GO:0009712	catechol-containing compound metabolic process	1	29	0.192579	0.490671	ENSBTAG00000013674	EDNRA
GO:0042551	neuron maturation	1	32	0.210266	0.509416	ENSBTAG00000013674	EDNRA
GO:2001259	positive regulation of cation channel activity	1	32	0.210266	0.509416	ENSBTAG00000013674	EDNRA
GO:0055010	ventricular cardiac muscle tissue morphogenesis	1	36	0.233252	0.519205	ENSBTAG00000013674	EDNRA
GO:0061028	establishment of endothelial barrier	1	37	0.238895	0.523577	ENSBTAG00000013674	EDNRA
GO:0035850	epithelial cell differentiation involved in kidney development	1	38	0.244496	0.52892	ENSBTAG00000013674	EDNRA
GO:0003229	ventricular cardiac muscle tissue development	1	42	0.266494	0.538677	ENSBTAG00000013674	EDNRA
GO:0048599	oocyte development	1	42	0.266494	0.538677	ENSBTAG00000013674	EDNRA
GO:0071526	semaphorin-plexin signaling pathway	1	42	0.266494	0.538677	ENSBTAG00000013674	EDNRA
GO:0009994	oocyte differentiation	1	44	0.277253	0.547958	ENSBTAG00000013674	EDNRA
GO:0060324	face development	1	44	0.277253	0.547958	ENSBTAG00000013674	EDNRA
GO:0007585	respiratory gaseous exchange by respiratory system	1	46	0.287856	0.55803	ENSBTAG00000013674	EDNRA
GO:0051145	smooth muscle cell differentiation	1	46	0.287856	0.55803	ENSBTAG00000013674	EDNRA
GO:0001885	endothelial cell development	1	48	0.298305	0.560947	ENSBTAG00000013674	EDNRA
GO:0055008	cardiac muscle tissue morphogenesis	1	48	0.298305	0.560947	ENSBTAG00000013674	EDNRA
GO:0032414	positive regulation of ion transmembrane transporter activity	1	53	0.323765	0.580131	ENSBTAG00000013674	EDNRA
GO:0060415	muscle tissue morphogenesis	1	53	0.323765	0.580131	ENSBTAG00000013674	EDNRA
GO:0003208	cardiac ventricle morphogenesis	1	55	0.333691	0.585506	ENSBTAG00000013674	EDNRA
GO:0035050	embryonic heart tube development	1	56	0.3386	0.58983	ENSBTAG00000013674	EDNRA
GO:0003151	outflow tract morphogenesis	1	58	0.34831	0.598294	ENSBTAG00000013674	EDNRA
GO:0032411	positive regulation of transporter activity	1	60	0.357878	0.602059	ENSBTAG00000013674	EDNRA
GO:0048644	muscle organ morphogenesis	1	60	0.357878	0.602059	ENSBTAG00000013674	EDNRA
GO:0021675	nerve development	1	62	0.367307	0.612264	ENSBTAG00000013674	EDNRA
GO:0006576	cellular biogenic amine metabolic process	1	63	0.37197	0.613128	ENSBTAG00000013674	EDNRA
GO:0002027	regulation of heart rate	1	68	0.394778	0.628325	ENSBTAG00000013674	EDNRA
GO:0048477	oogenesis	1	69	0.39924	0.628325	ENSBTAG00000013674	EDNRA
GO:0044106	cellular amine metabolic process	1	72	0.412431	0.638472	ENSBTAG00000013674	EDNRA
GO:0045446	endothelial cell differentiation	1	76	0.429573	0.647513	ENSBTAG00000013674	EDNRA
GO:0048675	axon extension	1	76	0.429573	0.647513	ENSBTAG00000013674	EDNRA
GO:1904064	positive regulation of cation transmembrane transport	1	77	0.43378	0.647797	ENSBTAG00000013674	EDNRA
GO:0009308	amine metabolic process	1	78	0.437957	0.648961	ENSBTAG00000013674	EDNRA
GO:0003158	endothelium development	1	85	0.46635	0.658482	ENSBTAG00000013674	EDNRA
GO:0034767	positive regulation of ion transmembrane transport	1	88	0.478078	0.665317	ENSBTAG00000013674	EDNRA
GO:0035282	segmentation	1	89	0.481931	0.665317	ENSBTAG00000013674	EDNRA
GO:0003231	cardiac ventricle development	1	92	0.49332	0.674964	ENSBTAG00000013674	EDNRA
GO:0035051	cardiocyte differentiation	1	94	0.500774	0.678495	ENSBTAG00000013674	EDNRA
GO:0003206	cardiac chamber morphogenesis	1	95	0.50446	0.681928	ENSBTAG00000013674	EDNRA
GO:0042471	ear morphogenesis	1	99	0.518937	0.688522	ENSBTAG00000013674	EDNRA
GO:2001257	regulation of cation channel activity	1	101	0.526017	0.6948	ENSBTAG00000013674	EDNRA
GO:0007292	female gamete generation	1	103	0.532994	0.697785	ENSBTAG00000013674	EDNRA
GO:0035270	endocrine system development	1	103	0.532994	0.697785	ENSBTAG00000013674	EDNRA
GO:1990138	neuron projection extension	1	113	0.566378	0.715378	ENSBTAG00000013674	EDNRA
GO:0008016	regulation of heart contraction	1	118	0.582172	0.725268	ENSBTAG00000013674	EDNRA
GO:0050905	neuromuscular process	1	119	0.585261	0.727199	ENSBTAG00000013674	EDNRA
GO:0055001	muscle cell development	1	121	0.591373	0.730574	ENSBTAG00000013674	EDNRA
GO:0003205	cardiac chamber development	1	124	0.600372	0.735242	ENSBTAG00000013674	EDNRA
GO:0048588	developmental cell growth	1	138	0.639839	0.762204	ENSBTAG00000013674	EDNRA
GO:0060047	heart contraction	1	142	0.650387	0.767814	ENSBTAG00000013674	EDNRA
GO:0001666	response to hypoxia	1	143	0.652976	0.769718	ENSBTAG00000013674	EDNRA
GO:0036293	response to decreased oxygen levels	1	144	0.655546	0.770828	ENSBTAG00000013674	EDNRA
GO:0003015	heart process	1	150	0.670573	0.776919	ENSBTAG00000013674	EDNRA
GO:0032412	regulation of ion transmembrane transporter activity	1	151	0.673013	0.777084	ENSBTAG00000013674	EDNRA
GO:1903046	meiotic cell cycle process	1	155	0.682597	0.784145	ENSBTAG00000013674	EDNRA
GO:0070482	response to oxygen levels	1	157	0.687284	0.788179	ENSBTAG00000013674	EDNRA
GO:0022898	regulation of transmembrane transporter activity	1	161	0.696453	0.791789	ENSBTAG00000013674	EDNRA
GO:0032409	regulation of transporter activity	1	172	0.720315	0.805759	ENSBTAG00000013674	EDNRA
GO:0051321	meiotic cell cycle	1	174	0.724449	0.807711	ENSBTAG00000013674	EDNRA
GO:0007411	axon guidance	1	179	0.734521	0.815484	ENSBTAG00000013674	EDNRA
GO:0097485	neuron projection guidance	1	181	0.738447	0.818233	ENSBTAG00000013674	EDNRA
GO:0003007	heart morphogenesis	1	186	0.748011	0.825043	ENSBTAG00000013674	EDNRA
GO:1904062	regulation of cation transmembrane transport	1	212	0.792425	0.856068	ENSBTAG00000013674	EDNRA
GO:0007517	muscle organ development	1	214	0.7955	0.857055	ENSBTAG00000013674	EDNRA
GO:0034765	regulation of ion transmembrane transport	1	289	0.883312	0.919033	ENSBTAG00000013674	EDNRA
GO:0016049	cell growth	1	296	0.889279	0.922162	ENSBTAG00000013674	EDNRA
GO:0007409	axonogenesis	1	315	0.903994	0.931542	ENSBTAG00000013674	EDNRA
GO:0061564	axon development	1	343	0.922213	0.941159	ENSBTAG00000013674	EDNRA
GO:0048667	cell morphogenesis involved in neuron differentiation	1	396	0.947821	0.959168	ENSBTAG00000013674	EDNRA
GO:0048812	neuron projection morphogenesis	1	430	0.95964	0.967405	ENSBTAG00000013674	EDNRA
GO:0120039	plasma membrane bounded cell projection morphogenesis	1	443	0.96342	0.970802	ENSBTAG00000013674	EDNRA
GO:0048858	cell projection morphogenesis	1	445	0.963969	0.970943	ENSBTAG00000013674	EDNRA
GO:0032990	cell part morphogenesis	1	460	0.967838	0.974425	ENSBTAG00000013674	EDNRA
GO:0006935	chemotaxis	1	468	0.96973	0.975769	ENSBTAG00000013674	EDNRA
GO:0042330	taxis	1	471	0.97041	0.975769	ENSBTAG00000013674	EDNRA
GO:0032989	cellular component morphogenesis	1	528	0.980806	0.984549	ENSBTAG00000013674	EDNRA
GO:0031175	neuron projection development	1	641	0.991898	0.993577	ENSBTAG00000013674	EDNRA
GO:0048666	neuron development	1	762	0.996804	0.997647	ENSBTAG00000013674	EDNRA
GO:0030182	neuron differentiation	1	942	0.999209	0.999632	ENSBTAG00000013674	EDNRA
GO:0007188	adenylate cyclase-modulating G protein-coupled receptor signaling pathway	3	177	0.141368	0.456453	ENSBTAG00000013674;ENSBTAG00000013848;ENSBTAG00000014788	EDNRA;ADGRD1;AKAP12
GO:0010737	protein kinase A signaling	2	22	0.0112248	0.320696	ENSBTAG00000013674;ENSBTAG00000014788	EDNRA;AKAP12
GO:0007193	adenylate cyclase-inhibiting G protein-coupled receptor signaling pathway	2	57	0.0657289	0.374892	ENSBTAG00000013674;ENSBTAG00000014788	EDNRA;AKAP12
GO:0000904	cell morphogenesis involved in differentiation	2	516	0.896185	0.926319	ENSBTAG00000013674;ENSBTAG00000016549	EDNRA;CARMIL1
GO:0003002	regionalization	3	288	0.354716	0.602059	ENSBTAG00000013674;ENSBTAG00000016071;ENSBTAG00000039916	EDNRA;HHIP;SMAD2
GO:0007389	pattern specification process	3	363	0.500256	0.678495	ENSBTAG00000013674;ENSBTAG00000016071;ENSBTAG00000039916	EDNRA;HHIP;SMAD2
GO:0048469	cell maturation	2	140	0.274614	0.547148	ENSBTAG00000013674;ENSBTAG00000018200	EDNRA;IL15
GO:0071695	anatomical structure maturation	2	184	0.392282	0.628325	ENSBTAG00000013674;ENSBTAG00000018200	EDNRA;IL15
GO:0021700	developmental maturation	2	226	0.496227	0.677341	ENSBTAG00000013674;ENSBTAG00000018200	EDNRA;IL15
GO:0018958	phenol-containing compound metabolic process	2	73	0.100465	0.410002	ENSBTAG00000013674;ENSBTAG00000015935	EDNRA;IYD
GO:0001755	neural crest cell migration	2	47	0.0466574	0.361821	ENSBTAG00000013674;ENSBTAG00000017549	EDNRA;KITLG
GO:0014032	neural crest cell development	2	67	0.0869093	0.400616	ENSBTAG00000013674;ENSBTAG00000017549	EDNRA;KITLG
GO:0014031	mesenchymal cell development	2	72	0.0981664	0.405515	ENSBTAG00000013674;ENSBTAG00000017549	EDNRA;KITLG
GO:0048864	stem cell development	2	73	0.100465	0.410002	ENSBTAG00000013674;ENSBTAG00000017549	EDNRA;KITLG
GO:0014033	neural crest cell differentiation	2	76	0.107451	0.419708	ENSBTAG00000013674;ENSBTAG00000017549	EDNRA;KITLG
GO:0048762	mesenchymal cell differentiation	3	179	0.144772	0.457321	ENSBTAG00000013674;ENSBTAG00000017549;ENSBTAG00000039916	EDNRA;KITLG;SMAD2
GO:0060485	mesenchyme development	3	214	0.208156	0.509416	ENSBTAG00000013674;ENSBTAG00000017549;ENSBTAG00000039916	EDNRA;KITLG;SMAD2
GO:0050877	nervous system process	5	1634	0.994428	0.99569	ENSBTAG00000013674;ENSBTAG00000046378;ENSBTAG00000051946;ENSBTAG00000052183;ENSBTAG00000052809	EDNRA;OR52A5EP;ENSBTAG00000051946;OR52S6;OR52A1E
GO:0030202	heparin metabolic process	2	14	0.00459449	0.320696	ENSBTAG00000013674;ENSBTAG00000034522	EDNRA;SLC10A7
GO:0009880	embryonic pattern specification	2	59	0.0698094	0.376331	ENSBTAG00000013674;ENSBTAG00000039916	EDNRA;SMAD2
GO:0001837	epithelial to mesenchymal transition	2	113	0.201497	0.504168	ENSBTAG00000013674;ENSBTAG00000039916	EDNRA;SMAD2
GO:0048485	sympathetic nervous system development	2	15	0.00527596	0.320696	ENSBTAG00000013674;ENSBTAG00000020426	EDNRA;TFAP2B
GO:0055078	sodium ion homeostasis	2	32	0.0229809	0.334809	ENSBTAG00000013674;ENSBTAG00000020426	EDNRA;TFAP2B
GO:0048483	autonomic nervous system development	2	35	0.0271783	0.334809	ENSBTAG00000013674;ENSBTAG00000020426	EDNRA;TFAP2B
GO:0035904	aorta development	2	41	0.0364076	0.348894	ENSBTAG00000013674;ENSBTAG00000020426	EDNRA;TFAP2B
GO:0048844	artery morphogenesis	2	50	0.0521323	0.364984	ENSBTAG00000013674;ENSBTAG00000020426	EDNRA;TFAP2B
GO:0060840	artery development	2	71	0.0958829	0.405515	ENSBTAG00000013674;ENSBTAG00000020426	EDNRA;TFAP2B
GO:0003014	renal system process	2	72	0.0981664	0.405515	ENSBTAG00000013674;ENSBTAG00000020426	EDNRA;TFAP2B
GO:0090596	sensory organ morphogenesis	2	221	0.484432	0.668211	ENSBTAG00000013674;ENSBTAG00000020426	EDNRA;TFAP2B
GO:0097010	eukaryotic translation initiation factor 4F complex assembly	1	2	0.0146325	0.320696	ENSBTAG00000006883	EIF4B
GO:0034625	fatty acid elongation, monounsaturated fatty acid	1	4	0.0290526	0.334809	ENSBTAG00000003359	ELOVL5
GO:0034626	fatty acid elongation, polyunsaturated fatty acid	1	6	0.0432634	0.3507	ENSBTAG00000003359	ELOVL5
GO:0019368	fatty acid elongation, unsaturated fatty acid	1	7	0.0502912	0.361821	ENSBTAG00000003359	ELOVL5
GO:0019367	fatty acid elongation, saturated fatty acid	1	8	0.0572677	0.364984	ENSBTAG00000003359	ELOVL5
GO:0042761	very long-chain fatty acid biosynthetic process	1	12	0.0846693	0.400616	ENSBTAG00000003359	ELOVL5
GO:0030497	fatty acid elongation	1	13	0.0913953	0.400616	ENSBTAG00000003359	ELOVL5
GO:0045723	positive regulation of fatty acid biosynthetic process	1	18	0.124297	0.437164	ENSBTAG00000003359	ELOVL5
GO:0000038	very long-chain fatty acid metabolic process	1	25	0.168383	0.474479	ENSBTAG00000003359	ELOVL5
GO:0045923	positive regulation of fatty acid metabolic process	1	26	0.174498	0.4775	ENSBTAG00000003359	ELOVL5
GO:0042304	regulation of fatty acid biosynthetic process	1	35	0.227569	0.513438	ENSBTAG00000003359	ELOVL5
GO:0046889	positive regulation of lipid biosynthetic process	1	57	0.343473	0.594528	ENSBTAG00000003359	ELOVL5
GO:0019217	regulation of fatty acid metabolic process	1	68	0.394778	0.628325	ENSBTAG00000003359	ELOVL5
GO:0010565	regulation of cellular ketone metabolic process	1	96	0.508119	0.682974	ENSBTAG00000003359	ELOVL5
GO:0045834	positive regulation of lipid metabolic process	1	101	0.526017	0.6948	ENSBTAG00000003359	ELOVL5
GO:0046890	regulation of lipid biosynthetic process	1	123	0.597395	0.734181	ENSBTAG00000003359	ELOVL5
GO:0042180	cellular ketone metabolic process	1	160	0.694186	0.791111	ENSBTAG00000003359	ELOVL5
GO:0019216	regulation of lipid metabolic process	1	242	0.834098	0.884151	ENSBTAG00000003359	ELOVL5
GO:0006629	lipid metabolic process	6	1050	0.790501	0.854781	ENSBTAG00000003359;ENSBTAG00000004982;ENSBTAG00000005479;ENSBTAG00000007159;ENSBTAG00000013718;ENSBTAG00000014111	ELOVL5;GPLD1;LIPC;ESR1;GC;INPP4B
GO:0044255	cellular lipid metabolic process	4	787	0.835449	0.884396	ENSBTAG00000003359;ENSBTAG00000004982;ENSBTAG00000005479;ENSBTAG00000014111	ELOVL5;GPLD1;LIPC;INPP4B
GO:0006633	fatty acid biosynthetic process	2	105	0.180262	0.480233	ENSBTAG00000003359;ENSBTAG00000005479	ELOVL5;LIPC
GO:0072330	monocarboxylic acid biosynthetic process	2	134	0.258282	0.537786	ENSBTAG00000003359;ENSBTAG00000005479	ELOVL5;LIPC
GO:0006631	fatty acid metabolic process	2	278	0.608354	0.741109	ENSBTAG00000003359;ENSBTAG00000005479	ELOVL5;LIPC
GO:0008610	lipid biosynthetic process	3	488	0.699438	0.793278	ENSBTAG00000003359;ENSBTAG00000005479;ENSBTAG00000014111	ELOVL5;LIPC;INPP4B
GO:0046394	carboxylic acid biosynthetic process	3	223	0.225379	0.513438	ENSBTAG00000003359;ENSBTAG00000005479;ENSBTAG00000009846	ELOVL5;LIPC;MTHFD1L
GO:0016053	organic acid biosynthetic process	3	226	0.231183	0.518192	ENSBTAG00000003359;ENSBTAG00000005479;ENSBTAG00000009846	ELOVL5;LIPC;MTHFD1L
GO:0044283	small molecule biosynthetic process	3	418	0.595936	0.733859	ENSBTAG00000003359;ENSBTAG00000005479;ENSBTAG00000009846	ELOVL5;LIPC;MTHFD1L
GO:1903955	positive regulation of protein targeting to mitochondrion	1	7	0.0502912	0.361821	ENSBTAG00000006398	ENSBTAG00000006398
GO:1903749	positive regulation of establishment of protein localization to mitochondrion	1	8	0.0572677	0.364984	ENSBTAG00000006398	ENSBTAG00000006398
GO:1903214	regulation of protein targeting to mitochondrion	1	14	0.0980723	0.405515	ENSBTAG00000006398	ENSBTAG00000006398
GO:1903747	regulation of establishment of protein localization to mitochondrion	1	16	0.111281	0.422795	ENSBTAG00000006398	ENSBTAG00000006398
GO:0030150	protein import into mitochondrial matrix	1	19	0.130734	0.44589	ENSBTAG00000006398	ENSBTAG00000006398
GO:0044743	protein transmembrane import into intracellular organelle	1	34	0.221843	0.513438	ENSBTAG00000006398	ENSBTAG00000006398
GO:1903533	regulation of protein targeting	1	36	0.233252	0.519205	ENSBTAG00000006398	ENSBTAG00000006398
GO:0006626	protein targeting to mitochondrion	1	59	0.353111	0.601738	ENSBTAG00000006398	ENSBTAG00000006398
GO:0072655	establishment of protein localization to mitochondrion	1	70	0.403669	0.631934	ENSBTAG00000006398	ENSBTAG00000006398
GO:0070585	protein localization to mitochondrion	1	75	0.425334	0.645307	ENSBTAG00000006398	ENSBTAG00000006398
GO:0017038	protein import	1	163	0.700937	0.793574	ENSBTAG00000006398	ENSBTAG00000006398
GO:1903829	positive regulation of cellular protein localization	1	195	0.764361	0.836837	ENSBTAG00000006398	ENSBTAG00000006398
GO:0051050	positive regulation of transport	7	546	0.107454	0.419708	ENSBTAG00000006398;ENSBTAG00000007450;ENSBTAG00000009552;ENSBTAG00000012628;ENSBTAG00000013674;ENSBTAG00000018200;ENSBTAG00000021029	ENSBTAG00000006398;C2;ATP2B1;SLC1A2;EDNRA;IL15;PRR5L
GO:0046907	intracellular transport	7	1110	0.714148	0.802653	ENSBTAG00000006398;ENSBTAG00000006556;ENSBTAG00000009112;ENSBTAG00000014490;ENSBTAG00000018180;ENSBTAG00000021029;ENSBTAG00000021872	ENSBTAG00000006398;COPB1;TRAM2;DDX39B;C5H12orf50;PRR5L;RASGRP1
GO:0006886	intracellular protein transport	4	600	0.646849	0.766528	ENSBTAG00000006398;ENSBTAG00000006556;ENSBTAG00000009112;ENSBTAG00000021029	ENSBTAG00000006398;COPB1;TRAM2;PRR5L
GO:1903827	regulation of cellular protein localization	3	378	0.527489	0.696356	ENSBTAG00000006398;ENSBTAG00000013674;ENSBTAG00000021029	ENSBTAG00000006398;EDNRA;PRR5L
GO:0060341	regulation of cellular localization	3	551	0.774434	0.84422	ENSBTAG00000006398;ENSBTAG00000013674;ENSBTAG00000021029	ENSBTAG00000006398;EDNRA;PRR5L
GO:0032880	regulation of protein localization	5	595	0.444377	0.650369	ENSBTAG00000006398;ENSBTAG00000013674;ENSBTAG00000015119;ENSBTAG00000020426;ENSBTAG00000021029	ENSBTAG00000006398;EDNRA;SIK3;TFAP2B;PRR5L
GO:0090316	positive regulation of intracellular protein transport	2	97	0.159412	0.470564	ENSBTAG00000006398;ENSBTAG00000021029	ENSBTAG00000006398;PRR5L
GO:0032388	positive regulation of intracellular transport	2	124	0.231119	0.518192	ENSBTAG00000006398;ENSBTAG00000021029	ENSBTAG00000006398;PRR5L
GO:0033157	regulation of intracellular protein transport	2	144	0.285496	0.557566	ENSBTAG00000006398;ENSBTAG00000021029	ENSBTAG00000006398;PRR5L
GO:0051222	positive regulation of protein transport	2	180	0.381868	0.618249	ENSBTAG00000006398;ENSBTAG00000021029	ENSBTAG00000006398;PRR5L
GO:1904951	positive regulation of establishment of protein localization	2	195	0.420508	0.643837	ENSBTAG00000006398;ENSBTAG00000021029	ENSBTAG00000006398;PRR5L
GO:0032386	regulation of intracellular transport	2	219	0.479667	0.665317	ENSBTAG00000006398;ENSBTAG00000021029	ENSBTAG00000006398;PRR5L
GO:0051223	regulation of protein transport	3	310	0.398602	0.628325	ENSBTAG00000006398;ENSBTAG00000020426;ENSBTAG00000021029	ENSBTAG00000006398;TFAP2B;PRR5L
GO:0070201	regulation of establishment of protein localization	3	332	0.441677	0.650369	ENSBTAG00000006398;ENSBTAG00000020426;ENSBTAG00000021029	ENSBTAG00000006398;TFAP2B;PRR5L
GO:0065002	intracellular protein transmembrane transport	2	47	0.0466574	0.361821	ENSBTAG00000006398;ENSBTAG00000009112	ENSBTAG00000006398;TRAM2
GO:0006605	protein targeting	2	197	0.42557	0.645307	ENSBTAG00000006398;ENSBTAG00000009112	ENSBTAG00000006398;TRAM2
GO:0071806	protein transmembrane transport	3	50	0.00589176	0.320696	ENSBTAG00000006398;ENSBTAG00000009112;ENSBTAG00000013674	ENSBTAG00000006398;TRAM2;EDNRA
GO:0019882	antigen processing and presentation	3	97	0.0346049	0.348894	ENSBTAG00000007075;ENSBTAG00000009656;ENSBTAG00000038619	ENSBTAG00000007075;ENSBTAG00000009656;ENSBTAG00000038619
GO:0002428	antigen processing and presentation of peptide antigen via MHC class Ib	2	9	0.00186179	0.320696	ENSBTAG00000007075;ENSBTAG00000038619	ENSBTAG00000007075;ENSBTAG00000038619
GO:0002476	antigen processing and presentation of endogenous peptide antigen via MHC class Ib	2	9	0.00186179	0.320696	ENSBTAG00000007075;ENSBTAG00000038619	ENSBTAG00000007075;ENSBTAG00000038619
GO:0002483	antigen processing and presentation of endogenous peptide antigen	2	17	0.00676845	0.320696	ENSBTAG00000007075;ENSBTAG00000038619	ENSBTAG00000007075;ENSBTAG00000038619
GO:0002475	antigen processing and presentation via MHC class Ib	2	21	0.0102532	0.320696	ENSBTAG00000007075;ENSBTAG00000038619	ENSBTAG00000007075;ENSBTAG00000038619
GO:0019883	antigen processing and presentation of endogenous antigen	2	29	0.019081	0.334809	ENSBTAG00000007075;ENSBTAG00000038619	ENSBTAG00000007075;ENSBTAG00000038619
GO:0048002	antigen processing and presentation of peptide antigen	2	48	0.0484575	0.361821	ENSBTAG00000007075;ENSBTAG00000038619	ENSBTAG00000007075;ENSBTAG00000038619
GO:0006880	intracellular sequestering of iron ion	1	14	0.0980723	0.405515	ENSBTAG00000038430	ENSBTAG00000038430
GO:0097577	sequestering of iron ion	1	15	0.104701	0.413044	ENSBTAG00000038430	ENSBTAG00000038430
GO:0051238	sequestering of metal ion	1	23	0.156016	0.463933	ENSBTAG00000038430	ENSBTAG00000038430
GO:0006826	iron ion transport	1	55	0.333691	0.585506	ENSBTAG00000038430	ENSBTAG00000038430
GO:0006879	cellular iron ion homeostasis	1	66	0.385755	0.62199	ENSBTAG00000038430	ENSBTAG00000038430
GO:0055072	iron ion homeostasis	1	77	0.43378	0.647797	ENSBTAG00000038430	ENSBTAG00000038430
GO:0000041	transition metal ion transport	1	87	0.474198	0.663372	ENSBTAG00000038430	ENSBTAG00000038430
GO:0046916	cellular transition metal ion homeostasis	1	94	0.500774	0.678495	ENSBTAG00000038430	ENSBTAG00000038430
GO:0055076	transition metal ion homeostasis	1	109	0.553319	0.709867	ENSBTAG00000038430	ENSBTAG00000038430
GO:0051651	maintenance of location in cell	1	166	0.70754	0.797878	ENSBTAG00000038430	ENSBTAG00000038430
GO:0051235	maintenance of location	1	243	0.835334	0.884396	ENSBTAG00000038430	ENSBTAG00000038430
GO:0050852	T cell receptor signaling pathway	1	91	0.489551	0.673066	ENSBTAG00000048304	ENSBTAG00000048304
GO:0050851	antigen receptor-mediated signaling pathway	1	143	0.652976	0.769718	ENSBTAG00000048304	ENSBTAG00000048304
GO:0060523	prostate epithelial cord elongation	1	2	0.0146325	0.320696	ENSBTAG00000007159	ESR1
GO:0060737	prostate gland morphogenetic growth	1	3	0.0218689	0.334809	ENSBTAG00000007159	ESR1
GO:0045899	positive regulation of RNA polymerase II transcription preinitiation complex assembly	1	4	0.0290526	0.334809	ENSBTAG00000007159	ESR1
GO:0060750	epithelial cell proliferation involved in mammary gland duct elongation	1	4	0.0290526	0.334809	ENSBTAG00000007159	ESR1
GO:0060526	prostate glandular acinus morphogenesis	1	5	0.036184	0.348894	ENSBTAG00000007159	ESR1
GO:0060527	prostate epithelial cord arborization involved in prostate glandular acinus morphogenesis	1	5	0.036184	0.348894	ENSBTAG00000007159	ESR1
GO:0060687	regulation of branching involved in prostate gland morphogenesis	1	5	0.036184	0.348894	ENSBTAG00000007159	ESR1
GO:0060751	branch elongation involved in mammary gland duct branching	1	5	0.036184	0.348894	ENSBTAG00000007159	ESR1
GO:0045898	regulation of RNA polymerase II transcription preinitiation complex assembly	1	6	0.0432634	0.3507	ENSBTAG00000007159	ESR1
GO:0060745	mammary gland branching involved in pregnancy	1	6	0.0432634	0.3507	ENSBTAG00000007159	ESR1
GO:0060068	vagina development	1	8	0.0572677	0.364984	ENSBTAG00000007159	ESR1
GO:0060736	prostate gland growth	1	8	0.0572677	0.364984	ENSBTAG00000007159	ESR1
GO:0060525	prostate glandular acinus development	1	9	0.0641935	0.369698	ENSBTAG00000007159	ESR1
GO:0001547	antral ovarian follicle growth	1	10	0.0710688	0.376331	ENSBTAG00000007159	ESR1
GO:0060442	branching involved in prostate gland morphogenesis	1	11	0.0778939	0.388915	ENSBTAG00000007159	ESR1
GO:1903799	negative regulation of production of miRNAs involved in gene silencing by miRNA	1	13	0.0913953	0.400616	ENSBTAG00000007159	ESR1
GO:0030540	female genitalia development	1	14	0.0980723	0.405515	ENSBTAG00000007159	ESR1
GO:0071391	cellular response to estrogen stimulus	1	14	0.0980723	0.405515	ENSBTAG00000007159	ESR1
GO:0060965	negative regulation of gene silencing by miRNA	1	16	0.111281	0.422795	ENSBTAG00000007159	ESR1
GO:0071392	cellular response to estradiol stimulus	1	16	0.111281	0.422795	ENSBTAG00000007159	ESR1
GO:0008209	androgen metabolic process	1	18	0.124297	0.437164	ENSBTAG00000007159	ESR1
GO:0060149	negative regulation of posttranscriptional gene silencing	1	18	0.124297	0.437164	ENSBTAG00000007159	ESR1
GO:0060602	branch elongation of an epithelium	1	18	0.124297	0.437164	ENSBTAG00000007159	ESR1
GO:0060749	mammary gland alveolus development	1	18	0.124297	0.437164	ENSBTAG00000007159	ESR1
GO:0060967	negative regulation of gene silencing by RNA	1	18	0.124297	0.437164	ENSBTAG00000007159	ESR1
GO:0061377	mammary gland lobule development	1	18	0.124297	0.437164	ENSBTAG00000007159	ESR1
GO:0060065	uterus development	1	19	0.130734	0.44589	ENSBTAG00000007159	ESR1
GO:0060444	branching involved in mammary gland duct morphogenesis	1	21	0.143468	0.456453	ENSBTAG00000007159	ESR1
GO:1903798	regulation of production of miRNAs involved in gene silencing by miRNA	1	21	0.143468	0.456453	ENSBTAG00000007159	ESR1
GO:0070920	regulation of production of small RNA involved in gene silencing by RNA	1	22	0.149765	0.457321	ENSBTAG00000007159	ESR1
GO:0060740	prostate gland epithelium morphogenesis	1	23	0.156016	0.463933	ENSBTAG00000007159	ESR1
GO:0060512	prostate gland morphogenesis	1	24	0.162222	0.470564	ENSBTAG00000007159	ESR1
GO:0060969	negative regulation of gene silencing	1	24	0.162222	0.470564	ENSBTAG00000007159	ESR1
GO:0033598	mammary gland epithelial cell proliferation	1	25	0.168383	0.474479	ENSBTAG00000007159	ESR1
GO:0003401	axis elongation	1	26	0.174498	0.4775	ENSBTAG00000007159	ESR1
GO:0032355	response to estradiol	1	26	0.174498	0.4775	ENSBTAG00000007159	ESR1
GO:0022602	ovulation cycle process	1	29	0.192579	0.490671	ENSBTAG00000007159	ESR1
GO:0051123	RNA polymerase II preinitiation complex assembly	1	29	0.192579	0.490671	ENSBTAG00000007159	ESR1
GO:0060603	mammary gland duct morphogenesis	1	29	0.192579	0.490671	ENSBTAG00000007159	ESR1
GO:0060135	maternal process involved in female pregnancy	1	30	0.198518	0.500402	ENSBTAG00000007159	ESR1
GO:0043627	response to estrogen	1	33	0.216076	0.513438	ENSBTAG00000007159	ESR1
GO:0060964	regulation of gene silencing by miRNA	1	34	0.221843	0.513438	ENSBTAG00000007159	ESR1
GO:0071168	protein localization to chromatin	1	34	0.221843	0.513438	ENSBTAG00000007159	ESR1
GO:0030850	prostate gland development	1	35	0.227569	0.513438	ENSBTAG00000007159	ESR1
GO:0042698	ovulation cycle	1	35	0.227569	0.513438	ENSBTAG00000007159	ESR1
GO:0030520	intracellular estrogen receptor signaling pathway	1	37	0.238895	0.523577	ENSBTAG00000007159	ESR1
GO:0048146	positive regulation of fibroblast proliferation	1	37	0.238895	0.523577	ENSBTAG00000007159	ESR1
GO:0060147	regulation of posttranscriptional gene silencing	1	38	0.244496	0.52892	ENSBTAG00000007159	ESR1
GO:0060966	regulation of gene silencing by RNA	1	39	0.250056	0.532406	ENSBTAG00000007159	ESR1
GO:0043124	negative regulation of I-kappaB kinase/NF-kappaB signaling	1	40	0.255575	0.536776	ENSBTAG00000007159	ESR1
GO:0060443	mammary gland morphogenesis	1	41	0.261054	0.537786	ENSBTAG00000007159	ESR1
GO:0001541	ovarian follicle development	1	42	0.266494	0.538677	ENSBTAG00000007159	ESR1
GO:0070897	transcription preinitiation complex assembly	1	44	0.277253	0.547958	ENSBTAG00000007159	ESR1
GO:0035196	production of miRNAs involved in gene silencing by miRNA	1	46	0.287856	0.55803	ENSBTAG00000007159	ESR1
GO:0031050	dsRNA processing	1	50	0.308601	0.568893	ENSBTAG00000007159	ESR1
GO:0070918	production of small RNA involved in gene silencing by RNA	1	50	0.308601	0.568893	ENSBTAG00000007159	ESR1
GO:0061180	mammary gland epithelium development	1	60	0.357878	0.602059	ENSBTAG00000007159	ESR1
GO:0048145	regulation of fibroblast proliferation	1	61	0.36261	0.606342	ENSBTAG00000007159	ESR1
GO:0060968	regulation of gene silencing	1	61	0.36261	0.606342	ENSBTAG00000007159	ESR1
GO:0035195	gene silencing by miRNA	1	69	0.39924	0.628325	ENSBTAG00000007159	ESR1
GO:0008585	female gonad development	1	73	0.416763	0.640987	ENSBTAG00000007159	ESR1
GO:0048144	fibroblast proliferation	1	73	0.416763	0.640987	ENSBTAG00000007159	ESR1
GO:0007565	female pregnancy	1	75	0.425334	0.645307	ENSBTAG00000007159	ESR1
GO:0046545	development of primary female sexual characteristics	1	75	0.425334	0.645307	ENSBTAG00000007159	ESR1
GO:0035194	post-transcriptional gene silencing by RNA	1	76	0.429573	0.647513	ENSBTAG00000007159	ESR1
GO:0016441	posttranscriptional gene silencing	1	78	0.437957	0.648961	ENSBTAG00000007159	ESR1
GO:0044706	multi-multicellular organism process	1	87	0.474198	0.663372	ENSBTAG00000007159	ESR1
GO:0046660	female sex differentiation	1	87	0.474198	0.663372	ENSBTAG00000007159	ESR1
GO:0034754	cellular hormone metabolic process	1	98	0.515357	0.685694	ENSBTAG00000007159	ESR1
GO:0022612	gland morphogenesis	1	99	0.518937	0.688522	ENSBTAG00000007159	ESR1
GO:0030879	mammary gland development	1	100	0.52249	0.692377	ENSBTAG00000007159	ESR1
GO:0043122	regulation of I-kappaB kinase/NF-kappaB signaling	1	172	0.720315	0.805759	ENSBTAG00000007159	ESR1
GO:0050727	regulation of inflammatory response	1	230	0.818531	0.872338	ENSBTAG00000007159	ESR1
GO:0031334	positive regulation of protein-containing complex assembly	2	186	0.397461	0.628325	ENSBTAG00000007159;ENSBTAG00000016549	ESR1;CARMIL1
GO:0044089	positive regulation of cellular component biogenesis	2	422	0.819858	0.872992	ENSBTAG00000007159;ENSBTAG00000016549	ESR1;CARMIL1
GO:0060560	developmental growth involved in morphogenesis	2	167	0.347538	0.598294	ENSBTAG00000007159;ENSBTAG00000013674	ESR1;EDNRA
GO:0002064	epithelial cell development	2	180	0.381868	0.618249	ENSBTAG00000007159;ENSBTAG00000013674	ESR1;EDNRA
GO:0007249	I-kappaB kinase/NF-kappaB signaling	2	197	0.42557	0.645307	ENSBTAG00000007159;ENSBTAG00000013674	ESR1;EDNRA
GO:0048732	gland development	2	293	0.637006	0.760919	ENSBTAG00000007159;ENSBTAG00000013674	ESR1;EDNRA
GO:0048863	stem cell differentiation	3	187	0.158653	0.470564	ENSBTAG00000007159;ENSBTAG00000013674;ENSBTAG00000017549	ESR1;EDNRA;KITLG
GO:2000241	regulation of reproductive process	2	138	0.26917	0.543159	ENSBTAG00000007159;ENSBTAG00000008148	ESR1;GCM1
GO:0042445	hormone metabolic process	2	166	0.34487	0.595845	ENSBTAG00000007159;ENSBTAG00000015935	ESR1;IYD
GO:0010817	regulation of hormone levels	4	342	0.243361	0.52892	ENSBTAG00000007159;ENSBTAG00000015935;ENSBTAG00000020426;ENSBTAG00000039916	ESR1;IYD;TFAP2B;SMAD2
GO:0008584	male gonad development	2	98	0.161993	0.470564	ENSBTAG00000007159;ENSBTAG00000017549	ESR1;KITLG
GO:0046546	development of primary male sexual characteristics	2	99	0.164582	0.473923	ENSBTAG00000007159;ENSBTAG00000017549	ESR1;KITLG
GO:0008406	gonad development	2	157	0.320718	0.580131	ENSBTAG00000007159;ENSBTAG00000017549	ESR1;KITLG
GO:0045137	development of primary sexual characteristics	2	160	0.328795	0.582093	ENSBTAG00000007159;ENSBTAG00000017549	ESR1;KITLG
GO:0030518	intracellular steroid hormone receptor signaling pathway	3	82	0.0224833	0.334809	ENSBTAG00000007159;ENSBTAG00000013541;ENSBTAG00000015016	ESR1;LMO3;CALCOCO1
GO:0043401	steroid hormone mediated signaling pathway	3	91	0.0294213	0.334809	ENSBTAG00000007159;ENSBTAG00000013541;ENSBTAG00000015016	ESR1;LMO3;CALCOCO1
GO:0071383	cellular response to steroid hormone stimulus	3	122	0.060854	0.369698	ENSBTAG00000007159;ENSBTAG00000013541;ENSBTAG00000015016	ESR1;LMO3;CALCOCO1
GO:0009755	hormone-mediated signaling pathway	3	124	0.0632645	0.369698	ENSBTAG00000007159;ENSBTAG00000013541;ENSBTAG00000015016	ESR1;LMO3;CALCOCO1
GO:0048545	response to steroid hormone	3	144	0.0896943	0.400616	ENSBTAG00000007159;ENSBTAG00000013541;ENSBTAG00000015016	ESR1;LMO3;CALCOCO1
GO:0030522	intracellular receptor signaling pathway	3	190	0.163962	0.473923	ENSBTAG00000007159;ENSBTAG00000013541;ENSBTAG00000015016	ESR1;LMO3;CALCOCO1
GO:1904035	regulation of epithelial cell apoptotic process	2	68	0.0891279	0.400616	ENSBTAG00000007159;ENSBTAG00000011237	ESR1;PKHD1
GO:0043433	negative regulation of DNA-binding transcription factor activity	2	125	0.233828	0.519205	ENSBTAG00000007159;ENSBTAG00000011237	ESR1;PKHD1
GO:1902532	negative regulation of intracellular signal transduction	4	404	0.34513	0.595859	ENSBTAG00000007159;ENSBTAG00000011237;ENSBTAG00000013541;ENSBTAG00000014490	ESR1;PKHD1;LMO3;DDX39B
GO:0008284	positive regulation of cell population proliferation	6	622	0.306892	0.568893	ENSBTAG00000007159;ENSBTAG00000011237;ENSBTAG00000011914;ENSBTAG00000017549;ENSBTAG00000018200;ENSBTAG00000020426	ESR1;PKHD1;RASSF10;KITLG;IL15;TFAP2B
GO:0051090	regulation of DNA-binding transcription factor activity	3	327	0.43198	0.647797	ENSBTAG00000007159;ENSBTAG00000011237;ENSBTAG00000035744	ESR1;PKHD1;TRIM26
GO:0000122	negative regulation of transcription by RNA polymerase II	3	714	0.900195	0.928566	ENSBTAG00000007159;ENSBTAG00000020426;ENSBTAG00000031917	ESR1;TFAP2B;SCAF8
GO:0051091	positive regulation of DNA-binding transcription factor activity	2	206	0.448061	0.65145	ENSBTAG00000007159;ENSBTAG00000035744	ESR1;TRIM26
GO:0034502	protein localization to chromosome	2	90	0.141579	0.456453	ENSBTAG00000007159;ENSBTAG00000012738	ESR1;ZNF827
GO:0043254	regulation of protein-containing complex assembly	3	335	0.447465	0.651384	ENSBTAG00000007159;ENSBTAG00000012738;ENSBTAG00000016549	ESR1;ZNF827;CARMIL1
GO:0044087	regulation of cellular component biogenesis	3	755	0.919812	0.940237	ENSBTAG00000007159;ENSBTAG00000012738;ENSBTAG00000016549	ESR1;ZNF827;CARMIL1
GO:0038030	non-canonical Wnt signaling pathway via MAPK cascade	1	5	0.036184	0.348894	ENSBTAG00000007047	FZD10
GO:0038031	non-canonical Wnt signaling pathway via JNK cascade	1	5	0.036184	0.348894	ENSBTAG00000007047	FZD10
GO:0034260	negative regulation of GTPase activity	1	21	0.143468	0.456453	ENSBTAG00000007047	FZD10
GO:0035567	non-canonical Wnt signaling pathway	1	40	0.255575	0.536776	ENSBTAG00000007047	FZD10
GO:0051346	negative regulation of hydrolase activity	1	271	0.866462	0.906281	ENSBTAG00000007047	FZD10
GO:0043086	negative regulation of catalytic activity	1	543	0.982877	0.98621	ENSBTAG00000007047	FZD10
GO:0032956	regulation of actin cytoskeleton organization	2	288	0.62764	0.756097	ENSBTAG00000007047;ENSBTAG00000016549	FZD10;CARMIL1
GO:0032970	regulation of actin filament-based process	2	312	0.67093	0.776953	ENSBTAG00000007047;ENSBTAG00000016549	FZD10;CARMIL1
GO:0051493	regulation of cytoskeleton organization	2	430	0.827916	0.879963	ENSBTAG00000007047;ENSBTAG00000016549	FZD10;CARMIL1
GO:0030036	actin cytoskeleton organization	2	575	0.927504	0.944665	ENSBTAG00000007047;ENSBTAG00000016549	FZD10;CARMIL1
GO:0030029	actin filament-based process	2	635	0.950118	0.960671	ENSBTAG00000007047;ENSBTAG00000016549	FZD10;CARMIL1
GO:0044092	negative regulation of molecular function	3	783	0.931133	0.947138	ENSBTAG00000007047;ENSBTAG00000007159;ENSBTAG00000011237	FZD10;ESR1;PKHD1
GO:0044093	positive regulation of molecular function	11	1085	0.173407	0.4775	ENSBTAG00000007047;ENSBTAG00000007159;ENSBTAG00000009150;ENSBTAG00000013674;ENSBTAG00000014253;ENSBTAG00000014272;ENSBTAG00000017549;ENSBTAG00000018951;ENSBTAG00000020079;ENSBTAG00000021872;ENSBTAG00000035744	FZD10;ESR1;SPON1;EDNRA;TBC1D22B;MMUT;KITLG;TBC1D9;MAP3K4;RASGRP1;TRIM26
GO:0001934	positive regulation of protein phosphorylation	6	540	0.206226	0.509416	ENSBTAG00000007047;ENSBTAG00000017549;ENSBTAG00000018200;ENSBTAG00000020079;ENSBTAG00000021029;ENSBTAG00000021872	FZD10;KITLG;IL15;MAP3K4;PRR5L;RASGRP1
GO:0043406	positive regulation of MAP kinase activity	4	81	0.00298117	0.320696	ENSBTAG00000007047;ENSBTAG00000017549;ENSBTAG00000020079;ENSBTAG00000021872	FZD10;KITLG;MAP3K4;RASGRP1
GO:0043405	regulation of MAP kinase activity	4	132	0.0162861	0.334809	ENSBTAG00000007047;ENSBTAG00000017549;ENSBTAG00000020079;ENSBTAG00000021872	FZD10;KITLG;MAP3K4;RASGRP1
GO:0071902	positive regulation of protein serine/threonine kinase activity	4	148	0.0236731	0.334809	ENSBTAG00000007047;ENSBTAG00000017549;ENSBTAG00000020079;ENSBTAG00000021872	FZD10;KITLG;MAP3K4;RASGRP1
GO:0045860	positive regulation of protein kinase activity	4	275	0.144245	0.456453	ENSBTAG00000007047;ENSBTAG00000017549;ENSBTAG00000020079;ENSBTAG00000021872	FZD10;KITLG;MAP3K4;RASGRP1
GO:0033674	positive regulation of kinase activity	4	330	0.224471	0.513438	ENSBTAG00000007047;ENSBTAG00000017549;ENSBTAG00000020079;ENSBTAG00000021872	FZD10;KITLG;MAP3K4;RASGRP1
GO:0043410	positive regulation of MAPK cascade	4	339	0.238603	0.523577	ENSBTAG00000007047;ENSBTAG00000017549;ENSBTAG00000020079;ENSBTAG00000021872	FZD10;KITLG;MAP3K4;RASGRP1
GO:0051347	positive regulation of transferase activity	4	397	0.333444	0.585506	ENSBTAG00000007047;ENSBTAG00000017549;ENSBTAG00000020079;ENSBTAG00000021872	FZD10;KITLG;MAP3K4;RASGRP1
GO:0043507	positive regulation of JUN kinase activity	2	33	0.0243477	0.334809	ENSBTAG00000007047;ENSBTAG00000020079	FZD10;MAP3K4
GO:0043506	regulation of JUN kinase activity	2	43	0.0397161	0.3507	ENSBTAG00000007047;ENSBTAG00000020079	FZD10;MAP3K4
GO:0001932	regulation of protein phosphorylation	7	803	0.376537	0.61482	ENSBTAG00000007047;ENSBTAG00000009070;ENSBTAG00000017549;ENSBTAG00000018200;ENSBTAG00000020079;ENSBTAG00000021029;ENSBTAG00000021872	FZD10;NPFFR2;KITLG;IL15;MAP3K4;PRR5L;RASGRP1
GO:0071900	regulation of protein serine/threonine kinase activity	5	264	0.0452799	0.361821	ENSBTAG00000007047;ENSBTAG00000009070;ENSBTAG00000017549;ENSBTAG00000020079;ENSBTAG00000021872	FZD10;NPFFR2;KITLG;MAP3K4;RASGRP1
GO:0045859	regulation of protein kinase activity	5	458	0.246899	0.53225	ENSBTAG00000007047;ENSBTAG00000009070;ENSBTAG00000017549;ENSBTAG00000020079;ENSBTAG00000021872	FZD10;NPFFR2;KITLG;MAP3K4;RASGRP1
GO:0043549	regulation of kinase activity	5	533	0.353959	0.601882	ENSBTAG00000007047;ENSBTAG00000009070;ENSBTAG00000017549;ENSBTAG00000020079;ENSBTAG00000021872	FZD10;NPFFR2;KITLG;MAP3K4;RASGRP1
GO:0051338	regulation of transferase activity	5	620	0.480159	0.665317	ENSBTAG00000007047;ENSBTAG00000009070;ENSBTAG00000017549;ENSBTAG00000020079;ENSBTAG00000021872	FZD10;NPFFR2;KITLG;MAP3K4;RASGRP1
GO:0043408	regulation of MAPK cascade	7	484	0.0659935	0.375497	ENSBTAG00000007047;ENSBTAG00000009070;ENSBTAG00000011237;ENSBTAG00000013541;ENSBTAG00000017549;ENSBTAG00000020079;ENSBTAG00000021872	FZD10;NPFFR2;PKHD1;LMO3;KITLG;MAP3K4;RASGRP1
GO:0043085	positive regulation of catalytic activity	7	805	0.378959	0.617341	ENSBTAG00000007047;ENSBTAG00000014253;ENSBTAG00000014272;ENSBTAG00000017549;ENSBTAG00000018951;ENSBTAG00000020079;ENSBTAG00000021872	FZD10;TBC1D22B;MMUT;KITLG;TBC1D9;MAP3K4;RASGRP1
GO:0043547	positive regulation of GTPase activity	5	200	0.0160691	0.334809	ENSBTAG00000007047;ENSBTAG00000014253;ENSBTAG00000014272;ENSBTAG00000018951;ENSBTAG00000021872	FZD10;TBC1D22B;MMUT;TBC1D9;RASGRP1
GO:0043087	regulation of GTPase activity	5	275	0.0522641	0.364984	ENSBTAG00000007047;ENSBTAG00000014253;ENSBTAG00000014272;ENSBTAG00000018951;ENSBTAG00000021872	FZD10;TBC1D22B;MMUT;TBC1D9;RASGRP1
GO:0051345	positive regulation of hydrolase activity	5	412	0.186337	0.488576	ENSBTAG00000007047;ENSBTAG00000014253;ENSBTAG00000014272;ENSBTAG00000018951;ENSBTAG00000021872	FZD10;TBC1D22B;MMUT;TBC1D9;RASGRP1
GO:0051336	regulation of hydrolase activity	5	767	0.669242	0.776679	ENSBTAG00000007047;ENSBTAG00000014253;ENSBTAG00000014272;ENSBTAG00000018951;ENSBTAG00000021872	FZD10;TBC1D22B;MMUT;TBC1D9;RASGRP1
GO:0042359	vitamin D metabolic process	1	13	0.0913953	0.400616	ENSBTAG00000013718	GC
GO:0035461	vitamin transmembrane transport	1	22	0.149765	0.457321	ENSBTAG00000013718	GC
GO:0006775	fat-soluble vitamin metabolic process	1	25	0.168383	0.474479	ENSBTAG00000013718	GC
GO:0051180	vitamin transport	1	40	0.255575	0.536776	ENSBTAG00000013718	GC
GO:0060018	astrocyte fate commitment	1	4	0.0290526	0.334809	ENSBTAG00000008148	GCM1
GO:0060800	regulation of cell differentiation involved in embryonic placenta development	1	4	0.0290526	0.334809	ENSBTAG00000008148	GCM1
GO:0060670	branching involved in labyrinthine layer morphogenesis	1	9	0.0641935	0.369698	ENSBTAG00000008148	GCM1
GO:0021781	glial cell fate commitment	1	10	0.0710688	0.376331	ENSBTAG00000008148	GCM1
GO:0060713	labyrinthine layer morphogenesis	1	15	0.104701	0.413044	ENSBTAG00000008148	GCM1
GO:0060143	positive regulation of syncytium formation by plasma membrane fusion	1	17	0.117813	0.433016	ENSBTAG00000008148	GCM1
GO:0060669	embryonic placenta morphogenesis	1	17	0.117813	0.433016	ENSBTAG00000008148	GCM1
GO:0060142	regulation of syncytium formation by plasma membrane fusion	1	19	0.130734	0.44589	ENSBTAG00000008148	GCM1
GO:0060711	labyrinthine layer development	1	36	0.233252	0.519205	ENSBTAG00000008148	GCM1
GO:0000768	syncytium formation by plasma membrane fusion	1	47	0.293099	0.560393	ENSBTAG00000008148	GCM1
GO:0140253	cell-cell fusion	1	47	0.293099	0.560393	ENSBTAG00000008148	GCM1
GO:0006949	syncytium formation	1	48	0.298305	0.560947	ENSBTAG00000008148	GCM1
GO:0048708	astrocyte differentiation	1	58	0.34831	0.598294	ENSBTAG00000008148	GCM1
GO:0010001	glial cell differentiation	1	155	0.682597	0.784145	ENSBTAG00000008148	GCM1
GO:0042063	gliogenesis	1	215	0.797021	0.858303	ENSBTAG00000008148	GCM1
GO:0022008	neurogenesis	4	1166	0.97528	0.979834	ENSBTAG00000008148;ENSBTAG00000011914;ENSBTAG00000013674;ENSBTAG00000016071	GCM1;RASSF10;EDNRA;HHIP
GO:0006507	GPI anchor release	1	1	0.00734301	0.320696	ENSBTAG00000004982	GPLD1
GO:0034014	response to triglyceride	1	1	0.00734301	0.320696	ENSBTAG00000004982	GPLD1
GO:0071401	cellular response to triglyceride	1	1	0.00734301	0.320696	ENSBTAG00000004982	GPLD1
GO:0002430	complement receptor mediated signaling pathway	1	4	0.0290526	0.334809	ENSBTAG00000004982	GPLD1
GO:0071397	cellular response to cholesterol	1	8	0.0572677	0.364984	ENSBTAG00000004982	GPLD1
GO:0036315	cellular response to sterol	1	12	0.0846693	0.400616	ENSBTAG00000004982	GPLD1
GO:0051044	positive regulation of membrane protein ectodomain proteolysis	1	12	0.0846693	0.400616	ENSBTAG00000004982	GPLD1
GO:0051043	regulation of membrane protein ectodomain proteolysis	1	17	0.117813	0.433016	ENSBTAG00000004982	GPLD1
GO:0071467	cellular response to pH	1	20	0.137124	0.450796	ENSBTAG00000004982	GPLD1
GO:0009268	response to pH	1	29	0.192579	0.490671	ENSBTAG00000004982	GPLD1
GO:0006505	GPI anchor metabolic process	1	35	0.227569	0.513438	ENSBTAG00000004982	GPLD1
GO:0006509	membrane protein ectodomain proteolysis	1	37	0.238895	0.523577	ENSBTAG00000004982	GPLD1
GO:0002042	cell migration involved in sprouting angiogenesis	1	44	0.277253	0.547958	ENSBTAG00000004982	GPLD1
GO:0033619	membrane protein proteolysis	1	48	0.298305	0.560947	ENSBTAG00000004982	GPLD1
GO:0097306	cellular response to alcohol	1	53	0.323765	0.580131	ENSBTAG00000004982	GPLD1
GO:0071277	cellular response to calcium ion	1	63	0.37197	0.613128	ENSBTAG00000004982	GPLD1
GO:0006664	glycolipid metabolic process	1	79	0.442103	0.650369	ENSBTAG00000004982	GPLD1
GO:1903509	liposaccharide metabolic process	1	80	0.446219	0.650369	ENSBTAG00000004982	GPLD1
GO:0010595	positive regulation of endothelial cell migration	1	81	0.450304	0.65289	ENSBTAG00000004982	GPLD1
GO:0008286	insulin receptor signaling pathway	1	90	0.485755	0.669256	ENSBTAG00000004982	GPLD1
GO:0043534	blood vessel endothelial cell migration	1	94	0.500774	0.678495	ENSBTAG00000004982	GPLD1
GO:0051592	response to calcium ion	1	95	0.50446	0.681928	ENSBTAG00000004982	GPLD1
GO:0010634	positive regulation of epithelial cell migration	1	113	0.566378	0.715378	ENSBTAG00000004982	GPLD1
GO:0071248	cellular response to metal ion	1	123	0.597395	0.734181	ENSBTAG00000004982	GPLD1
GO:0071241	cellular response to inorganic substance	1	134	0.628975	0.756496	ENSBTAG00000004982	GPLD1
GO:0006643	membrane lipid metabolic process	1	160	0.694186	0.791111	ENSBTAG00000004982	GPLD1
GO:0010038	response to metal ion	1	179	0.734521	0.815484	ENSBTAG00000004982	GPLD1
GO:0071214	cellular response to abiotic stimulus	1	223	0.80879	0.866639	ENSBTAG00000004982	GPLD1
GO:0104004	cellular response to environmental stimulus	1	223	0.80879	0.866639	ENSBTAG00000004982	GPLD1
GO:0010035	response to inorganic substance	1	290	0.884184	0.919131	ENSBTAG00000004982	GPLD1
GO:1900076	regulation of cellular response to insulin stimulus	2	48	0.0484575	0.361821	ENSBTAG00000004982;ENSBTAG00000009552	GPLD1;ATP2B1
GO:0032869	cellular response to insulin stimulus	2	136	0.263726	0.538677	ENSBTAG00000004982;ENSBTAG00000009552	GPLD1;ATP2B1
GO:0032868	response to insulin	2	159	0.326105	0.582093	ENSBTAG00000004982;ENSBTAG00000009552	GPLD1;ATP2B1
GO:0071375	cellular response to peptide hormone stimulus	3	178	0.143066	0.456453	ENSBTAG00000004982;ENSBTAG00000009552;ENSBTAG00000013674	GPLD1;ATP2B1;EDNRA
GO:0043434	response to peptide hormone	3	209	0.198723	0.500402	ENSBTAG00000004982;ENSBTAG00000009552;ENSBTAG00000013674	GPLD1;ATP2B1;EDNRA
GO:1901653	cellular response to peptide	3	210	0.200601	0.504059	ENSBTAG00000004982;ENSBTAG00000009552;ENSBTAG00000013674	GPLD1;ATP2B1;EDNRA
GO:1901652	response to peptide	3	254	0.286443	0.55803	ENSBTAG00000004982;ENSBTAG00000009552;ENSBTAG00000013674	GPLD1;ATP2B1;EDNRA
GO:0071417	cellular response to organonitrogen compound	4	414	0.361842	0.606342	ENSBTAG00000004982;ENSBTAG00000009552;ENSBTAG00000012628;ENSBTAG00000013674	GPLD1;ATP2B1;SLC1A2;EDNRA
GO:1901699	cellular response to nitrogen compound	4	452	0.425045	0.645307	ENSBTAG00000004982;ENSBTAG00000009552;ENSBTAG00000012628;ENSBTAG00000013674	GPLD1;ATP2B1;SLC1A2;EDNRA
GO:0010243	response to organonitrogen compound	4	608	0.657151	0.771146	ENSBTAG00000004982;ENSBTAG00000009552;ENSBTAG00000012628;ENSBTAG00000013674	GPLD1;ATP2B1;SLC1A2;EDNRA
GO:1901698	response to nitrogen compound	4	683	0.743887	0.822019	ENSBTAG00000004982;ENSBTAG00000009552;ENSBTAG00000012628;ENSBTAG00000013674	GPLD1;ATP2B1;SLC1A2;EDNRA
GO:0002253	activation of immune response	3	243	0.264541	0.538677	ENSBTAG00000004982;ENSBTAG00000007450;ENSBTAG00000048304	GPLD1;C2;ENSBTAG00000048304
GO:0030335	positive regulation of cell migration	3	381	0.532839	0.697785	ENSBTAG00000004982;ENSBTAG00000016549;ENSBTAG00000017549	GPLD1;CARMIL1;KITLG
GO:2000147	positive regulation of cell motility	3	397	0.560794	0.713655	ENSBTAG00000004982;ENSBTAG00000016549;ENSBTAG00000017549	GPLD1;CARMIL1;KITLG
GO:0051272	positive regulation of cellular component movement	3	400	0.565924	0.715378	ENSBTAG00000004982;ENSBTAG00000016549;ENSBTAG00000017549	GPLD1;CARMIL1;KITLG
GO:0040017	positive regulation of locomotion	3	408	0.579427	0.724131	ENSBTAG00000004982;ENSBTAG00000016549;ENSBTAG00000017549	GPLD1;CARMIL1;KITLG
GO:0002429	immune response-activating cell surface receptor signaling pathway	2	168	0.350202	0.600673	ENSBTAG00000004982;ENSBTAG00000048304	GPLD1;ENSBTAG00000048304
GO:0002757	immune response-activating signal transduction	2	168	0.350202	0.600673	ENSBTAG00000004982;ENSBTAG00000048304	GPLD1;ENSBTAG00000048304
GO:0002768	immune response-regulating cell surface receptor signaling pathway	2	183	0.389686	0.627155	ENSBTAG00000004982;ENSBTAG00000048304	GPLD1;ENSBTAG00000048304
GO:0046488	phosphatidylinositol metabolic process	2	135	0.261004	0.537786	ENSBTAG00000004982;ENSBTAG00000014111	GPLD1;INPP4B
GO:0006650	glycerophospholipid metabolic process	2	241	0.530577	0.697709	ENSBTAG00000004982;ENSBTAG00000014111	GPLD1;INPP4B
GO:0006644	phospholipid metabolic process	2	314	0.674349	0.777868	ENSBTAG00000004982;ENSBTAG00000014111	GPLD1;INPP4B
GO:0046486	glycerolipid metabolic process	3	321	0.420267	0.643837	ENSBTAG00000004982;ENSBTAG00000005479;ENSBTAG00000014111	GPLD1;LIPC;INPP4B
GO:0070723	response to cholesterol	2	14	0.00459449	0.320696	ENSBTAG00000004982;ENSBTAG00000039916	GPLD1;SMAD2
GO:0036314	response to sterol	2	18	0.00757813	0.320696	ENSBTAG00000004982;ENSBTAG00000039916	GPLD1;SMAD2
GO:0097305	response to alcohol	2	81	0.119369	0.437164	ENSBTAG00000004982;ENSBTAG00000039916	GPLD1;SMAD2
GO:0009749	response to glucose	2	91	0.144099	0.456453	ENSBTAG00000004982;ENSBTAG00000039916	GPLD1;SMAD2
GO:0009746	response to hexose	2	92	0.146629	0.457321	ENSBTAG00000004982;ENSBTAG00000039916	GPLD1;SMAD2
GO:0034284	response to monosaccharide	2	93	0.149168	0.457321	ENSBTAG00000004982;ENSBTAG00000039916	GPLD1;SMAD2
GO:0009743	response to carbohydrate	2	101	0.169781	0.477284	ENSBTAG00000004982;ENSBTAG00000039916	GPLD1;SMAD2
GO:0043065	positive regulation of apoptotic process	2	339	0.71471	0.802904	ENSBTAG00000004982;ENSBTAG00000020426	GPLD1;TFAP2B
GO:0043068	positive regulation of programmed cell death	2	353	0.735444	0.815743	ENSBTAG00000004982;ENSBTAG00000020426	GPLD1;TFAP2B
GO:0010942	positive regulation of cell death	2	380	0.771846	0.843083	ENSBTAG00000004982;ENSBTAG00000020426	GPLD1;TFAP2B
GO:0045732	positive regulation of protein catabolic process	2	161	0.331482	0.585506	ENSBTAG00000004982;ENSBTAG00000009023	GPLD1;TMTC3
GO:0042176	regulation of protein catabolic process	2	286	0.623842	0.754154	ENSBTAG00000004982;ENSBTAG00000009023	GPLD1;TMTC3
GO:0045862	positive regulation of proteolysis	3	257	0.292445	0.560393	ENSBTAG00000004982;ENSBTAG00000009023;ENSBTAG00000009150	GPLD1;TMTC3;SPON1
GO:0030162	regulation of proteolysis	4	558	0.589572	0.729491	ENSBTAG00000004982;ENSBTAG00000009023;ENSBTAG00000009150;ENSBTAG00000044158	GPLD1;TMTC3;SPON1;LDLRAD3
GO:0006805	xenobiotic metabolic process	3	54	0.00729953	0.320696	ENSBTAG00000004288;ENSBTAG00000025485;ENSBTAG00000037949	GSTA4;ENSBTAG00000025485;GSTA5
GO:0071466	cellular response to xenobiotic stimulus	4	90	0.0043531	0.320696	ENSBTAG00000004288;ENSBTAG00000004982;ENSBTAG00000025485;ENSBTAG00000037949	GSTA4;GPLD1;ENSBTAG00000025485;GSTA5
GO:0009410	response to xenobiotic stimulus	6	150	0.000839885	0.320696	ENSBTAG00000004288;ENSBTAG00000004982;ENSBTAG00000011531;ENSBTAG00000012628;ENSBTAG00000025485;ENSBTAG00000037949	GSTA4;GPLD1;SS18;SLC1A2;ENSBTAG00000025485;GSTA5
GO:0006575	cellular modified amino acid metabolic process	6	126	0.000333694	0.228016	ENSBTAG00000004288;ENSBTAG00000009846;ENSBTAG00000012628;ENSBTAG00000015935;ENSBTAG00000025485;ENSBTAG00000037949	GSTA4;MTHFD1L;SLC1A2;IYD;ENSBTAG00000025485;GSTA5
GO:0006518	peptide metabolic process	8	811	0.245759	0.530276	ENSBTAG00000004288;ENSBTAG00000006468;ENSBTAG00000006936;ENSBTAG00000009150;ENSBTAG00000012628;ENSBTAG00000013224;ENSBTAG00000025485;ENSBTAG00000037949	GSTA4;PIWIL1;MRPS18B;SPON1;SLC1A2;RMND1;ENSBTAG00000025485;GSTA5
GO:0043603	cellular amide metabolic process	9	1006	0.319613	0.579712	ENSBTAG00000004288;ENSBTAG00000006468;ENSBTAG00000006936;ENSBTAG00000009150;ENSBTAG00000012628;ENSBTAG00000013224;ENSBTAG00000014272;ENSBTAG00000025485;ENSBTAG00000037949	GSTA4;PIWIL1;MRPS18B;SPON1;SLC1A2;RMND1;MMUT;ENSBTAG00000025485;GSTA5
GO:0006749	glutathione metabolic process	4	38	0.000168575	0.199509	ENSBTAG00000004288;ENSBTAG00000012628;ENSBTAG00000025485;ENSBTAG00000037949	GSTA4;SLC1A2;ENSBTAG00000025485;GSTA5
GO:0051225	spindle assembly	1	93	0.49706	0.677341	ENSBTAG00000002512	HAUS1
GO:0007051	spindle organization	1	150	0.670573	0.776919	ENSBTAG00000002512	HAUS1
GO:0051301	cell division	3	287	0.352709	0.601738	ENSBTAG00000002512;ENSBTAG00000006060;ENSBTAG00000013326	HAUS1;DCDC1;ANAPC10
GO:0040036	regulation of fibroblast growth factor receptor signaling pathway	1	20	0.137124	0.450796	ENSBTAG00000016071	HHIP
GO:0045879	negative regulation of smoothened signaling pathway	1	26	0.174498	0.4775	ENSBTAG00000016071	HHIP
GO:0060441	epithelial tube branching involved in lung morphogenesis	1	26	0.174498	0.4775	ENSBTAG00000016071	HHIP
GO:0060425	lung morphogenesis	1	46	0.287856	0.55803	ENSBTAG00000016071	HHIP
GO:0007405	neuroblast proliferation	1	55	0.333691	0.585506	ENSBTAG00000016071	HHIP
GO:0008589	regulation of smoothened signaling pathway	1	61	0.36261	0.606342	ENSBTAG00000016071	HHIP
GO:0008543	fibroblast growth factor receptor signaling pathway	1	67	0.390283	0.627155	ENSBTAG00000016071	HHIP
GO:0044344	cellular response to fibroblast growth factor stimulus	1	82	0.45436	0.653781	ENSBTAG00000016071	HHIP
GO:0071774	response to fibroblast growth factor	1	82	0.45436	0.653781	ENSBTAG00000016071	HHIP
GO:0007224	smoothened signaling pathway	1	111	0.559897	0.712897	ENSBTAG00000016071	HHIP
GO:0009953	dorsal/ventral pattern formation	2	73	0.100465	0.410002	ENSBTAG00000016071;ENSBTAG00000039916	HHIP;SMAD2
GO:0030324	lung development	2	149	0.299077	0.560947	ENSBTAG00000016071;ENSBTAG00000039916	HHIP;SMAD2
GO:0030323	respiratory tube development	2	151	0.304499	0.567073	ENSBTAG00000016071;ENSBTAG00000039916	HHIP;SMAD2
GO:0060541	respiratory system development	2	167	0.347538	0.598294	ENSBTAG00000016071;ENSBTAG00000039916	HHIP;SMAD2
GO:0097250	mitochondrial respirasome assembly	1	16	0.111281	0.422795	ENSBTAG00000047358	HIGD1C
GO:0015012	heparan sulfate proteoglycan biosynthetic process	1	26	0.174498	0.4775	ENSBTAG00000017391	HS3ST2
GO:0030201	heparan sulfate proteoglycan metabolic process	1	32	0.210266	0.509416	ENSBTAG00000017391	HS3ST2
GO:0030166	proteoglycan biosynthetic process	1	53	0.323765	0.580131	ENSBTAG00000017391	HS3ST2
GO:0006024	glycosaminoglycan biosynthetic process	2	49	0.0502826	0.361821	ENSBTAG00000017391;ENSBTAG00000034522	HS3ST2;SLC10A7
GO:0006023	aminoglycan biosynthetic process	2	55	0.0617325	0.369698	ENSBTAG00000017391;ENSBTAG00000034522	HS3ST2;SLC10A7
GO:0070086	ubiquitin-dependent endocytosis	1	4	0.0290526	0.334809	ENSBTAG00000005215	IL10RA
GO:0046427	positive regulation of receptor signaling pathway via JAK-STAT	1	26	0.174498	0.4775	ENSBTAG00000005215	IL10RA
GO:1904894	positive regulation of receptor signaling pathway via STAT	1	28	0.186596	0.488576	ENSBTAG00000005215	IL10RA
GO:0010507	negative regulation of autophagy	1	56	0.3386	0.58983	ENSBTAG00000005215	IL10RA
GO:0046425	regulation of receptor signaling pathway via JAK-STAT	1	73	0.416763	0.640987	ENSBTAG00000005215	IL10RA
GO:1904892	regulation of receptor signaling pathway via STAT	1	77	0.43378	0.647797	ENSBTAG00000005215	IL10RA
GO:0031330	negative regulation of cellular catabolic process	1	179	0.734521	0.815484	ENSBTAG00000005215	IL10RA
GO:0009895	negative regulation of catabolic process	1	233	0.822554	0.875049	ENSBTAG00000005215	IL10RA
GO:0006897	endocytosis	3	409	0.581096	0.725268	ENSBTAG00000005215;ENSBTAG00000016549;ENSBTAG00000044158	IL10RA;CARMIL1;LDLRAD3
GO:0033365	protein localization to organelle	5	688	0.573018	0.718777	ENSBTAG00000005215;ENSBTAG00000006398;ENSBTAG00000007159;ENSBTAG00000009112;ENSBTAG00000012738	IL10RA;ENSBTAG00000006398;ESR1;TRAM2;ZNF827
GO:0072594	establishment of protein localization to organelle	4	306	0.188009	0.490671	ENSBTAG00000005215;ENSBTAG00000006398;ENSBTAG00000009112;ENSBTAG00000012738	IL10RA;ENSBTAG00000006398;TRAM2;ZNF827
GO:0007259	receptor signaling pathway via JAK-STAT	2	125	0.233828	0.519205	ENSBTAG00000005215;ENSBTAG00000018200	IL10RA;IL15
GO:0097696	receptor signaling pathway via STAT	2	130	0.247402	0.532364	ENSBTAG00000005215;ENSBTAG00000018200	IL10RA;IL15
GO:0098657	import into cell	2	190	0.407757	0.635455	ENSBTAG00000005215;ENSBTAG00000012628	IL10RA;SLC1A2
GO:1904098	regulation of protein O-linked glycosylation	1	1	0.00734301	0.320696	ENSBTAG00000018200	IL15
GO:1904100	positive regulation of protein O-linked glycosylation	1	1	0.00734301	0.320696	ENSBTAG00000018200	IL15
GO:0045062	extrathymic T cell selection	1	2	0.0146325	0.320696	ENSBTAG00000018200	IL15
GO:0060050	positive regulation of protein glycosylation	1	2	0.0146325	0.320696	ENSBTAG00000018200	IL15
GO:0033078	extrathymic T cell differentiation	1	4	0.0290526	0.334809	ENSBTAG00000018200	IL15
GO:0060049	regulation of protein glycosylation	1	4	0.0290526	0.334809	ENSBTAG00000018200	IL15
GO:0032819	positive regulation of natural killer cell proliferation	1	6	0.0432634	0.3507	ENSBTAG00000018200	IL15
GO:0035723	interleukin-15-mediated signaling pathway	1	6	0.0432634	0.3507	ENSBTAG00000018200	IL15
GO:0071350	cellular response to interleukin-15	1	6	0.0432634	0.3507	ENSBTAG00000018200	IL15
GO:0032817	regulation of natural killer cell proliferation	1	7	0.0502912	0.361821	ENSBTAG00000018200	IL15
GO:0070672	response to interleukin-15	1	7	0.0502912	0.361821	ENSBTAG00000018200	IL15
GO:0001866	NK T cell proliferation	1	8	0.0572677	0.364984	ENSBTAG00000018200	IL15
GO:0051132	NK T cell activation	1	8	0.0572677	0.364984	ENSBTAG00000018200	IL15
GO:0001787	natural killer cell proliferation	1	10	0.0710688	0.376331	ENSBTAG00000018200	IL15
GO:0010560	positive regulation of glycoprotein biosynthetic process	1	12	0.0846693	0.400616	ENSBTAG00000018200	IL15
GO:1903020	positive regulation of glycoprotein metabolic process	1	14	0.0980723	0.405515	ENSBTAG00000018200	IL15
GO:0048535	lymph node development	1	17	0.117813	0.433016	ENSBTAG00000018200	IL15
GO:0032740	positive regulation of interleukin-17 production	1	19	0.130734	0.44589	ENSBTAG00000018200	IL15
GO:0010559	regulation of glycoprotein biosynthetic process	1	22	0.149765	0.457321	ENSBTAG00000018200	IL15
GO:1903018	regulation of glycoprotein metabolic process	1	26	0.174498	0.4775	ENSBTAG00000018200	IL15
GO:0042119	neutrophil activation	1	27	0.180569	0.480233	ENSBTAG00000018200	IL15
GO:0032620	interleukin-17 production	1	29	0.192579	0.490671	ENSBTAG00000018200	IL15
GO:0032660	regulation of interleukin-17 production	1	29	0.192579	0.490671	ENSBTAG00000018200	IL15
GO:0036230	granulocyte activation	1	31	0.204413	0.506393	ENSBTAG00000018200	IL15
GO:0030225	macrophage differentiation	1	32	0.210266	0.509416	ENSBTAG00000018200	IL15
GO:0046633	alpha-beta T cell proliferation	1	32	0.210266	0.509416	ENSBTAG00000018200	IL15
GO:0045058	T cell selection	1	41	0.261054	0.537786	ENSBTAG00000018200	IL15
GO:0007260	tyrosine phosphorylation of STAT protein	1	60	0.357878	0.602059	ENSBTAG00000018200	IL15
GO:0046631	alpha-beta T cell activation	1	120	0.588328	0.728333	ENSBTAG00000018200	IL15
GO:0032825	positive regulation of natural killer cell differentiation	2	7	0.00109655	0.320696	ENSBTAG00000018200;ENSBTAG00000021872	IL15;RASGRP1
GO:0032823	regulation of natural killer cell differentiation	2	12	0.00336441	0.320696	ENSBTAG00000018200;ENSBTAG00000021872	IL15;RASGRP1
GO:0032816	positive regulation of natural killer cell activation	2	15	0.00527596	0.320696	ENSBTAG00000018200;ENSBTAG00000021872	IL15;RASGRP1
GO:0001779	natural killer cell differentiation	2	21	0.0102532	0.320696	ENSBTAG00000018200;ENSBTAG00000021872	IL15;RASGRP1
GO:0032814	regulation of natural killer cell activation	2	25	0.0143704	0.320696	ENSBTAG00000018200;ENSBTAG00000021872	IL15;RASGRP1
GO:0030101	natural killer cell activation	2	68	0.0891279	0.400616	ENSBTAG00000018200;ENSBTAG00000021872	IL15;RASGRP1
GO:0045621	positive regulation of lymphocyte differentiation	2	79	0.114562	0.431798	ENSBTAG00000018200;ENSBTAG00000021872	IL15;RASGRP1
GO:0045580	regulation of T cell differentiation	2	113	0.201497	0.504168	ENSBTAG00000018200;ENSBTAG00000021872	IL15;RASGRP1
GO:0045619	regulation of lymphocyte differentiation	2	136	0.263726	0.538677	ENSBTAG00000018200;ENSBTAG00000021872	IL15;RASGRP1
GO:0002274	myeloid leukocyte activation	2	144	0.285496	0.557566	ENSBTAG00000018200;ENSBTAG00000021872	IL15;RASGRP1
GO:0030217	T cell differentiation	2	209	0.45545	0.654157	ENSBTAG00000018200;ENSBTAG00000021872	IL15;RASGRP1
GO:0030098	lymphocyte differentiation	2	307	0.662257	0.774104	ENSBTAG00000018200;ENSBTAG00000021872	IL15;RASGRP1
GO:1903131	mononuclear cell differentiation	2	345	0.723756	0.8077	ENSBTAG00000018200;ENSBTAG00000021872	IL15;RASGRP1
GO:0050691	regulation of defense response to virus by host	2	30	0.020347	0.334809	ENSBTAG00000018200;ENSBTAG00000037389	IL15;TRIM44
GO:0050688	regulation of defense response to virus	2	55	0.0617325	0.369698	ENSBTAG00000018200;ENSBTAG00000037389	IL15;TRIM44
GO:0051607	defense response to virus	2	208	0.452993	0.653781	ENSBTAG00000018200;ENSBTAG00000037389	IL15;TRIM44
GO:0140546	defense response to symbiont	2	208	0.452993	0.653781	ENSBTAG00000018200;ENSBTAG00000037389	IL15;TRIM44
GO:0009615	response to virus	2	269	0.590364	0.730089	ENSBTAG00000018200;ENSBTAG00000037389	IL15;TRIM44
GO:0036092	phosphatidylinositol-3-phosphate biosynthetic process	1	11	0.0778939	0.388915	ENSBTAG00000014111	INPP4B
GO:0046854	phosphatidylinositol phosphate biosynthetic process	1	51	0.313693	0.572484	ENSBTAG00000014111	INPP4B
GO:0006661	phosphatidylinositol biosynthetic process	1	98	0.515357	0.685694	ENSBTAG00000014111	INPP4B
GO:0046474	glycerophospholipid biosynthetic process	1	146	0.660629	0.772583	ENSBTAG00000014111	INPP4B
GO:0008654	phospholipid biosynthetic process	1	172	0.720315	0.805759	ENSBTAG00000014111	INPP4B
GO:0045017	glycerolipid biosynthetic process	1	179	0.734521	0.815484	ENSBTAG00000014111	INPP4B
GO:0090407	organophosphate biosynthetic process	2	408	0.804948	0.863695	ENSBTAG00000014111;ENSBTAG00000014272	INPP4B;MMUT
GO:0006570	tyrosine metabolic process	1	11	0.0778939	0.388915	ENSBTAG00000015935	IYD
GO:0042403	thyroid hormone metabolic process	1	21	0.143468	0.456453	ENSBTAG00000015935	IYD
GO:0009072	aromatic amino acid family metabolic process	1	23	0.156016	0.463933	ENSBTAG00000015935	IYD
GO:0033024	mast cell apoptotic process	1	1	0.00734301	0.320696	ENSBTAG00000017549	KITLG
GO:0033025	regulation of mast cell apoptotic process	1	1	0.00734301	0.320696	ENSBTAG00000017549	KITLG
GO:0033026	negative regulation of mast cell apoptotic process	1	1	0.00734301	0.320696	ENSBTAG00000017549	KITLG
GO:0033023	mast cell homeostasis	1	2	0.0146325	0.320696	ENSBTAG00000017549	KITLG
GO:0097324	melanocyte migration	1	2	0.0146325	0.320696	ENSBTAG00000017549	KITLG
GO:0045636	positive regulation of melanocyte differentiation	1	3	0.0218689	0.334809	ENSBTAG00000017549	KITLG
GO:0045634	regulation of melanocyte differentiation	1	4	0.0290526	0.334809	ENSBTAG00000017549	KITLG
GO:0070668	positive regulation of mast cell proliferation	1	4	0.0290526	0.334809	ENSBTAG00000017549	KITLG
GO:1901534	positive regulation of hematopoietic progenitor cell differentiation	1	4	0.0290526	0.334809	ENSBTAG00000017549	KITLG
GO:0048087	positive regulation of developmental pigmentation	1	5	0.036184	0.348894	ENSBTAG00000017549	KITLG
GO:0050942	positive regulation of pigment cell differentiation	1	5	0.036184	0.348894	ENSBTAG00000017549	KITLG
GO:0050932	regulation of pigment cell differentiation	1	6	0.0432634	0.3507	ENSBTAG00000017549	KITLG
GO:0070662	mast cell proliferation	1	6	0.0432634	0.3507	ENSBTAG00000017549	KITLG
GO:0070666	regulation of mast cell proliferation	1	6	0.0432634	0.3507	ENSBTAG00000017549	KITLG
GO:1902035	positive regulation of hematopoietic stem cell proliferation	1	8	0.0572677	0.364984	ENSBTAG00000017549	KITLG
GO:0048070	regulation of developmental pigmentation	1	9	0.0641935	0.369698	ENSBTAG00000017549	KITLG
GO:0120305	regulation of pigmentation	1	9	0.0641935	0.369698	ENSBTAG00000017549	KITLG
GO:0097531	mast cell migration	1	10	0.0710688	0.376331	ENSBTAG00000017549	KITLG
GO:1902033	regulation of hematopoietic stem cell proliferation	1	10	0.0710688	0.376331	ENSBTAG00000017549	KITLG
GO:0035234	ectopic germ cell programmed cell death	1	11	0.0778939	0.388915	ENSBTAG00000017549	KITLG
GO:0033033	negative regulation of myeloid cell apoptotic process	1	13	0.0913953	0.400616	ENSBTAG00000017549	KITLG
GO:0010623	programmed cell death involved in cell development	1	17	0.117813	0.433016	ENSBTAG00000017549	KITLG
GO:0030318	melanocyte differentiation	1	18	0.124297	0.437164	ENSBTAG00000017549	KITLG
GO:0035162	embryonic hemopoiesis	1	19	0.130734	0.44589	ENSBTAG00000017549	KITLG
GO:0033032	regulation of myeloid cell apoptotic process	1	20	0.137124	0.450796	ENSBTAG00000017549	KITLG
GO:0033028	myeloid cell apoptotic process	1	23	0.156016	0.463933	ENSBTAG00000017549	KITLG
GO:0071425	hematopoietic stem cell proliferation	1	24	0.162222	0.470564	ENSBTAG00000017549	KITLG
GO:0050931	pigment cell differentiation	1	27	0.180569	0.480233	ENSBTAG00000017549	KITLG
GO:1901532	regulation of hematopoietic progenitor cell differentiation	1	29	0.192579	0.490671	ENSBTAG00000017549	KITLG
GO:0048066	developmental pigmentation	1	35	0.227569	0.513438	ENSBTAG00000017549	KITLG
GO:2000107	negative regulation of leukocyte apoptotic process	1	42	0.266494	0.538677	ENSBTAG00000017549	KITLG
GO:2000648	positive regulation of stem cell proliferation	1	42	0.266494	0.538677	ENSBTAG00000017549	KITLG
GO:0002763	positive regulation of myeloid leukocyte differentiation	1	46	0.287856	0.55803	ENSBTAG00000017549	KITLG
GO:0038034	signal transduction in absence of ligand	1	50	0.308601	0.568893	ENSBTAG00000017549	KITLG
GO:0097192	extrinsic apoptotic signaling pathway in absence of ligand	1	50	0.308601	0.568893	ENSBTAG00000017549	KITLG
GO:2000106	regulation of leukocyte apoptotic process	1	63	0.37197	0.613128	ENSBTAG00000017549	KITLG
GO:0072091	regulation of stem cell proliferation	1	69	0.39924	0.628325	ENSBTAG00000017549	KITLG
GO:0043473	pigmentation	1	73	0.416763	0.640987	ENSBTAG00000017549	KITLG
GO:0001776	leukocyte homeostasis	1	75	0.425334	0.645307	ENSBTAG00000017549	KITLG
GO:0071887	leukocyte apoptotic process	1	77	0.43378	0.647797	ENSBTAG00000017549	KITLG
GO:0045639	positive regulation of myeloid cell differentiation	1	79	0.442103	0.650369	ENSBTAG00000017549	KITLG
GO:0002761	regulation of myeloid leukocyte differentiation	1	89	0.481931	0.665317	ENSBTAG00000017549	KITLG
GO:0072089	stem cell proliferation	1	96	0.508119	0.682974	ENSBTAG00000017549	KITLG
GO:0002687	positive regulation of leukocyte migration	1	104	0.536444	0.699208	ENSBTAG00000017549	KITLG
GO:0002244	hematopoietic progenitor cell differentiation	1	110	0.55662	0.711788	ENSBTAG00000017549	KITLG
GO:0002262	myeloid cell homeostasis	1	130	0.617786	0.749129	ENSBTAG00000017549	KITLG
GO:0045637	regulation of myeloid cell differentiation	1	151	0.673013	0.777084	ENSBTAG00000017549	KITLG
GO:0097529	myeloid leukocyte migration	1	158	0.689602	0.789307	ENSBTAG00000017549	KITLG
GO:0002685	regulation of leukocyte migration	1	165	0.705355	0.797007	ENSBTAG00000017549	KITLG
GO:0050900	leukocyte migration	1	277	0.872331	0.91081	ENSBTAG00000017549	KITLG
GO:0002683	negative regulation of immune system process	1	315	0.903994	0.931542	ENSBTAG00000017549	KITLG
GO:0007265	Ras protein signal transduction	3	262	0.302468	0.565515	ENSBTAG00000017549;ENSBTAG00000021343;ENSBTAG00000021872	KITLG;ARHGEF12;RASGRP1
GO:0007264	small GTPase mediated signal transduction	3	345	0.466586	0.658482	ENSBTAG00000017549;ENSBTAG00000021343;ENSBTAG00000021872	KITLG;ARHGEF12;RASGRP1
GO:0042102	positive regulation of T cell proliferation	2	66	0.0847078	0.400616	ENSBTAG00000017549;ENSBTAG00000018200	KITLG;IL15
GO:0050671	positive regulation of lymphocyte proliferation	2	91	0.144099	0.456453	ENSBTAG00000017549;ENSBTAG00000018200	KITLG;IL15
GO:0032946	positive regulation of mononuclear cell proliferation	2	92	0.146629	0.457321	ENSBTAG00000017549;ENSBTAG00000018200	KITLG;IL15
GO:0070665	positive regulation of leukocyte proliferation	2	104	0.177632	0.480233	ENSBTAG00000017549;ENSBTAG00000018200	KITLG;IL15
GO:0042129	regulation of T cell proliferation	2	124	0.231119	0.518192	ENSBTAG00000017549;ENSBTAG00000018200	KITLG;IL15
GO:0050731	positive regulation of peptidyl-tyrosine phosphorylation	2	134	0.258282	0.537786	ENSBTAG00000017549;ENSBTAG00000018200	KITLG;IL15
GO:0050670	regulation of lymphocyte proliferation	2	161	0.331482	0.585506	ENSBTAG00000017549;ENSBTAG00000018200	KITLG;IL15
GO:0032944	regulation of mononuclear cell proliferation	2	163	0.336847	0.589731	ENSBTAG00000017549;ENSBTAG00000018200	KITLG;IL15
GO:0002573	myeloid leukocyte differentiation	2	166	0.34487	0.595845	ENSBTAG00000017549;ENSBTAG00000018200	KITLG;IL15
GO:0070663	regulation of leukocyte proliferation	2	178	0.376632	0.61482	ENSBTAG00000017549;ENSBTAG00000018200	KITLG;IL15
GO:0050730	regulation of peptidyl-tyrosine phosphorylation	2	184	0.392282	0.628325	ENSBTAG00000017549;ENSBTAG00000018200	KITLG;IL15
GO:0018108	peptidyl-tyrosine phosphorylation	2	268	0.588328	0.728333	ENSBTAG00000017549;ENSBTAG00000018200	KITLG;IL15
GO:0018212	peptidyl-tyrosine modification	2	270	0.592392	0.731452	ENSBTAG00000017549;ENSBTAG00000018200	KITLG;IL15
GO:0030099	myeloid cell differentiation	2	303	0.655188	0.770828	ENSBTAG00000017549;ENSBTAG00000018200	KITLG;IL15
GO:1902107	positive regulation of leukocyte differentiation	3	122	0.060854	0.369698	ENSBTAG00000017549;ENSBTAG00000018200;ENSBTAG00000021872	KITLG;IL15;RASGRP1
GO:1903708	positive regulation of hemopoiesis	3	122	0.060854	0.369698	ENSBTAG00000017549;ENSBTAG00000018200;ENSBTAG00000021872	KITLG;IL15;RASGRP1
GO:0042098	T cell proliferation	3	146	0.0925575	0.404213	ENSBTAG00000017549;ENSBTAG00000018200;ENSBTAG00000021872	KITLG;IL15;RASGRP1
GO:0050870	positive regulation of T cell activation	3	158	0.110506	0.422795	ENSBTAG00000017549;ENSBTAG00000018200;ENSBTAG00000021872	KITLG;IL15;RASGRP1
GO:1903039	positive regulation of leukocyte cell-cell adhesion	3	175	0.137992	0.453018	ENSBTAG00000017549;ENSBTAG00000018200;ENSBTAG00000021872	KITLG;IL15;RASGRP1
GO:0022409	positive regulation of cell-cell adhesion	3	204	0.1894	0.490671	ENSBTAG00000017549;ENSBTAG00000018200;ENSBTAG00000021872	KITLG;IL15;RASGRP1
GO:1902105	regulation of leukocyte differentiation	3	216	0.211957	0.512061	ENSBTAG00000017549;ENSBTAG00000018200;ENSBTAG00000021872	KITLG;IL15;RASGRP1
GO:0046651	lymphocyte proliferation	3	221	0.221527	0.513438	ENSBTAG00000017549;ENSBTAG00000018200;ENSBTAG00000021872	KITLG;IL15;RASGRP1
GO:0032943	mononuclear cell proliferation	3	223	0.225379	0.513438	ENSBTAG00000017549;ENSBTAG00000018200;ENSBTAG00000021872	KITLG;IL15;RASGRP1
GO:0051251	positive regulation of lymphocyte activation	3	229	0.237015	0.523577	ENSBTAG00000017549;ENSBTAG00000018200;ENSBTAG00000021872	KITLG;IL15;RASGRP1
GO:0070661	leukocyte proliferation	3	246	0.270495	0.544016	ENSBTAG00000017549;ENSBTAG00000018200;ENSBTAG00000021872	KITLG;IL15;RASGRP1
GO:1903037	regulation of leukocyte cell-cell adhesion	3	248	0.274473	0.547148	ENSBTAG00000017549;ENSBTAG00000018200;ENSBTAG00000021872	KITLG;IL15;RASGRP1
GO:0050863	regulation of T cell activation	3	251	0.280452	0.551811	ENSBTAG00000017549;ENSBTAG00000018200;ENSBTAG00000021872	KITLG;IL15;RASGRP1
GO:0002696	positive regulation of leukocyte activation	3	260	0.298456	0.560947	ENSBTAG00000017549;ENSBTAG00000018200;ENSBTAG00000021872	KITLG;IL15;RASGRP1
GO:0050867	positive regulation of cell activation	3	269	0.316529	0.576769	ENSBTAG00000017549;ENSBTAG00000018200;ENSBTAG00000021872	KITLG;IL15;RASGRP1
GO:1903706	regulation of hemopoiesis	3	274	0.326582	0.582093	ENSBTAG00000017549;ENSBTAG00000018200;ENSBTAG00000021872	KITLG;IL15;RASGRP1
GO:0007159	leukocyte cell-cell adhesion	3	280	0.338647	0.58983	ENSBTAG00000017549;ENSBTAG00000018200;ENSBTAG00000021872	KITLG;IL15;RASGRP1
GO:0022407	regulation of cell-cell adhesion	3	324	0.426134	0.645748	ENSBTAG00000017549;ENSBTAG00000018200;ENSBTAG00000021872	KITLG;IL15;RASGRP1
GO:0051249	regulation of lymphocyte activation	3	360	0.494716	0.676483	ENSBTAG00000017549;ENSBTAG00000018200;ENSBTAG00000021872	KITLG;IL15;RASGRP1
GO:0042110	T cell activation	3	393	0.553898	0.710226	ENSBTAG00000017549;ENSBTAG00000018200;ENSBTAG00000021872	KITLG;IL15;RASGRP1
GO:0002694	regulation of leukocyte activation	3	420	0.599187	0.735242	ENSBTAG00000017549;ENSBTAG00000018200;ENSBTAG00000021872	KITLG;IL15;RASGRP1
GO:0002521	leukocyte differentiation	3	441	0.632299	0.758567	ENSBTAG00000017549;ENSBTAG00000018200;ENSBTAG00000021872	KITLG;IL15;RASGRP1
GO:0050865	regulation of cell activation	3	451	0.647396	0.766528	ENSBTAG00000017549;ENSBTAG00000018200;ENSBTAG00000021872	KITLG;IL15;RASGRP1
GO:0046649	lymphocyte activation	3	575	0.798714	0.859196	ENSBTAG00000017549;ENSBTAG00000018200;ENSBTAG00000021872	KITLG;IL15;RASGRP1
GO:0098609	cell-cell adhesion	3	631	0.847032	0.893461	ENSBTAG00000017549;ENSBTAG00000018200;ENSBTAG00000021872	KITLG;IL15;RASGRP1
GO:0030097	hemopoiesis	3	673	0.87641	0.914263	ENSBTAG00000017549;ENSBTAG00000018200;ENSBTAG00000021872	KITLG;IL15;RASGRP1
GO:0045321	leukocyte activation	3	679	0.880177	0.916173	ENSBTAG00000017549;ENSBTAG00000018200;ENSBTAG00000021872	KITLG;IL15;RASGRP1
GO:0048534	hematopoietic or lymphoid organ development	3	708	0.89699	0.926746	ENSBTAG00000017549;ENSBTAG00000018200;ENSBTAG00000021872	KITLG;IL15;RASGRP1
GO:0002520	immune system development	3	757	0.920673	0.940541	ENSBTAG00000017549;ENSBTAG00000018200;ENSBTAG00000021872	KITLG;IL15;RASGRP1
GO:0001775	cell activation	3	761	0.922371	0.941159	ENSBTAG00000017549;ENSBTAG00000018200;ENSBTAG00000021872	KITLG;IL15;RASGRP1
GO:0046579	positive regulation of Ras protein signal transduction	2	43	0.0397161	0.3507	ENSBTAG00000017549;ENSBTAG00000021872	KITLG;RASGRP1
GO:0051057	positive regulation of small GTPase mediated signal transduction	2	47	0.0466574	0.361821	ENSBTAG00000017549;ENSBTAG00000021872	KITLG;RASGRP1
GO:0046578	regulation of Ras protein signal transduction	2	153	0.309914	0.570869	ENSBTAG00000017549;ENSBTAG00000021872	KITLG;RASGRP1
GO:0051056	regulation of small GTPase mediated signal transduction	2	182	0.387085	0.623709	ENSBTAG00000017549;ENSBTAG00000021872	KITLG;RASGRP1
GO:0043000	Golgi to plasma membrane CFTR protein transport	1	2	0.0146325	0.320696	ENSBTAG00000001517	KRT18
GO:0043001	Golgi to plasma membrane protein transport	1	27	0.180569	0.480233	ENSBTAG00000001517	KRT18
GO:0006893	Golgi to plasma membrane transport	1	38	0.244496	0.52892	ENSBTAG00000001517	KRT18
GO:0061951	establishment of protein localization to plasma membrane	1	44	0.277253	0.547958	ENSBTAG00000001517	KRT18
GO:0006892	post-Golgi vesicle-mediated transport	1	64	0.376599	0.61482	ENSBTAG00000001517	KRT18
GO:0098876	vesicle-mediated transport to the plasma membrane	1	113	0.566378	0.715378	ENSBTAG00000001517	KRT18
GO:0072659	protein localization to plasma membrane	1	213	0.793968	0.856184	ENSBTAG00000001517	KRT18
GO:0042981	regulation of apoptotic process	8	1011	0.466267	0.658482	ENSBTAG00000001517;ENSBTAG00000004982;ENSBTAG00000005206;ENSBTAG00000007159;ENSBTAG00000008733;ENSBTAG00000011237;ENSBTAG00000017549;ENSBTAG00000020426	KRT18;GPLD1;TMEM14A;ESR1;MAGED1;PKHD1;KITLG;TFAP2B
GO:0043067	regulation of programmed cell death	8	1041	0.499621	0.678495	ENSBTAG00000001517;ENSBTAG00000004982;ENSBTAG00000005206;ENSBTAG00000007159;ENSBTAG00000008733;ENSBTAG00000011237;ENSBTAG00000017549;ENSBTAG00000020426	KRT18;GPLD1;TMEM14A;ESR1;MAGED1;PKHD1;KITLG;TFAP2B
GO:0010941	regulation of cell death	8	1121	0.585164	0.727199	ENSBTAG00000001517;ENSBTAG00000004982;ENSBTAG00000005206;ENSBTAG00000007159;ENSBTAG00000008733;ENSBTAG00000011237;ENSBTAG00000017549;ENSBTAG00000020426	KRT18;GPLD1;TMEM14A;ESR1;MAGED1;PKHD1;KITLG;TFAP2B
GO:0048523	negative regulation of cellular process	26	3693	0.630882	0.758019	ENSBTAG00000001517;ENSBTAG00000002606;ENSBTAG00000002835;ENSBTAG00000003399;ENSBTAG00000003505;ENSBTAG00000004982;ENSBTAG00000005206;ENSBTAG00000005215;ENSBTAG00000006468;ENSBTAG00000007159;ENSBTAG00000008733;ENSBTAG00000009150;ENSBTAG00000011237;ENSBTAG00000012738;ENSBTAG00000013541;ENSBTAG00000014490;ENSBTAG00000016071;ENSBTAG00000016549;ENSBTAG00000017549;ENSBTAG00000020330;ENSBTAG00000020426;…	KRT18;LGR4;SMAD1;SMARCA5;DCN;GPLD1;TMEM14A;IL10RA;PIWIL1;ESR1;MAGED1;SPON1;PKHD1;ZNF827;LMO3;DDX39B;HHIP;CARMIL1;KITLG;BTG1;TFAP2B;PRR5L;SCAF8;TRIM44;SMAD2;KCTD1
GO:0048519	negative regulation of biological process	30	4054	0.515309	0.685694	ENSBTAG00000001517;ENSBTAG00000002606;ENSBTAG00000002835;ENSBTAG00000003399;ENSBTAG00000003505;ENSBTAG00000004982;ENSBTAG00000005206;ENSBTAG00000005215;ENSBTAG00000006468;ENSBTAG00000007047;ENSBTAG00000007159;ENSBTAG00000008733;ENSBTAG00000009150;ENSBTAG00000009552;ENSBTAG00000011237;ENSBTAG00000012738;ENSBTAG00000013541;ENSBTAG00000014490;ENSBTAG00000016071;ENSBTAG00000016549;ENSBTAG00000017549;…	KRT18;LGR4;SMAD1;SMARCA5;DCN;GPLD1;TMEM14A;IL10RA;PIWIL1;FZD10;ESR1;MAGED1;SPON1;ATP2B1;PKHD1;ZNF827;LMO3;DDX39B;HHIP;CARMIL1;KITLG;IL15;BTG1;TFAP2B;PRR5L;SCAF8;TRIM26;TRIM44;SMAD2;KCTD1
GO:0048193	Golgi vesicle transport	2	211	0.460345	0.655758	ENSBTAG00000001517;ENSBTAG00000034522	KRT18;SLC10A7
GO:0043066	negative regulation of apoptotic process	5	634	0.499876	0.678495	ENSBTAG00000001517;ENSBTAG00000005206;ENSBTAG00000011237;ENSBTAG00000017549;ENSBTAG00000020426	KRT18;TMEM14A;PKHD1;KITLG;TFAP2B
GO:0043069	negative regulation of programmed cell death	5	652	0.524812	0.694759	ENSBTAG00000001517;ENSBTAG00000005206;ENSBTAG00000011237;ENSBTAG00000017549;ENSBTAG00000020426	KRT18;TMEM14A;PKHD1;KITLG;TFAP2B
GO:0060548	negative regulation of cell death	5	710	0.601223	0.735829	ENSBTAG00000001517;ENSBTAG00000005206;ENSBTAG00000011237;ENSBTAG00000017549;ENSBTAG00000020426	KRT18;TMEM14A;PKHD1;KITLG;TFAP2B
GO:0090150	establishment of protein localization to membrane	2	170	0.35552	0.602059	ENSBTAG00000001517;ENSBTAG00000009112	KRT18;TRAM2
GO:0031424	keratinization	1	34	0.221843	0.513438	ENSBTAG00000000836	KRT8
GO:0045109	intermediate filament organization	1	50	0.308601	0.568893	ENSBTAG00000000836	KRT8
GO:0030216	keratinocyte differentiation	1	106	0.543268	0.704611	ENSBTAG00000000836	KRT8
GO:0009913	epidermal cell differentiation	1	161	0.696453	0.791789	ENSBTAG00000000836	KRT8
GO:0044419	biological process involved in interspecies interaction between organisms	8	1120	0.584134	0.727067	ENSBTAG00000000836;ENSBTAG00000000977;ENSBTAG00000007450;ENSBTAG00000014490;ENSBTAG00000018200;ENSBTAG00000021872;ENSBTAG00000035744;ENSBTAG00000037389	KRT8;CADM1;C2;DDX39B;IL15;RASGRP1;TRIM26;TRIM44
GO:0051707	response to other organism	7	996	0.602209	0.736656	ENSBTAG00000000836;ENSBTAG00000000977;ENSBTAG00000007450;ENSBTAG00000018200;ENSBTAG00000021872;ENSBTAG00000035744;ENSBTAG00000037389	KRT8;CADM1;C2;IL15;RASGRP1;TRIM26;TRIM44
GO:0043207	response to external biotic stimulus	7	997	0.603282	0.736883	ENSBTAG00000000836;ENSBTAG00000000977;ENSBTAG00000007450;ENSBTAG00000018200;ENSBTAG00000021872;ENSBTAG00000035744;ENSBTAG00000037389	KRT8;CADM1;C2;IL15;RASGRP1;TRIM26;TRIM44
GO:0009607	response to biotic stimulus	7	1028	0.63578	0.76043	ENSBTAG00000000836;ENSBTAG00000000977;ENSBTAG00000007450;ENSBTAG00000018200;ENSBTAG00000021872;ENSBTAG00000035744;ENSBTAG00000037389	KRT8;CADM1;C2;IL15;RASGRP1;TRIM26;TRIM44
GO:0050896	response to stimulus	57	7633	0.466379	0.658482	ENSBTAG00000000836;ENSBTAG00000000977;ENSBTAG00000001517;ENSBTAG00000002531;ENSBTAG00000002606;ENSBTAG00000002835;ENSBTAG00000003399;ENSBTAG00000003505;ENSBTAG00000003581;ENSBTAG00000004098;ENSBTAG00000004288;ENSBTAG00000004647;ENSBTAG00000004982;ENSBTAG00000005206;ENSBTAG00000005215;ENSBTAG00000006060;ENSBTAG00000007047;ENSBTAG00000007159;ENSBTAG00000007450;ENSBTAG00000009023;ENSBTAG00000009070;…	KRT8;CADM1;KRT18;ARHGAP10;LGR4;SMAD1;SMARCA5;DCN;SETD7;ARMT1;GSTA4;UCP1;GPLD1;TMEM14A;IL10RA;DCDC1;FZD10;ESR1;C2;TMTC3;NPFFR2;ATP2B1;ENSBTAG00000009656;PKHD1;MAML3;SS18;RASSF10;SLC1A2;LMO3;NOX3;EDNRA;ADGRD1;DDX39B;AKAP12;CALCOCO1;HHIP;KITLG;IL15;MAP3K4;TFAP2B;PRR5L;ARHGEF12;RASGRP1;PRP4;ENSBTAG00000025485;TMEM117;TRIM26;TRIM44;GSTA5;SMAD2;OR52A5EP;ENSBTAG00000048304;ENSBTAG00000051946;OR52S6;OR52…
GO:0050789	regulation of biological process	72	10387	0.810512	0.867307	ENSBTAG00000000836;ENSBTAG00000000977;ENSBTAG00000001517;ENSBTAG00000002348;ENSBTAG00000002531;ENSBTAG00000002606;ENSBTAG00000002728;ENSBTAG00000002835;ENSBTAG00000003359;ENSBTAG00000003399;ENSBTAG00000003505;ENSBTAG00000003581;ENSBTAG00000004098;ENSBTAG00000004257;ENSBTAG00000004647;ENSBTAG00000004982;ENSBTAG00000005206;ENSBTAG00000005215;ENSBTAG00000005479;ENSBTAG00000005627;ENSBTAG00000006060;…	KRT8;CADM1;KRT18;SLC4A4;ARHGAP10;LGR4;ARID1B;SMAD1;ELOVL5;SMARCA5;DCN;SETD7;ARMT1;TAF4B;UCP1;GPLD1;TMEM14A;IL10RA;LIPC;PAFAH1B2;DCDC1;ENSBTAG00000006398;PIWIL1;FZD10;ESR1;C2;GCM1;MAGED1;TMTC3;NPFFR2;SPON1;ATP2B1;PKHD1;MAML3;SS18;RASSF10;SLC1A2;ZNF827;RMND1;LMO3;EDNRA;ADGRD1;DDX39B;AKAP12;CALCOCO1;SIK3;HHIP;CARMIL1;KITLG;IL15;MAP3K4;BTG1;TFAP2B;PRR5L;ARHGEF12;RASGRP1;PRP4;PPP1R14C;SCAF8;TMEM117;TR…
GO:0050794	regulation of cellular process	69	9923	0.787075	0.853026	ENSBTAG00000000836;ENSBTAG00000000977;ENSBTAG00000001517;ENSBTAG00000002348;ENSBTAG00000002531;ENSBTAG00000002606;ENSBTAG00000002728;ENSBTAG00000002835;ENSBTAG00000003359;ENSBTAG00000003399;ENSBTAG00000003505;ENSBTAG00000003581;ENSBTAG00000004098;ENSBTAG00000004257;ENSBTAG00000004647;ENSBTAG00000004982;ENSBTAG00000005206;ENSBTAG00000005215;ENSBTAG00000005627;ENSBTAG00000006060;ENSBTAG00000006398;…	KRT8;CADM1;KRT18;SLC4A4;ARHGAP10;LGR4;ARID1B;SMAD1;ELOVL5;SMARCA5;DCN;SETD7;ARMT1;TAF4B;UCP1;GPLD1;TMEM14A;IL10RA;PAFAH1B2;DCDC1;ENSBTAG00000006398;PIWIL1;FZD10;ESR1;C2;GCM1;MAGED1;TMTC3;NPFFR2;SPON1;ATP2B1;PKHD1;MAML3;SS18;RASSF10;SLC1A2;ZNF827;RMND1;LMO3;EDNRA;ADGRD1;DDX39B;AKAP12;CALCOCO1;HHIP;CARMIL1;KITLG;IL15;MAP3K4;BTG1;TFAP2B;PRR5L;ARHGEF12;RASGRP1;PRP4;PPP1R14C;SCAF8;TMEM117;TRIM26;TRIM4…
GO:0009605	response to external stimulus	12	1910	0.758147	0.833118	ENSBTAG00000000836;ENSBTAG00000000977;ENSBTAG00000004647;ENSBTAG00000007159;ENSBTAG00000007450;ENSBTAG00000012628;ENSBTAG00000013551;ENSBTAG00000013674;ENSBTAG00000018200;ENSBTAG00000021872;ENSBTAG00000035744;ENSBTAG00000037389	KRT8;CADM1;UCP1;ESR1;C2;SLC1A2;NOX3;EDNRA;IL15;RASGRP1;TRIM26;TRIM44
GO:0097435	supramolecular fiber organization	2	624	0.946547	0.958288	ENSBTAG00000000836;ENSBTAG00000016549	KRT8;CARMIL1
GO:0030855	epithelial cell differentiation	3	497	0.71119	0.800088	ENSBTAG00000000836;ENSBTAG00000007159;ENSBTAG00000013674	KRT8;ESR1;EDNRA
GO:0060706	cell differentiation involved in embryonic placenta development	2	24	0.013284	0.320696	ENSBTAG00000000836;ENSBTAG00000008148	KRT8;GCM1
GO:0001892	embryonic placenta development	2	68	0.0891279	0.400616	ENSBTAG00000000836;ENSBTAG00000008148	KRT8;GCM1
GO:0001701	in utero embryonic development	4	327	0.219811	0.513438	ENSBTAG00000000836;ENSBTAG00000008148;ENSBTAG00000013674;ENSBTAG00000039916	KRT8;GCM1;EDNRA;SMAD2
GO:0001890	placenta development	3	110	0.0473384	0.361821	ENSBTAG00000000836;ENSBTAG00000008148;ENSBTAG00000020079	KRT8;GCM1;MAP3K4
GO:0048568	embryonic organ development	6	355	0.0470312	0.361821	ENSBTAG00000000836;ENSBTAG00000008148;ENSBTAG00000009846;ENSBTAG00000013674;ENSBTAG00000017549;ENSBTAG00000039916	KRT8;GCM1;MTHFD1L;EDNRA;KITLG;SMAD2
GO:0043009	chordate embryonic development	5	539	0.36273	0.606342	ENSBTAG00000000836;ENSBTAG00000008148;ENSBTAG00000009846;ENSBTAG00000013674;ENSBTAG00000039916	KRT8;GCM1;MTHFD1L;EDNRA;SMAD2
GO:0009792	embryo development ending in birth or egg hatching	5	549	0.377362	0.615586	ENSBTAG00000000836;ENSBTAG00000008148;ENSBTAG00000009846;ENSBTAG00000013674;ENSBTAG00000039916	KRT8;GCM1;MTHFD1L;EDNRA;SMAD2
GO:0097284	hepatocyte apoptotic process	2	13	0.00395708	0.320696	ENSBTAG00000000836;ENSBTAG00000001517	KRT8;KRT18
GO:0033209	tumor necrosis factor-mediated signaling pathway	2	73	0.100465	0.410002	ENSBTAG00000000836;ENSBTAG00000001517	KRT8;KRT18
GO:0071356	cellular response to tumor necrosis factor	2	137	0.266448	0.538677	ENSBTAG00000000836;ENSBTAG00000001517	KRT8;KRT18
GO:0034612	response to tumor necrosis factor	2	154	0.312618	0.572484	ENSBTAG00000000836;ENSBTAG00000001517	KRT8;KRT18
GO:0007165	signal transduction	42	5360	0.335987	0.589097	ENSBTAG00000000836;ENSBTAG00000001517;ENSBTAG00000002531;ENSBTAG00000002606;ENSBTAG00000002835;ENSBTAG00000003505;ENSBTAG00000004982;ENSBTAG00000005206;ENSBTAG00000005215;ENSBTAG00000006060;ENSBTAG00000007047;ENSBTAG00000007159;ENSBTAG00000009070;ENSBTAG00000011237;ENSBTAG00000011373;ENSBTAG00000011531;ENSBTAG00000011914;ENSBTAG00000013541;ENSBTAG00000013674;ENSBTAG00000013848;ENSBTAG00000014490;…	KRT8;KRT18;ARHGAP10;LGR4;SMAD1;DCN;GPLD1;TMEM14A;IL10RA;DCDC1;FZD10;ESR1;NPFFR2;PKHD1;MAML3;SS18;RASSF10;LMO3;EDNRA;ADGRD1;DDX39B;AKAP12;CALCOCO1;HHIP;KITLG;IL15;MAP3K4;TFAP2B;PRR5L;ARHGEF12;RASGRP1;PRP4;TMEM117;TRIM44;SMAD2;OR52A5EP;ENSBTAG00000048304;ENSBTAG00000051946;OR52S6;OR52A1E;OR9G1;OR7A85
GO:0051716	cellular response to stimulus	52	6528	0.253999	0.536776	ENSBTAG00000000836;ENSBTAG00000001517;ENSBTAG00000002531;ENSBTAG00000002606;ENSBTAG00000002835;ENSBTAG00000003399;ENSBTAG00000003505;ENSBTAG00000003581;ENSBTAG00000004098;ENSBTAG00000004288;ENSBTAG00000004647;ENSBTAG00000004982;ENSBTAG00000005206;ENSBTAG00000005215;ENSBTAG00000006060;ENSBTAG00000007047;ENSBTAG00000007159;ENSBTAG00000009023;ENSBTAG00000009070;ENSBTAG00000009552;ENSBTAG00000011237;…	KRT8;KRT18;ARHGAP10;LGR4;SMAD1;SMARCA5;DCN;SETD7;ARMT1;GSTA4;UCP1;GPLD1;TMEM14A;IL10RA;DCDC1;FZD10;ESR1;TMTC3;NPFFR2;ATP2B1;PKHD1;MAML3;SS18;RASSF10;SLC1A2;LMO3;EDNRA;ADGRD1;DDX39B;AKAP12;CALCOCO1;HHIP;KITLG;IL15;MAP3K4;TFAP2B;PRR5L;ARHGEF12;RASGRP1;PRP4;ENSBTAG00000025485;TMEM117;TRIM44;GSTA5;SMAD2;OR52A5EP;ENSBTAG00000048304;ENSBTAG00000051946;OR52S6;OR52A1E;OR9G1;OR7A85
GO:1904019	epithelial cell apoptotic process	5	91	0.000553364	0.261963	ENSBTAG00000000836;ENSBTAG00000001517;ENSBTAG00000007159;ENSBTAG00000011237;ENSBTAG00000013674	KRT8;KRT18;ESR1;PKHD1;EDNRA
GO:0006915	apoptotic process	11	1221	0.284783	0.557554	ENSBTAG00000000836;ENSBTAG00000001517;ENSBTAG00000004982;ENSBTAG00000005206;ENSBTAG00000007159;ENSBTAG00000008733;ENSBTAG00000011237;ENSBTAG00000013674;ENSBTAG00000017549;ENSBTAG00000020426;ENSBTAG00000032148	KRT8;KRT18;GPLD1;TMEM14A;ESR1;MAGED1;PKHD1;EDNRA;KITLG;TFAP2B;TMEM117
GO:0012501	programmed cell death	11	1272	0.331438	0.585506	ENSBTAG00000000836;ENSBTAG00000001517;ENSBTAG00000004982;ENSBTAG00000005206;ENSBTAG00000007159;ENSBTAG00000008733;ENSBTAG00000011237;ENSBTAG00000013674;ENSBTAG00000017549;ENSBTAG00000020426;ENSBTAG00000032148	KRT8;KRT18;GPLD1;TMEM14A;ESR1;MAGED1;PKHD1;EDNRA;KITLG;TFAP2B;TMEM117
GO:0008219	cell death	11	1363	0.417964	0.642006	ENSBTAG00000000836;ENSBTAG00000001517;ENSBTAG00000004982;ENSBTAG00000005206;ENSBTAG00000007159;ENSBTAG00000008733;ENSBTAG00000011237;ENSBTAG00000013674;ENSBTAG00000017549;ENSBTAG00000020426;ENSBTAG00000032148	KRT8;KRT18;GPLD1;TMEM14A;ESR1;MAGED1;PKHD1;EDNRA;KITLG;TFAP2B;TMEM117
GO:0019221	cytokine-mediated signaling pathway	4	348	0.252941	0.536776	ENSBTAG00000000836;ENSBTAG00000001517;ENSBTAG00000018200;ENSBTAG00000037389	KRT8;KRT18;IL15;TRIM44
GO:0097191	extrinsic apoptotic signaling pathway	3	171	0.131325	0.446618	ENSBTAG00000000836;ENSBTAG00000001517;ENSBTAG00000017549	KRT8;KRT18;KITLG
GO:0045104	intermediate filament cytoskeleton organization	3	72	0.0159587	0.334809	ENSBTAG00000000836;ENSBTAG00000001517;ENSBTAG00000045662	KRT8;KRT18;KRT3
GO:0045103	intermediate filament-based process	3	73	0.0165552	0.334809	ENSBTAG00000000836;ENSBTAG00000001517;ENSBTAG00000045662	KRT8;KRT18;KRT3
GO:0007166	cell surface receptor signaling pathway	19	2110	0.203081	0.506393	ENSBTAG00000000836;ENSBTAG00000001517;ENSBTAG00000002606;ENSBTAG00000002835;ENSBTAG00000003505;ENSBTAG00000004982;ENSBTAG00000005215;ENSBTAG00000007047;ENSBTAG00000011373;ENSBTAG00000011531;ENSBTAG00000013674;ENSBTAG00000013848;ENSBTAG00000016071;ENSBTAG00000017549;ENSBTAG00000018200;ENSBTAG00000020426;ENSBTAG00000037389;ENSBTAG00000039916;ENSBTAG00000048304	KRT8;KRT18;LGR4;SMAD1;DCN;GPLD1;IL10RA;FZD10;MAML3;SS18;EDNRA;ADGRD1;HHIP;KITLG;IL15;TFAP2B;TRIM44;SMAD2;ENSBTAG00000048304
GO:0070887	cellular response to chemical stimulus	22	2162	0.069269	0.376331	ENSBTAG00000000836;ENSBTAG00000001517;ENSBTAG00000002835;ENSBTAG00000003399;ENSBTAG00000003505;ENSBTAG00000004288;ENSBTAG00000004647;ENSBTAG00000004982;ENSBTAG00000007159;ENSBTAG00000009552;ENSBTAG00000012628;ENSBTAG00000013541;ENSBTAG00000013674;ENSBTAG00000015016;ENSBTAG00000016071;ENSBTAG00000018200;ENSBTAG00000020426;ENSBTAG00000021029;ENSBTAG00000025485;ENSBTAG00000037389;ENSBTAG00000037949;…	KRT8;KRT18;SMAD1;SMARCA5;DCN;GSTA4;UCP1;GPLD1;ESR1;ATP2B1;SLC1A2;LMO3;EDNRA;CALCOCO1;HHIP;IL15;TFAP2B;PRR5L;ENSBTAG00000025485;TRIM44;GSTA5;SMAD2
GO:0042221	response to chemical	27	3671	0.531552	0.697785	ENSBTAG00000000836;ENSBTAG00000001517;ENSBTAG00000002835;ENSBTAG00000003399;ENSBTAG00000003505;ENSBTAG00000004288;ENSBTAG00000004647;ENSBTAG00000004982;ENSBTAG00000007159;ENSBTAG00000009552;ENSBTAG00000011531;ENSBTAG00000012628;ENSBTAG00000013541;ENSBTAG00000013674;ENSBTAG00000015016;ENSBTAG00000016071;ENSBTAG00000018200;ENSBTAG00000020426;ENSBTAG00000021029;ENSBTAG00000025485;ENSBTAG00000037389;…	KRT8;KRT18;SMAD1;SMARCA5;DCN;GSTA4;UCP1;GPLD1;ESR1;ATP2B1;SS18;SLC1A2;LMO3;EDNRA;CALCOCO1;HHIP;IL15;TFAP2B;PRR5L;ENSBTAG00000025485;TRIM44;GSTA5;SMAD2;OR52A5EP;ENSBTAG00000051946;OR52S6;OR52A1E
GO:0071310	cellular response to organic substance	18	1685	0.0670891	0.376331	ENSBTAG00000000836;ENSBTAG00000001517;ENSBTAG00000002835;ENSBTAG00000003399;ENSBTAG00000003505;ENSBTAG00000004647;ENSBTAG00000004982;ENSBTAG00000007159;ENSBTAG00000009552;ENSBTAG00000012628;ENSBTAG00000013541;ENSBTAG00000013674;ENSBTAG00000015016;ENSBTAG00000016071;ENSBTAG00000018200;ENSBTAG00000020426;ENSBTAG00000037389;ENSBTAG00000039916	KRT8;KRT18;SMAD1;SMARCA5;DCN;UCP1;GPLD1;ESR1;ATP2B1;SLC1A2;LMO3;EDNRA;CALCOCO1;HHIP;IL15;TFAP2B;TRIM44;SMAD2
GO:0010033	response to organic substance	18	2034	0.233585	0.519205	ENSBTAG00000000836;ENSBTAG00000001517;ENSBTAG00000002835;ENSBTAG00000003399;ENSBTAG00000003505;ENSBTAG00000004647;ENSBTAG00000004982;ENSBTAG00000007159;ENSBTAG00000009552;ENSBTAG00000012628;ENSBTAG00000013541;ENSBTAG00000013674;ENSBTAG00000015016;ENSBTAG00000016071;ENSBTAG00000018200;ENSBTAG00000020426;ENSBTAG00000037389;ENSBTAG00000039916	KRT8;KRT18;SMAD1;SMARCA5;DCN;UCP1;GPLD1;ESR1;ATP2B1;SLC1A2;LMO3;EDNRA;CALCOCO1;HHIP;IL15;TFAP2B;TRIM44;SMAD2
GO:0071345	cellular response to cytokine stimulus	5	587	0.432802	0.647797	ENSBTAG00000000836;ENSBTAG00000001517;ENSBTAG00000003399;ENSBTAG00000018200;ENSBTAG00000037389	KRT8;KRT18;SMARCA5;IL15;TRIM44
GO:0034097	response to cytokine	5	641	0.509633	0.684442	ENSBTAG00000000836;ENSBTAG00000001517;ENSBTAG00000003399;ENSBTAG00000018200;ENSBTAG00000037389	KRT8;KRT18;SMARCA5;IL15;TRIM44
GO:0097190	apoptotic signaling pathway	5	440	0.222554	0.513438	ENSBTAG00000000836;ENSBTAG00000001517;ENSBTAG00000005206;ENSBTAG00000017549;ENSBTAG00000032148	KRT8;KRT18;TMEM14A;KITLG;TMEM117
GO:0008544	epidermis development	2	246	0.541673	0.703709	ENSBTAG00000000836;ENSBTAG00000002606	KRT8;LGR4
GO:0048608	reproductive structure development	6	317	0.0295717	0.33491	ENSBTAG00000000836;ENSBTAG00000002606;ENSBTAG00000007159;ENSBTAG00000008148;ENSBTAG00000017549;ENSBTAG00000020079	KRT8;LGR4;ESR1;GCM1;KITLG;MAP3K4
GO:0061458	reproductive system development	6	320	0.0307637	0.341682	ENSBTAG00000000836;ENSBTAG00000002606;ENSBTAG00000007159;ENSBTAG00000008148;ENSBTAG00000017549;ENSBTAG00000020079	KRT8;LGR4;ESR1;GCM1;KITLG;MAP3K4
GO:0003006	developmental process involved in reproduction	10	656	0.0227116	0.334809	ENSBTAG00000000836;ENSBTAG00000002606;ENSBTAG00000005627;ENSBTAG00000006468;ENSBTAG00000007159;ENSBTAG00000008148;ENSBTAG00000013674;ENSBTAG00000017549;ENSBTAG00000018085;ENSBTAG00000020079	KRT8;LGR4;PAFAH1B2;PIWIL1;ESR1;GCM1;EDNRA;KITLG;GTSF1;MAP3K4
GO:0007275	multicellular organism development	25	3716	0.723226	0.807489	ENSBTAG00000000836;ENSBTAG00000002606;ENSBTAG00000002835;ENSBTAG00000003505;ENSBTAG00000004982;ENSBTAG00000007159;ENSBTAG00000008148;ENSBTAG00000009180;ENSBTAG00000009552;ENSBTAG00000009846;ENSBTAG00000011237;ENSBTAG00000011914;ENSBTAG00000012628;ENSBTAG00000013551;ENSBTAG00000013674;ENSBTAG00000014272;ENSBTAG00000015119;ENSBTAG00000016071;ENSBTAG00000017549;ENSBTAG00000018200;ENSBTAG00000020079;…	KRT8;LGR4;SMAD1;DCN;GPLD1;ESR1;GCM1;NRSN1;ATP2B1;MTHFD1L;PKHD1;RASSF10;SLC1A2;NOX3;EDNRA;MMUT;SIK3;HHIP;KITLG;IL15;MAP3K4;TFAP2B;RASGRP1;SLC10A7;SMAD2
GO:0048731	system development	24	3433	0.641721	0.763677	ENSBTAG00000000836;ENSBTAG00000002606;ENSBTAG00000002835;ENSBTAG00000003505;ENSBTAG00000004982;ENSBTAG00000007159;ENSBTAG00000008148;ENSBTAG00000009180;ENSBTAG00000009552;ENSBTAG00000009846;ENSBTAG00000011237;ENSBTAG00000011914;ENSBTAG00000012628;ENSBTAG00000013551;ENSBTAG00000013674;ENSBTAG00000015119;ENSBTAG00000016071;ENSBTAG00000017549;ENSBTAG00000018200;ENSBTAG00000020079;ENSBTAG00000020426;…	KRT8;LGR4;SMAD1;DCN;GPLD1;ESR1;GCM1;NRSN1;ATP2B1;MTHFD1L;PKHD1;RASSF10;SLC1A2;NOX3;EDNRA;SIK3;HHIP;KITLG;IL15;MAP3K4;TFAP2B;RASGRP1;SLC10A7;SMAD2
GO:0048513	animal organ development	20	2500	0.375799	0.61482	ENSBTAG00000000836;ENSBTAG00000002606;ENSBTAG00000002835;ENSBTAG00000007159;ENSBTAG00000008148;ENSBTAG00000009552;ENSBTAG00000009846;ENSBTAG00000011237;ENSBTAG00000012628;ENSBTAG00000013551;ENSBTAG00000013674;ENSBTAG00000015119;ENSBTAG00000016071;ENSBTAG00000017549;ENSBTAG00000018200;ENSBTAG00000020079;ENSBTAG00000020426;ENSBTAG00000021872;ENSBTAG00000034522;ENSBTAG00000039916	KRT8;LGR4;SMAD1;ESR1;GCM1;ATP2B1;MTHFD1L;PKHD1;SLC1A2;NOX3;EDNRA;SIK3;HHIP;KITLG;IL15;MAP3K4;TFAP2B;RASGRP1;SLC10A7;SMAD2
GO:0022414	reproductive process	11	964	0.0971409	0.405515	ENSBTAG00000000836;ENSBTAG00000002606;ENSBTAG00000002835;ENSBTAG00000005627;ENSBTAG00000006468;ENSBTAG00000007159;ENSBTAG00000008148;ENSBTAG00000013674;ENSBTAG00000017549;ENSBTAG00000018085;ENSBTAG00000020079	KRT8;LGR4;SMAD1;PAFAH1B2;PIWIL1;ESR1;GCM1;EDNRA;KITLG;GTSF1;MAP3K4
GO:0000003	reproduction	11	967	0.0987311	0.406429	ENSBTAG00000000836;ENSBTAG00000002606;ENSBTAG00000002835;ENSBTAG00000005627;ENSBTAG00000006468;ENSBTAG00000007159;ENSBTAG00000008148;ENSBTAG00000013674;ENSBTAG00000017549;ENSBTAG00000018085;ENSBTAG00000020079	KRT8;LGR4;SMAD1;PAFAH1B2;PIWIL1;ESR1;GCM1;EDNRA;KITLG;GTSF1;MAP3K4
GO:0030154	cell differentiation	18	2934	0.831487	0.882738	ENSBTAG00000000836;ENSBTAG00000002606;ENSBTAG00000002835;ENSBTAG00000004647;ENSBTAG00000006468;ENSBTAG00000007159;ENSBTAG00000008148;ENSBTAG00000011914;ENSBTAG00000013541;ENSBTAG00000013674;ENSBTAG00000016071;ENSBTAG00000016549;ENSBTAG00000017549;ENSBTAG00000018200;ENSBTAG00000020079;ENSBTAG00000020426;ENSBTAG00000021872;ENSBTAG00000039916	KRT8;LGR4;SMAD1;UCP1;PIWIL1;ESR1;GCM1;RASSF10;LMO3;EDNRA;HHIP;CARMIL1;KITLG;IL15;MAP3K4;TFAP2B;RASGRP1;SMAD2
GO:0048869	cellular developmental process	18	2992	0.85507	0.898599	ENSBTAG00000000836;ENSBTAG00000002606;ENSBTAG00000002835;ENSBTAG00000004647;ENSBTAG00000006468;ENSBTAG00000007159;ENSBTAG00000008148;ENSBTAG00000011914;ENSBTAG00000013541;ENSBTAG00000013674;ENSBTAG00000016071;ENSBTAG00000016549;ENSBTAG00000017549;ENSBTAG00000018200;ENSBTAG00000020079;ENSBTAG00000020426;ENSBTAG00000021872;ENSBTAG00000039916	KRT8;LGR4;SMAD1;UCP1;PIWIL1;ESR1;GCM1;RASSF10;LMO3;EDNRA;HHIP;CARMIL1;KITLG;IL15;MAP3K4;TFAP2B;RASGRP1;SMAD2
GO:0043588	skin development	3	223	0.225379	0.513438	ENSBTAG00000000836;ENSBTAG00000002606;ENSBTAG00000020426	KRT8;LGR4;TFAP2B
GO:0023052	signaling	43	5723	0.459949	0.655758	ENSBTAG00000000836;ENSBTAG00000001460;ENSBTAG00000001517;ENSBTAG00000002531;ENSBTAG00000002606;ENSBTAG00000002835;ENSBTAG00000003505;ENSBTAG00000004982;ENSBTAG00000005206;ENSBTAG00000005215;ENSBTAG00000006060;ENSBTAG00000007047;ENSBTAG00000007159;ENSBTAG00000009070;ENSBTAG00000011237;ENSBTAG00000011373;ENSBTAG00000011531;ENSBTAG00000011914;ENSBTAG00000013541;ENSBTAG00000013674;ENSBTAG00000013848;…	KRT8;LIN7C;KRT18;ARHGAP10;LGR4;SMAD1;DCN;GPLD1;TMEM14A;IL10RA;DCDC1;FZD10;ESR1;NPFFR2;PKHD1;MAML3;SS18;RASSF10;LMO3;EDNRA;ADGRD1;DDX39B;AKAP12;CALCOCO1;HHIP;KITLG;IL15;MAP3K4;TFAP2B;PRR5L;ARHGEF12;RASGRP1;PRP4;TMEM117;TRIM44;SMAD2;OR52A5EP;ENSBTAG00000048304;ENSBTAG00000051946;OR52S6;OR52A1E;OR9G1;OR7A85
GO:0007154	cell communication	44	5774	0.413586	0.639842	ENSBTAG00000000836;ENSBTAG00000001460;ENSBTAG00000001517;ENSBTAG00000002531;ENSBTAG00000002606;ENSBTAG00000002835;ENSBTAG00000003505;ENSBTAG00000004982;ENSBTAG00000005206;ENSBTAG00000005215;ENSBTAG00000006060;ENSBTAG00000007047;ENSBTAG00000007159;ENSBTAG00000009070;ENSBTAG00000011237;ENSBTAG00000011373;ENSBTAG00000011531;ENSBTAG00000011914;ENSBTAG00000012628;ENSBTAG00000013541;ENSBTAG00000013674;…	KRT8;LIN7C;KRT18;ARHGAP10;LGR4;SMAD1;DCN;GPLD1;TMEM14A;IL10RA;DCDC1;FZD10;ESR1;NPFFR2;PKHD1;MAML3;SS18;RASSF10;SLC1A2;LMO3;EDNRA;ADGRD1;DDX39B;AKAP12;CALCOCO1;HHIP;KITLG;IL15;MAP3K4;TFAP2B;PRR5L;ARHGEF12;RASGRP1;PRP4;TMEM117;TRIM44;SMAD2;OR52A5EP;ENSBTAG00000048304;ENSBTAG00000051946;OR52S6;OR52A1E;OR9G1;OR7A85
GO:0048856	anatomical structure development	29	4200	0.682177	0.784145	ENSBTAG00000000836;ENSBTAG00000001460;ENSBTAG00000002606;ENSBTAG00000002835;ENSBTAG00000003505;ENSBTAG00000004982;ENSBTAG00000006468;ENSBTAG00000007159;ENSBTAG00000008148;ENSBTAG00000009180;ENSBTAG00000009552;ENSBTAG00000009846;ENSBTAG00000011237;ENSBTAG00000011531;ENSBTAG00000011914;ENSBTAG00000012628;ENSBTAG00000013551;ENSBTAG00000013674;ENSBTAG00000014272;ENSBTAG00000015119;ENSBTAG00000016071;…	KRT8;LIN7C;LGR4;SMAD1;DCN;GPLD1;PIWIL1;ESR1;GCM1;NRSN1;ATP2B1;MTHFD1L;PKHD1;SS18;RASSF10;SLC1A2;NOX3;EDNRA;MMUT;SIK3;HHIP;CARMIL1;KITLG;IL15;MAP3K4;TFAP2B;RASGRP1;SLC10A7;SMAD2
GO:0032502	developmental process	33	4548	0.566137	0.715378	ENSBTAG00000000836;ENSBTAG00000001460;ENSBTAG00000002606;ENSBTAG00000002835;ENSBTAG00000003505;ENSBTAG00000004647;ENSBTAG00000004982;ENSBTAG00000005627;ENSBTAG00000006468;ENSBTAG00000007159;ENSBTAG00000008148;ENSBTAG00000009180;ENSBTAG00000009552;ENSBTAG00000009846;ENSBTAG00000011237;ENSBTAG00000011531;ENSBTAG00000011914;ENSBTAG00000012628;ENSBTAG00000013541;ENSBTAG00000013551;ENSBTAG00000013674;…	KRT8;LIN7C;LGR4;SMAD1;DCN;UCP1;GPLD1;PAFAH1B2;PIWIL1;ESR1;GCM1;NRSN1;ATP2B1;MTHFD1L;PKHD1;SS18;RASSF10;SLC1A2;LMO3;NOX3;EDNRA;MMUT;SIK3;HHIP;CARMIL1;KITLG;GTSF1;IL15;MAP3K4;TFAP2B;RASGRP1;SLC10A7;SMAD2
GO:0009888	tissue development	15	1431	0.10215	0.413044	ENSBTAG00000000836;ENSBTAG00000001460;ENSBTAG00000002606;ENSBTAG00000002835;ENSBTAG00000007159;ENSBTAG00000008148;ENSBTAG00000009552;ENSBTAG00000009846;ENSBTAG00000011237;ENSBTAG00000013674;ENSBTAG00000015119;ENSBTAG00000016071;ENSBTAG00000017549;ENSBTAG00000020426;ENSBTAG00000039916	KRT8;LIN7C;LGR4;SMAD1;ESR1;GCM1;ATP2B1;MTHFD1L;PKHD1;EDNRA;SIK3;HHIP;KITLG;TFAP2B;SMAD2
GO:0060429	epithelium development	12	887	0.0299015	0.337033	ENSBTAG00000000836;ENSBTAG00000001460;ENSBTAG00000002606;ENSBTAG00000002835;ENSBTAG00000007159;ENSBTAG00000008148;ENSBTAG00000009846;ENSBTAG00000011237;ENSBTAG00000013674;ENSBTAG00000016071;ENSBTAG00000020426;ENSBTAG00000039916	KRT8;LIN7C;LGR4;SMAD1;ESR1;GCM1;MTHFD1L;PKHD1;EDNRA;HHIP;TFAP2B;SMAD2
GO:0009790	embryo development	7	882	0.472022	0.661893	ENSBTAG00000000836;ENSBTAG00000002835;ENSBTAG00000008148;ENSBTAG00000009846;ENSBTAG00000013674;ENSBTAG00000017549;ENSBTAG00000039916	KRT8;SMAD1;GCM1;MTHFD1L;EDNRA;KITLG;SMAD2
GO:0006898	receptor-mediated endocytosis	1	161	0.696453	0.791789	ENSBTAG00000044158	LDLRAD3
GO:0060995	cell-cell signaling involved in kidney development	1	2	0.0146325	0.320696	ENSBTAG00000002606	LGR4
GO:0061289	Wnt signaling pathway involved in kidney development	1	2	0.0146325	0.320696	ENSBTAG00000002606	LGR4
GO:0061290	canonical Wnt signaling pathway involved in metanephric kidney development	1	2	0.0146325	0.320696	ENSBTAG00000002606	LGR4
GO:0072204	cell-cell signaling involved in metanephros development	1	2	0.0146325	0.320696	ENSBTAG00000002606	LGR4
GO:0036335	intestinal stem cell homeostasis	1	3	0.0218689	0.334809	ENSBTAG00000002606	LGR4
GO:2001013	epithelial cell proliferation involved in renal tubule morphogenesis	1	3	0.0218689	0.334809	ENSBTAG00000002606	LGR4
GO:0072282	metanephric nephron tubule morphogenesis	1	5	0.036184	0.348894	ENSBTAG00000002606	LGR4
GO:0072173	metanephric tubule morphogenesis	1	6	0.0432634	0.3507	ENSBTAG00000002606	LGR4
GO:0072224	metanephric glomerulus development	1	9	0.0641935	0.369698	ENSBTAG00000002606	LGR4
GO:0090190	positive regulation of branching involved in ureteric bud morphogenesis	1	13	0.0913953	0.400616	ENSBTAG00000002606	LGR4
GO:0072234	metanephric nephron tubule development	1	15	0.104701	0.413044	ENSBTAG00000002606	LGR4
GO:0090189	regulation of branching involved in ureteric bud morphogenesis	1	15	0.104701	0.413044	ENSBTAG00000002606	LGR4
GO:0072170	metanephric tubule development	1	16	0.111281	0.422795	ENSBTAG00000002606	LGR4
GO:0072243	metanephric nephron epithelium development	1	18	0.124297	0.437164	ENSBTAG00000002606	LGR4
GO:0030539	male genitalia development	1	19	0.130734	0.44589	ENSBTAG00000002606	LGR4
GO:0072202	cell differentiation involved in metanephros development	1	20	0.137124	0.450796	ENSBTAG00000002606	LGR4
GO:0072273	metanephric nephron morphogenesis	1	20	0.137124	0.450796	ENSBTAG00000002606	LGR4
GO:0090183	regulation of kidney development	1	21	0.143468	0.456453	ENSBTAG00000002606	LGR4
GO:0072207	metanephric epithelium development	1	22	0.149765	0.457321	ENSBTAG00000002606	LGR4
GO:0003338	metanephros morphogenesis	1	25	0.168383	0.474479	ENSBTAG00000002606	LGR4
GO:1905332	positive regulation of morphogenesis of an epithelium	1	25	0.168383	0.474479	ENSBTAG00000002606	LGR4
GO:0034122	negative regulation of toll-like receptor signaling pathway	1	27	0.180569	0.480233	ENSBTAG00000002606	LGR4
GO:0001658	branching involved in ureteric bud morphogenesis	1	51	0.313693	0.572484	ENSBTAG00000002606	LGR4
GO:0060675	ureteric bud morphogenesis	1	58	0.34831	0.598294	ENSBTAG00000002606	LGR4
GO:0072171	mesonephric tubule morphogenesis	1	59	0.353111	0.601738	ENSBTAG00000002606	LGR4
GO:0072078	nephron tubule morphogenesis	1	66	0.385755	0.62199	ENSBTAG00000002606	LGR4
GO:0072088	nephron epithelium morphogenesis	1	68	0.394778	0.628325	ENSBTAG00000002606	LGR4
GO:0046849	bone remodeling	1	69	0.39924	0.628325	ENSBTAG00000002606	LGR4
GO:0061333	renal tubule morphogenesis	1	69	0.39924	0.628325	ENSBTAG00000002606	LGR4
GO:0072028	nephron morphogenesis	1	70	0.403669	0.631934	ENSBTAG00000002606	LGR4
GO:0001942	hair follicle development	1	80	0.446219	0.650369	ENSBTAG00000002606	LGR4
GO:0090263	positive regulation of canonical Wnt signaling pathway	1	82	0.45436	0.653781	ENSBTAG00000002606	LGR4
GO:0022404	molting cycle process	1	83	0.458386	0.655193	ENSBTAG00000002606	LGR4
GO:0022405	hair cycle process	1	83	0.458386	0.655193	ENSBTAG00000002606	LGR4
GO:0060993	kidney morphogenesis	1	83	0.458386	0.655193	ENSBTAG00000002606	LGR4
GO:0098773	skin epidermis development	1	84	0.462383	0.655758	ENSBTAG00000002606	LGR4
GO:0042303	molting cycle	1	97	0.511751	0.684442	ENSBTAG00000002606	LGR4
GO:0042633	hair cycle	1	97	0.511751	0.684442	ENSBTAG00000002606	LGR4
GO:0030177	positive regulation of Wnt signaling pathway	1	111	0.559897	0.712897	ENSBTAG00000002606	LGR4
GO:0060828	regulation of canonical Wnt signaling pathway	1	202	0.776345	0.845099	ENSBTAG00000002606	LGR4
GO:0030111	regulation of Wnt signaling pathway	1	254	0.848339	0.89444	ENSBTAG00000002606	LGR4
GO:0044249	cellular biosynthetic process	36	4813	0.481748	0.665317	ENSBTAG00000002606;ENSBTAG00000002728;ENSBTAG00000002835;ENSBTAG00000003359;ENSBTAG00000003399;ENSBTAG00000003505;ENSBTAG00000003581;ENSBTAG00000004257;ENSBTAG00000004647;ENSBTAG00000005479;ENSBTAG00000006468;ENSBTAG00000006936;ENSBTAG00000007159;ENSBTAG00000008148;ENSBTAG00000009023;ENSBTAG00000009846;ENSBTAG00000011237;ENSBTAG00000011373;ENSBTAG00000011531;ENSBTAG00000012628;ENSBTAG00000012738;…	LGR4;ARID1B;SMAD1;ELOVL5;SMARCA5;DCN;SETD7;TAF4B;UCP1;LIPC;PIWIL1;MRPS18B;ESR1;GCM1;TMTC3;MTHFD1L;PKHD1;MAML3;SS18;SLC1A2;ZNF827;RMND1;INPP4B;MMUT;DDX39B;CALCOCO1;HS3ST2;IL15;MAP3K4;TFAP2B;SCAF8;SLC10A7;TRIM26;TRIM44;SMAD2;KCTD1
GO:1901576	organic substance biosynthetic process	36	4876	0.518533	0.688522	ENSBTAG00000002606;ENSBTAG00000002728;ENSBTAG00000002835;ENSBTAG00000003359;ENSBTAG00000003399;ENSBTAG00000003505;ENSBTAG00000003581;ENSBTAG00000004257;ENSBTAG00000004647;ENSBTAG00000005479;ENSBTAG00000006468;ENSBTAG00000006936;ENSBTAG00000007159;ENSBTAG00000008148;ENSBTAG00000009023;ENSBTAG00000009846;ENSBTAG00000011237;ENSBTAG00000011373;ENSBTAG00000011531;ENSBTAG00000012628;ENSBTAG00000012738;…	LGR4;ARID1B;SMAD1;ELOVL5;SMARCA5;DCN;SETD7;TAF4B;UCP1;LIPC;PIWIL1;MRPS18B;ESR1;GCM1;TMTC3;MTHFD1L;PKHD1;MAML3;SS18;SLC1A2;ZNF827;RMND1;INPP4B;MMUT;DDX39B;CALCOCO1;HS3ST2;IL15;MAP3K4;TFAP2B;SCAF8;SLC10A7;TRIM26;TRIM44;SMAD2;KCTD1
GO:0009058	biosynthetic process	37	4946	0.48026	0.665317	ENSBTAG00000002606;ENSBTAG00000002728;ENSBTAG00000002835;ENSBTAG00000003359;ENSBTAG00000003399;ENSBTAG00000003505;ENSBTAG00000003581;ENSBTAG00000004257;ENSBTAG00000004647;ENSBTAG00000005479;ENSBTAG00000006468;ENSBTAG00000006936;ENSBTAG00000007159;ENSBTAG00000008148;ENSBTAG00000009023;ENSBTAG00000009112;ENSBTAG00000009846;ENSBTAG00000011237;ENSBTAG00000011373;ENSBTAG00000011531;ENSBTAG00000012628;…	LGR4;ARID1B;SMAD1;ELOVL5;SMARCA5;DCN;SETD7;TAF4B;UCP1;LIPC;PIWIL1;MRPS18B;ESR1;GCM1;TMTC3;TRAM2;MTHFD1L;PKHD1;MAML3;SS18;SLC1A2;ZNF827;RMND1;INPP4B;MMUT;DDX39B;CALCOCO1;HS3ST2;IL15;MAP3K4;TFAP2B;SCAF8;SLC10A7;TRIM26;TRIM44;SMAD2;KCTD1
GO:0031326	regulation of cellular biosynthetic process	27	3254	0.271021	0.544016	ENSBTAG00000002606;ENSBTAG00000002728;ENSBTAG00000002835;ENSBTAG00000003359;ENSBTAG00000003399;ENSBTAG00000003505;ENSBTAG00000003581;ENSBTAG00000004257;ENSBTAG00000004647;ENSBTAG00000006468;ENSBTAG00000007159;ENSBTAG00000008148;ENSBTAG00000011237;ENSBTAG00000011373;ENSBTAG00000011531;ENSBTAG00000012738;ENSBTAG00000013224;ENSBTAG00000014490;ENSBTAG00000015016;ENSBTAG00000018200;ENSBTAG00000020079;…	LGR4;ARID1B;SMAD1;ELOVL5;SMARCA5;DCN;SETD7;TAF4B;UCP1;PIWIL1;ESR1;GCM1;PKHD1;MAML3;SS18;ZNF827;RMND1;DDX39B;CALCOCO1;IL15;MAP3K4;TFAP2B;SCAF8;TRIM26;TRIM44;SMAD2;KCTD1
GO:0009889	regulation of biosynthetic process	27	3300	0.297495	0.560947	ENSBTAG00000002606;ENSBTAG00000002728;ENSBTAG00000002835;ENSBTAG00000003359;ENSBTAG00000003399;ENSBTAG00000003505;ENSBTAG00000003581;ENSBTAG00000004257;ENSBTAG00000004647;ENSBTAG00000006468;ENSBTAG00000007159;ENSBTAG00000008148;ENSBTAG00000011237;ENSBTAG00000011373;ENSBTAG00000011531;ENSBTAG00000012738;ENSBTAG00000013224;ENSBTAG00000014490;ENSBTAG00000015016;ENSBTAG00000018200;ENSBTAG00000020079;…	LGR4;ARID1B;SMAD1;ELOVL5;SMARCA5;DCN;SETD7;TAF4B;UCP1;PIWIL1;ESR1;GCM1;PKHD1;MAML3;SS18;ZNF827;RMND1;DDX39B;CALCOCO1;IL15;MAP3K4;TFAP2B;SCAF8;TRIM26;TRIM44;SMAD2;KCTD1
GO:0031328	positive regulation of cellular biosynthetic process	20	1544	0.00873223	0.320696	ENSBTAG00000002606;ENSBTAG00000002728;ENSBTAG00000002835;ENSBTAG00000003359;ENSBTAG00000003399;ENSBTAG00000003505;ENSBTAG00000004257;ENSBTAG00000007159;ENSBTAG00000008148;ENSBTAG00000011373;ENSBTAG00000011531;ENSBTAG00000013224;ENSBTAG00000014490;ENSBTAG00000015016;ENSBTAG00000018200;ENSBTAG00000020079;ENSBTAG00000020426;ENSBTAG00000031917;ENSBTAG00000037389;ENSBTAG00000039916	LGR4;ARID1B;SMAD1;ELOVL5;SMARCA5;DCN;TAF4B;ESR1;GCM1;MAML3;SS18;RMND1;DDX39B;CALCOCO1;IL15;MAP3K4;TFAP2B;SCAF8;TRIM44;SMAD2
GO:0009891	positive regulation of biosynthetic process	20	1564	0.0099938	0.320696	ENSBTAG00000002606;ENSBTAG00000002728;ENSBTAG00000002835;ENSBTAG00000003359;ENSBTAG00000003399;ENSBTAG00000003505;ENSBTAG00000004257;ENSBTAG00000007159;ENSBTAG00000008148;ENSBTAG00000011373;ENSBTAG00000011531;ENSBTAG00000013224;ENSBTAG00000014490;ENSBTAG00000015016;ENSBTAG00000018200;ENSBTAG00000020079;ENSBTAG00000020426;ENSBTAG00000031917;ENSBTAG00000037389;ENSBTAG00000039916	LGR4;ARID1B;SMAD1;ELOVL5;SMARCA5;DCN;TAF4B;ESR1;GCM1;MAML3;SS18;RMND1;DDX39B;CALCOCO1;IL15;MAP3K4;TFAP2B;SCAF8;TRIM44;SMAD2
GO:0018130	heterocycle biosynthetic process	25	3268	0.44535	0.650369	ENSBTAG00000002606;ENSBTAG00000002728;ENSBTAG00000002835;ENSBTAG00000003399;ENSBTAG00000003505;ENSBTAG00000003581;ENSBTAG00000004257;ENSBTAG00000004647;ENSBTAG00000007159;ENSBTAG00000008148;ENSBTAG00000009846;ENSBTAG00000011237;ENSBTAG00000011373;ENSBTAG00000011531;ENSBTAG00000012738;ENSBTAG00000014272;ENSBTAG00000014490;ENSBTAG00000015016;ENSBTAG00000020079;ENSBTAG00000020426;ENSBTAG00000031917;…	LGR4;ARID1B;SMAD1;SMARCA5;DCN;SETD7;TAF4B;UCP1;ESR1;GCM1;MTHFD1L;PKHD1;MAML3;SS18;ZNF827;MMUT;DDX39B;CALCOCO1;MAP3K4;TFAP2B;SCAF8;TRIM26;TRIM44;SMAD2;KCTD1
GO:0019438	aromatic compound biosynthetic process	25	3273	0.448677	0.651945	ENSBTAG00000002606;ENSBTAG00000002728;ENSBTAG00000002835;ENSBTAG00000003399;ENSBTAG00000003505;ENSBTAG00000003581;ENSBTAG00000004257;ENSBTAG00000004647;ENSBTAG00000007159;ENSBTAG00000008148;ENSBTAG00000009846;ENSBTAG00000011237;ENSBTAG00000011373;ENSBTAG00000011531;ENSBTAG00000012738;ENSBTAG00000014272;ENSBTAG00000014490;ENSBTAG00000015016;ENSBTAG00000020079;ENSBTAG00000020426;ENSBTAG00000031917;…	LGR4;ARID1B;SMAD1;SMARCA5;DCN;SETD7;TAF4B;UCP1;ESR1;GCM1;MTHFD1L;PKHD1;MAML3;SS18;ZNF827;MMUT;DDX39B;CALCOCO1;MAP3K4;TFAP2B;SCAF8;TRIM26;TRIM44;SMAD2;KCTD1
GO:1901362	organic cyclic compound biosynthetic process	25	3368	0.511814	0.684442	ENSBTAG00000002606;ENSBTAG00000002728;ENSBTAG00000002835;ENSBTAG00000003399;ENSBTAG00000003505;ENSBTAG00000003581;ENSBTAG00000004257;ENSBTAG00000004647;ENSBTAG00000007159;ENSBTAG00000008148;ENSBTAG00000009846;ENSBTAG00000011237;ENSBTAG00000011373;ENSBTAG00000011531;ENSBTAG00000012738;ENSBTAG00000014272;ENSBTAG00000014490;ENSBTAG00000015016;ENSBTAG00000020079;ENSBTAG00000020426;ENSBTAG00000031917;…	LGR4;ARID1B;SMAD1;SMARCA5;DCN;SETD7;TAF4B;UCP1;ESR1;GCM1;MTHFD1L;PKHD1;MAML3;SS18;ZNF827;MMUT;DDX39B;CALCOCO1;MAP3K4;TFAP2B;SCAF8;TRIM26;TRIM44;SMAD2;KCTD1
GO:0051252	regulation of RNA metabolic process	23	2983	0.434329	0.648207	ENSBTAG00000002606;ENSBTAG00000002728;ENSBTAG00000002835;ENSBTAG00000003399;ENSBTAG00000003505;ENSBTAG00000003581;ENSBTAG00000004257;ENSBTAG00000004647;ENSBTAG00000007159;ENSBTAG00000008148;ENSBTAG00000011237;ENSBTAG00000011373;ENSBTAG00000011531;ENSBTAG00000012738;ENSBTAG00000014490;ENSBTAG00000015016;ENSBTAG00000020426;ENSBTAG00000021029;ENSBTAG00000031917;ENSBTAG00000035744;ENSBTAG00000037389;…	LGR4;ARID1B;SMAD1;SMARCA5;DCN;SETD7;TAF4B;UCP1;ESR1;GCM1;PKHD1;MAML3;SS18;ZNF827;DDX39B;CALCOCO1;TFAP2B;PRR5L;SCAF8;TRIM26;TRIM44;SMAD2;KCTD1
GO:0006355	regulation of transcription, DNA-templated	22	2752	0.367196	0.612264	ENSBTAG00000002606;ENSBTAG00000002728;ENSBTAG00000002835;ENSBTAG00000003399;ENSBTAG00000003505;ENSBTAG00000003581;ENSBTAG00000004257;ENSBTAG00000004647;ENSBTAG00000007159;ENSBTAG00000008148;ENSBTAG00000011237;ENSBTAG00000011373;ENSBTAG00000011531;ENSBTAG00000012738;ENSBTAG00000014490;ENSBTAG00000015016;ENSBTAG00000020426;ENSBTAG00000031917;ENSBTAG00000035744;ENSBTAG00000037389;ENSBTAG00000039916;…	LGR4;ARID1B;SMAD1;SMARCA5;DCN;SETD7;TAF4B;UCP1;ESR1;GCM1;PKHD1;MAML3;SS18;ZNF827;DDX39B;CALCOCO1;TFAP2B;SCAF8;TRIM26;TRIM44;SMAD2;KCTD1
GO:1903506	regulation of nucleic acid-templated transcription	22	2754	0.368561	0.613128	ENSBTAG00000002606;ENSBTAG00000002728;ENSBTAG00000002835;ENSBTAG00000003399;ENSBTAG00000003505;ENSBTAG00000003581;ENSBTAG00000004257;ENSBTAG00000004647;ENSBTAG00000007159;ENSBTAG00000008148;ENSBTAG00000011237;ENSBTAG00000011373;ENSBTAG00000011531;ENSBTAG00000012738;ENSBTAG00000014490;ENSBTAG00000015016;ENSBTAG00000020426;ENSBTAG00000031917;ENSBTAG00000035744;ENSBTAG00000037389;ENSBTAG00000039916;…	LGR4;ARID1B;SMAD1;SMARCA5;DCN;SETD7;TAF4B;UCP1;ESR1;GCM1;PKHD1;MAML3;SS18;ZNF827;DDX39B;CALCOCO1;TFAP2B;SCAF8;TRIM26;TRIM44;SMAD2;KCTD1
GO:2001141	regulation of RNA biosynthetic process	22	2760	0.372664	0.613846	ENSBTAG00000002606;ENSBTAG00000002728;ENSBTAG00000002835;ENSBTAG00000003399;ENSBTAG00000003505;ENSBTAG00000003581;ENSBTAG00000004257;ENSBTAG00000004647;ENSBTAG00000007159;ENSBTAG00000008148;ENSBTAG00000011237;ENSBTAG00000011373;ENSBTAG00000011531;ENSBTAG00000012738;ENSBTAG00000014490;ENSBTAG00000015016;ENSBTAG00000020426;ENSBTAG00000031917;ENSBTAG00000035744;ENSBTAG00000037389;ENSBTAG00000039916;…	LGR4;ARID1B;SMAD1;SMARCA5;DCN;SETD7;TAF4B;UCP1;ESR1;GCM1;PKHD1;MAML3;SS18;ZNF827;DDX39B;CALCOCO1;TFAP2B;SCAF8;TRIM26;TRIM44;SMAD2;KCTD1
GO:0006351	transcription, DNA-templated	22	2875	0.452618	0.653781	ENSBTAG00000002606;ENSBTAG00000002728;ENSBTAG00000002835;ENSBTAG00000003399;ENSBTAG00000003505;ENSBTAG00000003581;ENSBTAG00000004257;ENSBTAG00000004647;ENSBTAG00000007159;ENSBTAG00000008148;ENSBTAG00000011237;ENSBTAG00000011373;ENSBTAG00000011531;ENSBTAG00000012738;ENSBTAG00000014490;ENSBTAG00000015016;ENSBTAG00000020426;ENSBTAG00000031917;ENSBTAG00000035744;ENSBTAG00000037389;ENSBTAG00000039916;…	LGR4;ARID1B;SMAD1;SMARCA5;DCN;SETD7;TAF4B;UCP1;ESR1;GCM1;PKHD1;MAML3;SS18;ZNF827;DDX39B;CALCOCO1;TFAP2B;SCAF8;TRIM26;TRIM44;SMAD2;KCTD1
GO:0097659	nucleic acid-templated transcription	22	2876	0.453319	0.653781	ENSBTAG00000002606;ENSBTAG00000002728;ENSBTAG00000002835;ENSBTAG00000003399;ENSBTAG00000003505;ENSBTAG00000003581;ENSBTAG00000004257;ENSBTAG00000004647;ENSBTAG00000007159;ENSBTAG00000008148;ENSBTAG00000011237;ENSBTAG00000011373;ENSBTAG00000011531;ENSBTAG00000012738;ENSBTAG00000014490;ENSBTAG00000015016;ENSBTAG00000020426;ENSBTAG00000031917;ENSBTAG00000035744;ENSBTAG00000037389;ENSBTAG00000039916;…	LGR4;ARID1B;SMAD1;SMARCA5;DCN;SETD7;TAF4B;UCP1;ESR1;GCM1;PKHD1;MAML3;SS18;ZNF827;DDX39B;CALCOCO1;TFAP2B;SCAF8;TRIM26;TRIM44;SMAD2;KCTD1
GO:0032774	RNA biosynthetic process	22	2888	0.461732	0.655758	ENSBTAG00000002606;ENSBTAG00000002728;ENSBTAG00000002835;ENSBTAG00000003399;ENSBTAG00000003505;ENSBTAG00000003581;ENSBTAG00000004257;ENSBTAG00000004647;ENSBTAG00000007159;ENSBTAG00000008148;ENSBTAG00000011237;ENSBTAG00000011373;ENSBTAG00000011531;ENSBTAG00000012738;ENSBTAG00000014490;ENSBTAG00000015016;ENSBTAG00000020426;ENSBTAG00000031917;ENSBTAG00000035744;ENSBTAG00000037389;ENSBTAG00000039916;…	LGR4;ARID1B;SMAD1;SMARCA5;DCN;SETD7;TAF4B;UCP1;ESR1;GCM1;PKHD1;MAML3;SS18;ZNF827;DDX39B;CALCOCO1;TFAP2B;SCAF8;TRIM26;TRIM44;SMAD2;KCTD1
GO:0034654	nucleobase-containing compound biosynthetic process	24	3199	0.489658	0.673066	ENSBTAG00000002606;ENSBTAG00000002728;ENSBTAG00000002835;ENSBTAG00000003399;ENSBTAG00000003505;ENSBTAG00000003581;ENSBTAG00000004257;ENSBTAG00000004647;ENSBTAG00000007159;ENSBTAG00000008148;ENSBTAG00000011237;ENSBTAG00000011373;ENSBTAG00000011531;ENSBTAG00000012738;ENSBTAG00000014272;ENSBTAG00000014490;ENSBTAG00000015016;ENSBTAG00000020079;ENSBTAG00000020426;ENSBTAG00000031917;ENSBTAG00000035744;…	LGR4;ARID1B;SMAD1;SMARCA5;DCN;SETD7;TAF4B;UCP1;ESR1;GCM1;PKHD1;MAML3;SS18;ZNF827;MMUT;DDX39B;CALCOCO1;MAP3K4;TFAP2B;SCAF8;TRIM26;TRIM44;SMAD2;KCTD1
GO:0090304	nucleic acid metabolic process	28	4169	0.738726	0.818233	ENSBTAG00000002606;ENSBTAG00000002728;ENSBTAG00000002835;ENSBTAG00000003399;ENSBTAG00000003505;ENSBTAG00000003581;ENSBTAG00000004257;ENSBTAG00000004647;ENSBTAG00000006468;ENSBTAG00000006960;ENSBTAG00000007159;ENSBTAG00000008148;ENSBTAG00000011237;ENSBTAG00000011373;ENSBTAG00000011531;ENSBTAG00000012738;ENSBTAG00000014060;ENSBTAG00000014490;ENSBTAG00000015016;ENSBTAG00000016589;ENSBTAG00000020079;…	LGR4;ARID1B;SMAD1;SMARCA5;DCN;SETD7;TAF4B;UCP1;PIWIL1;DHX16;ESR1;GCM1;PKHD1;MAML3;SS18;ZNF827;LSM6;DDX39B;CALCOCO1;PRPF40B;MAP3K4;TFAP2B;PRR5L;SCAF8;TRIM26;TRIM44;SMAD2;KCTD1
GO:0016070	RNA metabolic process	27	3736	0.572597	0.718777	ENSBTAG00000002606;ENSBTAG00000002728;ENSBTAG00000002835;ENSBTAG00000003399;ENSBTAG00000003505;ENSBTAG00000003581;ENSBTAG00000004257;ENSBTAG00000004647;ENSBTAG00000006468;ENSBTAG00000006960;ENSBTAG00000007159;ENSBTAG00000008148;ENSBTAG00000011237;ENSBTAG00000011373;ENSBTAG00000011531;ENSBTAG00000012738;ENSBTAG00000014060;ENSBTAG00000014490;ENSBTAG00000015016;ENSBTAG00000016589;ENSBTAG00000020426;…	LGR4;ARID1B;SMAD1;SMARCA5;DCN;SETD7;TAF4B;UCP1;PIWIL1;DHX16;ESR1;GCM1;PKHD1;MAML3;SS18;ZNF827;LSM6;DDX39B;CALCOCO1;PRPF40B;TFAP2B;PRR5L;SCAF8;TRIM26;TRIM44;SMAD2;KCTD1
GO:2000112	regulation of cellular macromolecule biosynthetic process	26	3127	0.272903	0.545576	ENSBTAG00000002606;ENSBTAG00000002728;ENSBTAG00000002835;ENSBTAG00000003399;ENSBTAG00000003505;ENSBTAG00000003581;ENSBTAG00000004257;ENSBTAG00000004647;ENSBTAG00000006468;ENSBTAG00000007159;ENSBTAG00000008148;ENSBTAG00000011237;ENSBTAG00000011373;ENSBTAG00000011531;ENSBTAG00000012738;ENSBTAG00000013224;ENSBTAG00000014490;ENSBTAG00000015016;ENSBTAG00000018200;ENSBTAG00000020079;ENSBTAG00000020426;…	LGR4;ARID1B;SMAD1;SMARCA5;DCN;SETD7;TAF4B;UCP1;PIWIL1;ESR1;GCM1;PKHD1;MAML3;SS18;ZNF827;RMND1;DDX39B;CALCOCO1;IL15;MAP3K4;TFAP2B;SCAF8;TRIM26;TRIM44;SMAD2;KCTD1
GO:0010556	regulation of macromolecule biosynthetic process	26	3150	0.286271	0.55803	ENSBTAG00000002606;ENSBTAG00000002728;ENSBTAG00000002835;ENSBTAG00000003399;ENSBTAG00000003505;ENSBTAG00000003581;ENSBTAG00000004257;ENSBTAG00000004647;ENSBTAG00000006468;ENSBTAG00000007159;ENSBTAG00000008148;ENSBTAG00000011237;ENSBTAG00000011373;ENSBTAG00000011531;ENSBTAG00000012738;ENSBTAG00000013224;ENSBTAG00000014490;ENSBTAG00000015016;ENSBTAG00000018200;ENSBTAG00000020079;ENSBTAG00000020426;…	LGR4;ARID1B;SMAD1;SMARCA5;DCN;SETD7;TAF4B;UCP1;PIWIL1;ESR1;GCM1;PKHD1;MAML3;SS18;ZNF827;RMND1;DDX39B;CALCOCO1;IL15;MAP3K4;TFAP2B;SCAF8;TRIM26;TRIM44;SMAD2;KCTD1
GO:0044271	cellular nitrogen compound biosynthetic process	29	3989	0.559406	0.712897	ENSBTAG00000002606;ENSBTAG00000002728;ENSBTAG00000002835;ENSBTAG00000003399;ENSBTAG00000003505;ENSBTAG00000003581;ENSBTAG00000004257;ENSBTAG00000004647;ENSBTAG00000006468;ENSBTAG00000006936;ENSBTAG00000007159;ENSBTAG00000008148;ENSBTAG00000009846;ENSBTAG00000011237;ENSBTAG00000011373;ENSBTAG00000011531;ENSBTAG00000012628;ENSBTAG00000012738;ENSBTAG00000013224;ENSBTAG00000014272;ENSBTAG00000014490;…	LGR4;ARID1B;SMAD1;SMARCA5;DCN;SETD7;TAF4B;UCP1;PIWIL1;MRPS18B;ESR1;GCM1;MTHFD1L;PKHD1;MAML3;SS18;SLC1A2;ZNF827;RMND1;MMUT;DDX39B;CALCOCO1;MAP3K4;TFAP2B;SCAF8;TRIM26;TRIM44;SMAD2;KCTD1
GO:0009059	macromolecule biosynthetic process	30	4094	0.539925	0.7022	ENSBTAG00000002606;ENSBTAG00000002728;ENSBTAG00000002835;ENSBTAG00000003399;ENSBTAG00000003505;ENSBTAG00000003581;ENSBTAG00000004257;ENSBTAG00000004647;ENSBTAG00000006468;ENSBTAG00000006936;ENSBTAG00000007159;ENSBTAG00000008148;ENSBTAG00000009023;ENSBTAG00000011237;ENSBTAG00000011373;ENSBTAG00000011531;ENSBTAG00000012738;ENSBTAG00000013224;ENSBTAG00000014490;ENSBTAG00000015016;ENSBTAG00000017391;…	LGR4;ARID1B;SMAD1;SMARCA5;DCN;SETD7;TAF4B;UCP1;PIWIL1;MRPS18B;ESR1;GCM1;TMTC3;PKHD1;MAML3;SS18;ZNF827;RMND1;DDX39B;CALCOCO1;HS3ST2;IL15;MAP3K4;TFAP2B;SCAF8;SLC10A7;TRIM26;TRIM44;SMAD2;KCTD1
GO:0034645	cellular macromolecule biosynthetic process	29	4065	0.605328	0.738943	ENSBTAG00000002606;ENSBTAG00000002728;ENSBTAG00000002835;ENSBTAG00000003399;ENSBTAG00000003505;ENSBTAG00000003581;ENSBTAG00000004257;ENSBTAG00000004647;ENSBTAG00000006468;ENSBTAG00000006936;ENSBTAG00000007159;ENSBTAG00000008148;ENSBTAG00000009023;ENSBTAG00000011237;ENSBTAG00000011373;ENSBTAG00000011531;ENSBTAG00000012738;ENSBTAG00000013224;ENSBTAG00000014490;ENSBTAG00000015016;ENSBTAG00000017391;…	LGR4;ARID1B;SMAD1;SMARCA5;DCN;SETD7;TAF4B;UCP1;PIWIL1;MRPS18B;ESR1;GCM1;TMTC3;PKHD1;MAML3;SS18;ZNF827;RMND1;DDX39B;CALCOCO1;HS3ST2;IL15;MAP3K4;TFAP2B;SCAF8;TRIM26;TRIM44;SMAD2;KCTD1
GO:0051254	positive regulation of RNA metabolic process	17	1405	0.0279879	0.334809	ENSBTAG00000002606;ENSBTAG00000002728;ENSBTAG00000002835;ENSBTAG00000003399;ENSBTAG00000003505;ENSBTAG00000004257;ENSBTAG00000007159;ENSBTAG00000008148;ENSBTAG00000011373;ENSBTAG00000011531;ENSBTAG00000014490;ENSBTAG00000015016;ENSBTAG00000020426;ENSBTAG00000021029;ENSBTAG00000031917;ENSBTAG00000037389;ENSBTAG00000039916	LGR4;ARID1B;SMAD1;SMARCA5;DCN;TAF4B;ESR1;GCM1;MAML3;SS18;DDX39B;CALCOCO1;TFAP2B;PRR5L;SCAF8;TRIM44;SMAD2
GO:0045893	positive regulation of transcription, DNA-templated	16	1305	0.0294195	0.334809	ENSBTAG00000002606;ENSBTAG00000002728;ENSBTAG00000002835;ENSBTAG00000003399;ENSBTAG00000003505;ENSBTAG00000004257;ENSBTAG00000007159;ENSBTAG00000008148;ENSBTAG00000011373;ENSBTAG00000011531;ENSBTAG00000014490;ENSBTAG00000015016;ENSBTAG00000020426;ENSBTAG00000031917;ENSBTAG00000037389;ENSBTAG00000039916	LGR4;ARID1B;SMAD1;SMARCA5;DCN;TAF4B;ESR1;GCM1;MAML3;SS18;DDX39B;CALCOCO1;TFAP2B;SCAF8;TRIM44;SMAD2
GO:1903508	positive regulation of nucleic acid-templated transcription	16	1305	0.0294195	0.334809	ENSBTAG00000002606;ENSBTAG00000002728;ENSBTAG00000002835;ENSBTAG00000003399;ENSBTAG00000003505;ENSBTAG00000004257;ENSBTAG00000007159;ENSBTAG00000008148;ENSBTAG00000011373;ENSBTAG00000011531;ENSBTAG00000014490;ENSBTAG00000015016;ENSBTAG00000020426;ENSBTAG00000031917;ENSBTAG00000037389;ENSBTAG00000039916	LGR4;ARID1B;SMAD1;SMARCA5;DCN;TAF4B;ESR1;GCM1;MAML3;SS18;DDX39B;CALCOCO1;TFAP2B;SCAF8;TRIM44;SMAD2
GO:1902680	positive regulation of RNA biosynthetic process	16	1310	0.0303331	0.340277	ENSBTAG00000002606;ENSBTAG00000002728;ENSBTAG00000002835;ENSBTAG00000003399;ENSBTAG00000003505;ENSBTAG00000004257;ENSBTAG00000007159;ENSBTAG00000008148;ENSBTAG00000011373;ENSBTAG00000011531;ENSBTAG00000014490;ENSBTAG00000015016;ENSBTAG00000020426;ENSBTAG00000031917;ENSBTAG00000037389;ENSBTAG00000039916	LGR4;ARID1B;SMAD1;SMARCA5;DCN;TAF4B;ESR1;GCM1;MAML3;SS18;DDX39B;CALCOCO1;TFAP2B;SCAF8;TRIM44;SMAD2
GO:0010557	positive regulation of macromolecule biosynthetic process	19	1476	0.0112635	0.320696	ENSBTAG00000002606;ENSBTAG00000002728;ENSBTAG00000002835;ENSBTAG00000003399;ENSBTAG00000003505;ENSBTAG00000004257;ENSBTAG00000007159;ENSBTAG00000008148;ENSBTAG00000011373;ENSBTAG00000011531;ENSBTAG00000013224;ENSBTAG00000014490;ENSBTAG00000015016;ENSBTAG00000018200;ENSBTAG00000020079;ENSBTAG00000020426;ENSBTAG00000031917;ENSBTAG00000037389;ENSBTAG00000039916	LGR4;ARID1B;SMAD1;SMARCA5;DCN;TAF4B;ESR1;GCM1;MAML3;SS18;RMND1;DDX39B;CALCOCO1;IL15;MAP3K4;TFAP2B;SCAF8;TRIM44;SMAD2
GO:0030282	bone mineralization	2	91	0.144099	0.456453	ENSBTAG00000002606;ENSBTAG00000009552	LGR4;ATP2B1
GO:0031214	biomineral tissue development	2	117	0.212223	0.512061	ENSBTAG00000002606;ENSBTAG00000009552	LGR4;ATP2B1
GO:0110148	biomineralization	2	123	0.228412	0.513438	ENSBTAG00000002606;ENSBTAG00000009552	LGR4;ATP2B1
GO:0001818	negative regulation of cytokine production	2	180	0.381868	0.618249	ENSBTAG00000002606;ENSBTAG00000009552	LGR4;ATP2B1
GO:0051241	negative regulation of multicellular organismal process	4	684	0.744923	0.822403	ENSBTAG00000002606;ENSBTAG00000003505;ENSBTAG00000009552;ENSBTAG00000018200	LGR4;DCN;ATP2B1;IL15
GO:0009967	positive regulation of signal transduction	12	1098	0.108419	0.422085	ENSBTAG00000002606;ENSBTAG00000003505;ENSBTAG00000005215;ENSBTAG00000007047;ENSBTAG00000013541;ENSBTAG00000014788;ENSBTAG00000017549;ENSBTAG00000020079;ENSBTAG00000021029;ENSBTAG00000021872;ENSBTAG00000037389;ENSBTAG00000039916	LGR4;DCN;IL10RA;FZD10;LMO3;AKAP12;KITLG;MAP3K4;PRR5L;RASGRP1;TRIM44;SMAD2
GO:0010647	positive regulation of cell communication	12	1213	0.179825	0.480233	ENSBTAG00000002606;ENSBTAG00000003505;ENSBTAG00000005215;ENSBTAG00000007047;ENSBTAG00000013541;ENSBTAG00000014788;ENSBTAG00000017549;ENSBTAG00000020079;ENSBTAG00000021029;ENSBTAG00000021872;ENSBTAG00000037389;ENSBTAG00000039916	LGR4;DCN;IL10RA;FZD10;LMO3;AKAP12;KITLG;MAP3K4;PRR5L;RASGRP1;TRIM44;SMAD2
GO:0023056	positive regulation of signaling	12	1219	0.184078	0.486829	ENSBTAG00000002606;ENSBTAG00000003505;ENSBTAG00000005215;ENSBTAG00000007047;ENSBTAG00000013541;ENSBTAG00000014788;ENSBTAG00000017549;ENSBTAG00000020079;ENSBTAG00000021029;ENSBTAG00000021872;ENSBTAG00000037389;ENSBTAG00000039916	LGR4;DCN;IL10RA;FZD10;LMO3;AKAP12;KITLG;MAP3K4;PRR5L;RASGRP1;TRIM44;SMAD2
GO:0009968	negative regulation of signal transduction	8	947	0.394108	0.628325	ENSBTAG00000002606;ENSBTAG00000003505;ENSBTAG00000005206;ENSBTAG00000007159;ENSBTAG00000011237;ENSBTAG00000013541;ENSBTAG00000014490;ENSBTAG00000016071	LGR4;DCN;TMEM14A;ESR1;PKHD1;LMO3;DDX39B;HHIP
GO:0010648	negative regulation of cell communication	8	1000	0.453929	0.653781	ENSBTAG00000002606;ENSBTAG00000003505;ENSBTAG00000005206;ENSBTAG00000007159;ENSBTAG00000011237;ENSBTAG00000013541;ENSBTAG00000014490;ENSBTAG00000016071	LGR4;DCN;TMEM14A;ESR1;PKHD1;LMO3;DDX39B;HHIP
GO:0023057	negative regulation of signaling	8	1005	0.459543	0.655758	ENSBTAG00000002606;ENSBTAG00000003505;ENSBTAG00000005206;ENSBTAG00000007159;ENSBTAG00000011237;ENSBTAG00000013541;ENSBTAG00000014490;ENSBTAG00000016071	LGR4;DCN;TMEM14A;ESR1;PKHD1;LMO3;DDX39B;HHIP
GO:0048585	negative regulation of response to stimulus	8	1212	0.673496	0.777262	ENSBTAG00000002606;ENSBTAG00000003505;ENSBTAG00000005206;ENSBTAG00000007159;ENSBTAG00000011237;ENSBTAG00000013541;ENSBTAG00000014490;ENSBTAG00000016071	LGR4;DCN;TMEM14A;ESR1;PKHD1;LMO3;DDX39B;HHIP
GO:0009966	regulation of signal transduction	19	2188	0.25094	0.53367	ENSBTAG00000002606;ENSBTAG00000003505;ENSBTAG00000005206;ENSBTAG00000005215;ENSBTAG00000007047;ENSBTAG00000007159;ENSBTAG00000009070;ENSBTAG00000011237;ENSBTAG00000013541;ENSBTAG00000014490;ENSBTAG00000014788;ENSBTAG00000016071;ENSBTAG00000017549;ENSBTAG00000020079;ENSBTAG00000020426;ENSBTAG00000021029;ENSBTAG00000021872;ENSBTAG00000037389;ENSBTAG00000039916	LGR4;DCN;TMEM14A;IL10RA;FZD10;ESR1;NPFFR2;PKHD1;LMO3;DDX39B;AKAP12;HHIP;KITLG;MAP3K4;TFAP2B;PRR5L;RASGRP1;TRIM44;SMAD2
GO:0010646	regulation of cell communication	19	2452	0.438025	0.648961	ENSBTAG00000002606;ENSBTAG00000003505;ENSBTAG00000005206;ENSBTAG00000005215;ENSBTAG00000007047;ENSBTAG00000007159;ENSBTAG00000009070;ENSBTAG00000011237;ENSBTAG00000013541;ENSBTAG00000014490;ENSBTAG00000014788;ENSBTAG00000016071;ENSBTAG00000017549;ENSBTAG00000020079;ENSBTAG00000020426;ENSBTAG00000021029;ENSBTAG00000021872;ENSBTAG00000037389;ENSBTAG00000039916	LGR4;DCN;TMEM14A;IL10RA;FZD10;ESR1;NPFFR2;PKHD1;LMO3;DDX39B;AKAP12;HHIP;KITLG;MAP3K4;TFAP2B;PRR5L;RASGRP1;TRIM44;SMAD2
GO:0023051	regulation of signaling	19	2464	0.446974	0.651069	ENSBTAG00000002606;ENSBTAG00000003505;ENSBTAG00000005206;ENSBTAG00000005215;ENSBTAG00000007047;ENSBTAG00000007159;ENSBTAG00000009070;ENSBTAG00000011237;ENSBTAG00000013541;ENSBTAG00000014490;ENSBTAG00000014788;ENSBTAG00000016071;ENSBTAG00000017549;ENSBTAG00000020079;ENSBTAG00000020426;ENSBTAG00000021029;ENSBTAG00000021872;ENSBTAG00000037389;ENSBTAG00000039916	LGR4;DCN;TMEM14A;IL10RA;FZD10;ESR1;NPFFR2;PKHD1;LMO3;DDX39B;AKAP12;HHIP;KITLG;MAP3K4;TFAP2B;PRR5L;RASGRP1;TRIM44;SMAD2
GO:0032835	glomerulus development	2	46	0.0448827	0.361352	ENSBTAG00000002606;ENSBTAG00000013674	LGR4;EDNRA
GO:0061005	cell differentiation involved in kidney development	2	47	0.0466574	0.361821	ENSBTAG00000002606;ENSBTAG00000013674	LGR4;EDNRA
GO:0048771	tissue remodeling	2	119	0.217607	0.513438	ENSBTAG00000002606;ENSBTAG00000013674	LGR4;EDNRA
GO:0072009	nephron epithelium development	3	97	0.0346049	0.348894	ENSBTAG00000002606;ENSBTAG00000013674;ENSBTAG00000020426	LGR4;EDNRA;TFAP2B
GO:0072006	nephron development	3	121	0.0596654	0.369698	ENSBTAG00000002606;ENSBTAG00000013674;ENSBTAG00000020426	LGR4;EDNRA;TFAP2B
GO:0048806	genitalia development	2	36	0.028641	0.334809	ENSBTAG00000002606;ENSBTAG00000007159	LGR4;ESR1
GO:0060688	regulation of morphogenesis of a branching structure	2	40	0.0347956	0.348894	ENSBTAG00000002606;ENSBTAG00000007159	LGR4;ESR1
GO:1905330	regulation of morphogenesis of an epithelium	2	49	0.0502826	0.361821	ENSBTAG00000002606;ENSBTAG00000007159	LGR4;ESR1
GO:0034121	regulation of toll-like receptor signaling pathway	2	53	0.0578238	0.364984	ENSBTAG00000002606;ENSBTAG00000007159	LGR4;ESR1
GO:0062207	regulation of pattern recognition receptor signaling pathway	2	76	0.107451	0.419708	ENSBTAG00000002606;ENSBTAG00000007159	LGR4;ESR1
GO:0002224	toll-like receptor signaling pathway	2	90	0.141579	0.456453	ENSBTAG00000002606;ENSBTAG00000007159	LGR4;ESR1
GO:0002221	pattern recognition receptor signaling pathway	2	130	0.247402	0.532364	ENSBTAG00000002606;ENSBTAG00000007159	LGR4;ESR1
GO:0061138	morphogenesis of a branching epithelium	6	161	0.0012115	0.320696	ENSBTAG00000002606;ENSBTAG00000007159;ENSBTAG00000008148;ENSBTAG00000011237;ENSBTAG00000013674;ENSBTAG00000016071	LGR4;ESR1;GCM1;PKHD1;EDNRA;HHIP
GO:0001763	morphogenesis of a branching structure	6	173	0.00174835	0.320696	ENSBTAG00000002606;ENSBTAG00000007159;ENSBTAG00000008148;ENSBTAG00000011237;ENSBTAG00000013674;ENSBTAG00000016071	LGR4;ESR1;GCM1;PKHD1;EDNRA;HHIP
GO:0046661	male sex differentiation	3	117	0.0550228	0.364984	ENSBTAG00000002606;ENSBTAG00000007159;ENSBTAG00000017549	LGR4;ESR1;KITLG
GO:0007548	sex differentiation	3	197	0.176551	0.480233	ENSBTAG00000002606;ENSBTAG00000007159;ENSBTAG00000017549	LGR4;ESR1;KITLG
GO:0048511	rhythmic process	3	182	0.149929	0.457321	ENSBTAG00000002606;ENSBTAG00000007159;ENSBTAG00000008733	LGR4;ESR1;MAGED1
GO:0050673	epithelial cell proliferation	4	328	0.221362	0.513438	ENSBTAG00000002606;ENSBTAG00000007159;ENSBTAG00000008733;ENSBTAG00000011237	LGR4;ESR1;MAGED1;PKHD1
GO:0060562	epithelial tube morphogenesis	6	267	0.0140101	0.320696	ENSBTAG00000002606;ENSBTAG00000007159;ENSBTAG00000009846;ENSBTAG00000011237;ENSBTAG00000013674;ENSBTAG00000016071	LGR4;ESR1;MTHFD1L;PKHD1;EDNRA;HHIP
GO:0009887	animal organ morphogenesis	9	785	0.123563	0.437164	ENSBTAG00000002606;ENSBTAG00000007159;ENSBTAG00000009846;ENSBTAG00000011237;ENSBTAG00000013674;ENSBTAG00000015119;ENSBTAG00000016071;ENSBTAG00000020426;ENSBTAG00000039916	LGR4;ESR1;MTHFD1L;PKHD1;EDNRA;SIK3;HHIP;TFAP2B;SMAD2
GO:0048754	branching morphogenesis of an epithelial tube	5	136	0.00329769	0.320696	ENSBTAG00000002606;ENSBTAG00000007159;ENSBTAG00000011237;ENSBTAG00000013674;ENSBTAG00000016071	LGR4;ESR1;PKHD1;EDNRA;HHIP
GO:0060070	canonical Wnt signaling pathway	3	242	0.26256	0.538677	ENSBTAG00000002606;ENSBTAG00000007047;ENSBTAG00000013674	LGR4;FZD10;EDNRA
GO:0016055	Wnt signaling pathway	3	333	0.443609	0.650369	ENSBTAG00000002606;ENSBTAG00000007047;ENSBTAG00000013674	LGR4;FZD10;EDNRA
GO:0198738	cell-cell signaling by wnt	3	336	0.44939	0.65258	ENSBTAG00000002606;ENSBTAG00000007047;ENSBTAG00000013674	LGR4;FZD10;EDNRA
GO:1905114	cell surface receptor signaling pathway involved in cell-cell signaling	3	404	0.572708	0.718777	ENSBTAG00000002606;ENSBTAG00000007047;ENSBTAG00000013674	LGR4;FZD10;EDNRA
GO:0002764	immune response-regulating signaling pathway	4	300	0.179217	0.480233	ENSBTAG00000002606;ENSBTAG00000004982;ENSBTAG00000007159;ENSBTAG00000048304	LGR4;GPLD1;ESR1;ENSBTAG00000048304
GO:0120163	negative regulation of cold-induced thermogenesis	2	32	0.0229809	0.334809	ENSBTAG00000002606;ENSBTAG00000018200	LGR4;IL15
GO:0048872	homeostasis of number of cells	2	230	0.505541	0.682135	ENSBTAG00000002606;ENSBTAG00000017549	LGR4;KITLG
GO:0032922	circadian regulation of gene expression	2	53	0.0578238	0.364984	ENSBTAG00000002606;ENSBTAG00000008733	LGR4;MAGED1
GO:0007623	circadian rhythm	2	135	0.261004	0.537786	ENSBTAG00000002606;ENSBTAG00000008733	LGR4;MAGED1
GO:0007186	G protein-coupled receptor signaling pathway	12	1741	0.635445	0.760413	ENSBTAG00000002606;ENSBTAG00000009070;ENSBTAG00000013674;ENSBTAG00000013848;ENSBTAG00000014788;ENSBTAG00000021343;ENSBTAG00000046378;ENSBTAG00000051946;ENSBTAG00000052183;ENSBTAG00000052809;ENSBTAG00000053275;ENSBTAG00000055037	LGR4;NPFFR2;EDNRA;ADGRD1;AKAP12;ARHGEF12;OR52A5EP;ENSBTAG00000051946;OR52S6;OR52A1E;OR9G1;OR7A85
GO:0007283	spermatogenesis	4	330	0.224471	0.513438	ENSBTAG00000002606;ENSBTAG00000005627;ENSBTAG00000006468;ENSBTAG00000018085	LGR4;PAFAH1B2;PIWIL1;GTSF1
GO:0048232	male gamete generation	4	346	0.249739	0.532406	ENSBTAG00000002606;ENSBTAG00000005627;ENSBTAG00000006468;ENSBTAG00000018085	LGR4;PAFAH1B2;PIWIL1;GTSF1
GO:2000027	regulation of animal organ morphogenesis	2	89	0.139068	0.454661	ENSBTAG00000002606;ENSBTAG00000011237	LGR4;PKHD1
GO:0001649	osteoblast differentiation	2	149	0.299077	0.560947	ENSBTAG00000002606;ENSBTAG00000002835	LGR4;SMAD1
GO:0001503	ossification	4	283	0.155124	0.463933	ENSBTAG00000002606;ENSBTAG00000002835;ENSBTAG00000009552;ENSBTAG00000015119	LGR4;SMAD1;ATP2B1;SIK3
GO:0050793	regulation of developmental process	15	1795	0.338102	0.58983	ENSBTAG00000002606;ENSBTAG00000002835;ENSBTAG00000003505;ENSBTAG00000007159;ENSBTAG00000008148;ENSBTAG00000009552;ENSBTAG00000011237;ENSBTAG00000011914;ENSBTAG00000013541;ENSBTAG00000016549;ENSBTAG00000017549;ENSBTAG00000018200;ENSBTAG00000020426;ENSBTAG00000021872;ENSBTAG00000039916	LGR4;SMAD1;DCN;ESR1;GCM1;ATP2B1;PKHD1;RASSF10;LMO3;CARMIL1;KITLG;IL15;TFAP2B;RASGRP1;SMAD2
GO:0022603	regulation of anatomical structure morphogenesis	6	626	0.312052	0.572484	ENSBTAG00000002606;ENSBTAG00000002835;ENSBTAG00000003505;ENSBTAG00000007159;ENSBTAG00000011237;ENSBTAG00000016549	LGR4;SMAD1;DCN;ESR1;PKHD1;CARMIL1
GO:0051094	positive regulation of developmental process	12	932	0.0412579	0.3507	ENSBTAG00000002606;ENSBTAG00000002835;ENSBTAG00000003505;ENSBTAG00000008148;ENSBTAG00000009552;ENSBTAG00000011914;ENSBTAG00000013541;ENSBTAG00000016549;ENSBTAG00000017549;ENSBTAG00000018200;ENSBTAG00000021872;ENSBTAG00000039916	LGR4;SMAD1;DCN;GCM1;ATP2B1;RASSF10;LMO3;CARMIL1;KITLG;IL15;RASGRP1;SMAD2
GO:0035239	tube morphogenesis	11	637	0.00725741	0.320696	ENSBTAG00000002606;ENSBTAG00000002835;ENSBTAG00000003505;ENSBTAG00000004982;ENSBTAG00000007159;ENSBTAG00000009846;ENSBTAG00000011237;ENSBTAG00000013674;ENSBTAG00000016071;ENSBTAG00000020426;ENSBTAG00000039916	LGR4;SMAD1;DCN;GPLD1;ESR1;MTHFD1L;PKHD1;EDNRA;HHIP;TFAP2B;SMAD2
GO:0035295	tube development	11	794	0.0318806	0.345405	ENSBTAG00000002606;ENSBTAG00000002835;ENSBTAG00000003505;ENSBTAG00000004982;ENSBTAG00000007159;ENSBTAG00000009846;ENSBTAG00000011237;ENSBTAG00000013674;ENSBTAG00000016071;ENSBTAG00000020426;ENSBTAG00000039916	LGR4;SMAD1;DCN;GPLD1;ESR1;MTHFD1L;PKHD1;EDNRA;HHIP;TFAP2B;SMAD2
GO:0072073	kidney epithelium development	5	120	0.00191575	0.320696	ENSBTAG00000002606;ENSBTAG00000002835;ENSBTAG00000013674;ENSBTAG00000020426;ENSBTAG00000039916	LGR4;SMAD1;EDNRA;TFAP2B;SMAD2
GO:0001655	urogenital system development	7	258	0.00296375	0.320696	ENSBTAG00000002606;ENSBTAG00000002835;ENSBTAG00000007159;ENSBTAG00000011237;ENSBTAG00000013674;ENSBTAG00000020426;ENSBTAG00000039916	LGR4;SMAD1;ESR1;PKHD1;EDNRA;TFAP2B;SMAD2
GO:0007276	gamete generation	6	459	0.122197	0.437164	ENSBTAG00000002606;ENSBTAG00000002835;ENSBTAG00000005627;ENSBTAG00000006468;ENSBTAG00000013674;ENSBTAG00000018085	LGR4;SMAD1;PAFAH1B2;PIWIL1;EDNRA;GTSF1
GO:0019953	sexual reproduction	6	567	0.238054	0.523577	ENSBTAG00000002606;ENSBTAG00000002835;ENSBTAG00000005627;ENSBTAG00000006468;ENSBTAG00000013674;ENSBTAG00000018085	LGR4;SMAD1;PAFAH1B2;PIWIL1;EDNRA;GTSF1
GO:0048609	multicellular organismal reproductive process	7	521	0.0893347	0.400616	ENSBTAG00000002606;ENSBTAG00000002835;ENSBTAG00000005627;ENSBTAG00000006468;ENSBTAG00000007159;ENSBTAG00000013674;ENSBTAG00000018085	LGR4;SMAD1;PAFAH1B2;PIWIL1;ESR1;EDNRA;GTSF1
GO:0032504	multicellular organism reproduction	7	534	0.0985233	0.40628	ENSBTAG00000002606;ENSBTAG00000002835;ENSBTAG00000005627;ENSBTAG00000006468;ENSBTAG00000007159;ENSBTAG00000013674;ENSBTAG00000018085	LGR4;SMAD1;PAFAH1B2;PIWIL1;ESR1;EDNRA;GTSF1
GO:0044703	multi-organism reproductive process	7	632	0.183218	0.486185	ENSBTAG00000002606;ENSBTAG00000002835;ENSBTAG00000005627;ENSBTAG00000006468;ENSBTAG00000007159;ENSBTAG00000013674;ENSBTAG00000018085	LGR4;SMAD1;PAFAH1B2;PIWIL1;ESR1;EDNRA;GTSF1
GO:0051704	multi-organism process	7	648	0.199354	0.501456	ENSBTAG00000002606;ENSBTAG00000002835;ENSBTAG00000005627;ENSBTAG00000006468;ENSBTAG00000007159;ENSBTAG00000013674;ENSBTAG00000018085	LGR4;SMAD1;PAFAH1B2;PIWIL1;ESR1;EDNRA;GTSF1
GO:0001822	kidney development	6	223	0.00608894	0.320696	ENSBTAG00000002606;ENSBTAG00000002835;ENSBTAG00000011237;ENSBTAG00000013674;ENSBTAG00000020426;ENSBTAG00000039916	LGR4;SMAD1;PKHD1;EDNRA;TFAP2B;SMAD2
GO:0072001	renal system development	6	233	0.00749139	0.320696	ENSBTAG00000002606;ENSBTAG00000002835;ENSBTAG00000011237;ENSBTAG00000013674;ENSBTAG00000020426;ENSBTAG00000039916	LGR4;SMAD1;PKHD1;EDNRA;TFAP2B;SMAD2
GO:0001657	ureteric bud development	3	82	0.0224833	0.334809	ENSBTAG00000002606;ENSBTAG00000002835;ENSBTAG00000039916	LGR4;SMAD1;SMAD2
GO:0072163	mesonephric epithelium development	3	82	0.0224833	0.334809	ENSBTAG00000002606;ENSBTAG00000002835;ENSBTAG00000039916	LGR4;SMAD1;SMAD2
GO:0072164	mesonephric tubule development	3	82	0.0224833	0.334809	ENSBTAG00000002606;ENSBTAG00000002835;ENSBTAG00000039916	LGR4;SMAD1;SMAD2
GO:0001823	mesonephros development	3	86	0.0254423	0.334809	ENSBTAG00000002606;ENSBTAG00000002835;ENSBTAG00000039916	LGR4;SMAD1;SMAD2
GO:0048565	digestive tract development	2	99	0.164582	0.473923	ENSBTAG00000002606;ENSBTAG00000039916	LGR4;SMAD2
GO:0055123	digestive system development	2	104	0.177632	0.480233	ENSBTAG00000002606;ENSBTAG00000039916	LGR4;SMAD2
GO:0051172	negative regulation of nitrogen compound metabolic process	11	1791	0.776548	0.845099	ENSBTAG00000002606;ENSBTAG00000003399;ENSBTAG00000007159;ENSBTAG00000009150;ENSBTAG00000012738;ENSBTAG00000020426;ENSBTAG00000021029;ENSBTAG00000031917;ENSBTAG00000037389;ENSBTAG00000039916;ENSBTAG00000050380	LGR4;SMARCA5;ESR1;SPON1;ZNF827;TFAP2B;PRR5L;SCAF8;TRIM44;SMAD2;KCTD1
GO:0045892	negative regulation of transcription, DNA-templated	8	991	0.443803	0.650369	ENSBTAG00000002606;ENSBTAG00000003399;ENSBTAG00000007159;ENSBTAG00000012738;ENSBTAG00000020426;ENSBTAG00000031917;ENSBTAG00000039916;ENSBTAG00000050380	LGR4;SMARCA5;ESR1;ZNF827;TFAP2B;SCAF8;SMAD2;KCTD1
GO:1902679	negative regulation of RNA biosynthetic process	8	992	0.44493	0.650369	ENSBTAG00000002606;ENSBTAG00000003399;ENSBTAG00000007159;ENSBTAG00000012738;ENSBTAG00000020426;ENSBTAG00000031917;ENSBTAG00000039916;ENSBTAG00000050380	LGR4;SMARCA5;ESR1;ZNF827;TFAP2B;SCAF8;SMAD2;KCTD1
GO:1903507	negative regulation of nucleic acid-templated transcription	8	992	0.44493	0.650369	ENSBTAG00000002606;ENSBTAG00000003399;ENSBTAG00000007159;ENSBTAG00000012738;ENSBTAG00000020426;ENSBTAG00000031917;ENSBTAG00000039916;ENSBTAG00000050380	LGR4;SMARCA5;ESR1;ZNF827;TFAP2B;SCAF8;SMAD2;KCTD1
GO:0051253	negative regulation of RNA metabolic process	8	1073	0.534537	0.699033	ENSBTAG00000002606;ENSBTAG00000003399;ENSBTAG00000007159;ENSBTAG00000012738;ENSBTAG00000020426;ENSBTAG00000031917;ENSBTAG00000039916;ENSBTAG00000050380	LGR4;SMARCA5;ESR1;ZNF827;TFAP2B;SCAF8;SMAD2;KCTD1
GO:2000113	negative regulation of cellular macromolecule biosynthetic process	8	1150	0.614503	0.747445	ENSBTAG00000002606;ENSBTAG00000003399;ENSBTAG00000007159;ENSBTAG00000012738;ENSBTAG00000020426;ENSBTAG00000031917;ENSBTAG00000039916;ENSBTAG00000050380	LGR4;SMARCA5;ESR1;ZNF827;TFAP2B;SCAF8;SMAD2;KCTD1
GO:0010558	negative regulation of macromolecule biosynthetic process	8	1156	0.620441	0.75102	ENSBTAG00000002606;ENSBTAG00000003399;ENSBTAG00000007159;ENSBTAG00000012738;ENSBTAG00000020426;ENSBTAG00000031917;ENSBTAG00000039916;ENSBTAG00000050380	LGR4;SMARCA5;ESR1;ZNF827;TFAP2B;SCAF8;SMAD2;KCTD1
GO:0045934	negative regulation of nucleobase-containing compound metabolic process	8	1158	0.622411	0.752808	ENSBTAG00000002606;ENSBTAG00000003399;ENSBTAG00000007159;ENSBTAG00000012738;ENSBTAG00000020426;ENSBTAG00000031917;ENSBTAG00000039916;ENSBTAG00000050380	LGR4;SMARCA5;ESR1;ZNF827;TFAP2B;SCAF8;SMAD2;KCTD1
GO:0031327	negative regulation of cellular biosynthetic process	8	1194	0.656927	0.771146	ENSBTAG00000002606;ENSBTAG00000003399;ENSBTAG00000007159;ENSBTAG00000012738;ENSBTAG00000020426;ENSBTAG00000031917;ENSBTAG00000039916;ENSBTAG00000050380	LGR4;SMARCA5;ESR1;ZNF827;TFAP2B;SCAF8;SMAD2;KCTD1
GO:0009890	negative regulation of biosynthetic process	8	1211	0.672588	0.777084	ENSBTAG00000002606;ENSBTAG00000003399;ENSBTAG00000007159;ENSBTAG00000012738;ENSBTAG00000020426;ENSBTAG00000031917;ENSBTAG00000039916;ENSBTAG00000050380	LGR4;SMARCA5;ESR1;ZNF827;TFAP2B;SCAF8;SMAD2;KCTD1
GO:0031324	negative regulation of cellular metabolic process	12	1905	0.754949	0.830374	ENSBTAG00000002606;ENSBTAG00000003399;ENSBTAG00000005215;ENSBTAG00000007159;ENSBTAG00000009150;ENSBTAG00000012738;ENSBTAG00000020426;ENSBTAG00000021029;ENSBTAG00000031917;ENSBTAG00000037389;ENSBTAG00000039916;ENSBTAG00000050380	LGR4;SMARCA5;IL10RA;ESR1;SPON1;ZNF827;TFAP2B;PRR5L;SCAF8;TRIM44;SMAD2;KCTD1
GO:0009892	negative regulation of metabolic process	15	2264	0.705113	0.797007	ENSBTAG00000002606;ENSBTAG00000003399;ENSBTAG00000005215;ENSBTAG00000006468;ENSBTAG00000007159;ENSBTAG00000009150;ENSBTAG00000009552;ENSBTAG00000012738;ENSBTAG00000018200;ENSBTAG00000020426;ENSBTAG00000021029;ENSBTAG00000031917;ENSBTAG00000037389;ENSBTAG00000039916;ENSBTAG00000050380	LGR4;SMARCA5;IL10RA;PIWIL1;ESR1;SPON1;ATP2B1;ZNF827;IL15;TFAP2B;PRR5L;SCAF8;TRIM44;SMAD2;KCTD1
GO:0010629	negative regulation of gene expression	7	716	0.27343	0.545707	ENSBTAG00000002606;ENSBTAG00000003399;ENSBTAG00000006468;ENSBTAG00000007159;ENSBTAG00000009552;ENSBTAG00000021029;ENSBTAG00000039916	LGR4;SMARCA5;PIWIL1;ESR1;ATP2B1;PRR5L;SMAD2
GO:0010605	negative regulation of macromolecule metabolic process	13	2118	0.793908	0.856184	ENSBTAG00000002606;ENSBTAG00000003399;ENSBTAG00000006468;ENSBTAG00000007159;ENSBTAG00000009150;ENSBTAG00000009552;ENSBTAG00000012738;ENSBTAG00000020426;ENSBTAG00000021029;ENSBTAG00000031917;ENSBTAG00000037389;ENSBTAG00000039916;ENSBTAG00000050380	LGR4;SMARCA5;PIWIL1;ESR1;SPON1;ATP2B1;ZNF827;TFAP2B;PRR5L;SCAF8;TRIM44;SMAD2;KCTD1
GO:0072210	metanephric nephron development	2	31	0.0216471	0.334809	ENSBTAG00000002606;ENSBTAG00000020426	LGR4;TFAP2B
GO:0001656	metanephros development	2	71	0.0958829	0.405515	ENSBTAG00000002606;ENSBTAG00000020426	LGR4;TFAP2B
GO:0072080	nephron tubule development	2	82	0.121791	0.437164	ENSBTAG00000002606;ENSBTAG00000020426	LGR4;TFAP2B
GO:0061326	renal tubule development	2	86	0.131598	0.446904	ENSBTAG00000002606;ENSBTAG00000020426	LGR4;TFAP2B
GO:0106106	cold-induced thermogenesis	3	94	0.0319576	0.345405	ENSBTAG00000002606;ENSBTAG00000004647;ENSBTAG00000018200	LGR4;UCP1;IL15
GO:0120161	regulation of cold-induced thermogenesis	3	94	0.0319576	0.345405	ENSBTAG00000002606;ENSBTAG00000004647;ENSBTAG00000018200	LGR4;UCP1;IL15
GO:1990845	adaptive thermogenesis	3	100	0.0373624	0.3507	ENSBTAG00000002606;ENSBTAG00000004647;ENSBTAG00000018200	LGR4;UCP1;IL15
GO:0001659	temperature homeostasis	4	114	0.00994116	0.320696	ENSBTAG00000002606;ENSBTAG00000004647;ENSBTAG00000013551;ENSBTAG00000018200	LGR4;UCP1;NOX3;IL15
GO:1903361	protein localization to basolateral plasma membrane	1	1	0.00734301	0.320696	ENSBTAG00000001460	LIN7C
GO:0035090	maintenance of apical/basal cell polarity	1	6	0.0432634	0.3507	ENSBTAG00000001460	LIN7C
GO:0045199	maintenance of epithelial cell apical/basal polarity	1	6	0.0432634	0.3507	ENSBTAG00000001460	LIN7C
GO:0030011	maintenance of cell polarity	1	11	0.0778939	0.388915	ENSBTAG00000001460	LIN7C
GO:0045197	establishment or maintenance of epithelial cell apical/basal polarity	1	36	0.233252	0.519205	ENSBTAG00000001460	LIN7C
GO:0035088	establishment or maintenance of apical/basal cell polarity	1	39	0.250056	0.532406	ENSBTAG00000001460	LIN7C
GO:0061245	establishment or maintenance of bipolar cell polarity	1	39	0.250056	0.532406	ENSBTAG00000001460	LIN7C
GO:0002011	morphogenesis of an epithelial sheet	1	43	0.271893	0.544016	ENSBTAG00000001460	LIN7C
GO:0007269	neurotransmitter secretion	1	94	0.500774	0.678495	ENSBTAG00000001460	LIN7C
GO:0099643	signal release from synapse	1	94	0.500774	0.678495	ENSBTAG00000001460	LIN7C
GO:0007268	chemical synaptic transmission	2	448	0.844882	0.891988	ENSBTAG00000001460;ENSBTAG00000014788	LIN7C;AKAP12
GO:0098916	anterograde trans-synaptic signaling	2	448	0.844882	0.891988	ENSBTAG00000001460;ENSBTAG00000014788	LIN7C;AKAP12
GO:0099537	trans-synaptic signaling	2	454	0.850194	0.895619	ENSBTAG00000001460;ENSBTAG00000014788	LIN7C;AKAP12
GO:0099536	synaptic signaling	2	473	0.86595	0.906281	ENSBTAG00000001460;ENSBTAG00000014788	LIN7C;AKAP12
GO:0051649	establishment of localization in cell	10	1609	0.754795	0.830374	ENSBTAG00000001460;ENSBTAG00000006398;ENSBTAG00000006556;ENSBTAG00000009112;ENSBTAG00000011237;ENSBTAG00000012628;ENSBTAG00000014490;ENSBTAG00000018180;ENSBTAG00000021029;ENSBTAG00000021872	LIN7C;ENSBTAG00000006398;COPB1;TRAM2;PKHD1;SLC1A2;DDX39B;C5H12orf50;PRR5L;RASGRP1
GO:1990778	protein localization to cell periphery	2	249	0.548244	0.707961	ENSBTAG00000001460;ENSBTAG00000001517	LIN7C;KRT18
GO:0016192	vesicle-mediated transport	10	1169	0.355693	0.602059	ENSBTAG00000001460;ENSBTAG00000001517;ENSBTAG00000005215;ENSBTAG00000006556;ENSBTAG00000007450;ENSBTAG00000016549;ENSBTAG00000018200;ENSBTAG00000021872;ENSBTAG00000034522;ENSBTAG00000044158	LIN7C;KRT18;IL10RA;COPB1;C2;CARMIL1;IL15;RASGRP1;SLC10A7;LDLRAD3
GO:0051641	cellular localization	16	2203	0.559185	0.712897	ENSBTAG00000001460;ENSBTAG00000001517;ENSBTAG00000005215;ENSBTAG00000006398;ENSBTAG00000006556;ENSBTAG00000007159;ENSBTAG00000009112;ENSBTAG00000011237;ENSBTAG00000012628;ENSBTAG00000012738;ENSBTAG00000013674;ENSBTAG00000014490;ENSBTAG00000018180;ENSBTAG00000021029;ENSBTAG00000021872;ENSBTAG00000038430	LIN7C;KRT18;IL10RA;ENSBTAG00000006398;COPB1;ESR1;TRAM2;PKHD1;SLC1A2;ZNF827;EDNRA;DDX39B;C5H12orf50;PRR5L;RASGRP1;ENSBTAG00000038430
GO:0034613	cellular protein localization	10	1246	0.433003	0.647797	ENSBTAG00000001460;ENSBTAG00000001517;ENSBTAG00000005215;ENSBTAG00000006398;ENSBTAG00000006556;ENSBTAG00000007159;ENSBTAG00000009112;ENSBTAG00000012738;ENSBTAG00000013674;ENSBTAG00000021029	LIN7C;KRT18;IL10RA;ENSBTAG00000006398;COPB1;ESR1;TRAM2;ZNF827;EDNRA;PRR5L
GO:0070727	cellular macromolecule localization	10	1253	0.440057	0.650369	ENSBTAG00000001460;ENSBTAG00000001517;ENSBTAG00000005215;ENSBTAG00000006398;ENSBTAG00000006556;ENSBTAG00000007159;ENSBTAG00000009112;ENSBTAG00000012738;ENSBTAG00000013674;ENSBTAG00000021029	LIN7C;KRT18;IL10RA;ENSBTAG00000006398;COPB1;ESR1;TRAM2;ZNF827;EDNRA;PRR5L
GO:0008104	protein localization	14	1738	0.399128	0.628325	ENSBTAG00000001460;ENSBTAG00000001517;ENSBTAG00000005215;ENSBTAG00000006398;ENSBTAG00000006556;ENSBTAG00000007159;ENSBTAG00000009112;ENSBTAG00000012738;ENSBTAG00000013674;ENSBTAG00000015119;ENSBTAG00000020426;ENSBTAG00000021029;ENSBTAG00000034522;ENSBTAG00000039916	LIN7C;KRT18;IL10RA;ENSBTAG00000006398;COPB1;ESR1;TRAM2;ZNF827;EDNRA;SIK3;TFAP2B;PRR5L;SLC10A7;SMAD2
GO:0015031	protein transport	11	965	0.0976692	0.405515	ENSBTAG00000001460;ENSBTAG00000001517;ENSBTAG00000005215;ENSBTAG00000006398;ENSBTAG00000006556;ENSBTAG00000009112;ENSBTAG00000013674;ENSBTAG00000020426;ENSBTAG00000021029;ENSBTAG00000034522;ENSBTAG00000039916	LIN7C;KRT18;IL10RA;ENSBTAG00000006398;COPB1;TRAM2;EDNRA;TFAP2B;PRR5L;SLC10A7;SMAD2
GO:0045184	establishment of protein localization	12	1058	0.0883538	0.400616	ENSBTAG00000001460;ENSBTAG00000001517;ENSBTAG00000005215;ENSBTAG00000006398;ENSBTAG00000006556;ENSBTAG00000009112;ENSBTAG00000012738;ENSBTAG00000013674;ENSBTAG00000020426;ENSBTAG00000021029;ENSBTAG00000034522;ENSBTAG00000039916	LIN7C;KRT18;IL10RA;ENSBTAG00000006398;COPB1;TRAM2;ZNF827;EDNRA;TFAP2B;PRR5L;SLC10A7;SMAD2
GO:0033036	macromolecule localization	18	2102	0.278811	0.54979	ENSBTAG00000001460;ENSBTAG00000001517;ENSBTAG00000005215;ENSBTAG00000005479;ENSBTAG00000006398;ENSBTAG00000006556;ENSBTAG00000006896;ENSBTAG00000007159;ENSBTAG00000009112;ENSBTAG00000012738;ENSBTAG00000013674;ENSBTAG00000014490;ENSBTAG00000015119;ENSBTAG00000018180;ENSBTAG00000020426;ENSBTAG00000021029;ENSBTAG00000034522;ENSBTAG00000039916	LIN7C;KRT18;IL10RA;LIPC;ENSBTAG00000006398;COPB1;ABCA9;ESR1;TRAM2;ZNF827;EDNRA;DDX39B;SIK3;C5H12orf50;TFAP2B;PRR5L;SLC10A7;SMAD2
GO:0071705	nitrogen compound transport	15	1330	0.0630925	0.369698	ENSBTAG00000001460;ENSBTAG00000001517;ENSBTAG00000002099;ENSBTAG00000005215;ENSBTAG00000006398;ENSBTAG00000006556;ENSBTAG00000009112;ENSBTAG00000012628;ENSBTAG00000013674;ENSBTAG00000014490;ENSBTAG00000018180;ENSBTAG00000020426;ENSBTAG00000021029;ENSBTAG00000034522;ENSBTAG00000039916	LIN7C;KRT18;SLC14A2;IL10RA;ENSBTAG00000006398;COPB1;TRAM2;SLC1A2;EDNRA;DDX39B;C5H12orf50;TFAP2B;PRR5L;SLC10A7;SMAD2
GO:0051179	localization	41	5069	0.257511	0.537786	ENSBTAG00000001460;ENSBTAG00000001517;ENSBTAG00000002099;ENSBTAG00000002348;ENSBTAG00000003505;ENSBTAG00000004647;ENSBTAG00000004979;ENSBTAG00000004982;ENSBTAG00000005206;ENSBTAG00000005215;ENSBTAG00000005479;ENSBTAG00000006398;ENSBTAG00000006556;ENSBTAG00000006896;ENSBTAG00000006937;ENSBTAG00000007159;ENSBTAG00000007450;ENSBTAG00000009112;ENSBTAG00000009552;ENSBTAG00000011237;ENSBTAG00000012628;…	LIN7C;KRT18;SLC14A2;SLC4A4;DCN;UCP1;MRS2;GPLD1;TMEM14A;IL10RA;LIPC;ENSBTAG00000006398;COPB1;ABCA9;ABCA10;ESR1;C2;TRAM2;ATP2B1;PKHD1;SLC1A2;ZNF827;EDNRA;GC;DDX39B;SIK3;CARMIL1;GRIK4;KITLG;C5H12orf50;IL15;TFAP2B;PRR5L;RASGRP1;SLC10A7;SLC17A4;SLC17A1;ENSBTAG00000038430;SMAD2;LDLRAD3;ENSBTAG00000049286
GO:0071702	organic substance transport	20	1679	0.0203993	0.334809	ENSBTAG00000001460;ENSBTAG00000001517;ENSBTAG00000002099;ENSBTAG00000002348;ENSBTAG00000005215;ENSBTAG00000005479;ENSBTAG00000006398;ENSBTAG00000006556;ENSBTAG00000006896;ENSBTAG00000009112;ENSBTAG00000012628;ENSBTAG00000013674;ENSBTAG00000014490;ENSBTAG00000018180;ENSBTAG00000020426;ENSBTAG00000021029;ENSBTAG00000034522;ENSBTAG00000037738;ENSBTAG00000037917;ENSBTAG00000039916	LIN7C;KRT18;SLC14A2;SLC4A4;IL10RA;LIPC;ENSBTAG00000006398;COPB1;ABCA9;TRAM2;SLC1A2;EDNRA;DDX39B;C5H12orf50;TFAP2B;PRR5L;SLC10A7;SLC17A4;SLC17A1;SMAD2
GO:0051234	establishment of localization	36	3720	0.0408446	0.3507	ENSBTAG00000001460;ENSBTAG00000001517;ENSBTAG00000002099;ENSBTAG00000002348;ENSBTAG00000004647;ENSBTAG00000004979;ENSBTAG00000005206;ENSBTAG00000005215;ENSBTAG00000005479;ENSBTAG00000006398;ENSBTAG00000006556;ENSBTAG00000006896;ENSBTAG00000006937;ENSBTAG00000007450;ENSBTAG00000009112;ENSBTAG00000009552;ENSBTAG00000011237;ENSBTAG00000012628;ENSBTAG00000012738;ENSBTAG00000013674;ENSBTAG00000013718;…	LIN7C;KRT18;SLC14A2;SLC4A4;UCP1;MRS2;TMEM14A;IL10RA;LIPC;ENSBTAG00000006398;COPB1;ABCA9;ABCA10;C2;TRAM2;ATP2B1;PKHD1;SLC1A2;ZNF827;EDNRA;GC;DDX39B;CARMIL1;GRIK4;C5H12orf50;IL15;TFAP2B;PRR5L;RASGRP1;SLC10A7;SLC17A4;SLC17A1;ENSBTAG00000038430;SMAD2;LDLRAD3;ENSBTAG00000049286
GO:0006810	transport	34	3581	0.0594066	0.369698	ENSBTAG00000001460;ENSBTAG00000001517;ENSBTAG00000002099;ENSBTAG00000002348;ENSBTAG00000004647;ENSBTAG00000004979;ENSBTAG00000005206;ENSBTAG00000005215;ENSBTAG00000005479;ENSBTAG00000006398;ENSBTAG00000006556;ENSBTAG00000006896;ENSBTAG00000006937;ENSBTAG00000007450;ENSBTAG00000009112;ENSBTAG00000009552;ENSBTAG00000012628;ENSBTAG00000013674;ENSBTAG00000013718;ENSBTAG00000014490;ENSBTAG00000016549;…	LIN7C;KRT18;SLC14A2;SLC4A4;UCP1;MRS2;TMEM14A;IL10RA;LIPC;ENSBTAG00000006398;COPB1;ABCA9;ABCA10;C2;TRAM2;ATP2B1;SLC1A2;EDNRA;GC;DDX39B;CARMIL1;GRIK4;C5H12orf50;IL15;TFAP2B;PRR5L;RASGRP1;SLC10A7;SLC17A4;SLC17A1;ENSBTAG00000038430;SMAD2;LDLRAD3;ENSBTAG00000049286
GO:0072657	protein localization to membrane	3	413	0.587733	0.728333	ENSBTAG00000001460;ENSBTAG00000001517;ENSBTAG00000009112	LIN7C;KRT18;TRAM2
GO:0051668	localization within membrane	3	484	0.694102	0.791111	ENSBTAG00000001460;ENSBTAG00000001517;ENSBTAG00000009112	LIN7C;KRT18;TRAM2
GO:0002009	morphogenesis of an epithelium	8	398	0.00912849	0.320696	ENSBTAG00000001460;ENSBTAG00000002606;ENSBTAG00000007159;ENSBTAG00000008148;ENSBTAG00000009846;ENSBTAG00000011237;ENSBTAG00000013674;ENSBTAG00000016071	LIN7C;LGR4;ESR1;GCM1;MTHFD1L;PKHD1;EDNRA;HHIP
GO:0007267	cell-cell signaling	7	1041	0.648961	0.767278	ENSBTAG00000001460;ENSBTAG00000002606;ENSBTAG00000007047;ENSBTAG00000013674;ENSBTAG00000014788;ENSBTAG00000020426;ENSBTAG00000039916	LIN7C;LGR4;FZD10;EDNRA;AKAP12;TFAP2B;SMAD2
GO:0009653	anatomical structure morphogenesis	16	2018	0.411823	0.638472	ENSBTAG00000001460;ENSBTAG00000002606;ENSBTAG00000002835;ENSBTAG00000003505;ENSBTAG00000004982;ENSBTAG00000007159;ENSBTAG00000008148;ENSBTAG00000009846;ENSBTAG00000011237;ENSBTAG00000011531;ENSBTAG00000013674;ENSBTAG00000015119;ENSBTAG00000016071;ENSBTAG00000016549;ENSBTAG00000020426;ENSBTAG00000039916	LIN7C;LGR4;SMAD1;DCN;GPLD1;ESR1;GCM1;MTHFD1L;PKHD1;SS18;EDNRA;SIK3;HHIP;CARMIL1;TFAP2B;SMAD2
GO:0048729	tissue morphogenesis	10	477	0.00272667	0.320696	ENSBTAG00000001460;ENSBTAG00000002606;ENSBTAG00000002835;ENSBTAG00000007159;ENSBTAG00000008148;ENSBTAG00000009846;ENSBTAG00000011237;ENSBTAG00000013674;ENSBTAG00000016071;ENSBTAG00000039916	LIN7C;LGR4;SMAD1;ESR1;GCM1;MTHFD1L;PKHD1;EDNRA;HHIP;SMAD2
GO:0007163	establishment or maintenance of cell polarity	2	154	0.312618	0.572484	ENSBTAG00000001460;ENSBTAG00000011237	LIN7C;PKHD1
GO:0006887	exocytosis	2	250	0.550419	0.708076	ENSBTAG00000001460;ENSBTAG00000021872	LIN7C;RASGRP1
GO:0006836	neurotransmitter transport	2	135	0.261004	0.537786	ENSBTAG00000001460;ENSBTAG00000012628	LIN7C;SLC1A2
GO:0001505	regulation of neurotransmitter levels	2	141	0.277336	0.547958	ENSBTAG00000001460;ENSBTAG00000012628	LIN7C;SLC1A2
GO:0140352	export from cell	6	552	0.220177	0.513438	ENSBTAG00000001460;ENSBTAG00000002348;ENSBTAG00000009552;ENSBTAG00000020426;ENSBTAG00000021872;ENSBTAG00000039916	LIN7C;SLC4A4;ATP2B1;TFAP2B;RASGRP1;SMAD2
GO:0032940	secretion by cell	4	513	0.52272	0.692377	ENSBTAG00000001460;ENSBTAG00000020426;ENSBTAG00000021872;ENSBTAG00000039916	LIN7C;TFAP2B;RASGRP1;SMAD2
GO:0046903	secretion	4	600	0.646849	0.766528	ENSBTAG00000001460;ENSBTAG00000020426;ENSBTAG00000021872;ENSBTAG00000039916	LIN7C;TFAP2B;RASGRP1;SMAD2
GO:0023061	signal release	3	298	0.374736	0.61482	ENSBTAG00000001460;ENSBTAG00000020426;ENSBTAG00000039916	LIN7C;TFAP2B;SMAD2
GO:0034370	triglyceride-rich lipoprotein particle remodeling	1	10	0.0710688	0.376331	ENSBTAG00000005479	LIPC
GO:0034372	very-low-density lipoprotein particle remodeling	1	10	0.0710688	0.376331	ENSBTAG00000005479	LIPC
GO:0034374	low-density lipoprotein particle remodeling	1	10	0.0710688	0.376331	ENSBTAG00000005479	LIPC
GO:0034375	high-density lipoprotein particle remodeling	1	13	0.0913953	0.400616	ENSBTAG00000005479	LIPC
GO:0034368	protein-lipid complex remodeling	1	22	0.149765	0.457321	ENSBTAG00000005479	LIPC
GO:0034369	plasma lipoprotein particle remodeling	1	22	0.149765	0.457321	ENSBTAG00000005479	LIPC
GO:0019433	triglyceride catabolic process	1	23	0.156016	0.463933	ENSBTAG00000005479	LIPC
GO:0034367	protein-containing complex remodeling	1	23	0.156016	0.463933	ENSBTAG00000005479	LIPC
GO:0055090	acylglycerol homeostasis	1	25	0.168383	0.474479	ENSBTAG00000005479	LIPC
GO:0070328	triglyceride homeostasis	1	25	0.168383	0.474479	ENSBTAG00000005479	LIPC
GO:0046461	neutral lipid catabolic process	1	31	0.204413	0.506393	ENSBTAG00000005479	LIPC
GO:0046464	acylglycerol catabolic process	1	31	0.204413	0.506393	ENSBTAG00000005479	LIPC
GO:0071827	plasma lipoprotein particle organization	1	32	0.210266	0.509416	ENSBTAG00000005479	LIPC
GO:0071825	protein-lipid complex subunit organization	1	35	0.227569	0.513438	ENSBTAG00000005479	LIPC
GO:0097006	regulation of plasma lipoprotein particle levels	1	45	0.282574	0.554083	ENSBTAG00000005479	LIPC
GO:0046503	glycerolipid catabolic process	1	47	0.293099	0.560393	ENSBTAG00000005479	LIPC
GO:0042632	cholesterol homeostasis	1	64	0.376599	0.61482	ENSBTAG00000005479	LIPC
GO:0055092	sterol homeostasis	1	65	0.381193	0.618249	ENSBTAG00000005479	LIPC
GO:0006641	triglyceride metabolic process	1	76	0.429573	0.647513	ENSBTAG00000005479	LIPC
GO:0030301	cholesterol transport	1	78	0.437957	0.648961	ENSBTAG00000005479	LIPC
GO:0008203	cholesterol metabolic process	1	82	0.45436	0.653781	ENSBTAG00000005479	LIPC
GO:0016125	sterol metabolic process	1	86	0.470288	0.660244	ENSBTAG00000005479	LIPC
GO:1902652	secondary alcohol metabolic process	1	86	0.470288	0.660244	ENSBTAG00000005479	LIPC
GO:0015918	sterol transport	1	89	0.481931	0.665317	ENSBTAG00000005479	LIPC
GO:0006639	acylglycerol metabolic process	1	102	0.529518	0.697091	ENSBTAG00000005479	LIPC
GO:0006638	neutral lipid metabolic process	1	103	0.532994	0.697785	ENSBTAG00000005479	LIPC
GO:0055088	lipid homeostasis	1	115	0.572766	0.718777	ENSBTAG00000005479	LIPC
GO:0044242	cellular lipid catabolic process	1	173	0.72239	0.806935	ENSBTAG00000005479	LIPC
GO:0006066	alcohol metabolic process	1	243	0.835334	0.884396	ENSBTAG00000005479	LIPC
GO:0016042	lipid catabolic process	1	258	0.852811	0.896864	ENSBTAG00000005479	LIPC
GO:0006869	lipid transport	3	313	0.404533	0.632869	ENSBTAG00000005479;ENSBTAG00000006896;ENSBTAG00000034522	LIPC;ABCA9;SLC10A7
GO:0010876	lipid localization	3	353	0.481676	0.665317	ENSBTAG00000005479;ENSBTAG00000006896;ENSBTAG00000034522	LIPC;ABCA9;SLC10A7
GO:1901615	organic hydroxy compound metabolic process	4	364	0.278855	0.54979	ENSBTAG00000005479;ENSBTAG00000013674;ENSBTAG00000013718;ENSBTAG00000015935	LIPC;EDNRA;GC;IYD
GO:0008202	steroid metabolic process	3	201	0.183863	0.486805	ENSBTAG00000005479;ENSBTAG00000007159;ENSBTAG00000013718	LIPC;ESR1;GC
GO:0015850	organic hydroxy compound transport	2	181	0.384478	0.62199	ENSBTAG00000005479;ENSBTAG00000034522	LIPC;SLC10A7
GO:2000324	positive regulation of glucocorticoid receptor signaling pathway	1	1	0.00734301	0.320696	ENSBTAG00000013541	LMO3
GO:2000322	regulation of glucocorticoid receptor signaling pathway	1	6	0.0432634	0.3507	ENSBTAG00000013541	LMO3
GO:0035360	positive regulation of peroxisome proliferator activated receptor signaling pathway	1	8	0.0572677	0.364984	ENSBTAG00000013541	LMO3
GO:0033145	positive regulation of intracellular steroid hormone receptor signaling pathway	1	10	0.0710688	0.376331	ENSBTAG00000013541	LMO3
GO:0031958	corticosteroid receptor signaling pathway	1	11	0.0778939	0.388915	ENSBTAG00000013541	LMO3
GO:0042921	glucocorticoid receptor signaling pathway	1	11	0.0778939	0.388915	ENSBTAG00000013541	LMO3
GO:0035358	regulation of peroxisome proliferator activated receptor signaling pathway	1	13	0.0913953	0.400616	ENSBTAG00000013541	LMO3
GO:0035357	peroxisome proliferator activated receptor signaling pathway	1	19	0.130734	0.44589	ENSBTAG00000013541	LMO3
GO:0070373	negative regulation of ERK1 and ERK2 cascade	1	46	0.287856	0.55803	ENSBTAG00000013541	LMO3
GO:0045600	positive regulation of fat cell differentiation	1	47	0.293099	0.560393	ENSBTAG00000013541	LMO3
GO:0033143	regulation of intracellular steroid hormone receptor signaling pathway	1	58	0.34831	0.598294	ENSBTAG00000013541	LMO3
GO:0045598	regulation of fat cell differentiation	1	101	0.526017	0.6948	ENSBTAG00000013541	LMO3
GO:0043409	negative regulation of MAPK cascade	1	122	0.594395	0.732396	ENSBTAG00000013541	LMO3
GO:0050680	negative regulation of epithelial cell proliferation	1	108	0.549993	0.708076	ENSBTAG00000008733	MAGED1
GO:0050678	regulation of epithelial cell proliferation	2	274	0.600432	0.735242	ENSBTAG00000008733;ENSBTAG00000011237	MAGED1;PKHD1
GO:0007221	positive regulation of transcription of Notch receptor target	1	5	0.036184	0.348894	ENSBTAG00000011373	MAML3
GO:0007219	Notch signaling pathway	1	141	0.647779	0.766528	ENSBTAG00000011373	MAML3
GO:0007538	primary sex determination	1	2	0.0146325	0.320696	ENSBTAG00000020079	MAP3K4
GO:0007542	primary sex determination, germ-line	1	2	0.0146325	0.320696	ENSBTAG00000020079	MAP3K4
GO:0018992	germ-line sex determination	1	2	0.0146325	0.320696	ENSBTAG00000020079	MAP3K4
GO:0019100	male germ-line sex determination	1	2	0.0146325	0.320696	ENSBTAG00000020079	MAP3K4
GO:0060718	chorionic trophoblast cell differentiation	1	6	0.0432634	0.3507	ENSBTAG00000020079	MAP3K4
GO:0060717	chorion development	1	7	0.0502912	0.361821	ENSBTAG00000020079	MAP3K4
GO:1903867	extraembryonic membrane development	1	9	0.0641935	0.369698	ENSBTAG00000020079	MAP3K4
GO:0010225	response to UV-C	1	10	0.0710688	0.376331	ENSBTAG00000020079	MAP3K4
GO:0030238	male sex determination	1	11	0.0778939	0.388915	ENSBTAG00000020079	MAP3K4
GO:0007530	sex determination	1	15	0.104701	0.413044	ENSBTAG00000020079	MAP3K4
GO:1904355	positive regulation of telomere capping	1	17	0.117813	0.433016	ENSBTAG00000020079	MAP3K4
GO:1900745	positive regulation of p38MAPK cascade	1	20	0.137124	0.450796	ENSBTAG00000020079	MAP3K4
GO:1904353	regulation of telomere capping	1	25	0.168383	0.474479	ENSBTAG00000020079	MAP3K4
GO:0051973	positive regulation of telomerase activity	1	28	0.186596	0.488576	ENSBTAG00000020079	MAP3K4
GO:0032212	positive regulation of telomere maintenance via telomerase	1	29	0.192579	0.490671	ENSBTAG00000020079	MAP3K4
GO:1900744	regulation of p38MAPK cascade	1	32	0.210266	0.509416	ENSBTAG00000020079	MAP3K4
GO:1904358	positive regulation of telomere maintenance via telomere lengthening	1	32	0.210266	0.509416	ENSBTAG00000020079	MAP3K4
GO:0016233	telomere capping	1	35	0.227569	0.513438	ENSBTAG00000020079	MAP3K4
GO:0051972	regulation of telomerase activity	1	38	0.244496	0.52892	ENSBTAG00000020079	MAP3K4
GO:0038066	p38MAPK cascade	1	39	0.250056	0.532406	ENSBTAG00000020079	MAP3K4
GO:0032210	regulation of telomere maintenance via telomerase	1	43	0.271893	0.544016	ENSBTAG00000020079	MAP3K4
GO:1904356	regulation of telomere maintenance via telomere lengthening	1	49	0.303472	0.56605	ENSBTAG00000020079	MAP3K4
GO:0007004	telomere maintenance via telomerase	1	53	0.323765	0.580131	ENSBTAG00000020079	MAP3K4
GO:2000573	positive regulation of DNA biosynthetic process	1	54	0.328747	0.582093	ENSBTAG00000020079	MAP3K4
GO:0006278	RNA-dependent DNA biosynthetic process	1	57	0.343473	0.594528	ENSBTAG00000020079	MAP3K4
GO:0032206	positive regulation of telomere maintenance	1	60	0.357878	0.602059	ENSBTAG00000020079	MAP3K4
GO:0010833	telomere maintenance via telomere lengthening	1	63	0.37197	0.613128	ENSBTAG00000020079	MAP3K4
GO:0032204	regulation of telomere maintenance	1	83	0.458386	0.655193	ENSBTAG00000020079	MAP3K4
GO:2000278	regulation of DNA biosynthetic process	1	89	0.481931	0.665317	ENSBTAG00000020079	MAP3K4
GO:2001252	positive regulation of chromosome organization	1	92	0.49332	0.674964	ENSBTAG00000020079	MAP3K4
GO:0009411	response to UV	1	116	0.575924	0.721658	ENSBTAG00000020079	MAP3K4
GO:0071897	DNA biosynthetic process	1	142	0.650387	0.767814	ENSBTAG00000020079	MAP3K4
GO:0051054	positive regulation of DNA metabolic process	1	204	0.779657	0.847313	ENSBTAG00000020079	MAP3K4
GO:0032874	positive regulation of stress-activated MAPK cascade	2	96	0.156838	0.465792	ENSBTAG00000020079;ENSBTAG00000021872	MAP3K4;RASGRP1
GO:0070304	positive regulation of stress-activated protein kinase signaling cascade	2	98	0.161993	0.470564	ENSBTAG00000020079;ENSBTAG00000021872	MAP3K4;RASGRP1
GO:0032872	regulation of stress-activated MAPK cascade	2	143	0.282777	0.554083	ENSBTAG00000020079;ENSBTAG00000021872	MAP3K4;RASGRP1
GO:0070302	regulation of stress-activated protein kinase signaling cascade	2	146	0.290932	0.560393	ENSBTAG00000020079;ENSBTAG00000021872	MAP3K4;RASGRP1
GO:0051403	stress-activated MAPK cascade	2	170	0.35552	0.602059	ENSBTAG00000020079;ENSBTAG00000021872	MAP3K4;RASGRP1
GO:0031098	stress-activated protein kinase signaling cascade	2	176	0.371379	0.613128	ENSBTAG00000020079;ENSBTAG00000021872	MAP3K4;RASGRP1
GO:0009235	cobalamin metabolic process	1	8	0.0572677	0.364984	ENSBTAG00000012800	MMAA
GO:0006767	water-soluble vitamin metabolic process	1	33	0.216076	0.513438	ENSBTAG00000012800	MMAA
GO:0033013	tetrapyrrole metabolic process	1	41	0.261054	0.537786	ENSBTAG00000012800	MMAA
GO:0006766	vitamin metabolic process	2	59	0.0698094	0.376331	ENSBTAG00000012800;ENSBTAG00000013718	MMAA;GC
GO:1901290	succinyl-CoA biosynthetic process	1	1	0.00734301	0.320696	ENSBTAG00000014272	MMUT
GO:0006104	succinyl-CoA metabolic process	1	6	0.0432634	0.3507	ENSBTAG00000014272	MMUT
GO:0050667	homocysteine metabolic process	1	12	0.0846693	0.400616	ENSBTAG00000014272	MMUT
GO:0035384	thioester biosynthetic process	1	22	0.149765	0.457321	ENSBTAG00000014272	MMUT
GO:0071616	acyl-CoA biosynthetic process	1	22	0.149765	0.457321	ENSBTAG00000014272	MMUT
GO:0000096	sulfur amino acid metabolic process	1	27	0.180569	0.480233	ENSBTAG00000014272	MMUT
GO:0033866	nucleoside bisphosphate biosynthetic process	1	34	0.221843	0.513438	ENSBTAG00000014272	MMUT
GO:0034030	ribonucleoside bisphosphate biosynthetic process	1	34	0.221843	0.513438	ENSBTAG00000014272	MMUT
GO:0034033	purine nucleoside bisphosphate biosynthetic process	1	34	0.221843	0.513438	ENSBTAG00000014272	MMUT
GO:0006637	acyl-CoA metabolic process	1	60	0.357878	0.602059	ENSBTAG00000014272	MMUT
GO:0035383	thioester metabolic process	1	60	0.357878	0.602059	ENSBTAG00000014272	MMUT
GO:0033865	nucleoside bisphosphate metabolic process	1	78	0.437957	0.648961	ENSBTAG00000014272	MMUT
GO:0033875	ribonucleoside bisphosphate metabolic process	1	78	0.437957	0.648961	ENSBTAG00000014272	MMUT
GO:0034032	purine nucleoside bisphosphate metabolic process	1	78	0.437957	0.648961	ENSBTAG00000014272	MMUT
GO:0009152	purine ribonucleotide biosynthetic process	1	138	0.639839	0.762204	ENSBTAG00000014272	MMUT
GO:0009260	ribonucleotide biosynthetic process	1	149	0.668114	0.776236	ENSBTAG00000014272	MMUT
GO:0006164	purine nucleotide biosynthetic process	1	151	0.673013	0.777084	ENSBTAG00000014272	MMUT
GO:0046390	ribose phosphate biosynthetic process	1	152	0.675436	0.777984	ENSBTAG00000014272	MMUT
GO:0072522	purine-containing compound biosynthetic process	1	156	0.684949	0.785882	ENSBTAG00000014272	MMUT
GO:0009165	nucleotide biosynthetic process	1	203	0.778007	0.845909	ENSBTAG00000014272	MMUT
GO:1901293	nucleoside phosphate biosynthetic process	1	206	0.78292	0.849367	ENSBTAG00000014272	MMUT
GO:1901605	alpha-amino acid metabolic process	2	160	0.328795	0.582093	ENSBTAG00000014272;ENSBTAG00000015935	MMUT;IYD
GO:0006520	cellular amino acid metabolic process	2	244	0.537256	0.699882	ENSBTAG00000014272;ENSBTAG00000015935	MMUT;IYD
GO:0009791	post-embryonic development	2	78	0.112178	0.424163	ENSBTAG00000014272;ENSBTAG00000039916	MMUT;SMAD2
GO:0032543	mitochondrial translation	2	50	0.0521323	0.364984	ENSBTAG00000006936;ENSBTAG00000013224	MRPS18B;RMND1
GO:0140053	mitochondrial gene expression	2	78	0.112178	0.424163	ENSBTAG00000006936;ENSBTAG00000013224	MRPS18B;RMND1
GO:0045016	mitochondrial magnesium ion transmembrane transport	1	2	0.0146325	0.320696	ENSBTAG00000004979	MRS2
GO:1903830	magnesium ion transmembrane transport	1	11	0.0778939	0.388915	ENSBTAG00000004979	MRS2
GO:0015693	magnesium ion transport	1	17	0.117813	0.433016	ENSBTAG00000004979	MRS2
GO:0009257	10-formyltetrahydrofolate biosynthetic process	1	2	0.0146325	0.320696	ENSBTAG00000009846	MTHFD1L
GO:0009256	10-formyltetrahydrofolate metabolic process	1	4	0.0290526	0.334809	ENSBTAG00000009846	MTHFD1L
GO:0015942	formate metabolic process	1	4	0.0290526	0.334809	ENSBTAG00000009846	MTHFD1L
GO:0046654	tetrahydrofolate biosynthetic process	1	4	0.0290526	0.334809	ENSBTAG00000009846	MTHFD1L
GO:0009396	folic acid-containing compound biosynthetic process	1	6	0.0432634	0.3507	ENSBTAG00000009846	MTHFD1L
GO:0048702	embryonic neurocranium morphogenesis	1	6	0.0432634	0.3507	ENSBTAG00000009846	MTHFD1L
GO:0048703	embryonic viscerocranium morphogenesis	1	8	0.0572677	0.364984	ENSBTAG00000009846	MTHFD1L
GO:0046653	tetrahydrofolate metabolic process	1	11	0.0778939	0.388915	ENSBTAG00000009846	MTHFD1L
GO:0006760	folic acid-containing compound metabolic process	1	13	0.0913953	0.400616	ENSBTAG00000009846	MTHFD1L
GO:0043650	dicarboxylic acid biosynthetic process	1	13	0.0913953	0.400616	ENSBTAG00000009846	MTHFD1L
GO:0042559	pteridine-containing compound biosynthetic process	1	15	0.104701	0.413044	ENSBTAG00000009846	MTHFD1L
GO:0042558	pteridine-containing compound metabolic process	1	23	0.156016	0.463933	ENSBTAG00000009846	MTHFD1L
GO:0043648	dicarboxylic acid metabolic process	1	64	0.376599	0.61482	ENSBTAG00000009846	MTHFD1L
GO:0001843	neural tube closure	1	73	0.416763	0.640987	ENSBTAG00000009846	MTHFD1L
GO:0060606	tube closure	1	74	0.421065	0.643837	ENSBTAG00000009846	MTHFD1L
GO:0014020	primary neural tube formation	1	77	0.43378	0.647797	ENSBTAG00000009846	MTHFD1L
GO:0001841	neural tube formation	1	83	0.458386	0.655193	ENSBTAG00000009846	MTHFD1L
GO:0001838	embryonic epithelial tube formation	1	102	0.529518	0.697091	ENSBTAG00000009846	MTHFD1L
GO:0072175	epithelial tube formation	1	109	0.553319	0.709867	ENSBTAG00000009846	MTHFD1L
GO:0035148	tube formation	1	120	0.588328	0.728333	ENSBTAG00000009846	MTHFD1L
GO:0016331	morphogenesis of embryonic epithelium	1	125	0.603328	0.736883	ENSBTAG00000009846	MTHFD1L
GO:0021915	neural tube development	1	133	0.626209	0.755857	ENSBTAG00000009846	MTHFD1L
GO:1904888	cranial skeletal system development	3	62	0.0106684	0.320696	ENSBTAG00000009846;ENSBTAG00000013674;ENSBTAG00000039916	MTHFD1L;EDNRA;SMAD2
GO:0048706	embryonic skeletal system development	3	110	0.0473384	0.361821	ENSBTAG00000009846;ENSBTAG00000013674;ENSBTAG00000039916	MTHFD1L;EDNRA;SMAD2
GO:0048562	embryonic organ morphogenesis	3	238	0.254658	0.536776	ENSBTAG00000009846;ENSBTAG00000013674;ENSBTAG00000039916	MTHFD1L;EDNRA;SMAD2
GO:0048705	skeletal system morphogenesis	4	193	0.0539763	0.364984	ENSBTAG00000009846;ENSBTAG00000015119;ENSBTAG00000016071;ENSBTAG00000039916	MTHFD1L;SIK3;HHIP;SMAD2
GO:0042398	cellular modified amino acid biosynthetic process	2	31	0.0216471	0.334809	ENSBTAG00000009846;ENSBTAG00000012628	MTHFD1L;SLC1A2
GO:0048701	embryonic cranial skeleton morphogenesis	2	41	0.0364076	0.348894	ENSBTAG00000009846;ENSBTAG00000039916	MTHFD1L;SMAD2
GO:0048704	embryonic skeletal system morphogenesis	2	84	0.126671	0.442229	ENSBTAG00000009846;ENSBTAG00000039916	MTHFD1L;SMAD2
GO:0009590	detection of gravity	1	2	0.0146325	0.320696	ENSBTAG00000013551	NOX3
GO:0009629	response to gravity	1	2	0.0146325	0.320696	ENSBTAG00000013551	NOX3
GO:0048840	otolith development	1	8	0.0572677	0.364984	ENSBTAG00000013551	NOX3
GO:0042554	superoxide anion generation	1	25	0.168383	0.474479	ENSBTAG00000013551	NOX3
GO:0006801	superoxide metabolic process	1	48	0.298305	0.560947	ENSBTAG00000013551	NOX3
GO:0009582	detection of abiotic stimulus	1	92	0.49332	0.674964	ENSBTAG00000013551	NOX3
GO:0009581	detection of external stimulus	1	93	0.49706	0.677341	ENSBTAG00000013551	NOX3
GO:0048839	inner ear development	1	152	0.675436	0.777984	ENSBTAG00000013551	NOX3
GO:0043583	ear development	2	176	0.371379	0.613128	ENSBTAG00000013551;ENSBTAG00000013674	NOX3;EDNRA
GO:0007423	sensory organ development	3	450	0.645906	0.766528	ENSBTAG00000013551;ENSBTAG00000013674;ENSBTAG00000020426	NOX3;EDNRA;TFAP2B
GO:0045761	regulation of adenylate cyclase activity	1	14	0.0980723	0.405515	ENSBTAG00000009070	NPFFR2
GO:2000479	regulation of cAMP-dependent protein kinase activity	1	14	0.0980723	0.405515	ENSBTAG00000009070	NPFFR2
GO:0031279	regulation of cyclase activity	1	24	0.162222	0.470564	ENSBTAG00000009070	NPFFR2
GO:0051339	regulation of lyase activity	1	26	0.174498	0.4775	ENSBTAG00000009070	NPFFR2
GO:0007218	neuropeptide signaling pathway	1	56	0.3386	0.58983	ENSBTAG00000009070	NPFFR2
GO:0050911	detection of chemical stimulus involved in sensory perception of smell	4	910	0.907094	0.933518	ENSBTAG00000046378;ENSBTAG00000051946;ENSBTAG00000052183;ENSBTAG00000052809	OR52A5EP;ENSBTAG00000051946;OR52S6;OR52A1E
GO:0007608	sensory perception of smell	4	928	0.914881	0.938269	ENSBTAG00000046378;ENSBTAG00000051946;ENSBTAG00000052183;ENSBTAG00000052809	OR52A5EP;ENSBTAG00000051946;OR52S6;OR52A1E
GO:0050907	detection of chemical stimulus involved in sensory perception	4	947	0.922471	0.941159	ENSBTAG00000046378;ENSBTAG00000051946;ENSBTAG00000052183;ENSBTAG00000052809	OR52A5EP;ENSBTAG00000051946;OR52S6;OR52A1E
GO:0009593	detection of chemical stimulus	4	968	0.930157	0.946553	ENSBTAG00000046378;ENSBTAG00000051946;ENSBTAG00000052183;ENSBTAG00000052809	OR52A5EP;ENSBTAG00000051946;OR52S6;OR52A1E
GO:0050906	detection of stimulus involved in sensory perception	4	996	0.939344	0.953034	ENSBTAG00000046378;ENSBTAG00000051946;ENSBTAG00000052183;ENSBTAG00000052809	OR52A5EP;ENSBTAG00000051946;OR52S6;OR52A1E
GO:0007606	sensory perception of chemical stimulus	4	1007	0.942645	0.955564	ENSBTAG00000046378;ENSBTAG00000051946;ENSBTAG00000052183;ENSBTAG00000052809	OR52A5EP;ENSBTAG00000051946;OR52S6;OR52A1E
GO:0007600	sensory perception	4	1280	0.98693	0.989438	ENSBTAG00000046378;ENSBTAG00000051946;ENSBTAG00000052183;ENSBTAG00000052809	OR52A5EP;ENSBTAG00000051946;OR52S6;OR52A1E
GO:0035092	sperm chromatin condensation	1	9	0.0641935	0.369698	ENSBTAG00000006468	PIWIL1
GO:0010528	regulation of transposition	1	14	0.0980723	0.405515	ENSBTAG00000006468	PIWIL1
GO:0010529	negative regulation of transposition	1	14	0.0980723	0.405515	ENSBTAG00000006468	PIWIL1
GO:0034587	piRNA metabolic process	1	15	0.104701	0.413044	ENSBTAG00000006468	PIWIL1
GO:0007289	spermatid nucleus differentiation	1	18	0.124297	0.437164	ENSBTAG00000006468	PIWIL1
GO:0090502	RNA phosphodiester bond hydrolysis, endonucleolytic	1	40	0.255575	0.536776	ENSBTAG00000006468	PIWIL1
GO:0032196	transposition	1	43	0.271893	0.544016	ENSBTAG00000006468	PIWIL1
GO:0090501	RNA phosphodiester bond hydrolysis	1	92	0.49332	0.674964	ENSBTAG00000006468	PIWIL1
GO:0007286	spermatid development	1	145	0.658097	0.771146	ENSBTAG00000006468	PIWIL1
GO:0048515	spermatid differentiation	1	148	0.665637	0.775559	ENSBTAG00000006468	PIWIL1
GO:0090305	nucleic acid phosphodiester bond hydrolysis	1	160	0.694186	0.791111	ENSBTAG00000006468	PIWIL1
GO:0034660	ncRNA metabolic process	1	390	0.945405	0.957951	ENSBTAG00000006468	PIWIL1
GO:0007281	germ cell development	2	230	0.505541	0.682135	ENSBTAG00000006468;ENSBTAG00000013674	PIWIL1;EDNRA
GO:0022412	cellular process involved in reproduction in multicellular organism	2	305	0.658737	0.771514	ENSBTAG00000006468;ENSBTAG00000013674	PIWIL1;EDNRA
GO:0031047	gene silencing by RNA	2	90	0.141579	0.456453	ENSBTAG00000006468;ENSBTAG00000007159	PIWIL1;ESR1
GO:0048468	cell development	7	1526	0.938898	0.95299	ENSBTAG00000006468;ENSBTAG00000007159;ENSBTAG00000011914;ENSBTAG00000013674;ENSBTAG00000016549;ENSBTAG00000017549;ENSBTAG00000018200	PIWIL1;ESR1;RASSF10;EDNRA;CARMIL1;KITLG;IL15
GO:0010608	posttranscriptional regulation of gene expression	3	386	0.54168	0.703709	ENSBTAG00000006468;ENSBTAG00000007159;ENSBTAG00000013224	PIWIL1;ESR1;RMND1
GO:0006412	translation	3	679	0.880177	0.916173	ENSBTAG00000006468;ENSBTAG00000006936;ENSBTAG00000013224	PIWIL1;MRPS18B;RMND1
GO:0043043	peptide biosynthetic process	4	696	0.75711	0.832363	ENSBTAG00000006468;ENSBTAG00000006936;ENSBTAG00000012628;ENSBTAG00000013224	PIWIL1;MRPS18B;SLC1A2;RMND1
GO:0043604	amide biosynthetic process	5	787	0.691256	0.790055	ENSBTAG00000006468;ENSBTAG00000006936;ENSBTAG00000012628;ENSBTAG00000013224;ENSBTAG00000014272	PIWIL1;MRPS18B;SLC1A2;RMND1;MMUT
GO:1901566	organonitrogen compound biosynthetic process	10	1468	0.644941	0.766219	ENSBTAG00000006468;ENSBTAG00000006936;ENSBTAG00000009023;ENSBTAG00000009846;ENSBTAG00000012628;ENSBTAG00000013224;ENSBTAG00000014272;ENSBTAG00000017391;ENSBTAG00000018200;ENSBTAG00000034522	PIWIL1;MRPS18B;TMTC3;MTHFD1L;SLC1A2;RMND1;MMUT;HS3ST2;IL15;SLC10A7
GO:0006417	regulation of translation	2	277	0.606385	0.73909	ENSBTAG00000006468;ENSBTAG00000013224	PIWIL1;RMND1
GO:0034248	regulation of cellular amide metabolic process	3	322	0.422225	0.645195	ENSBTAG00000006468;ENSBTAG00000009150;ENSBTAG00000013224	PIWIL1;SPON1;RMND1
GO:1904054	regulation of cholangiocyte proliferation	1	2	0.0146325	0.320696	ENSBTAG00000011237	PKHD1
GO:1990705	cholangiocyte proliferation	1	3	0.0218689	0.334809	ENSBTAG00000011237	PKHD1
GO:0000132	establishment of mitotic spindle orientation	1	28	0.186596	0.488576	ENSBTAG00000011237	PKHD1
GO:0040001	establishment of mitotic spindle localization	1	30	0.198518	0.500402	ENSBTAG00000011237	PKHD1
GO:0051294	establishment of spindle orientation	1	31	0.204413	0.506393	ENSBTAG00000011237	PKHD1
GO:0090175	regulation of establishment of planar polarity	1	33	0.216076	0.513438	ENSBTAG00000011237	PKHD1
GO:0051898	negative regulation of protein kinase B signaling	1	34	0.221843	0.513438	ENSBTAG00000011237	PKHD1
GO:0051293	establishment of spindle localization	1	38	0.244496	0.52892	ENSBTAG00000011237	PKHD1
GO:0051653	spindle localization	1	42	0.266494	0.538677	ENSBTAG00000011237	PKHD1
GO:1904036	negative regulation of epithelial cell apoptotic process	1	42	0.266494	0.538677	ENSBTAG00000011237	PKHD1
GO:0010824	regulation of centrosome duplication	1	44	0.277253	0.547958	ENSBTAG00000011237	PKHD1
GO:0046605	regulation of centrosome cycle	1	46	0.287856	0.55803	ENSBTAG00000011237	PKHD1
GO:0001736	establishment of planar polarity	1	47	0.293099	0.560393	ENSBTAG00000011237	PKHD1
GO:0007164	establishment of tissue polarity	1	47	0.293099	0.560393	ENSBTAG00000011237	PKHD1
GO:0032088	negative regulation of NF-kappaB transcription factor activity	1	64	0.376599	0.61482	ENSBTAG00000011237	PKHD1
GO:0001738	morphogenesis of a polarized epithelium	1	69	0.39924	0.628325	ENSBTAG00000011237	PKHD1
GO:0032006	regulation of TOR signaling	1	98	0.515357	0.685694	ENSBTAG00000011237	PKHD1
GO:0030010	establishment of cell polarity	1	110	0.55662	0.711788	ENSBTAG00000011237	PKHD1
GO:0051896	regulation of protein kinase B signaling	1	119	0.585261	0.727199	ENSBTAG00000011237	PKHD1
GO:1902850	microtubule cytoskeleton organization involved in mitosis	1	120	0.588328	0.728333	ENSBTAG00000011237	PKHD1
GO:0043491	protein kinase B signaling	1	144	0.655546	0.770828	ENSBTAG00000011237	PKHD1
GO:0050679	positive regulation of epithelial cell proliferation	1	145	0.658097	0.771146	ENSBTAG00000011237	PKHD1
GO:0045216	cell-cell junction organization	1	158	0.689602	0.789307	ENSBTAG00000011237	PKHD1
GO:0032886	regulation of microtubule-based process	1	197	0.767848	0.839878	ENSBTAG00000011237	PKHD1
GO:0034330	cell junction organization	1	499	0.976073	0.980214	ENSBTAG00000011237	PKHD1
GO:0070372	regulation of ERK1 and ERK2 cascade	3	189	0.162186	0.470564	ENSBTAG00000011237;ENSBTAG00000013541;ENSBTAG00000021872	PKHD1;LMO3;RASGRP1
GO:0070371	ERK1 and ERK2 cascade	3	205	0.191256	0.490671	ENSBTAG00000011237;ENSBTAG00000013541;ENSBTAG00000021872	PKHD1;LMO3;RASGRP1
GO:0031929	TOR signaling	2	113	0.201497	0.504168	ENSBTAG00000011237;ENSBTAG00000021029	PKHD1;PRR5L
GO:0051656	establishment of organelle localization	2	288	0.62764	0.756097	ENSBTAG00000011237;ENSBTAG00000021872	PKHD1;RASGRP1
GO:0051640	organelle localization	2	379	0.770579	0.842087	ENSBTAG00000011237;ENSBTAG00000021872	PKHD1;RASGRP1
GO:0007099	centriole replication	1	40	0.255575	0.536776	ENSBTAG00000000687	POC1B
GO:0098534	centriole assembly	1	41	0.261054	0.537786	ENSBTAG00000000687	POC1B
GO:0001895	retina homeostasis	1	43	0.271893	0.544016	ENSBTAG00000000687	POC1B
GO:0001894	tissue homeostasis	1	189	0.753582	0.829641	ENSBTAG00000000687	POC1B
GO:0060249	anatomical structure homeostasis	2	227	0.498566	0.678495	ENSBTAG00000000687;ENSBTAG00000009552	POC1B;ATP2B1
GO:0140694	non-membrane-bounded organelle assembly	2	310	0.667482	0.776236	ENSBTAG00000000687;ENSBTAG00000002512	POC1B;HAUS1
GO:0000226	microtubule cytoskeleton organization	5	531	0.351038	0.60167	ENSBTAG00000000687;ENSBTAG00000002512;ENSBTAG00000004099;ENSBTAG00000011237;ENSBTAG00000011531	POC1B;HAUS1;CCDC170;PKHD1;SS18
GO:0007017	microtubule-based process	8	775	0.209993	0.509416	ENSBTAG00000000687;ENSBTAG00000002512;ENSBTAG00000004099;ENSBTAG00000004167;ENSBTAG00000011237;ENSBTAG00000011531;ENSBTAG00000021872;ENSBTAG00000046337	POC1B;HAUS1;CCDC170;TTC29;PKHD1;SS18;RASGRP1;TUBB6
GO:0007098	centrosome cycle	3	118	0.0561665	0.364984	ENSBTAG00000000687;ENSBTAG00000002512;ENSBTAG00000011237	POC1B;HAUS1;PKHD1
GO:0031023	microtubule organizing center organization	3	124	0.0632645	0.369698	ENSBTAG00000000687;ENSBTAG00000002512;ENSBTAG00000011237	POC1B;HAUS1;PKHD1
GO:0070925	organelle assembly	3	725	0.905841	0.932634	ENSBTAG00000000687;ENSBTAG00000002512;ENSBTAG00000011237	POC1B;HAUS1;PKHD1
GO:0022607	cellular component assembly	14	2335	0.828799	0.880506	ENSBTAG00000000687;ENSBTAG00000002512;ENSBTAG00000002835;ENSBTAG00000003399;ENSBTAG00000006883;ENSBTAG00000007159;ENSBTAG00000011237;ENSBTAG00000012628;ENSBTAG00000012738;ENSBTAG00000014490;ENSBTAG00000016549;ENSBTAG00000039916;ENSBTAG00000047358;ENSBTAG00000050380	POC1B;HAUS1;SMAD1;SMARCA5;EIF4B;ESR1;PKHD1;SLC1A2;ZNF827;DDX39B;CARMIL1;SMAD2;HIGD1C;KCTD1
GO:0044085	cellular component biogenesis	14	2547	0.909044	0.934307	ENSBTAG00000000687;ENSBTAG00000002512;ENSBTAG00000002835;ENSBTAG00000003399;ENSBTAG00000006883;ENSBTAG00000007159;ENSBTAG00000011237;ENSBTAG00000012628;ENSBTAG00000012738;ENSBTAG00000014490;ENSBTAG00000016549;ENSBTAG00000039916;ENSBTAG00000047358;ENSBTAG00000050380	POC1B;HAUS1;SMAD1;SMARCA5;EIF4B;ESR1;PKHD1;SLC1A2;ZNF827;DDX39B;CARMIL1;SMAD2;HIGD1C;KCTD1
GO:0007049	cell cycle	9	1225	0.549102	0.708076	ENSBTAG00000000687;ENSBTAG00000002512;ENSBTAG00000003399;ENSBTAG00000006060;ENSBTAG00000011237;ENSBTAG00000013326;ENSBTAG00000013674;ENSBTAG00000014490;ENSBTAG00000020330	POC1B;HAUS1;SMARCA5;DCDC1;PKHD1;ANAPC10;EDNRA;DDX39B;BTG1
GO:0022402	cell cycle process	7	911	0.506385	0.682582	ENSBTAG00000000687;ENSBTAG00000002512;ENSBTAG00000003399;ENSBTAG00000006060;ENSBTAG00000011237;ENSBTAG00000013674;ENSBTAG00000014490	POC1B;HAUS1;SMARCA5;DCDC1;PKHD1;EDNRA;DDX39B
GO:0032501	multicellular organismal process	39	6047	0.866432	0.906281	ENSBTAG00000000687;ENSBTAG00000000836;ENSBTAG00000000977;ENSBTAG00000002606;ENSBTAG00000002835;ENSBTAG00000003505;ENSBTAG00000004647;ENSBTAG00000004982;ENSBTAG00000005479;ENSBTAG00000005627;ENSBTAG00000006468;ENSBTAG00000007159;ENSBTAG00000008148;ENSBTAG00000008733;ENSBTAG00000009180;ENSBTAG00000009552;ENSBTAG00000009846;ENSBTAG00000011237;ENSBTAG00000011531;ENSBTAG00000011914;ENSBTAG00000012628;…	POC1B;KRT8;CADM1;LGR4;SMAD1;DCN;UCP1;GPLD1;LIPC;PAFAH1B2;PIWIL1;ESR1;GCM1;MAGED1;NRSN1;ATP2B1;MTHFD1L;PKHD1;SS18;RASSF10;SLC1A2;NOX3;EDNRA;MMUT;SIK3;HHIP;KITLG;GTSF1;IL15;MAP3K4;TFAP2B;RASGRP1;SLC10A7;SMAD2;OR52A5EP;ENSBTAG00000048304;ENSBTAG00000051946;OR52S6;OR52A1E
GO:0065007	biological regulation	82	11039	0.470652	0.660364	ENSBTAG00000000687;ENSBTAG00000000836;ENSBTAG00000000977;ENSBTAG00000001460;ENSBTAG00000001517;ENSBTAG00000002348;ENSBTAG00000002531;ENSBTAG00000002606;ENSBTAG00000002728;ENSBTAG00000002835;ENSBTAG00000003359;ENSBTAG00000003399;ENSBTAG00000003505;ENSBTAG00000003581;ENSBTAG00000004098;ENSBTAG00000004257;ENSBTAG00000004647;ENSBTAG00000004982;ENSBTAG00000005206;ENSBTAG00000005215;ENSBTAG00000005479;…	POC1B;KRT8;CADM1;LIN7C;KRT18;SLC4A4;ARHGAP10;LGR4;ARID1B;SMAD1;ELOVL5;SMARCA5;DCN;SETD7;ARMT1;TAF4B;UCP1;GPLD1;TMEM14A;IL10RA;LIPC;PAFAH1B2;DCDC1;ENSBTAG00000006398;PIWIL1;FZD10;ESR1;C2;GCM1;MAGED1;TMTC3;NPFFR2;SPON1;ATP2B1;PLEKHG1;PKHD1;MAML3;SS18;RASSF10;SLC1A2;ZNF827;RMND1;LMO3;NOX3;EDNRA;ADGRD1;TBC1D22B;MMUT;DDX39B;AKAP12;CALCOCO1;SIK3;IYD;HHIP;CARMIL1;KITLG;IL15;TBC1D9;MAP3K4;BTG1;TFAP2B;PRR…
GO:0008150	biological_process	125	17023	1	1	ENSBTAG00000000687;ENSBTAG00000000836;ENSBTAG00000000977;ENSBTAG00000001356;ENSBTAG00000001460;ENSBTAG00000001517;ENSBTAG00000002099;ENSBTAG00000002348;ENSBTAG00000002512;ENSBTAG00000002531;ENSBTAG00000002606;ENSBTAG00000002728;ENSBTAG00000002835;ENSBTAG00000003359;ENSBTAG00000003399;ENSBTAG00000003505;ENSBTAG00000003581;ENSBTAG00000004098;ENSBTAG00000004099;ENSBTAG00000004167;ENSBTAG00000004257;…	POC1B;KRT8;CADM1;USP38;LIN7C;KRT18;SLC14A2;SLC4A4;HAUS1;ARHGAP10;LGR4;ARID1B;SMAD1;ELOVL5;SMARCA5;DCN;SETD7;ARMT1;CCDC170;TTC29;TAF4B;GSTA4;PPT2;UCP1;MRS2;GPLD1;TMEM14A;IL10RA;LIPC;PAFAH1B2;DCDC1;ART1;ENSBTAG00000006398;PIWIL1;COPB1;EIF4B;ABCA9;MRPS18B;ABCA10;DHX16;FZD10;ENSBTAG00000007075;ESR1;C2;GCM1;MAGED1;TMTC3;NPFFR2;TRAM2;SPON1;NRSN1;ATP2B1;ENSBTAG00000009656;PLEKHG1;MTHFD1L;PKHD1;MAML3;SS1…
GO:0009987	cellular process	114	15921	0.889436	0.922162	ENSBTAG00000000687;ENSBTAG00000000836;ENSBTAG00000000977;ENSBTAG00000001356;ENSBTAG00000001460;ENSBTAG00000001517;ENSBTAG00000002099;ENSBTAG00000002348;ENSBTAG00000002512;ENSBTAG00000002531;ENSBTAG00000002606;ENSBTAG00000002728;ENSBTAG00000002835;ENSBTAG00000003359;ENSBTAG00000003399;ENSBTAG00000003505;ENSBTAG00000003581;ENSBTAG00000004098;ENSBTAG00000004099;ENSBTAG00000004167;ENSBTAG00000004257;…	POC1B;KRT8;CADM1;USP38;LIN7C;KRT18;SLC14A2;SLC4A4;HAUS1;ARHGAP10;LGR4;ARID1B;SMAD1;ELOVL5;SMARCA5;DCN;SETD7;ARMT1;CCDC170;TTC29;TAF4B;GSTA4;UCP1;MRS2;GPLD1;TMEM14A;IL10RA;LIPC;PAFAH1B2;DCDC1;ART1;ENSBTAG00000006398;PIWIL1;COPB1;EIF4B;ABCA9;MRPS18B;ABCA10;DHX16;FZD10;ESR1;C2;GCM1;MAGED1;TMTC3;NPFFR2;TRAM2;SPON1;ATP2B1;MTHFD1L;PKHD1;MAML3;SS18;RASSF10;SLC1A2;ZNF827;MMAA;RMND1;ANAPC10;LMO3;NOX3;EDNR…
GO:0016043	cellular component organization	34	4885	0.676991	0.779395	ENSBTAG00000000687;ENSBTAG00000000836;ENSBTAG00000001517;ENSBTAG00000002512;ENSBTAG00000002728;ENSBTAG00000002835;ENSBTAG00000003399;ENSBTAG00000003505;ENSBTAG00000003581;ENSBTAG00000004099;ENSBTAG00000004167;ENSBTAG00000005206;ENSBTAG00000005479;ENSBTAG00000006398;ENSBTAG00000006468;ENSBTAG00000006883;ENSBTAG00000007047;ENSBTAG00000007159;ENSBTAG00000008148;ENSBTAG00000009112;ENSBTAG00000011237;…	POC1B;KRT8;KRT18;HAUS1;ARID1B;SMAD1;SMARCA5;DCN;SETD7;CCDC170;TTC29;TMEM14A;LIPC;ENSBTAG00000006398;PIWIL1;EIF4B;FZD10;ESR1;GCM1;TRAM2;PKHD1;SS18;SLC1A2;ZNF827;EDNRA;DDX39B;CARMIL1;MAP3K4;SCAF8;SMAD2;KRT3;HIGD1C;KCTD1;ENSBTAG00000051348
GO:0071840	cellular component organization or biogenesis	34	5060	0.761594	0.83458	ENSBTAG00000000687;ENSBTAG00000000836;ENSBTAG00000001517;ENSBTAG00000002512;ENSBTAG00000002728;ENSBTAG00000002835;ENSBTAG00000003399;ENSBTAG00000003505;ENSBTAG00000003581;ENSBTAG00000004099;ENSBTAG00000004167;ENSBTAG00000005206;ENSBTAG00000005479;ENSBTAG00000006398;ENSBTAG00000006468;ENSBTAG00000006883;ENSBTAG00000007047;ENSBTAG00000007159;ENSBTAG00000008148;ENSBTAG00000009112;ENSBTAG00000011237;…	POC1B;KRT8;KRT18;HAUS1;ARID1B;SMAD1;SMARCA5;DCN;SETD7;CCDC170;TTC29;TMEM14A;LIPC;ENSBTAG00000006398;PIWIL1;EIF4B;FZD10;ESR1;GCM1;TRAM2;PKHD1;SS18;SLC1A2;ZNF827;EDNRA;DDX39B;CARMIL1;MAP3K4;SCAF8;SMAD2;KRT3;HIGD1C;KCTD1;ENSBTAG00000051348
GO:0006996	organelle organization	23	3098	0.513324	0.685301	ENSBTAG00000000687;ENSBTAG00000000836;ENSBTAG00000001517;ENSBTAG00000002512;ENSBTAG00000002728;ENSBTAG00000003399;ENSBTAG00000003505;ENSBTAG00000003581;ENSBTAG00000004099;ENSBTAG00000004167;ENSBTAG00000005206;ENSBTAG00000006398;ENSBTAG00000006468;ENSBTAG00000007047;ENSBTAG00000009112;ENSBTAG00000011237;ENSBTAG00000011531;ENSBTAG00000012738;ENSBTAG00000013674;ENSBTAG00000016549;ENSBTAG00000020079;…	POC1B;KRT8;KRT18;HAUS1;ARID1B;SMARCA5;DCN;SETD7;CCDC170;TTC29;TMEM14A;ENSBTAG00000006398;PIWIL1;FZD10;TRAM2;PKHD1;SS18;ZNF827;EDNRA;CARMIL1;MAP3K4;KRT3;HIGD1C
GO:0007010	cytoskeleton organization	10	1199	0.38567	0.62199	ENSBTAG00000000687;ENSBTAG00000000836;ENSBTAG00000001517;ENSBTAG00000002512;ENSBTAG00000004099;ENSBTAG00000007047;ENSBTAG00000011237;ENSBTAG00000011531;ENSBTAG00000016549;ENSBTAG00000045662	POC1B;KRT8;KRT18;HAUS1;CCDC170;FZD10;PKHD1;SS18;CARMIL1;KRT3
GO:0008283	cell population proliferation	14	1370	0.129874	0.44589	ENSBTAG00000000687;ENSBTAG00000002606;ENSBTAG00000002835;ENSBTAG00000004982;ENSBTAG00000007159;ENSBTAG00000008733;ENSBTAG00000011237;ENSBTAG00000011914;ENSBTAG00000016071;ENSBTAG00000017549;ENSBTAG00000018200;ENSBTAG00000020330;ENSBTAG00000020426;ENSBTAG00000021872	POC1B;LGR4;SMAD1;GPLD1;ESR1;MAGED1;PKHD1;RASSF10;HHIP;KITLG;IL15;BTG1;TFAP2B;RASGRP1
GO:0048871	multicellular organismal homeostasis	6	370	0.0553786	0.364984	ENSBTAG00000000687;ENSBTAG00000002606;ENSBTAG00000004647;ENSBTAG00000013551;ENSBTAG00000018200;ENSBTAG00000020426	POC1B;LGR4;UCP1;NOX3;IL15;TFAP2B
GO:0065008	regulation of biological quality	24	2785	0.22592	0.513438	ENSBTAG00000000687;ENSBTAG00000001460;ENSBTAG00000002348;ENSBTAG00000002606;ENSBTAG00000002835;ENSBTAG00000003505;ENSBTAG00000004647;ENSBTAG00000005206;ENSBTAG00000005479;ENSBTAG00000007159;ENSBTAG00000009552;ENSBTAG00000011237;ENSBTAG00000012628;ENSBTAG00000013551;ENSBTAG00000013674;ENSBTAG00000015935;ENSBTAG00000016549;ENSBTAG00000017549;ENSBTAG00000018200;ENSBTAG00000020426;ENSBTAG00000034522;…	POC1B;LIN7C;SLC4A4;LGR4;SMAD1;DCN;UCP1;TMEM14A;LIPC;ESR1;ATP2B1;PKHD1;SLC1A2;NOX3;EDNRA;IYD;CARMIL1;KITLG;IL15;TFAP2B;SLC10A7;TRIM44;ENSBTAG00000038430;SMAD2
GO:0051298	centrosome duplication	2	69	0.0913632	0.400616	ENSBTAG00000000687;ENSBTAG00000011237	POC1B;PKHD1
GO:0060271	cilium assembly	2	294	0.638857	0.762204	ENSBTAG00000000687;ENSBTAG00000011237	POC1B;PKHD1
GO:0120031	plasma membrane bounded cell projection assembly	3	436	0.624588	0.75467	ENSBTAG00000000687;ENSBTAG00000011237;ENSBTAG00000016549	POC1B;PKHD1;CARMIL1
GO:0030031	cell projection assembly	3	441	0.632299	0.758567	ENSBTAG00000000687;ENSBTAG00000011237;ENSBTAG00000016549	POC1B;PKHD1;CARMIL1
GO:0042592	homeostatic process	16	1294	0.0274823	0.334809	ENSBTAG00000000687;ENSBTAG00000002348;ENSBTAG00000002606;ENSBTAG00000002835;ENSBTAG00000003505;ENSBTAG00000004647;ENSBTAG00000005479;ENSBTAG00000009552;ENSBTAG00000011237;ENSBTAG00000013551;ENSBTAG00000013674;ENSBTAG00000017549;ENSBTAG00000018200;ENSBTAG00000020426;ENSBTAG00000034522;ENSBTAG00000038430	POC1B;SLC4A4;LGR4;SMAD1;DCN;UCP1;LIPC;ATP2B1;PKHD1;NOX3;EDNRA;KITLG;IL15;TFAP2B;SLC10A7;ENSBTAG00000038430
GO:0044782	cilium organization	3	326	0.430034	0.647513	ENSBTAG00000000687;ENSBTAG00000004167;ENSBTAG00000011237	POC1B;TTC29;PKHD1
GO:0120036	plasma membrane bounded cell projection organization	5	1089	0.908402	0.934052	ENSBTAG00000000687;ENSBTAG00000004167;ENSBTAG00000011237;ENSBTAG00000013674;ENSBTAG00000016549	POC1B;TTC29;PKHD1;EDNRA;CARMIL1
GO:0030030	cell projection organization	6	1109	0.831645	0.882738	ENSBTAG00000000687;ENSBTAG00000004167;ENSBTAG00000011237;ENSBTAG00000013674;ENSBTAG00000016549;ENSBTAG00000051348	POC1B;TTC29;PKHD1;EDNRA;CARMIL1;ENSBTAG00000051348
GO:0098734	macromolecule depalmitoylation	1	13	0.0913953	0.400616	ENSBTAG00000004436	PPT2
GO:0045292	mRNA cis splicing, via spliceosome	1	22	0.149765	0.457321	ENSBTAG00000016589	PRPF40B
GO:0038203	TORC2 signaling	1	9	0.0641935	0.369698	ENSBTAG00000021029	PRR5L
GO:0010762	regulation of fibroblast migration	1	27	0.180569	0.480233	ENSBTAG00000021029	PRR5L
GO:0010761	fibroblast migration	1	42	0.266494	0.538677	ENSBTAG00000021029	PRR5L
GO:0061014	positive regulation of mRNA catabolic process	1	69	0.39924	0.628325	ENSBTAG00000021029	PRR5L
GO:1903313	positive regulation of mRNA metabolic process	1	88	0.478078	0.665317	ENSBTAG00000021029	PRR5L
GO:0061013	regulation of mRNA catabolic process	1	126	0.606263	0.73909	ENSBTAG00000021029	PRR5L
GO:0006402	mRNA catabolic process	1	176	0.728523	0.811488	ENSBTAG00000021029	PRR5L
GO:0006401	RNA catabolic process	1	213	0.793968	0.856184	ENSBTAG00000021029	PRR5L
GO:1903311	regulation of mRNA metabolic process	1	217	0.800029	0.859196	ENSBTAG00000021029	PRR5L
GO:0001933	negative regulation of protein phosphorylation	1	229	0.81717	0.872338	ENSBTAG00000021029	PRR5L
GO:0042326	negative regulation of phosphorylation	1	264	0.859275	0.901	ENSBTAG00000021029	PRR5L
GO:0034655	nucleobase-containing compound catabolic process	1	298	0.890928	0.9229	ENSBTAG00000021029	PRR5L
GO:0010563	negative regulation of phosphorus metabolic process	1	307	0.898051	0.927033	ENSBTAG00000021029	PRR5L
GO:0045936	negative regulation of phosphate metabolic process	1	307	0.898051	0.927033	ENSBTAG00000021029	PRR5L
GO:0046700	heterocycle catabolic process	1	321	0.908224	0.934052	ENSBTAG00000021029	PRR5L
GO:0044270	cellular nitrogen compound catabolic process	1	323	0.909593	0.934464	ENSBTAG00000021029	PRR5L
GO:0019439	aromatic compound catabolic process	1	339	0.919837	0.940237	ENSBTAG00000021029	PRR5L
GO:1901361	organic cyclic compound catabolic process	1	356	0.929462	0.946252	ENSBTAG00000021029	PRR5L
GO:0031400	negative regulation of protein modification process	2	365	0.752191	0.828495	ENSBTAG00000021029;ENSBTAG00000037389	PRR5L;TRIM44
GO:0032269	negative regulation of cellular protein metabolic process	2	715	0.970059	0.975769	ENSBTAG00000021029;ENSBTAG00000037389	PRR5L;TRIM44
GO:0032252	secretory granule localization	1	3	0.0218689	0.334809	ENSBTAG00000021872	RASGRP1
GO:0033089	positive regulation of T cell differentiation in thymus	1	9	0.0641935	0.369698	ENSBTAG00000021872	RASGRP1
GO:0032725	positive regulation of granulocyte macrophage colony-stimulating factor production	1	11	0.0778939	0.388915	ENSBTAG00000021872	RASGRP1
GO:0032604	granulocyte macrophage colony-stimulating factor production	1	13	0.0913953	0.400616	ENSBTAG00000021872	RASGRP1
GO:0032645	regulation of granulocyte macrophage colony-stimulating factor production	1	13	0.0913953	0.400616	ENSBTAG00000021872	RASGRP1
GO:0033081	regulation of T cell differentiation in thymus	1	22	0.149765	0.457321	ENSBTAG00000021872	RASGRP1
GO:0043303	mast cell degranulation	1	25	0.168383	0.474479	ENSBTAG00000021872	RASGRP1
GO:0002448	mast cell mediated immunity	1	27	0.180569	0.480233	ENSBTAG00000021872	RASGRP1
GO:0002279	mast cell activation involved in immune response	1	28	0.186596	0.488576	ENSBTAG00000021872	RASGRP1
GO:0047496	vesicle transport along microtubule	1	32	0.210266	0.509416	ENSBTAG00000021872	RASGRP1
GO:0045576	mast cell activation	1	37	0.238895	0.523577	ENSBTAG00000021872	RASGRP1
GO:0002437	inflammatory response to antigenic stimulus	1	39	0.250056	0.532406	ENSBTAG00000021872	RASGRP1
GO:0043299	leukocyte degranulation	1	40	0.255575	0.536776	ENSBTAG00000021872	RASGRP1
GO:0099518	vesicle cytoskeletal trafficking	1	50	0.308601	0.568893	ENSBTAG00000021872	RASGRP1
GO:0032418	lysosome localization	1	52	0.318748	0.57903	ENSBTAG00000021872	RASGRP1
GO:0032729	positive regulation of interferon-gamma production	1	54	0.328747	0.582093	ENSBTAG00000021872	RASGRP1
GO:0072384	organelle transport along microtubule	1	55	0.333691	0.585506	ENSBTAG00000021872	RASGRP1
GO:0002275	myeloid cell activation involved in immune response	1	59	0.353111	0.601738	ENSBTAG00000021872	RASGRP1
GO:0002444	myeloid leukocyte mediated immunity	1	60	0.357878	0.602059	ENSBTAG00000021872	RASGRP1
GO:0032760	positive regulation of tumor necrosis factor production	1	63	0.37197	0.613128	ENSBTAG00000021872	RASGRP1
GO:1903557	positive regulation of tumor necrosis factor superfamily cytokine production	1	66	0.385755	0.62199	ENSBTAG00000021872	RASGRP1
GO:0033077	T cell differentiation in thymus	1	69	0.39924	0.628325	ENSBTAG00000021872	RASGRP1
GO:0045582	positive regulation of T cell differentiation	1	69	0.39924	0.628325	ENSBTAG00000021872	RASGRP1
GO:0046330	positive regulation of JNK cascade	1	72	0.412431	0.638472	ENSBTAG00000021872	RASGRP1
GO:0032649	regulation of interferon-gamma production	1	79	0.442103	0.650369	ENSBTAG00000021872	RASGRP1
GO:0032609	interferon-gamma production	1	80	0.446219	0.650369	ENSBTAG00000021872	RASGRP1
GO:0042100	B cell proliferation	1	84	0.462383	0.655758	ENSBTAG00000021872	RASGRP1
GO:0046328	regulation of JNK cascade	1	103	0.532994	0.697785	ENSBTAG00000021872	RASGRP1
GO:0032640	tumor necrosis factor production	1	104	0.536444	0.699208	ENSBTAG00000021872	RASGRP1
GO:0032680	regulation of tumor necrosis factor production	1	104	0.536444	0.699208	ENSBTAG00000021872	RASGRP1
GO:0071706	tumor necrosis factor superfamily cytokine production	1	107	0.546643	0.70685	ENSBTAG00000021872	RASGRP1
GO:1903555	regulation of tumor necrosis factor superfamily cytokine production	1	107	0.546643	0.70685	ENSBTAG00000021872	RASGRP1
GO:0051650	establishment of vesicle localization	1	110	0.55662	0.711788	ENSBTAG00000021872	RASGRP1
GO:0010970	transport along microtubule	1	116	0.575924	0.721658	ENSBTAG00000021872	RASGRP1
GO:0051648	vesicle localization	1	120	0.588328	0.728333	ENSBTAG00000021872	RASGRP1
GO:0007254	JNK cascade	1	122	0.594395	0.732396	ENSBTAG00000021872	RASGRP1
GO:0070374	positive regulation of ERK1 and ERK2 cascade	1	130	0.617786	0.749129	ENSBTAG00000021872	RASGRP1
GO:0099111	microtubule-based transport	1	137	0.637153	0.760919	ENSBTAG00000021872	RASGRP1
GO:0030705	cytoskeleton-dependent intracellular transport	1	143	0.652976	0.769718	ENSBTAG00000021872	RASGRP1
GO:0045055	regulated exocytosis	1	162	0.698703	0.792824	ENSBTAG00000021872	RASGRP1
GO:0002366	leukocyte activation involved in immune response	1	209	0.787725	0.853339	ENSBTAG00000021872	RASGRP1
GO:0002263	cell activation involved in immune response	1	211	0.79087	0.85479	ENSBTAG00000021872	RASGRP1
GO:0042113	B cell activation	1	226	0.813027	0.869212	ENSBTAG00000021872	RASGRP1
GO:2000179	positive regulation of neural precursor cell proliferation	1	41	0.261054	0.537786	ENSBTAG00000011914	RASSF10
GO:2000177	regulation of neural precursor cell proliferation	1	69	0.39924	0.628325	ENSBTAG00000011914	RASSF10
GO:0050769	positive regulation of neurogenesis	1	140	0.645152	0.766219	ENSBTAG00000011914	RASSF10
GO:0051962	positive regulation of nervous system development	1	179	0.734521	0.815484	ENSBTAG00000011914	RASSF10
GO:0050767	regulation of neurogenesis	1	236	0.826488	0.878839	ENSBTAG00000011914	RASSF10
GO:0051960	regulation of nervous system development	1	295	0.888446	0.922162	ENSBTAG00000011914	RASSF10
GO:0010720	positive regulation of cell development	2	200	0.43312	0.647797	ENSBTAG00000011914;ENSBTAG00000016549	RASSF10;CARMIL1
GO:0060284	regulation of cell development	2	342	0.719264	0.805759	ENSBTAG00000011914;ENSBTAG00000016549	RASSF10;CARMIL1
GO:0048699	generation of neurons	3	1063	0.986432	0.989357	ENSBTAG00000011914;ENSBTAG00000013674;ENSBTAG00000016071	RASSF10;EDNRA;HHIP
GO:0061351	neural precursor cell proliferation	2	121	0.223004	0.513438	ENSBTAG00000011914;ENSBTAG00000016071	RASSF10;HHIP
GO:0070131	positive regulation of mitochondrial translation	1	13	0.0913953	0.400616	ENSBTAG00000013224	RMND1
GO:0070129	regulation of mitochondrial translation	1	22	0.149765	0.457321	ENSBTAG00000013224	RMND1
GO:0062125	regulation of mitochondrial gene expression	1	26	0.174498	0.4775	ENSBTAG00000013224	RMND1
GO:0045727	positive regulation of translation	1	98	0.515357	0.685694	ENSBTAG00000013224	RMND1
GO:0034250	positive regulation of cellular amide metabolic process	1	117	0.57906	0.724054	ENSBTAG00000013224	RMND1
GO:0060567	negative regulation of DNA-templated transcription, termination	1	2	0.0146325	0.320696	ENSBTAG00000031917	SCAF8
GO:0120191	negative regulation of termination of RNA polymerase II transcription	1	2	0.0146325	0.320696	ENSBTAG00000031917	SCAF8
GO:2000805	negative regulation of termination of RNA polymerase II transcription, poly(A)-coupled	1	2	0.0146325	0.320696	ENSBTAG00000031917	SCAF8
GO:0030846	termination of RNA polymerase II transcription, poly(A)-coupled	1	3	0.0218689	0.334809	ENSBTAG00000031917	SCAF8
GO:1904594	regulation of termination of RNA polymerase II transcription	1	3	0.0218689	0.334809	ENSBTAG00000031917	SCAF8
GO:2000804	regulation of termination of RNA polymerase II transcription, poly(A)-coupled	1	3	0.0218689	0.334809	ENSBTAG00000031917	SCAF8
GO:0031554	regulation of DNA-templated transcription, termination	1	4	0.0290526	0.334809	ENSBTAG00000031917	SCAF8
GO:0006369	termination of RNA polymerase II transcription	1	9	0.0641935	0.369698	ENSBTAG00000031917	SCAF8
GO:0006353	DNA-templated transcription, termination	1	16	0.111281	0.422795	ENSBTAG00000031917	SCAF8
GO:0006378	mRNA polyadenylation	1	32	0.210266	0.509416	ENSBTAG00000031917	SCAF8
GO:0043631	RNA polyadenylation	1	38	0.244496	0.52892	ENSBTAG00000031917	SCAF8
GO:0031124	mRNA 3'-end processing	1	47	0.293099	0.560393	ENSBTAG00000031917	SCAF8
GO:0031123	RNA 3'-end processing	1	77	0.43378	0.647797	ENSBTAG00000031917	SCAF8
GO:0018026	peptidyl-lysine monomethylation	1	11	0.0778939	0.388915	ENSBTAG00000003581	SETD7
GO:0051570	regulation of histone H3-K9 methylation	1	20	0.137124	0.450796	ENSBTAG00000003581	SETD7
GO:0018027	peptidyl-lysine dimethylation	1	22	0.149765	0.457321	ENSBTAG00000003581	SETD7
GO:0051567	histone H3-K9 methylation	1	25	0.168383	0.474479	ENSBTAG00000003581	SETD7
GO:0061647	histone H3-K9 modification	1	35	0.227569	0.513438	ENSBTAG00000003581	SETD7
GO:0034968	histone lysine methylation	1	98	0.515357	0.685694	ENSBTAG00000003581	SETD7
GO:0018022	peptidyl-lysine methylation	1	112	0.563149	0.715115	ENSBTAG00000003581	SETD7
GO:0018205	peptidyl-lysine modification	1	331	0.914868	0.938269	ENSBTAG00000003581	SETD7
GO:0001958	endochondral ossification	1	26	0.174498	0.4775	ENSBTAG00000015119	SIK3
GO:0036075	replacement ossification	1	26	0.174498	0.4775	ENSBTAG00000015119	SIK3
GO:0060351	cartilage development involved in endochondral bone morphogenesis	1	29	0.192579	0.490671	ENSBTAG00000015119	SIK3
GO:0060350	endochondral bone morphogenesis	1	49	0.303472	0.56605	ENSBTAG00000015119	SIK3
GO:0060349	bone morphogenesis	1	78	0.437957	0.648961	ENSBTAG00000015119	SIK3
GO:0035107	appendage morphogenesis	2	123	0.228412	0.513438	ENSBTAG00000015119;ENSBTAG00000020426	SIK3;TFAP2B
GO:0035108	limb morphogenesis	2	123	0.228412	0.513438	ENSBTAG00000015119;ENSBTAG00000020426	SIK3;TFAP2B
GO:0048736	appendage development	2	149	0.299077	0.560947	ENSBTAG00000015119;ENSBTAG00000020426	SIK3;TFAP2B
GO:0060173	limb development	2	149	0.299077	0.560947	ENSBTAG00000015119;ENSBTAG00000020426	SIK3;TFAP2B
GO:0034436	glycoprotein transport	1	3	0.0218689	0.334809	ENSBTAG00000034522	SLC10A7
GO:0030210	heparin biosynthetic process	1	9	0.0641935	0.369698	ENSBTAG00000034522	SLC10A7
GO:0015721	bile acid and bile salt transport	1	16	0.111281	0.422795	ENSBTAG00000034522	SLC10A7
GO:1901264	carbohydrate derivative transport	1	63	0.37197	0.613128	ENSBTAG00000034522	SLC10A7
GO:0015718	monocarboxylic acid transport	1	78	0.437957	0.648961	ENSBTAG00000034522	SLC10A7
GO:0071918	urea transmembrane transport	1	6	0.0432634	0.3507	ENSBTAG00000002099	SLC14A2
GO:0015840	urea transport	1	8	0.0572677	0.364984	ENSBTAG00000002099	SLC14A2
GO:0019755	one-carbon compound transport	1	11	0.0778939	0.388915	ENSBTAG00000002099	SLC14A2
GO:0055085	transmembrane transport	16	1313	0.0308914	0.341682	ENSBTAG00000002099;ENSBTAG00000002348;ENSBTAG00000004647;ENSBTAG00000004979;ENSBTAG00000006398;ENSBTAG00000006896;ENSBTAG00000006937;ENSBTAG00000009112;ENSBTAG00000009552;ENSBTAG00000012628;ENSBTAG00000013674;ENSBTAG00000013718;ENSBTAG00000034522;ENSBTAG00000037738;ENSBTAG00000037917;ENSBTAG00000049286	SLC14A2;SLC4A4;UCP1;MRS2;ENSBTAG00000006398;ABCA9;ABCA10;TRAM2;ATP2B1;SLC1A2;EDNRA;GC;SLC10A7;SLC17A4;SLC17A1;ENSBTAG00000049286
GO:0042886	amide transport	3	197	0.176551	0.480233	ENSBTAG00000002099;ENSBTAG00000020426;ENSBTAG00000039916	SLC14A2;TFAP2B;SMAD2
GO:0015747	urate transport	1	5	0.036184	0.348894	ENSBTAG00000037917	SLC17A1
GO:0015739	sialic acid transport	2	3	0.000159701	0.199509	ENSBTAG00000037738;ENSBTAG00000037917	SLC17A4;SLC17A1
GO:0042883	cysteine transport	1	3	0.0218689	0.334809	ENSBTAG00000012628	SLC1A2
GO:0070777	D-aspartate transport	1	3	0.0218689	0.334809	ENSBTAG00000012628	SLC1A2
GO:0070779	D-aspartate import across plasma membrane	1	3	0.0218689	0.334809	ENSBTAG00000012628	SLC1A2
GO:1903712	cysteine transmembrane transport	1	3	0.0218689	0.334809	ENSBTAG00000012628	SLC1A2
GO:0042940	D-amino acid transport	1	4	0.0290526	0.334809	ENSBTAG00000012628	SLC1A2
GO:0140009	L-aspartate import across plasma membrane	1	4	0.0290526	0.334809	ENSBTAG00000012628	SLC1A2
GO:0071314	cellular response to cocaine	1	5	0.036184	0.348894	ENSBTAG00000012628	SLC1A2
GO:0000101	sulfur amino acid transport	1	6	0.0432634	0.3507	ENSBTAG00000012628	SLC1A2
GO:0070778	L-aspartate transmembrane transport	1	6	0.0432634	0.3507	ENSBTAG00000012628	SLC1A2
GO:0006750	glutathione biosynthetic process	1	8	0.0572677	0.364984	ENSBTAG00000012628	SLC1A2
GO:0019184	nonribosomal peptide biosynthetic process	1	9	0.0641935	0.369698	ENSBTAG00000012628	SLC1A2
GO:0070207	protein homotrimerization	1	11	0.0778939	0.388915	ENSBTAG00000012628	SLC1A2
GO:0010232	vascular transport	1	13	0.0913953	0.400616	ENSBTAG00000012628	SLC1A2
GO:0070206	protein trimerization	1	13	0.0913953	0.400616	ENSBTAG00000012628	SLC1A2
GO:0098712	L-glutamate import across plasma membrane	1	13	0.0913953	0.400616	ENSBTAG00000012628	SLC1A2
GO:0150104	transport across blood-brain barrier	1	13	0.0913953	0.400616	ENSBTAG00000012628	SLC1A2
GO:0015740	C4-dicarboxylate transport	1	14	0.0980723	0.405515	ENSBTAG00000012628	SLC1A2
GO:0051938	L-glutamate import	1	14	0.0980723	0.405515	ENSBTAG00000012628	SLC1A2
GO:0042220	response to cocaine	1	15	0.104701	0.413044	ENSBTAG00000012628	SLC1A2
GO:0015813	L-glutamate transmembrane transport	1	19	0.130734	0.44589	ENSBTAG00000012628	SLC1A2
GO:0071312	cellular response to alkaloid	1	20	0.137124	0.450796	ENSBTAG00000012628	SLC1A2
GO:0070633	transepithelial transport	1	23	0.156016	0.463933	ENSBTAG00000012628	SLC1A2
GO:0098810	neurotransmitter reuptake	1	23	0.156016	0.463933	ENSBTAG00000012628	SLC1A2
GO:0046326	positive regulation of glucose import	1	27	0.180569	0.480233	ENSBTAG00000012628	SLC1A2
GO:0001504	neurotransmitter uptake	1	29	0.192579	0.490671	ENSBTAG00000012628	SLC1A2
GO:0015800	acidic amino acid transport	1	30	0.198518	0.500402	ENSBTAG00000012628	SLC1A2
GO:0010828	positive regulation of glucose transmembrane transport	1	32	0.210266	0.509416	ENSBTAG00000012628	SLC1A2
GO:0043279	response to alkaloid	1	33	0.216076	0.513438	ENSBTAG00000012628	SLC1A2
GO:0007632	visual behavior	1	34	0.221843	0.513438	ENSBTAG00000012628	SLC1A2
GO:0046324	regulation of glucose import	1	40	0.255575	0.536776	ENSBTAG00000012628	SLC1A2
GO:0015804	neutral amino acid transport	1	41	0.261054	0.537786	ENSBTAG00000012628	SLC1A2
GO:0072348	sulfur compound transport	1	41	0.261054	0.537786	ENSBTAG00000012628	SLC1A2
GO:0089718	amino acid import across plasma membrane	1	47	0.293099	0.560393	ENSBTAG00000012628	SLC1A2
GO:0043090	amino acid import	1	53	0.323765	0.580131	ENSBTAG00000012628	SLC1A2
GO:0006835	dicarboxylic acid transport	1	54	0.328747	0.582093	ENSBTAG00000012628	SLC1A2
GO:0043200	response to amino acid	1	55	0.333691	0.585506	ENSBTAG00000012628	SLC1A2
GO:0046323	glucose import	1	56	0.3386	0.58983	ENSBTAG00000012628	SLC1A2
GO:0001101	response to acid chemical	1	63	0.37197	0.613128	ENSBTAG00000012628	SLC1A2
GO:1902475	L-alpha-amino acid transmembrane transport	1	66	0.385755	0.62199	ENSBTAG00000012628	SLC1A2
GO:0015807	L-amino acid transport	1	67	0.390283	0.627155	ENSBTAG00000012628	SLC1A2
GO:0003333	amino acid transmembrane transport	1	84	0.462383	0.655758	ENSBTAG00000012628	SLC1A2
GO:0006865	amino acid transport	1	108	0.549993	0.708076	ENSBTAG00000012628	SLC1A2
GO:0030534	adult behavior	1	112	0.563149	0.715115	ENSBTAG00000012628	SLC1A2
GO:1905039	carboxylic acid transmembrane transport	1	121	0.591373	0.730574	ENSBTAG00000012628	SLC1A2
GO:1903825	organic acid transmembrane transport	1	122	0.594395	0.732396	ENSBTAG00000012628	SLC1A2
GO:0098739	import across plasma membrane	1	148	0.665637	0.775559	ENSBTAG00000012628	SLC1A2
GO:0021537	telencephalon development	1	173	0.72239	0.806935	ENSBTAG00000012628	SLC1A2
GO:0031668	cellular response to extracellular stimulus	1	175	0.726493	0.809609	ENSBTAG00000012628	SLC1A2
GO:0071496	cellular response to external stimulus	1	217	0.800029	0.859196	ENSBTAG00000012628	SLC1A2
GO:0030900	forebrain development	1	261	0.856079	0.898599	ENSBTAG00000012628	SLC1A2
GO:0007610	behavior	1	412	0.953759	0.962706	ENSBTAG00000012628	SLC1A2
GO:0010259	multicellular organism aging	2	40	0.0347956	0.348894	ENSBTAG00000012628;ENSBTAG00000013674	SLC1A2;EDNRA
GO:0010827	regulation of glucose transmembrane transport	2	53	0.0578238	0.364984	ENSBTAG00000012628;ENSBTAG00000013674	SLC1A2;EDNRA
GO:1904659	glucose transmembrane transport	2	80	0.116959	0.433016	ENSBTAG00000012628;ENSBTAG00000013674	SLC1A2;EDNRA
GO:0008645	hexose transmembrane transport	2	82	0.121791	0.437164	ENSBTAG00000012628;ENSBTAG00000013674	SLC1A2;EDNRA
GO:0015749	monosaccharide transmembrane transport	2	87	0.134077	0.450796	ENSBTAG00000012628;ENSBTAG00000013674	SLC1A2;EDNRA
GO:0034219	carbohydrate transmembrane transport	2	89	0.139068	0.454661	ENSBTAG00000012628;ENSBTAG00000013674	SLC1A2;EDNRA
GO:0008643	carbohydrate transport	2	109	0.190839	0.490671	ENSBTAG00000012628;ENSBTAG00000013674	SLC1A2;EDNRA
GO:0007568	aging	2	110	0.193496	0.492479	ENSBTAG00000012628;ENSBTAG00000013674	SLC1A2;EDNRA
GO:0034764	positive regulation of transmembrane transport	2	123	0.228412	0.513438	ENSBTAG00000012628;ENSBTAG00000013674	SLC1A2;EDNRA
GO:0009611	response to wounding	2	319	0.682772	0.784145	ENSBTAG00000012628;ENSBTAG00000013674	SLC1A2;EDNRA
GO:0034762	regulation of transmembrane transport	2	350	0.731111	0.813988	ENSBTAG00000012628;ENSBTAG00000013674	SLC1A2;EDNRA
GO:0051260	protein homooligomerization	2	160	0.328795	0.582093	ENSBTAG00000012628;ENSBTAG00000050380	SLC1A2;KCTD1
GO:0051259	protein complex oligomerization	2	206	0.448061	0.65145	ENSBTAG00000012628;ENSBTAG00000050380	SLC1A2;KCTD1
GO:0009416	response to light stimulus	2	220	0.482053	0.665317	ENSBTAG00000012628;ENSBTAG00000020079	SLC1A2;MAP3K4
GO:0009314	response to radiation	2	306	0.6605	0.772583	ENSBTAG00000012628;ENSBTAG00000020079	SLC1A2;MAP3K4
GO:0044272	sulfur compound biosynthetic process	3	87	0.0262132	0.334809	ENSBTAG00000012628;ENSBTAG00000014272;ENSBTAG00000034522	SLC1A2;MMUT;SLC10A7
GO:0035264	multicellular organism growth	2	136	0.263726	0.538677	ENSBTAG00000012628;ENSBTAG00000015119	SLC1A2;SIK3
GO:0015849	organic acid transport	2	232	0.510156	0.684442	ENSBTAG00000012628;ENSBTAG00000034522	SLC1A2;SLC10A7
GO:0046942	carboxylic acid transport	4	210	0.0691386	0.376331	ENSBTAG00000012628;ENSBTAG00000034522;ENSBTAG00000037738;ENSBTAG00000037917	SLC1A2;SLC10A7;SLC17A4;SLC17A1
GO:0036376	sodium ion export across plasma membrane	1	10	0.0710688	0.376331	ENSBTAG00000002348	SLC4A4
GO:0045821	positive regulation of glycolytic process	1	12	0.0846693	0.400616	ENSBTAG00000002348	SLC4A4
GO:0015701	bicarbonate transport	1	19	0.130734	0.44589	ENSBTAG00000002348	SLC4A4
GO:1903580	positive regulation of ATP metabolic process	1	21	0.143468	0.456453	ENSBTAG00000002348	SLC4A4
GO:0045981	positive regulation of nucleotide metabolic process	1	23	0.156016	0.463933	ENSBTAG00000002348	SLC4A4
GO:1900544	positive regulation of purine nucleotide metabolic process	1	23	0.156016	0.463933	ENSBTAG00000002348	SLC4A4
GO:0006110	regulation of glycolytic process	1	37	0.238895	0.523577	ENSBTAG00000002348	SLC4A4
GO:0043470	regulation of carbohydrate catabolic process	1	40	0.255575	0.536776	ENSBTAG00000002348	SLC4A4
GO:0045913	positive regulation of carbohydrate metabolic process	1	42	0.266494	0.538677	ENSBTAG00000002348	SLC4A4
GO:0051453	regulation of intracellular pH	1	51	0.313693	0.572484	ENSBTAG00000002348	SLC4A4
GO:0030641	regulation of cellular pH	1	57	0.343473	0.594528	ENSBTAG00000002348	SLC4A4
GO:0006140	regulation of nucleotide metabolic process	1	59	0.353111	0.601738	ENSBTAG00000002348	SLC4A4
GO:1900542	regulation of purine nucleotide metabolic process	1	59	0.353111	0.601738	ENSBTAG00000002348	SLC4A4
GO:0006885	regulation of pH	1	68	0.394778	0.628325	ENSBTAG00000002348	SLC4A4
GO:1903578	regulation of ATP metabolic process	1	68	0.394778	0.628325	ENSBTAG00000002348	SLC4A4
GO:0006096	glycolytic process	1	69	0.39924	0.628325	ENSBTAG00000002348	SLC4A4
GO:0006757	ATP generation from ADP	1	69	0.39924	0.628325	ENSBTAG00000002348	SLC4A4
GO:0046031	ADP metabolic process	1	74	0.421065	0.643837	ENSBTAG00000002348	SLC4A4
GO:0009135	purine nucleoside diphosphate metabolic process	1	79	0.442103	0.650369	ENSBTAG00000002348	SLC4A4
GO:0009179	purine ribonucleoside diphosphate metabolic process	1	79	0.442103	0.650369	ENSBTAG00000002348	SLC4A4
GO:0006165	nucleoside diphosphate phosphorylation	1	84	0.462383	0.655758	ENSBTAG00000002348	SLC4A4
GO:0046939	nucleotide phosphorylation	1	86	0.470288	0.660244	ENSBTAG00000002348	SLC4A4
GO:0009185	ribonucleoside diphosphate metabolic process	1	88	0.478078	0.665317	ENSBTAG00000002348	SLC4A4
GO:0006090	pyruvate metabolic process	1	90	0.485755	0.669256	ENSBTAG00000002348	SLC4A4
GO:0043467	regulation of generation of precursor metabolites and energy	1	97	0.511751	0.684442	ENSBTAG00000002348	SLC4A4
GO:0009132	nucleoside diphosphate metabolic process	1	105	0.539868	0.7022	ENSBTAG00000002348	SLC4A4
GO:0016052	carbohydrate catabolic process	1	113	0.566378	0.715378	ENSBTAG00000002348	SLC4A4
GO:0035725	sodium ion transmembrane transport	1	126	0.606263	0.73909	ENSBTAG00000002348	SLC4A4
GO:0006109	regulation of carbohydrate metabolic process	1	130	0.617786	0.749129	ENSBTAG00000002348	SLC4A4
GO:0015698	inorganic anion transport	1	141	0.647779	0.766528	ENSBTAG00000002348	SLC4A4
GO:0046034	ATP metabolic process	1	246	0.838987	0.886554	ENSBTAG00000002348	SLC4A4
GO:0006091	generation of precursor metabolites and energy	1	366	0.934579	0.94942	ENSBTAG00000002348	SLC4A4
GO:0070839	metal ion export	2	33	0.0243477	0.334809	ENSBTAG00000002348;ENSBTAG00000009552	SLC4A4;ATP2B1
GO:0140115	export across plasma membrane	2	40	0.0347956	0.348894	ENSBTAG00000002348;ENSBTAG00000009552	SLC4A4;ATP2B1
GO:0030003	cellular cation homeostasis	7	435	0.0414717	0.3507	ENSBTAG00000002348;ENSBTAG00000009552;ENSBTAG00000011237;ENSBTAG00000013674;ENSBTAG00000020426;ENSBTAG00000034522;ENSBTAG00000038430	SLC4A4;ATP2B1;PKHD1;EDNRA;TFAP2B;SLC10A7;ENSBTAG00000038430
GO:0006873	cellular ion homeostasis	7	449	0.0477477	0.361821	ENSBTAG00000002348;ENSBTAG00000009552;ENSBTAG00000011237;ENSBTAG00000013674;ENSBTAG00000020426;ENSBTAG00000034522;ENSBTAG00000038430	SLC4A4;ATP2B1;PKHD1;EDNRA;TFAP2B;SLC10A7;ENSBTAG00000038430
GO:0055080	cation homeostasis	7	503	0.0774574	0.388915	ENSBTAG00000002348;ENSBTAG00000009552;ENSBTAG00000011237;ENSBTAG00000013674;ENSBTAG00000020426;ENSBTAG00000034522;ENSBTAG00000038430	SLC4A4;ATP2B1;PKHD1;EDNRA;TFAP2B;SLC10A7;ENSBTAG00000038430
GO:0098771	inorganic ion homeostasis	7	515	0.085266	0.400616	ENSBTAG00000002348;ENSBTAG00000009552;ENSBTAG00000011237;ENSBTAG00000013674;ENSBTAG00000020426;ENSBTAG00000034522;ENSBTAG00000038430	SLC4A4;ATP2B1;PKHD1;EDNRA;TFAP2B;SLC10A7;ENSBTAG00000038430
GO:0055082	cellular chemical homeostasis	7	531	0.0963578	0.405515	ENSBTAG00000002348;ENSBTAG00000009552;ENSBTAG00000011237;ENSBTAG00000013674;ENSBTAG00000020426;ENSBTAG00000034522;ENSBTAG00000038430	SLC4A4;ATP2B1;PKHD1;EDNRA;TFAP2B;SLC10A7;ENSBTAG00000038430
GO:0019725	cellular homeostasis	7	607	0.159195	0.470564	ENSBTAG00000002348;ENSBTAG00000009552;ENSBTAG00000011237;ENSBTAG00000013674;ENSBTAG00000020426;ENSBTAG00000034522;ENSBTAG00000038430	SLC4A4;ATP2B1;PKHD1;EDNRA;TFAP2B;SLC10A7;ENSBTAG00000038430
GO:0042391	regulation of membrane potential	2	288	0.62764	0.756097	ENSBTAG00000002348;ENSBTAG00000003505	SLC4A4;DCN
GO:0050801	ion homeostasis	8	547	0.0485602	0.361821	ENSBTAG00000002348;ENSBTAG00000003505;ENSBTAG00000009552;ENSBTAG00000011237;ENSBTAG00000013674;ENSBTAG00000020426;ENSBTAG00000034522;ENSBTAG00000038430	SLC4A4;DCN;ATP2B1;PKHD1;EDNRA;TFAP2B;SLC10A7;ENSBTAG00000038430
GO:0031329	regulation of cellular catabolic process	7	574	0.129924	0.44589	ENSBTAG00000002348;ENSBTAG00000003505;ENSBTAG00000004982;ENSBTAG00000005215;ENSBTAG00000005627;ENSBTAG00000009023;ENSBTAG00000021029	SLC4A4;DCN;GPLD1;IL10RA;PAFAH1B2;TMTC3;PRR5L
GO:0009894	regulation of catabolic process	7	695	0.249724	0.532406	ENSBTAG00000002348;ENSBTAG00000003505;ENSBTAG00000004982;ENSBTAG00000005215;ENSBTAG00000005627;ENSBTAG00000009023;ENSBTAG00000021029	SLC4A4;DCN;GPLD1;IL10RA;PAFAH1B2;TMTC3;PRR5L
GO:0031331	positive regulation of cellular catabolic process	6	320	0.0307637	0.341682	ENSBTAG00000002348;ENSBTAG00000003505;ENSBTAG00000004982;ENSBTAG00000005627;ENSBTAG00000009023;ENSBTAG00000021029	SLC4A4;DCN;GPLD1;PAFAH1B2;TMTC3;PRR5L
GO:0009896	positive regulation of catabolic process	6	375	0.0583486	0.367317	ENSBTAG00000002348;ENSBTAG00000003505;ENSBTAG00000004982;ENSBTAG00000005627;ENSBTAG00000009023;ENSBTAG00000021029	SLC4A4;DCN;GPLD1;PAFAH1B2;TMTC3;PRR5L
GO:1901135	carbohydrate derivative metabolic process	9	818	0.147529	0.457321	ENSBTAG00000002348;ENSBTAG00000003505;ENSBTAG00000004982;ENSBTAG00000009023;ENSBTAG00000013674;ENSBTAG00000014272;ENSBTAG00000017391;ENSBTAG00000018200;ENSBTAG00000034522	SLC4A4;DCN;GPLD1;TMTC3;EDNRA;MMUT;HS3ST2;IL15;SLC10A7
GO:0048878	chemical homeostasis	9	836	0.161532	0.470564	ENSBTAG00000002348;ENSBTAG00000003505;ENSBTAG00000005479;ENSBTAG00000009552;ENSBTAG00000011237;ENSBTAG00000013674;ENSBTAG00000020426;ENSBTAG00000034522;ENSBTAG00000038430	SLC4A4;DCN;LIPC;ATP2B1;PKHD1;EDNRA;TFAP2B;SLC10A7;ENSBTAG00000038430
GO:0006814	sodium ion transport	3	171	0.131325	0.446618	ENSBTAG00000002348;ENSBTAG00000013674;ENSBTAG00000034522	SLC4A4;EDNRA;SLC10A7
GO:0055067	monovalent inorganic cation homeostasis	3	109	0.0462873	0.361821	ENSBTAG00000002348;ENSBTAG00000013674;ENSBTAG00000020426	SLC4A4;EDNRA;TFAP2B
GO:0062013	positive regulation of small molecule metabolic process	2	85	0.129129	0.44589	ENSBTAG00000002348;ENSBTAG00000003359	SLC4A4;ELOVL5
GO:0062012	regulation of small molecule metabolic process	2	233	0.512454	0.684867	ENSBTAG00000002348;ENSBTAG00000003359	SLC4A4;ELOVL5
GO:0032787	monocarboxylic acid metabolic process	4	436	0.398545	0.628325	ENSBTAG00000002348;ENSBTAG00000003359;ENSBTAG00000005479;ENSBTAG00000009846	SLC4A4;ELOVL5;LIPC;MTHFD1L
GO:0044281	small molecule metabolic process	11	1374	0.42854	0.647513	ENSBTAG00000002348;ENSBTAG00000003359;ENSBTAG00000005479;ENSBTAG00000009846;ENSBTAG00000012800;ENSBTAG00000013718;ENSBTAG00000014272;ENSBTAG00000015935;ENSBTAG00000016549;ENSBTAG00000020426;ENSBTAG00000037917	SLC4A4;ELOVL5;LIPC;MTHFD1L;MMAA;GC;MMUT;IYD;CARMIL1;TFAP2B;SLC17A1
GO:0019752	carboxylic acid metabolic process	6	695	0.402572	0.631934	ENSBTAG00000002348;ENSBTAG00000003359;ENSBTAG00000005479;ENSBTAG00000009846;ENSBTAG00000014272;ENSBTAG00000015935	SLC4A4;ELOVL5;LIPC;MTHFD1L;MMUT;IYD
GO:0043436	oxoacid metabolic process	6	708	0.419709	0.643837	ENSBTAG00000002348;ENSBTAG00000003359;ENSBTAG00000005479;ENSBTAG00000009846;ENSBTAG00000014272;ENSBTAG00000015935	SLC4A4;ELOVL5;LIPC;MTHFD1L;MMUT;IYD
GO:0006082	organic acid metabolic process	8	733	0.171201	0.4775	ENSBTAG00000002348;ENSBTAG00000003359;ENSBTAG00000005479;ENSBTAG00000009846;ENSBTAG00000014272;ENSBTAG00000015935;ENSBTAG00000016549;ENSBTAG00000037917	SLC4A4;ELOVL5;LIPC;MTHFD1L;MMUT;IYD;CARMIL1;SLC17A1
GO:0042327	positive regulation of phosphorylation	7	595	0.148217	0.457321	ENSBTAG00000002348;ENSBTAG00000007047;ENSBTAG00000017549;ENSBTAG00000018200;ENSBTAG00000020079;ENSBTAG00000021029;ENSBTAG00000021872	SLC4A4;FZD10;KITLG;IL15;MAP3K4;PRR5L;RASGRP1
GO:0010562	positive regulation of phosphorus metabolic process	7	646	0.197306	0.500402	ENSBTAG00000002348;ENSBTAG00000007047;ENSBTAG00000017549;ENSBTAG00000018200;ENSBTAG00000020079;ENSBTAG00000021029;ENSBTAG00000021872	SLC4A4;FZD10;KITLG;IL15;MAP3K4;PRR5L;RASGRP1
GO:0045937	positive regulation of phosphate metabolic process	7	646	0.197306	0.500402	ENSBTAG00000002348;ENSBTAG00000007047;ENSBTAG00000017549;ENSBTAG00000018200;ENSBTAG00000020079;ENSBTAG00000021029;ENSBTAG00000021872	SLC4A4;FZD10;KITLG;IL15;MAP3K4;PRR5L;RASGRP1
GO:0042325	regulation of phosphorylation	9	913	0.228087	0.513438	ENSBTAG00000002348;ENSBTAG00000007047;ENSBTAG00000009070;ENSBTAG00000017549;ENSBTAG00000018200;ENSBTAG00000020079;ENSBTAG00000021029;ENSBTAG00000021872;ENSBTAG00000026586	SLC4A4;FZD10;NPFFR2;KITLG;IL15;MAP3K4;PRR5L;RASGRP1;PPP1R14C
GO:0019220	regulation of phosphate metabolic process	9	1013	0.326841	0.582093	ENSBTAG00000002348;ENSBTAG00000007047;ENSBTAG00000009070;ENSBTAG00000017549;ENSBTAG00000018200;ENSBTAG00000020079;ENSBTAG00000021029;ENSBTAG00000021872;ENSBTAG00000026586	SLC4A4;FZD10;NPFFR2;KITLG;IL15;MAP3K4;PRR5L;RASGRP1;PPP1R14C
GO:0051174	regulation of phosphorus metabolic process	9	1013	0.326841	0.582093	ENSBTAG00000002348;ENSBTAG00000007047;ENSBTAG00000009070;ENSBTAG00000017549;ENSBTAG00000018200;ENSBTAG00000020079;ENSBTAG00000021029;ENSBTAG00000021872;ENSBTAG00000026586	SLC4A4;FZD10;NPFFR2;KITLG;IL15;MAP3K4;PRR5L;RASGRP1;PPP1R14C
GO:0019637	organophosphate metabolic process	4	734	0.792776	0.856068	ENSBTAG00000002348;ENSBTAG00000004982;ENSBTAG00000014111;ENSBTAG00000014272	SLC4A4;GPLD1;INPP4B;MMUT
GO:0031323	regulation of cellular metabolic process	39	4750	0.232248	0.519205	ENSBTAG00000002348;ENSBTAG00000002606;ENSBTAG00000002728;ENSBTAG00000002835;ENSBTAG00000003359;ENSBTAG00000003399;ENSBTAG00000003505;ENSBTAG00000003581;ENSBTAG00000004257;ENSBTAG00000004647;ENSBTAG00000004982;ENSBTAG00000005215;ENSBTAG00000005627;ENSBTAG00000006468;ENSBTAG00000007047;ENSBTAG00000007159;ENSBTAG00000008148;ENSBTAG00000009023;ENSBTAG00000009070;ENSBTAG00000009150;ENSBTAG00000011237;…	SLC4A4;LGR4;ARID1B;SMAD1;ELOVL5;SMARCA5;DCN;SETD7;TAF4B;UCP1;GPLD1;IL10RA;PAFAH1B2;PIWIL1;FZD10;ESR1;GCM1;TMTC3;NPFFR2;SPON1;PKHD1;MAML3;SS18;ZNF827;RMND1;DDX39B;CALCOCO1;KITLG;IL15;MAP3K4;TFAP2B;PRR5L;RASGRP1;PPP1R14C;SCAF8;TRIM26;TRIM44;SMAD2;KCTD1
GO:0080090	regulation of primary metabolic process	37	4602	0.288517	0.558504	ENSBTAG00000002348;ENSBTAG00000002606;ENSBTAG00000002728;ENSBTAG00000002835;ENSBTAG00000003359;ENSBTAG00000003399;ENSBTAG00000003505;ENSBTAG00000003581;ENSBTAG00000004257;ENSBTAG00000004647;ENSBTAG00000004982;ENSBTAG00000006468;ENSBTAG00000007047;ENSBTAG00000007159;ENSBTAG00000008148;ENSBTAG00000009023;ENSBTAG00000009070;ENSBTAG00000009150;ENSBTAG00000011237;ENSBTAG00000011373;ENSBTAG00000011531;…	SLC4A4;LGR4;ARID1B;SMAD1;ELOVL5;SMARCA5;DCN;SETD7;TAF4B;UCP1;GPLD1;PIWIL1;FZD10;ESR1;GCM1;TMTC3;NPFFR2;SPON1;PKHD1;MAML3;SS18;ZNF827;RMND1;DDX39B;CALCOCO1;KITLG;IL15;MAP3K4;TFAP2B;PRR5L;RASGRP1;SCAF8;TRIM26;TRIM44;SMAD2;LDLRAD3;KCTD1
GO:0031325	positive regulation of cellular metabolic process	29	2534	0.00880225	0.320696	ENSBTAG00000002348;ENSBTAG00000002606;ENSBTAG00000002728;ENSBTAG00000002835;ENSBTAG00000003359;ENSBTAG00000003399;ENSBTAG00000003505;ENSBTAG00000004257;ENSBTAG00000004982;ENSBTAG00000005627;ENSBTAG00000007047;ENSBTAG00000007159;ENSBTAG00000008148;ENSBTAG00000009023;ENSBTAG00000009150;ENSBTAG00000011373;ENSBTAG00000011531;ENSBTAG00000013224;ENSBTAG00000014490;ENSBTAG00000015016;ENSBTAG00000017549;…	SLC4A4;LGR4;ARID1B;SMAD1;ELOVL5;SMARCA5;DCN;TAF4B;GPLD1;PAFAH1B2;FZD10;ESR1;GCM1;TMTC3;SPON1;MAML3;SS18;RMND1;DDX39B;CALCOCO1;KITLG;IL15;MAP3K4;TFAP2B;PRR5L;RASGRP1;SCAF8;TRIM44;SMAD2
GO:0034641	cellular nitrogen compound metabolic process	39	5361	0.561884	0.714658	ENSBTAG00000002348;ENSBTAG00000002606;ENSBTAG00000002728;ENSBTAG00000002835;ENSBTAG00000003399;ENSBTAG00000003505;ENSBTAG00000003581;ENSBTAG00000004257;ENSBTAG00000004288;ENSBTAG00000004647;ENSBTAG00000006468;ENSBTAG00000006936;ENSBTAG00000006960;ENSBTAG00000007159;ENSBTAG00000008148;ENSBTAG00000009150;ENSBTAG00000009846;ENSBTAG00000011237;ENSBTAG00000011373;ENSBTAG00000011531;ENSBTAG00000012628;…	SLC4A4;LGR4;ARID1B;SMAD1;SMARCA5;DCN;SETD7;TAF4B;GSTA4;UCP1;PIWIL1;MRPS18B;DHX16;ESR1;GCM1;SPON1;MTHFD1L;PKHD1;MAML3;SS18;SLC1A2;ZNF827;RMND1;EDNRA;LSM6;MMUT;DDX39B;CALCOCO1;PRPF40B;MAP3K4;TFAP2B;PRR5L;ENSBTAG00000025485;SCAF8;TRIM26;TRIM44;GSTA5;SMAD2;KCTD1
GO:0019219	regulation of nucleobase-containing compound metabolic process	25	3188	0.392449	0.628325	ENSBTAG00000002348;ENSBTAG00000002606;ENSBTAG00000002728;ENSBTAG00000002835;ENSBTAG00000003399;ENSBTAG00000003505;ENSBTAG00000003581;ENSBTAG00000004257;ENSBTAG00000004647;ENSBTAG00000007159;ENSBTAG00000008148;ENSBTAG00000011237;ENSBTAG00000011373;ENSBTAG00000011531;ENSBTAG00000012738;ENSBTAG00000014490;ENSBTAG00000015016;ENSBTAG00000020079;ENSBTAG00000020426;ENSBTAG00000021029;ENSBTAG00000031917;…	SLC4A4;LGR4;ARID1B;SMAD1;SMARCA5;DCN;SETD7;TAF4B;UCP1;ESR1;GCM1;PKHD1;MAML3;SS18;ZNF827;DDX39B;CALCOCO1;MAP3K4;TFAP2B;PRR5L;SCAF8;TRIM26;TRIM44;SMAD2;KCTD1
GO:0051171	regulation of nitrogen compound metabolic process	36	4476	0.291864	0.560393	ENSBTAG00000002348;ENSBTAG00000002606;ENSBTAG00000002728;ENSBTAG00000002835;ENSBTAG00000003399;ENSBTAG00000003505;ENSBTAG00000003581;ENSBTAG00000004257;ENSBTAG00000004647;ENSBTAG00000004982;ENSBTAG00000006468;ENSBTAG00000007047;ENSBTAG00000007159;ENSBTAG00000008148;ENSBTAG00000009023;ENSBTAG00000009070;ENSBTAG00000009150;ENSBTAG00000011237;ENSBTAG00000011373;ENSBTAG00000011531;ENSBTAG00000012738;…	SLC4A4;LGR4;ARID1B;SMAD1;SMARCA5;DCN;SETD7;TAF4B;UCP1;GPLD1;PIWIL1;FZD10;ESR1;GCM1;TMTC3;NPFFR2;SPON1;PKHD1;MAML3;SS18;ZNF827;RMND1;DDX39B;CALCOCO1;KITLG;IL15;MAP3K4;TFAP2B;PRR5L;RASGRP1;SCAF8;TRIM26;TRIM44;SMAD2;LDLRAD3;KCTD1
GO:1901360	organic cyclic compound metabolic process	36	4866	0.51271	0.684867	ENSBTAG00000002348;ENSBTAG00000002606;ENSBTAG00000002728;ENSBTAG00000002835;ENSBTAG00000003399;ENSBTAG00000003505;ENSBTAG00000003581;ENSBTAG00000004257;ENSBTAG00000004647;ENSBTAG00000005479;ENSBTAG00000006468;ENSBTAG00000006960;ENSBTAG00000007159;ENSBTAG00000008148;ENSBTAG00000009846;ENSBTAG00000011237;ENSBTAG00000011373;ENSBTAG00000011531;ENSBTAG00000012738;ENSBTAG00000012800;ENSBTAG00000013674;…	SLC4A4;LGR4;ARID1B;SMAD1;SMARCA5;DCN;SETD7;TAF4B;UCP1;LIPC;PIWIL1;DHX16;ESR1;GCM1;MTHFD1L;PKHD1;MAML3;SS18;ZNF827;MMAA;EDNRA;GC;LSM6;MMUT;DDX39B;CALCOCO1;IYD;PRPF40B;MAP3K4;TFAP2B;PRR5L;SCAF8;TRIM26;TRIM44;SMAD2;KCTD1
GO:0006725	cellular aromatic compound metabolic process	34	4712	0.581806	0.725268	ENSBTAG00000002348;ENSBTAG00000002606;ENSBTAG00000002728;ENSBTAG00000002835;ENSBTAG00000003399;ENSBTAG00000003505;ENSBTAG00000003581;ENSBTAG00000004257;ENSBTAG00000004647;ENSBTAG00000006468;ENSBTAG00000006960;ENSBTAG00000007159;ENSBTAG00000008148;ENSBTAG00000009846;ENSBTAG00000011237;ENSBTAG00000011373;ENSBTAG00000011531;ENSBTAG00000012738;ENSBTAG00000012800;ENSBTAG00000013674;ENSBTAG00000014060;…	SLC4A4;LGR4;ARID1B;SMAD1;SMARCA5;DCN;SETD7;TAF4B;UCP1;PIWIL1;DHX16;ESR1;GCM1;MTHFD1L;PKHD1;MAML3;SS18;ZNF827;MMAA;EDNRA;LSM6;MMUT;DDX39B;CALCOCO1;IYD;PRPF40B;MAP3K4;TFAP2B;PRR5L;SCAF8;TRIM26;TRIM44;SMAD2;KCTD1
GO:0046483	heterocycle metabolic process	32	4664	0.706211	0.79752	ENSBTAG00000002348;ENSBTAG00000002606;ENSBTAG00000002728;ENSBTAG00000002835;ENSBTAG00000003399;ENSBTAG00000003505;ENSBTAG00000003581;ENSBTAG00000004257;ENSBTAG00000004647;ENSBTAG00000006468;ENSBTAG00000006960;ENSBTAG00000007159;ENSBTAG00000008148;ENSBTAG00000009846;ENSBTAG00000011237;ENSBTAG00000011373;ENSBTAG00000011531;ENSBTAG00000012738;ENSBTAG00000012800;ENSBTAG00000014060;ENSBTAG00000014272;…	SLC4A4;LGR4;ARID1B;SMAD1;SMARCA5;DCN;SETD7;TAF4B;UCP1;PIWIL1;DHX16;ESR1;GCM1;MTHFD1L;PKHD1;MAML3;SS18;ZNF827;MMAA;LSM6;MMUT;DDX39B;CALCOCO1;PRPF40B;MAP3K4;TFAP2B;PRR5L;SCAF8;TRIM26;TRIM44;SMAD2;KCTD1
GO:0006139	nucleobase-containing compound metabolic process	30	4555	0.786625	0.852928	ENSBTAG00000002348;ENSBTAG00000002606;ENSBTAG00000002728;ENSBTAG00000002835;ENSBTAG00000003399;ENSBTAG00000003505;ENSBTAG00000003581;ENSBTAG00000004257;ENSBTAG00000004647;ENSBTAG00000006468;ENSBTAG00000006960;ENSBTAG00000007159;ENSBTAG00000008148;ENSBTAG00000011237;ENSBTAG00000011373;ENSBTAG00000011531;ENSBTAG00000012738;ENSBTAG00000014060;ENSBTAG00000014272;ENSBTAG00000014490;ENSBTAG00000015016;…	SLC4A4;LGR4;ARID1B;SMAD1;SMARCA5;DCN;SETD7;TAF4B;UCP1;PIWIL1;DHX16;ESR1;GCM1;PKHD1;MAML3;SS18;ZNF827;LSM6;MMUT;DDX39B;CALCOCO1;PRPF40B;MAP3K4;TFAP2B;PRR5L;SCAF8;TRIM26;TRIM44;SMAD2;KCTD1
GO:0045935	positive regulation of nucleobase-containing compound metabolic process	19	1557	0.0189147	0.334809	ENSBTAG00000002348;ENSBTAG00000002606;ENSBTAG00000002728;ENSBTAG00000002835;ENSBTAG00000003399;ENSBTAG00000003505;ENSBTAG00000004257;ENSBTAG00000007159;ENSBTAG00000008148;ENSBTAG00000011373;ENSBTAG00000011531;ENSBTAG00000014490;ENSBTAG00000015016;ENSBTAG00000020079;ENSBTAG00000020426;ENSBTAG00000021029;ENSBTAG00000031917;ENSBTAG00000037389;ENSBTAG00000039916	SLC4A4;LGR4;ARID1B;SMAD1;SMARCA5;DCN;TAF4B;ESR1;GCM1;MAML3;SS18;DDX39B;CALCOCO1;MAP3K4;TFAP2B;PRR5L;SCAF8;TRIM44;SMAD2
GO:0051173	positive regulation of nitrogen compound metabolic process	27	2389	0.0136078	0.320696	ENSBTAG00000002348;ENSBTAG00000002606;ENSBTAG00000002728;ENSBTAG00000002835;ENSBTAG00000003399;ENSBTAG00000003505;ENSBTAG00000004257;ENSBTAG00000004982;ENSBTAG00000007047;ENSBTAG00000007159;ENSBTAG00000008148;ENSBTAG00000009023;ENSBTAG00000009150;ENSBTAG00000011373;ENSBTAG00000011531;ENSBTAG00000013224;ENSBTAG00000014490;ENSBTAG00000015016;ENSBTAG00000017549;ENSBTAG00000018200;ENSBTAG00000020079;…	SLC4A4;LGR4;ARID1B;SMAD1;SMARCA5;DCN;TAF4B;GPLD1;FZD10;ESR1;GCM1;TMTC3;SPON1;MAML3;SS18;RMND1;DDX39B;CALCOCO1;KITLG;IL15;MAP3K4;TFAP2B;PRR5L;RASGRP1;SCAF8;TRIM44;SMAD2
GO:0009150	purine ribonucleotide metabolic process	2	281	0.614217	0.747445	ENSBTAG00000002348;ENSBTAG00000014272	SLC4A4;MMUT
GO:0009259	ribonucleotide metabolic process	2	296	0.642537	0.76388	ENSBTAG00000002348;ENSBTAG00000014272	SLC4A4;MMUT
GO:0006163	purine nucleotide metabolic process	2	299	0.648002	0.766528	ENSBTAG00000002348;ENSBTAG00000014272	SLC4A4;MMUT
GO:0019693	ribose phosphate metabolic process	2	300	0.64981	0.767814	ENSBTAG00000002348;ENSBTAG00000014272	SLC4A4;MMUT
GO:0072521	purine-containing compound metabolic process	2	319	0.682772	0.784145	ENSBTAG00000002348;ENSBTAG00000014272	SLC4A4;MMUT
GO:0009117	nucleotide metabolic process	2	372	0.761537	0.83458	ENSBTAG00000002348;ENSBTAG00000014272	SLC4A4;MMUT
GO:0006753	nucleoside phosphate metabolic process	2	381	0.773108	0.843293	ENSBTAG00000002348;ENSBTAG00000014272	SLC4A4;MMUT
GO:0055086	nucleobase-containing small molecule metabolic process	2	441	0.838471	0.886554	ENSBTAG00000002348;ENSBTAG00000014272	SLC4A4;MMUT
GO:0030001	metal ion transport	6	658	0.35379	0.601882	ENSBTAG00000002348;ENSBTAG00000004979;ENSBTAG00000009552;ENSBTAG00000013674;ENSBTAG00000034522;ENSBTAG00000038430	SLC4A4;MRS2;ATP2B1;EDNRA;SLC10A7;ENSBTAG00000038430
GO:0098656	anion transmembrane transport	2	215	0.470058	0.660244	ENSBTAG00000002348;ENSBTAG00000012628	SLC4A4;SLC1A2
GO:0015711	organic anion transport	5	273	0.0509499	0.364346	ENSBTAG00000002348;ENSBTAG00000012628;ENSBTAG00000034522;ENSBTAG00000037738;ENSBTAG00000037917	SLC4A4;SLC1A2;SLC10A7;SLC17A4;SLC17A1
GO:0006820	anion transport	5	392	0.161943	0.470564	ENSBTAG00000002348;ENSBTAG00000012628;ENSBTAG00000034522;ENSBTAG00000037738;ENSBTAG00000037917	SLC4A4;SLC1A2;SLC10A7;SLC17A4;SLC17A1
GO:0016310	phosphorylation	14	1492	0.205073	0.507218	ENSBTAG00000002348;ENSBTAG00000002835;ENSBTAG00000004257;ENSBTAG00000007047;ENSBTAG00000009070;ENSBTAG00000013674;ENSBTAG00000015119;ENSBTAG00000017549;ENSBTAG00000018200;ENSBTAG00000020079;ENSBTAG00000021029;ENSBTAG00000021872;ENSBTAG00000026586;ENSBTAG00000039916	SLC4A4;SMAD1;TAF4B;FZD10;NPFFR2;EDNRA;SIK3;KITLG;IL15;MAP3K4;PRR5L;RASGRP1;PPP1R14C;SMAD2
GO:0006796	phosphate-containing compound metabolic process	17	2213	0.460508	0.655758	ENSBTAG00000002348;ENSBTAG00000002835;ENSBTAG00000004257;ENSBTAG00000004982;ENSBTAG00000007047;ENSBTAG00000009070;ENSBTAG00000013674;ENSBTAG00000014111;ENSBTAG00000014272;ENSBTAG00000015119;ENSBTAG00000017549;ENSBTAG00000018200;ENSBTAG00000020079;ENSBTAG00000021029;ENSBTAG00000021872;ENSBTAG00000026586;ENSBTAG00000039916	SLC4A4;SMAD1;TAF4B;GPLD1;FZD10;NPFFR2;EDNRA;INPP4B;MMUT;SIK3;KITLG;IL15;MAP3K4;PRR5L;RASGRP1;PPP1R14C;SMAD2
GO:0006793	phosphorus metabolic process	17	2238	0.480061	0.665317	ENSBTAG00000002348;ENSBTAG00000002835;ENSBTAG00000004257;ENSBTAG00000004982;ENSBTAG00000007047;ENSBTAG00000009070;ENSBTAG00000013674;ENSBTAG00000014111;ENSBTAG00000014272;ENSBTAG00000015119;ENSBTAG00000017549;ENSBTAG00000018200;ENSBTAG00000020079;ENSBTAG00000021029;ENSBTAG00000021872;ENSBTAG00000026586;ENSBTAG00000039916	SLC4A4;SMAD1;TAF4B;GPLD1;FZD10;NPFFR2;EDNRA;INPP4B;MMUT;SIK3;KITLG;IL15;MAP3K4;PRR5L;RASGRP1;PPP1R14C;SMAD2
GO:0030004	cellular monovalent inorganic cation homeostasis	2	75	0.105108	0.41396	ENSBTAG00000002348;ENSBTAG00000020426	SLC4A4;TFAP2B
GO:0005975	carbohydrate metabolic process	2	465	0.859509	0.901	ENSBTAG00000002348;ENSBTAG00000020426	SLC4A4;TFAP2B
GO:0098662	inorganic cation transmembrane transport	5	606	0.460201	0.655758	ENSBTAG00000002348;ENSBTAG00000004647;ENSBTAG00000004979;ENSBTAG00000009552;ENSBTAG00000013674	SLC4A4;UCP1;MRS2;ATP2B1;EDNRA
GO:0098660	inorganic ion transmembrane transport	5	677	0.558545	0.712897	ENSBTAG00000002348;ENSBTAG00000004647;ENSBTAG00000004979;ENSBTAG00000009552;ENSBTAG00000013674	SLC4A4;UCP1;MRS2;ATP2B1;EDNRA
GO:0098655	cation transmembrane transport	6	718	0.432859	0.647797	ENSBTAG00000002348;ENSBTAG00000004647;ENSBTAG00000004979;ENSBTAG00000009552;ENSBTAG00000012628;ENSBTAG00000013674	SLC4A4;UCP1;MRS2;ATP2B1;SLC1A2;EDNRA
GO:0034220	ion transmembrane transport	6	915	0.669381	0.776679	ENSBTAG00000002348;ENSBTAG00000004647;ENSBTAG00000004979;ENSBTAG00000009552;ENSBTAG00000012628;ENSBTAG00000013674	SLC4A4;UCP1;MRS2;ATP2B1;SLC1A2;EDNRA
GO:0006811	ion transport	11	1259	0.31937	0.579712	ENSBTAG00000002348;ENSBTAG00000004647;ENSBTAG00000004979;ENSBTAG00000009552;ENSBTAG00000012628;ENSBTAG00000013674;ENSBTAG00000017146;ENSBTAG00000034522;ENSBTAG00000037738;ENSBTAG00000037917;ENSBTAG00000038430	SLC4A4;UCP1;MRS2;ATP2B1;SLC1A2;EDNRA;GRIK4;SLC10A7;SLC17A4;SLC17A1;ENSBTAG00000038430
GO:0006812	cation transport	8	933	0.378311	0.616709	ENSBTAG00000002348;ENSBTAG00000004647;ENSBTAG00000004979;ENSBTAG00000009552;ENSBTAG00000012628;ENSBTAG00000013674;ENSBTAG00000034522;ENSBTAG00000038430	SLC4A4;UCP1;MRS2;ATP2B1;SLC1A2;EDNRA;SLC10A7;ENSBTAG00000038430
GO:0002051	osteoblast fate commitment	1	3	0.0218689	0.334809	ENSBTAG00000002835	SMAD1
GO:1903672	positive regulation of sprouting angiogenesis	1	13	0.0913953	0.400616	ENSBTAG00000002835	SMAD1
GO:0001710	mesodermal cell fate commitment	1	14	0.0980723	0.405515	ENSBTAG00000002835	SMAD1
GO:1901522	positive regulation of transcription from RNA polymerase II promoter involved in cellular response to chemical stimulus	1	14	0.0980723	0.405515	ENSBTAG00000002835	SMAD1
GO:0060795	cell fate commitment involved in formation of primary germ layer	1	24	0.162222	0.470564	ENSBTAG00000002835	SMAD1
GO:1903670	regulation of sprouting angiogenesis	1	24	0.162222	0.470564	ENSBTAG00000002835	SMAD1
GO:0061036	positive regulation of cartilage development	1	25	0.168383	0.474479	ENSBTAG00000002835	SMAD1
GO:0048333	mesodermal cell differentiation	1	28	0.186596	0.488576	ENSBTAG00000002835	SMAD1
GO:0060038	cardiac muscle cell proliferation	1	30	0.198518	0.500402	ENSBTAG00000002835	SMAD1
GO:0030901	midbrain development	1	34	0.221843	0.513438	ENSBTAG00000002835	SMAD1
GO:0055017	cardiac muscle tissue growth	1	37	0.238895	0.523577	ENSBTAG00000002835	SMAD1
GO:1902895	positive regulation of pri-miRNA transcription by RNA polymerase II	1	39	0.250056	0.532406	ENSBTAG00000002835	SMAD1
GO:0051148	negative regulation of muscle cell differentiation	1	41	0.261054	0.537786	ENSBTAG00000002835	SMAD1
GO:0014855	striated muscle cell proliferation	1	42	0.266494	0.538677	ENSBTAG00000002835	SMAD1
GO:0060419	heart growth	1	42	0.266494	0.538677	ENSBTAG00000002835	SMAD1
GO:0061614	pri-miRNA transcription by RNA polymerase II	1	50	0.308601	0.568893	ENSBTAG00000002835	SMAD1
GO:1902893	regulation of pri-miRNA transcription by RNA polymerase II	1	50	0.308601	0.568893	ENSBTAG00000002835	SMAD1
GO:0045669	positive regulation of osteoblast differentiation	1	52	0.318748	0.57903	ENSBTAG00000002835	SMAD1
GO:0061035	regulation of cartilage development	1	58	0.34831	0.598294	ENSBTAG00000002835	SMAD1
GO:0051147	regulation of muscle cell differentiation	1	89	0.481931	0.665317	ENSBTAG00000002835	SMAD1
GO:0045667	regulation of osteoblast differentiation	1	102	0.529518	0.697091	ENSBTAG00000002835	SMAD1
GO:0045766	positive regulation of angiogenesis	1	107	0.546643	0.70685	ENSBTAG00000002835	SMAD1
GO:1904018	positive regulation of vasculature development	1	107	0.546643	0.70685	ENSBTAG00000002835	SMAD1
GO:0030902	hindbrain development	1	111	0.559897	0.712897	ENSBTAG00000002835	SMAD1
GO:0033002	muscle cell proliferation	1	114	0.569584	0.717284	ENSBTAG00000002835	SMAD1
GO:0045596	negative regulation of cell differentiation	1	484	0.973188	0.978147	ENSBTAG00000002835	SMAD1
GO:0045765	regulation of angiogenesis	2	194	0.417969	0.642006	ENSBTAG00000002835;ENSBTAG00000003505	SMAD1;DCN
GO:1901342	regulation of vasculature development	2	196	0.423042	0.645307	ENSBTAG00000002835;ENSBTAG00000003505	SMAD1;DCN
GO:0051093	negative regulation of developmental process	2	665	0.958746	0.966916	ENSBTAG00000002835;ENSBTAG00000003505	SMAD1;DCN
GO:2000026	regulation of multicellular organismal development	7	967	0.570506	0.717909	ENSBTAG00000002835;ENSBTAG00000003505;ENSBTAG00000009552;ENSBTAG00000011914;ENSBTAG00000017549;ENSBTAG00000018200;ENSBTAG00000021872	SMAD1;DCN;ATP2B1;RASSF10;KITLG;IL15;RASGRP1
GO:0035556	intracellular signal transduction	20	1934	0.0717648	0.378143	ENSBTAG00000002835;ENSBTAG00000003505;ENSBTAG00000006060;ENSBTAG00000007047;ENSBTAG00000007159;ENSBTAG00000009070;ENSBTAG00000011237;ENSBTAG00000011531;ENSBTAG00000013541;ENSBTAG00000013674;ENSBTAG00000014490;ENSBTAG00000014788;ENSBTAG00000017549;ENSBTAG00000020079;ENSBTAG00000021029;ENSBTAG00000021343;ENSBTAG00000021872;ENSBTAG00000032148;ENSBTAG00000037389;ENSBTAG00000039916	SMAD1;DCN;DCDC1;FZD10;ESR1;NPFFR2;PKHD1;SS18;LMO3;EDNRA;DDX39B;AKAP12;KITLG;MAP3K4;PRR5L;ARHGEF12;RASGRP1;TMEM117;TRIM44;SMAD2
GO:0001525	angiogenesis	4	357	0.267458	0.540165	ENSBTAG00000002835;ENSBTAG00000003505;ENSBTAG00000004982;ENSBTAG00000013674	SMAD1;DCN;GPLD1;EDNRA
GO:0048514	blood vessel morphogenesis	5	436	0.217248	0.513438	ENSBTAG00000002835;ENSBTAG00000003505;ENSBTAG00000004982;ENSBTAG00000013674;ENSBTAG00000020426	SMAD1;DCN;GPLD1;EDNRA;TFAP2B
GO:0001568	blood vessel development	5	505	0.313264	0.572484	ENSBTAG00000002835;ENSBTAG00000003505;ENSBTAG00000004982;ENSBTAG00000013674;ENSBTAG00000020426	SMAD1;DCN;GPLD1;EDNRA;TFAP2B
GO:0001944	vasculature development	5	533	0.353959	0.601882	ENSBTAG00000002835;ENSBTAG00000003505;ENSBTAG00000004982;ENSBTAG00000013674;ENSBTAG00000020426	SMAD1;DCN;GPLD1;EDNRA;TFAP2B
GO:0072359	circulatory system development	6	786	0.520465	0.690163	ENSBTAG00000002835;ENSBTAG00000003505;ENSBTAG00000004982;ENSBTAG00000013674;ENSBTAG00000020426;ENSBTAG00000039916	SMAD1;DCN;GPLD1;EDNRA;TFAP2B;SMAD2
GO:0048646	anatomical structure formation involved in morphogenesis	8	857	0.294144	0.560947	ENSBTAG00000002835;ENSBTAG00000003505;ENSBTAG00000004982;ENSBTAG00000008148;ENSBTAG00000009846;ENSBTAG00000013674;ENSBTAG00000020426;ENSBTAG00000039916	SMAD1;DCN;GPLD1;GCM1;MTHFD1L;EDNRA;TFAP2B;SMAD2
GO:0007167	enzyme linked receptor protein signaling pathway	7	748	0.310631	0.571746	ENSBTAG00000002835;ENSBTAG00000003505;ENSBTAG00000004982;ENSBTAG00000011531;ENSBTAG00000016071;ENSBTAG00000020426;ENSBTAG00000039916	SMAD1;DCN;GPLD1;SS18;HHIP;TFAP2B;SMAD2
GO:0071363	cellular response to growth factor stimulus	5	466	0.257942	0.537786	ENSBTAG00000002835;ENSBTAG00000003505;ENSBTAG00000016071;ENSBTAG00000020426;ENSBTAG00000039916	SMAD1;DCN;HHIP;TFAP2B;SMAD2
GO:0070848	response to growth factor	5	477	0.273318	0.545707	ENSBTAG00000002835;ENSBTAG00000003505;ENSBTAG00000016071;ENSBTAG00000020426;ENSBTAG00000039916	SMAD1;DCN;HHIP;TFAP2B;SMAD2
GO:0048738	cardiac muscle tissue development	2	142	0.280057	0.551492	ENSBTAG00000002835;ENSBTAG00000013674	SMAD1;EDNRA
GO:0042692	muscle cell differentiation	2	263	0.578037	0.723592	ENSBTAG00000002835;ENSBTAG00000013674	SMAD1;EDNRA
GO:0014706	striated muscle tissue development	2	265	0.582176	0.725268	ENSBTAG00000002835;ENSBTAG00000013674	SMAD1;EDNRA
GO:0061061	muscle structure development	2	436	0.833748	0.884151	ENSBTAG00000002835;ENSBTAG00000013674	SMAD1;EDNRA
GO:0007507	heart development	3	391	0.550426	0.708076	ENSBTAG00000002835;ENSBTAG00000013674;ENSBTAG00000039916	SMAD1;EDNRA;SMAD2
GO:0060537	muscle tissue development	3	282	0.342667	0.594528	ENSBTAG00000002835;ENSBTAG00000013674;ENSBTAG00000020426	SMAD1;EDNRA;TFAP2B
GO:0006954	inflammatory response	3	442	0.633829	0.759603	ENSBTAG00000002835;ENSBTAG00000007159;ENSBTAG00000021872	SMAD1;ESR1;RASGRP1
GO:0048589	developmental growth	6	473	0.13529	0.450796	ENSBTAG00000002835;ENSBTAG00000007159;ENSBTAG00000012628;ENSBTAG00000013674;ENSBTAG00000015119;ENSBTAG00000039916	SMAD1;ESR1;SLC1A2;EDNRA;SIK3;SMAD2
GO:0040007	growth	6	628	0.314638	0.573766	ENSBTAG00000002835;ENSBTAG00000007159;ENSBTAG00000012628;ENSBTAG00000013674;ENSBTAG00000015119;ENSBTAG00000039916	SMAD1;ESR1;SLC1A2;EDNRA;SIK3;SMAD2
GO:0035265	organ growth	3	106	0.0432046	0.3507	ENSBTAG00000002835;ENSBTAG00000007159;ENSBTAG00000039916	SMAD1;ESR1;SMAD2
GO:0000165	MAPK cascade	8	549	0.0494172	0.361821	ENSBTAG00000002835;ENSBTAG00000007047;ENSBTAG00000009070;ENSBTAG00000011237;ENSBTAG00000013541;ENSBTAG00000017549;ENSBTAG00000020079;ENSBTAG00000021872	SMAD1;FZD10;NPFFR2;PKHD1;LMO3;KITLG;MAP3K4;RASGRP1
GO:0045165	cell fate commitment	4	197	0.057363	0.364984	ENSBTAG00000002835;ENSBTAG00000008148;ENSBTAG00000013674;ENSBTAG00000039916	SMAD1;GCM1;EDNRA;SMAD2
GO:0048598	embryonic morphogenesis	5	481	0.27896	0.54979	ENSBTAG00000002835;ENSBTAG00000008148;ENSBTAG00000009846;ENSBTAG00000013674;ENSBTAG00000039916	SMAD1;GCM1;MTHFD1L;EDNRA;SMAD2
GO:0007399	nervous system development	9	1607	0.845423	0.892161	ENSBTAG00000002835;ENSBTAG00000008148;ENSBTAG00000009180;ENSBTAG00000009846;ENSBTAG00000011914;ENSBTAG00000012628;ENSBTAG00000013674;ENSBTAG00000016071;ENSBTAG00000020426	SMAD1;GCM1;NRSN1;MTHFD1L;RASSF10;SLC1A2;EDNRA;HHIP;TFAP2B
GO:0045595	regulation of cell differentiation	10	1111	0.299038	0.560947	ENSBTAG00000002835;ENSBTAG00000008148;ENSBTAG00000011914;ENSBTAG00000013541;ENSBTAG00000016549;ENSBTAG00000017549;ENSBTAG00000018200;ENSBTAG00000020426;ENSBTAG00000021872;ENSBTAG00000039916	SMAD1;GCM1;RASSF10;LMO3;CARMIL1;KITLG;IL15;TFAP2B;RASGRP1;SMAD2
GO:0007417	central nervous system development	3	643	0.855986	0.898599	ENSBTAG00000002835;ENSBTAG00000008148;ENSBTAG00000012628	SMAD1;GCM1;SLC1A2
GO:0002040	sprouting angiogenesis	2	95	0.154273	0.463933	ENSBTAG00000002835;ENSBTAG00000004982	SMAD1;GPLD1
GO:0042127	regulation of cell population proliferation	10	1120	0.307677	0.568893	ENSBTAG00000002835;ENSBTAG00000004982;ENSBTAG00000007159;ENSBTAG00000008733;ENSBTAG00000011237;ENSBTAG00000011914;ENSBTAG00000017549;ENSBTAG00000018200;ENSBTAG00000020330;ENSBTAG00000020426	SMAD1;GPLD1;ESR1;MAGED1;PKHD1;RASSF10;KITLG;IL15;BTG1;TFAP2B
GO:0071407	cellular response to organic cyclic compound	6	357	0.0480956	0.361821	ENSBTAG00000002835;ENSBTAG00000004982;ENSBTAG00000007159;ENSBTAG00000012628;ENSBTAG00000013541;ENSBTAG00000015016	SMAD1;GPLD1;ESR1;SLC1A2;LMO3;CALCOCO1
GO:0014070	response to organic cyclic compound	7	467	0.0566696	0.364984	ENSBTAG00000002835;ENSBTAG00000004982;ENSBTAG00000007159;ENSBTAG00000012628;ENSBTAG00000013541;ENSBTAG00000015016;ENSBTAG00000039916	SMAD1;GPLD1;ESR1;SLC1A2;LMO3;CALCOCO1;SMAD2
GO:0008285	negative regulation of cell population proliferation	5	457	0.245528	0.53026	ENSBTAG00000002835;ENSBTAG00000004982;ENSBTAG00000008733;ENSBTAG00000020330;ENSBTAG00000020426	SMAD1;GPLD1;MAGED1;BTG1;TFAP2B
GO:0001501	skeletal system development	7	396	0.0269172	0.334809	ENSBTAG00000002835;ENSBTAG00000009846;ENSBTAG00000013674;ENSBTAG00000015119;ENSBTAG00000016071;ENSBTAG00000034522;ENSBTAG00000039916	SMAD1;MTHFD1L;EDNRA;SIK3;HHIP;SLC10A7;SMAD2
GO:0045597	positive regulation of cell differentiation	8	595	0.0718904	0.378143	ENSBTAG00000002835;ENSBTAG00000011914;ENSBTAG00000013541;ENSBTAG00000016549;ENSBTAG00000017549;ENSBTAG00000018200;ENSBTAG00000021872;ENSBTAG00000039916	SMAD1;RASSF10;LMO3;CARMIL1;KITLG;IL15;RASGRP1;SMAD2
GO:0051216	cartilage development	2	156	0.31802	0.57903	ENSBTAG00000002835;ENSBTAG00000015119	SMAD1;SIK3
GO:0061448	connective tissue development	2	202	0.438124	0.648961	ENSBTAG00000002835;ENSBTAG00000015119	SMAD1;SIK3
GO:0060348	bone development	3	173	0.134644	0.450796	ENSBTAG00000002835;ENSBTAG00000015119;ENSBTAG00000034522	SMAD1;SIK3;SLC10A7
GO:0007420	brain development	2	460	0.855342	0.898599	ENSBTAG00000002835;ENSBTAG00000012628	SMAD1;SLC1A2
GO:0060322	head development	3	503	0.718828	0.805759	ENSBTAG00000002835;ENSBTAG00000012628;ENSBTAG00000013674	SMAD1;SLC1A2;EDNRA
GO:0007183	SMAD protein complex assembly	2	10	0.00231607	0.320696	ENSBTAG00000002835;ENSBTAG00000039916	SMAD1;SMAD2
GO:0001707	mesoderm formation	2	61	0.0739709	0.387365	ENSBTAG00000002835;ENSBTAG00000039916	SMAD1;SMAD2
GO:0060395	SMAD protein signal transduction	2	62	0.076081	0.388915	ENSBTAG00000002835;ENSBTAG00000039916	SMAD1;SMAD2
GO:0048332	mesoderm morphogenesis	2	63	0.0782101	0.388915	ENSBTAG00000002835;ENSBTAG00000039916	SMAD1;SMAD2
GO:0007498	mesoderm development	2	92	0.146629	0.457321	ENSBTAG00000002835;ENSBTAG00000039916	SMAD1;SMAD2
GO:0001704	formation of primary germ layer	2	104	0.177632	0.480233	ENSBTAG00000002835;ENSBTAG00000039916	SMAD1;SMAD2
GO:0007369	gastrulation	2	147	0.293649	0.560537	ENSBTAG00000002835;ENSBTAG00000039916	SMAD1;SMAD2
GO:0007179	transforming growth factor beta receptor signaling pathway	2	151	0.304499	0.567073	ENSBTAG00000002835;ENSBTAG00000039916	SMAD1;SMAD2
GO:0071560	cellular response to transforming growth factor beta stimulus	2	179	0.379252	0.617393	ENSBTAG00000002835;ENSBTAG00000039916	SMAD1;SMAD2
GO:0071559	response to transforming growth factor beta	2	184	0.392282	0.628325	ENSBTAG00000002835;ENSBTAG00000039916	SMAD1;SMAD2
GO:0045944	positive regulation of transcription by RNA polymerase II	11	993	0.113168	0.427224	ENSBTAG00000002835;ENSBTAG00000003399;ENSBTAG00000003505;ENSBTAG00000004257;ENSBTAG00000007159;ENSBTAG00000008148;ENSBTAG00000011373;ENSBTAG00000011531;ENSBTAG00000015016;ENSBTAG00000020426;ENSBTAG00000039916	SMAD1;SMARCA5;DCN;TAF4B;ESR1;GCM1;MAML3;SS18;CALCOCO1;TFAP2B;SMAD2
GO:0065003	protein-containing complex assembly	11	1285	0.343605	0.594528	ENSBTAG00000002835;ENSBTAG00000003399;ENSBTAG00000006883;ENSBTAG00000007159;ENSBTAG00000012628;ENSBTAG00000012738;ENSBTAG00000014490;ENSBTAG00000016549;ENSBTAG00000039916;ENSBTAG00000047358;ENSBTAG00000050380	SMAD1;SMARCA5;EIF4B;ESR1;SLC1A2;ZNF827;DDX39B;CARMIL1;SMAD2;HIGD1C;KCTD1
GO:0034622	cellular protein-containing complex assembly	9	906	0.221633	0.513438	ENSBTAG00000002835;ENSBTAG00000003399;ENSBTAG00000006883;ENSBTAG00000007159;ENSBTAG00000012738;ENSBTAG00000014490;ENSBTAG00000016549;ENSBTAG00000039916;ENSBTAG00000047358	SMAD1;SMARCA5;EIF4B;ESR1;ZNF827;DDX39B;CARMIL1;SMAD2;HIGD1C
GO:0043933	protein-containing complex subunit organization	13	1440	0.258334	0.537786	ENSBTAG00000002835;ENSBTAG00000003399;ENSBTAG00000005479;ENSBTAG00000006883;ENSBTAG00000007159;ENSBTAG00000012628;ENSBTAG00000012738;ENSBTAG00000014490;ENSBTAG00000016549;ENSBTAG00000031917;ENSBTAG00000039916;ENSBTAG00000047358;ENSBTAG00000050380	SMAD1;SMARCA5;LIPC;EIF4B;ESR1;SLC1A2;ZNF827;DDX39B;CARMIL1;SCAF8;SMAD2;HIGD1C;KCTD1
GO:0006468	protein phosphorylation	12	1277	0.227579	0.513438	ENSBTAG00000002835;ENSBTAG00000004257;ENSBTAG00000007047;ENSBTAG00000009070;ENSBTAG00000013674;ENSBTAG00000015119;ENSBTAG00000017549;ENSBTAG00000018200;ENSBTAG00000020079;ENSBTAG00000021029;ENSBTAG00000021872;ENSBTAG00000039916	SMAD1;TAF4B;FZD10;NPFFR2;EDNRA;SIK3;KITLG;IL15;MAP3K4;PRR5L;RASGRP1;SMAD2
GO:0030509	BMP signaling pathway	3	129	0.0694816	0.376331	ENSBTAG00000002835;ENSBTAG00000020426;ENSBTAG00000039916	SMAD1;TFAP2B;SMAD2
GO:0071772	response to BMP	3	137	0.0799786	0.396045	ENSBTAG00000002835;ENSBTAG00000020426;ENSBTAG00000039916	SMAD1;TFAP2B;SMAD2
GO:0071773	cellular response to BMP stimulus	3	137	0.0799786	0.396045	ENSBTAG00000002835;ENSBTAG00000020426;ENSBTAG00000039916	SMAD1;TFAP2B;SMAD2
GO:0007178	transmembrane receptor protein serine/threonine kinase signaling pathway	3	293	0.364738	0.608839	ENSBTAG00000002835;ENSBTAG00000020426;ENSBTAG00000039916	SMAD1;TFAP2B;SMAD2
GO:0071495	cellular response to endogenous stimulus	12	923	0.0387749	0.3507	ENSBTAG00000002835;ENSBTAG00000004647;ENSBTAG00000004982;ENSBTAG00000007159;ENSBTAG00000009552;ENSBTAG00000012628;ENSBTAG00000013541;ENSBTAG00000013674;ENSBTAG00000015016;ENSBTAG00000016071;ENSBTAG00000020426;ENSBTAG00000039916	SMAD1;UCP1;GPLD1;ESR1;ATP2B1;SLC1A2;LMO3;EDNRA;CALCOCO1;HHIP;TFAP2B;SMAD2
GO:0009719	response to endogenous stimulus	12	995	0.0618299	0.369698	ENSBTAG00000002835;ENSBTAG00000004647;ENSBTAG00000004982;ENSBTAG00000007159;ENSBTAG00000009552;ENSBTAG00000012628;ENSBTAG00000013541;ENSBTAG00000013674;ENSBTAG00000015016;ENSBTAG00000016071;ENSBTAG00000020426;ENSBTAG00000039916	SMAD1;UCP1;GPLD1;ESR1;ATP2B1;SLC1A2;LMO3;EDNRA;CALCOCO1;HHIP;TFAP2B;SMAD2
GO:1900224	positive regulation of nodal signaling pathway involved in determination of lateral mesoderm left/right asymmetry	1	1	0.00734301	0.320696	ENSBTAG00000039916	SMAD2
GO:0007352	zygotic specification of dorsal/ventral axis	1	2	0.0146325	0.320696	ENSBTAG00000039916	SMAD2
GO:1900145	regulation of nodal signaling pathway involved in determination of left/right asymmetry	1	2	0.0146325	0.320696	ENSBTAG00000039916	SMAD2
GO:1900175	regulation of nodal signaling pathway involved in determination of lateral mesoderm left/right asymmetry	1	2	0.0146325	0.320696	ENSBTAG00000039916	SMAD2
GO:0038107	nodal signaling pathway involved in determination of left/right asymmetry	1	4	0.0290526	0.334809	ENSBTAG00000039916	SMAD2
GO:1900094	regulation of transcription from RNA polymerase II promoter involved in determination of left/right symmetry	1	4	0.0290526	0.334809	ENSBTAG00000039916	SMAD2
GO:1900107	regulation of nodal signaling pathway	1	4	0.0290526	0.334809	ENSBTAG00000039916	SMAD2
GO:1900164	nodal signaling pathway involved in determination of lateral mesoderm left/right asymmetry	1	4	0.0290526	0.334809	ENSBTAG00000039916	SMAD2
GO:0003140	determination of left/right asymmetry in lateral mesoderm	1	6	0.0432634	0.3507	ENSBTAG00000039916	SMAD2
GO:0007182	common-partner SMAD protein phosphorylation	1	6	0.0432634	0.3507	ENSBTAG00000039916	SMAD2
GO:0032927	positive regulation of activin receptor signaling pathway	1	7	0.0502912	0.361821	ENSBTAG00000039916	SMAD2
GO:0048617	embryonic foregut morphogenesis	1	7	0.0502912	0.361821	ENSBTAG00000039916	SMAD2
GO:0007440	foregut morphogenesis	1	8	0.0572677	0.364984	ENSBTAG00000039916	SMAD2
GO:0009950	dorsal/ventral axis specification	1	9	0.0641935	0.369698	ENSBTAG00000039916	SMAD2
GO:0048340	paraxial mesoderm morphogenesis	1	10	0.0710688	0.376331	ENSBTAG00000039916	SMAD2
GO:0038092	nodal signaling pathway	1	12	0.0846693	0.400616	ENSBTAG00000039916	SMAD2
GO:0048368	lateral mesoderm development	1	12	0.0846693	0.400616	ENSBTAG00000039916	SMAD2
GO:0032925	regulation of activin receptor signaling pathway	1	16	0.111281	0.422795	ENSBTAG00000039916	SMAD2
GO:0048339	paraxial mesoderm development	1	17	0.117813	0.433016	ENSBTAG00000039916	SMAD2
GO:0060039	pericardium development	1	18	0.124297	0.437164	ENSBTAG00000039916	SMAD2
GO:0062009	secondary palate development	1	18	0.124297	0.437164	ENSBTAG00000039916	SMAD2
GO:0000578	embryonic axis specification	1	29	0.192579	0.490671	ENSBTAG00000039916	SMAD2
GO:0030513	positive regulation of BMP signaling pathway	1	32	0.210266	0.509416	ENSBTAG00000039916	SMAD2
GO:0032924	activin receptor signaling pathway	1	32	0.210266	0.509416	ENSBTAG00000039916	SMAD2
GO:0048546	digestive tract morphogenesis	1	34	0.221843	0.513438	ENSBTAG00000039916	SMAD2
GO:0072132	mesenchyme morphogenesis	1	36	0.233252	0.519205	ENSBTAG00000039916	SMAD2
GO:0010718	positive regulation of epithelial to mesenchymal transition	1	38	0.244496	0.52892	ENSBTAG00000039916	SMAD2
[truncated: 370 more rows]
